# Supplementary material
Source: PubMed Central journal article supplement (PMC5746848)
Supplement: jo7b02267_si_001.pdf [file jo7b02267_si_001.pdf]

# Synthesis of Polyfluorinated Biphenyls: Pushing the Boundaries of Suzuki-Miyaura Cross Coupling with Electron-Poor Substrates.

David Bulfield\* and Stefan M. Huber\*

## TABLE OF CONTENTS

|                                                                       |     |
|-----------------------------------------------------------------------|-----|
| Additional Screening Data.....                                        | S3  |
| Screening of boronic acid derivatives as nucleophiles.....            | S3  |
| Screening Data: Boronic Acid Protecting Groups.....                   | S5  |
| Spectroscopic Data.....                                               | S7  |
| Polyfluorinated Biphenyls .....                                       | S7  |
| 2,3,3',4',5,5',6-Heptafluoro-1,1'-biphenyl (3).....                   | S7  |
| 2,3,3',5,5',6-Hexafluoro-1,1'-biphenyl (10) .....                     | S12 |
| 2,2',3,4',5,5',6-Heptafluoro-1,1'-biphenyl (11).....                  | S15 |
| 2,2',3,3',4,5',6'-Heptafluoro-1,1'-biphenyl (12).....                 | S18 |
| 2,2',3,3',5,5',6,6'-Octafluoro-1,1'-biphenyl (13).....                | S21 |
| 2,2',3,3',4,5,5',6'-Octafluoro-1,1'-biphenyl (20).....                | S24 |
| 2,3,3',4,5,5',6-Heptafluoro-1,1'-biphenyl (21).....                   | S27 |
| 2,3,3',4,4',5,5',6-Octafluoro-1,1'-biphenyl (22).....                 | S30 |
| 2,2',3,4,4',5,5',6-Octafluoro-1,1'-biphenyl (23).....                 | S33 |
| 2,2',3,3',4,4',5,5',6-Nonafluoro-1,1'-biphenyl (24).....              | S37 |
| 2,3',4,4',5,6-Hexafluoro-1,1'-biphenyl (25) .....                     | S38 |
| 2,2',4,4',5,6'-Hexafluoro-1,1'-biphenyl (26) .....                    | S41 |
| 2,2',3,4,4',5,6'-Heptafluoro-1,1'-biphenyl (27).....                  | S44 |
| 2,3,3',4,4',5',6-Heptafluoro-1,1'-biphenyl (28).....                  | S48 |
| 3,3',4,4',5,5'-Hexafluoro-1,1'-biphenyl (4) .....                     | S51 |
| 2,3',4,4',5,5'-Hexafluoro-1,1'-biphenyl (29) .....                    | S54 |
| 2,2',4,4',5,5'-Hexafluoro-1,1'-biphenyl (30) .....                    | S57 |
| 2,3,3',4,4',5'-Hexafluoro-1,1'-biphenyl (31) .....                    | S60 |
| 2,2',3,4,4',5'-Hexafluoro-1,1'-biphenyl (32) .....                    | S63 |
| 3,3',4,5,5'-Pentafluoro-4'-(trifluoromethyl)-1,1'-biphenyl (33) ..... | S66 |
| Polyfluorinated Phenylpyridines .....                                 | S69 |
| 4-(3,5-Difluorophenyl)-2,3,5-trifluoropyridine (34) .....             | S69 |
| 2,3,5-Trifluoro-4-(3,4,5-trifluorophenyl)pyridine (35) .....          | S72 |
| 2,3,5-Trifluoro-4-(2,3,4-trifluorophenyl)pyridine (36) .....          | S75 |
| 2,3,5-Trifluoro-4-(2,3,4,5-tetrafluorophenyl)pyridine (37) .....      | S78 |
| 4-(3,5-Difluorophenyl)-2,3,5,6-tetrafluoropyridine (38) .....         | S81 |

|                                                                                 |      |
|---------------------------------------------------------------------------------|------|
| 2,3,5,6-Tetrafluoro-4-(3,4,5-trifluorophenyl)pyridine (39) .....                | S84  |
| Iodobenzenes and Iodopyridines .....                                            | S87  |
| 1,2,4,5-Tetrafluoro-3-iodobenzene (1) .....                                     | S87  |
| 1,2,3,5-Tetrafluoro-4-iodobenzene (40) .....                                    | S90  |
| 2,3,5-Trifluoro-4-iodopyridine (41) .....                                       | S94  |
| 2,3,5,6-Tetrafluoro-4-iodopyridine (42) .....                                   | S97  |
| Boronic acids .....                                                             | S99  |
| (2,4,5-Trifluorophenyl)boronic acid (6) .....                                   | S99  |
| (2,3,4-Trifluorophenyl)boronic acid (7) .....                                   | S102 |
| Boronic acid esters .....                                                       | S106 |
| 5,5-Dimethyl-2-(2,3,4-trifluorophenyl)-1,3,2-dioxaborinane (15) .....           | S106 |
| 5,5-Dimethyl-2-(2,4,5-trifluorophenyl)-1,3,2-dioxaborinane (17) .....           | S110 |
| 5,5-Dimethyl-2-(2,3,5,6-tetrafluorophenyl)-1,3,2-dioxaborinane (18) .....       | S114 |
| 6-Methyl-2-(2,3,4-trifluorophenyl)-1,3,6,2-dioxazaborocane-4,8-dione (16) ..... | S118 |

## ADDITIONAL SCREENING DATA

## Screening of boronic acid derivatives as nucleophiles

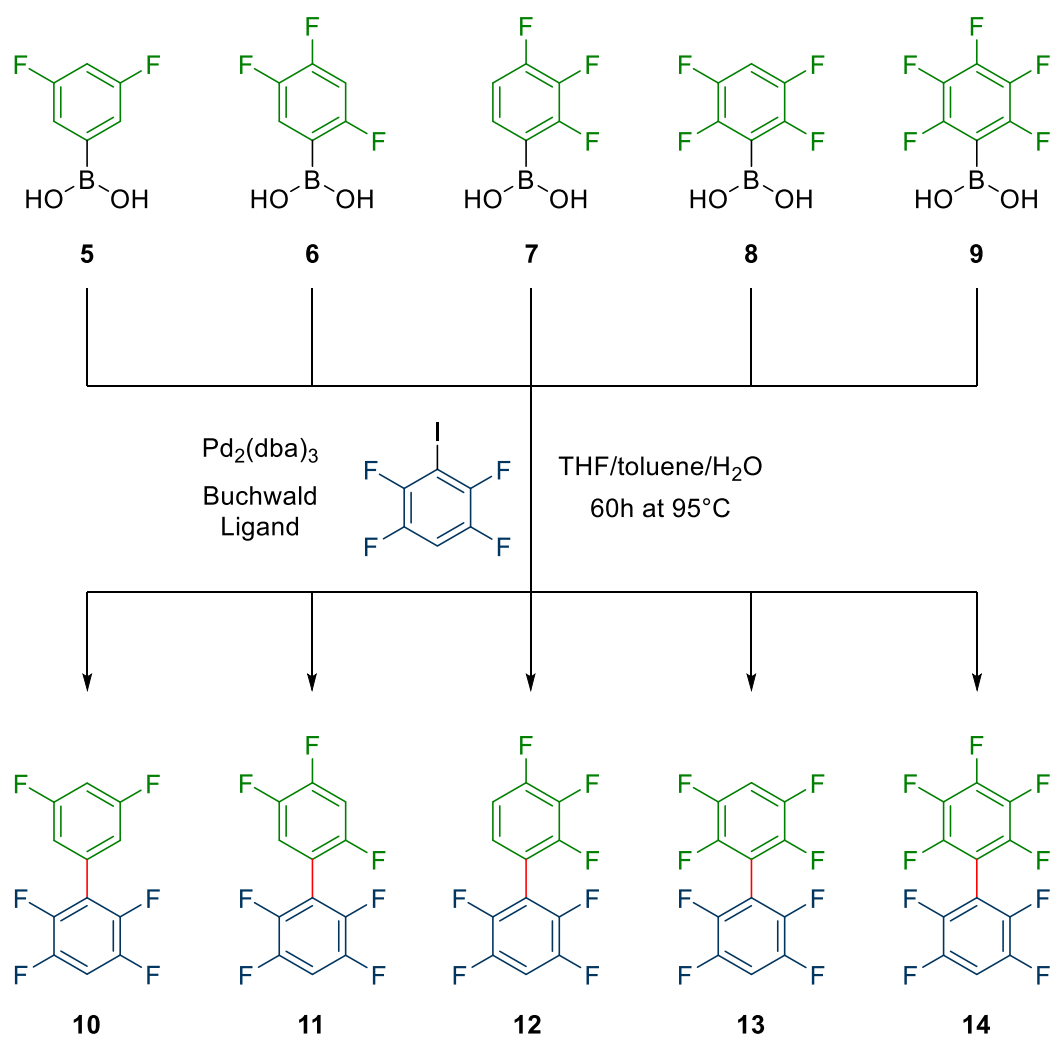

**Scheme S1.** Different boronic acids (**5-9**) which were tested as nucleophiles in the Suzuki Miyaura coupling and their corresponding products (**10-14**).

**Table S1.** Ligand Screening for the coupling of different fluorinated boronic acids to 2,3,5,6-tetrafluoroiodo-benzene.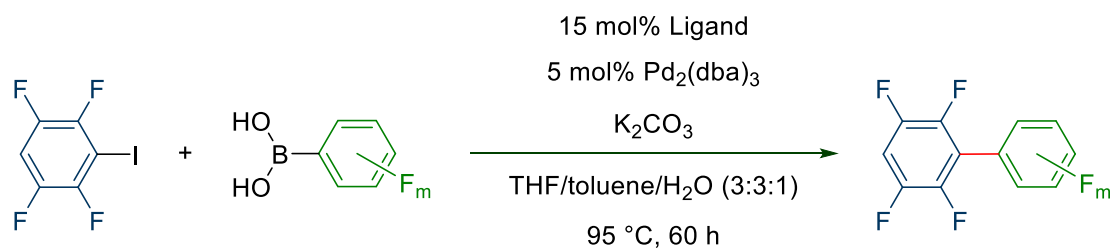

| entry <sup>a</sup> | boronic acid | ligand                  | product | yield          |
|--------------------|--------------|-------------------------|---------|----------------|
| 1                  | 2            | CyJohnPhos              | 3       | 98%            |
| 2                  | 5            | CyJohnPhos              | 10      | 88%            |
| 3                  | 6            | CyJohnPhos <sup>b</sup> | 11      | 35%            |
| 4                  | 7            | CyJohnPhos <sup>b</sup> | 12      | 40%            |
| 5                  | 8            | CyJohnPhos              | 13      | 31%            |
| 6                  | 9            | CyJohnPhos              | 14      | -              |
| 8                  | 5            | DavePhos                | 10      | 98%            |
| 9                  | 5            | MePhos                  | 10      | 94%            |
| 10                 | 5            | RuPhos                  | 10      | 90%            |
| 11                 | 5            | XPhos                   | 10      | 99%            |
| 12                 | 5            | SPhos                   | 10      | 94%            |
| 14                 | 6            | DavePhos <sup>b</sup>   | 11      | 36%            |
| 15                 | 6            | MePhos <sup>b</sup>     | 11      | 45%            |
| 16                 | 6            | RuPhos                  | 11      | 47%            |
| 17                 | 6            | XPhos                   | 11      | 45%            |
| 12                 | 6            | SPhos <sup>b</sup>      | 11      | 48%            |
| 14                 | 7            | DavePhos <sup>b</sup>   | 12      | 38%            |
| 15                 | 7            | MePhos <sup>b</sup>     | 12      | 86%            |
| 16                 | 7            | RuPhos                  | 12      | 27%            |
| 17                 | 7            | XPhos                   | 12      | 28%            |
| 18                 | 7            | SPhos <sup>b</sup>      | 12      | 74%            |
| 20                 | 8            | DavePhos                | 13      | 58%            |
| 21                 | 8            | MePhos                  | 13      | -              |
| 22                 | 8            | RuPhos                  | 13      | 27%            |
| 23                 | 8            | XPhos                   | 13      | 15%            |
| 24                 | 8            | SPhos <sup>b</sup>      | 13      | - <sup>c</sup> |
| 25                 | 8 without 1  | DavePhos                | 13      | 19%            |
| 26                 | 9            | DavePhos                | 14      | -              |
| 27                 | 9            | MePhos                  | 14      | -              |
| 28                 | 9            | RuPhos                  | 14      | -              |
| 29                 | 9            | XPhos                   | 14      | -              |
| 30                 | 9            | SPhos                   | 14      | -              |

<sup>a</sup>Reactions were performed with 1 equiv. **1** and the corresponding boronic acid and 2.2 equiv. of Na<sub>2</sub>CO<sub>3</sub> with 5 mol% Pd<sub>2</sub>(dba)<sub>3</sub> and a 15 mol% of the corresponding ligand at 95°C for 60h on a 0.18 mmol scale. <sup>b</sup>contains significant amounts of a homocoupling side product (>2%). <sup>c</sup>complex product mixture.

## Screening Data: Boronic Acid Protecting Groups

**Table S2.** Ligand Screening for the coupling of different fluorinated protected boronic acids to 2,3,5,6-tetrafluoroiodo-benzene.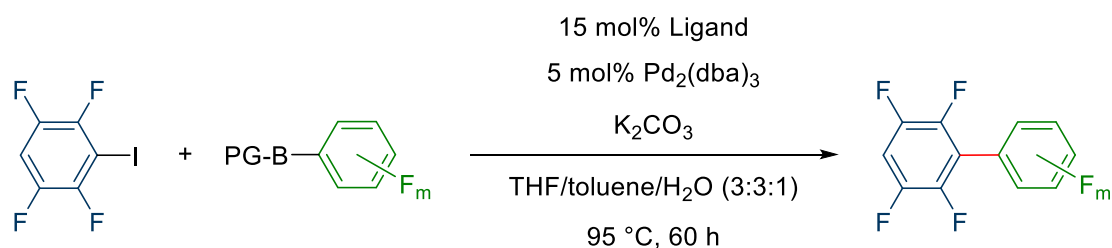

| entry <sup>a</sup> | protected boronic acid | ligand                  | product | yield |
|--------------------|------------------------|-------------------------|---------|-------|
| 1                  | <br>15                 | CyJohnPhos              | 12      | 76%   |
| 2                  |                        | DavePhos                | 12      | 84%   |
| 3                  |                        | MePhos                  | 12      | 79%   |
| 4                  |                        | RuPhos                  | 12      | 68%   |
| 5                  |                        | XPhos                   | 12      | 58%   |
| 6                  |                        | SPhos                   | 12      | 61%   |
| 7                  | <br>16                 | CyJohnPhos              | 12      | 80%   |
| 8                  |                        | DavePhos                | 12      | 68%   |
| 9                  |                        | MePhos                  | 12      | 73%   |
| 10                 |                        | RuPhos                  | 12      | 80%   |
| 11                 |                        | XPhos                   | 12      | 61%   |
| 12                 |                        | SPhos                   | 12      | 51%   |
| 13                 | <br>17                 | CyJohnPhos <sup>b</sup> | 11      | 78%   |
| 14                 |                        | DavePhos <sup>b</sup>   | 11      | 52%   |
| 15                 |                        | MePhos <sup>b</sup>     | 11      | 78%   |
| 16                 |                        | RuPhos                  | 11      | 63%   |
| 17                 |                        | XPhos                   | 11      | 30%   |
| 18                 |                        | SPhos <sup>b</sup>      | 11      | 29%   |
| 19                 | <br>18                 | CyJohnPhos              | 13      | 20%   |
| 20                 |                        | DavePhos                | 13      | 10%   |
| 21                 |                        | MePhos                  | 13      | 82%   |
| 22                 |                        | RuPhos                  | 13      | 39%   |
| 23                 |                        | XPhos                   | 13      | -     |
| 24                 |                        | SPhos                   | 13      | -     |
| 25                 | <br>19                 | CyJohnPhos              | 20      | 24%   |
| 26                 |                        | DavePhos                | 20      | 62%   |
| 27                 |                        | MePhos                  | 20      | 10%   |
| 28                 |                        | RuPhos                  | 20      | 10%   |
| 29                 |                        | XPhos                   | 20      | 17%   |
| 30                 |                        | SPhos                   | 20      | 10%   |

<sup>a</sup>Reactions were performed with 1 equiv. **1** and the corresponding boronic acid and 2.2 equiv. of Na<sub>2</sub>CO<sub>3</sub> with 5 mol% Pd<sub>2</sub>(dba)<sub>3</sub> and a 15 mol% of the corresponding ligand at 95°C for 60h on a 0.18 mmol scale. <sup>b</sup>contains significant amounts of a homocoupling side product (>2%).

**Table S3.** Homocoupling in the reactions of **1** with the electrophiles **6** and **17**.

| entry    | ligand     | homocoupling <sup>a</sup> ( <b>6</b> ; B(OH) <sub>2</sub> ) | homocoupling <sup>a</sup> ( <b>17</b> ; B-ester) |
|----------|------------|-------------------------------------------------------------|--------------------------------------------------|
| <b>1</b> | CyJohnPhos | 30%                                                         | 7%                                               |
| <b>2</b> | DavePhos   | 22%                                                         | 19%                                              |
| <b>3</b> | MePhos     | 20%                                                         | 9%                                               |
| <b>4</b> | SPhos      | 8%                                                          | 5%                                               |

<sup>a</sup>Homocoupling was determined by GC in the final product mixture.

## SPECTROSCOPIC DATA

## Polyfluorinated Biphenyls

## 2,3,3',4',5,5',6-Heptafluoro-1,1'-biphenyl (3)

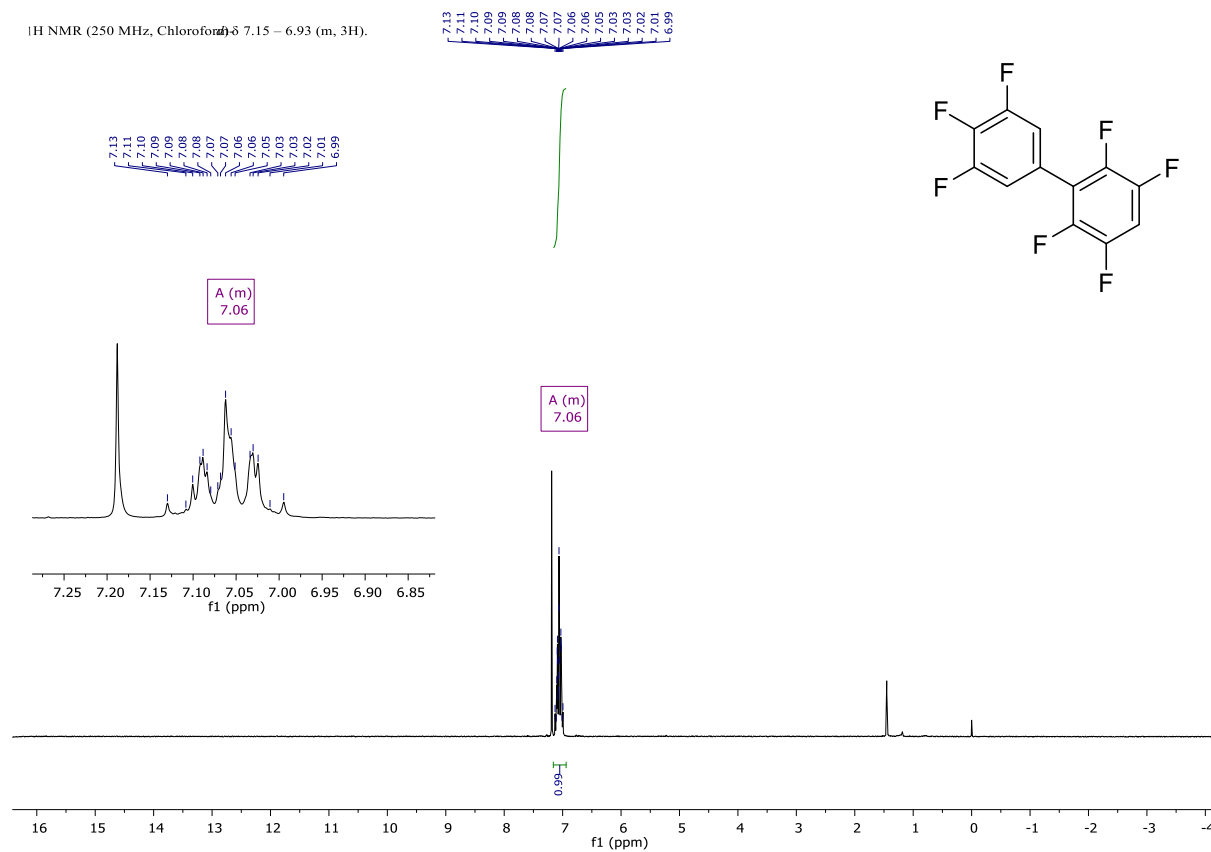Figure S1 <sup>1</sup>H-NMR: 2,3,3',4',5,5',6-Heptafluoro-1,1'-biphenyl

$^{19}\text{F}$  NMR (235 MHz, Chloroform- $d_3$ )  $\delta$  -133.34 (dd,  $J = 20.4, 8.0$  Hz), -137.54 -- -138.26 (m), -143.25 -- -143.73 (m), -158.25 (tt,  $J = 20.7, 6.4$  Hz).

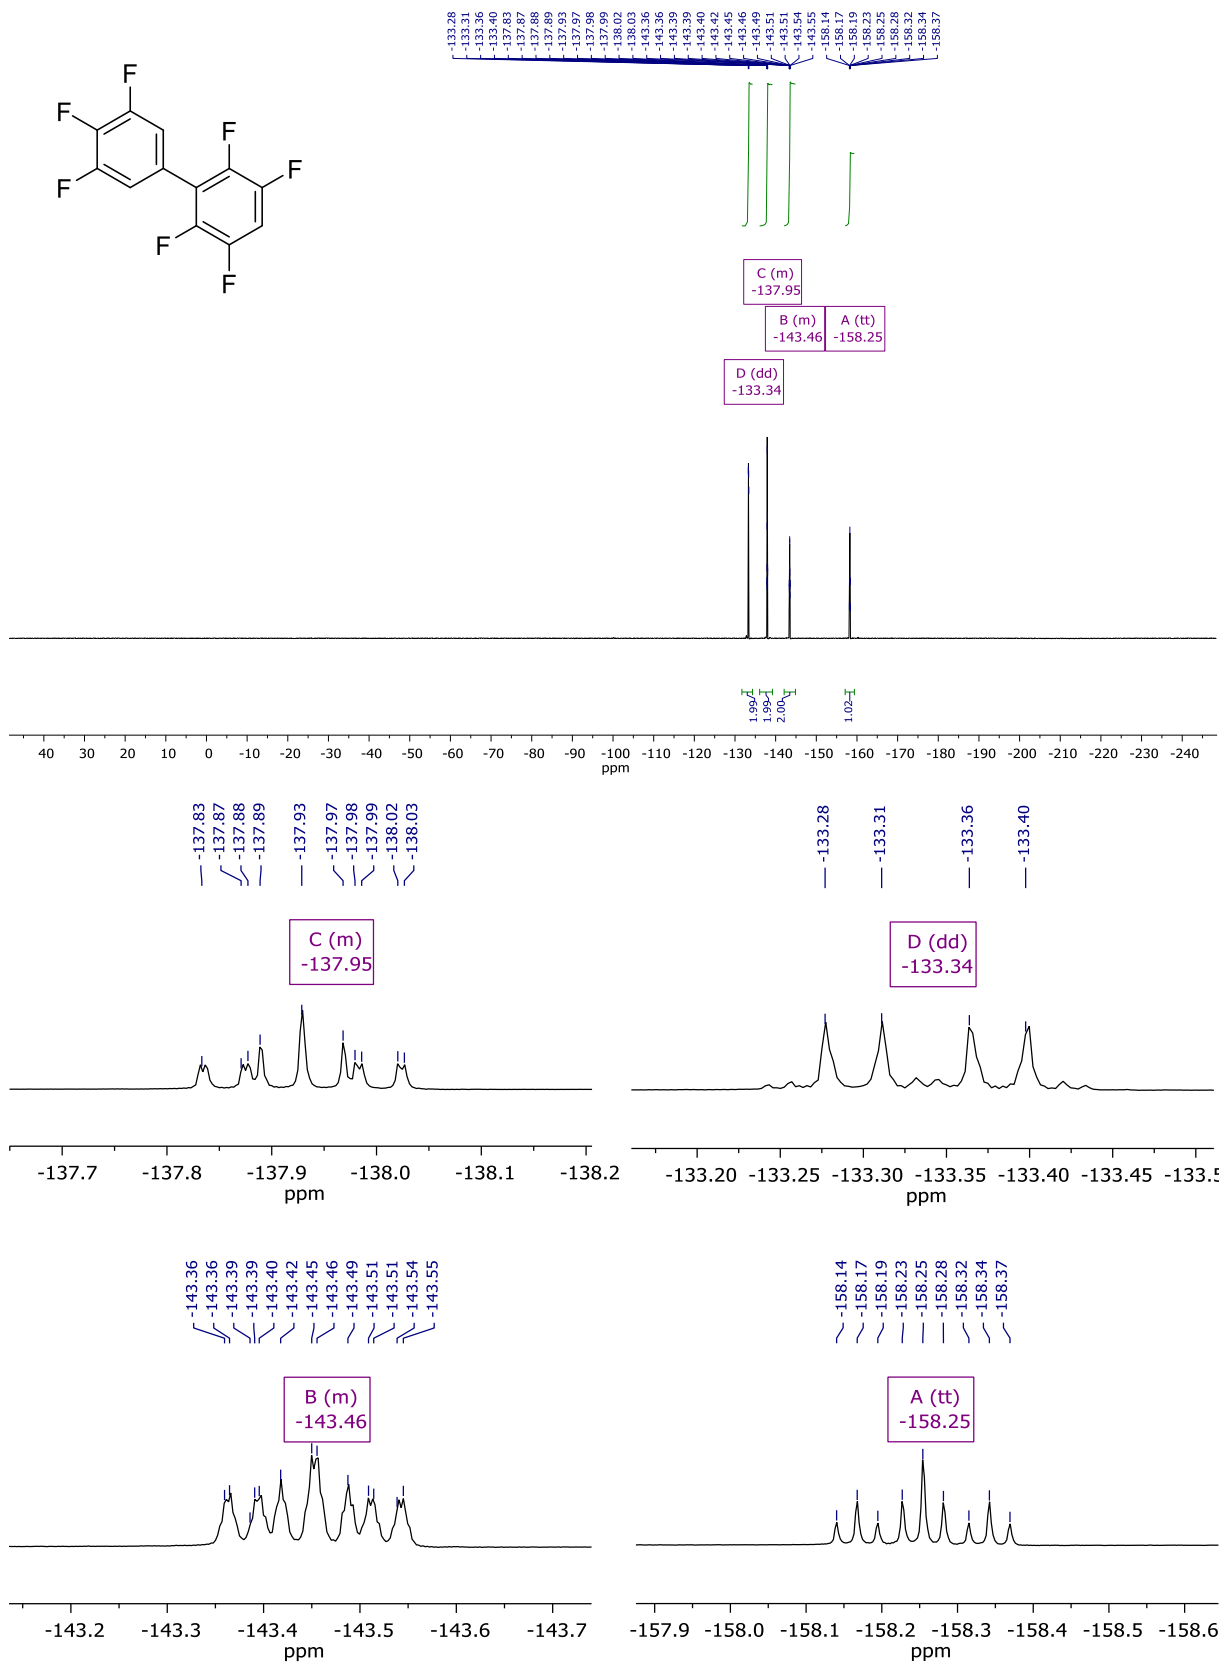

Figure S2  $^{19}\text{F}$ -NMR: 2,3,3',4',5,5',6-Heptafluoro-1,1'-biphenyl



$^{19}\text{F}$  NMR (235 MHz, Chloroform- $d_3$ )  $\delta$  -133.34 (d,  $J = 20.5$  Hz), -137.41 -- -138.40 (m), -142.83 -- -144.21 (m), -158.26 ( $t$ ,  $J = 20.5$  Hz).

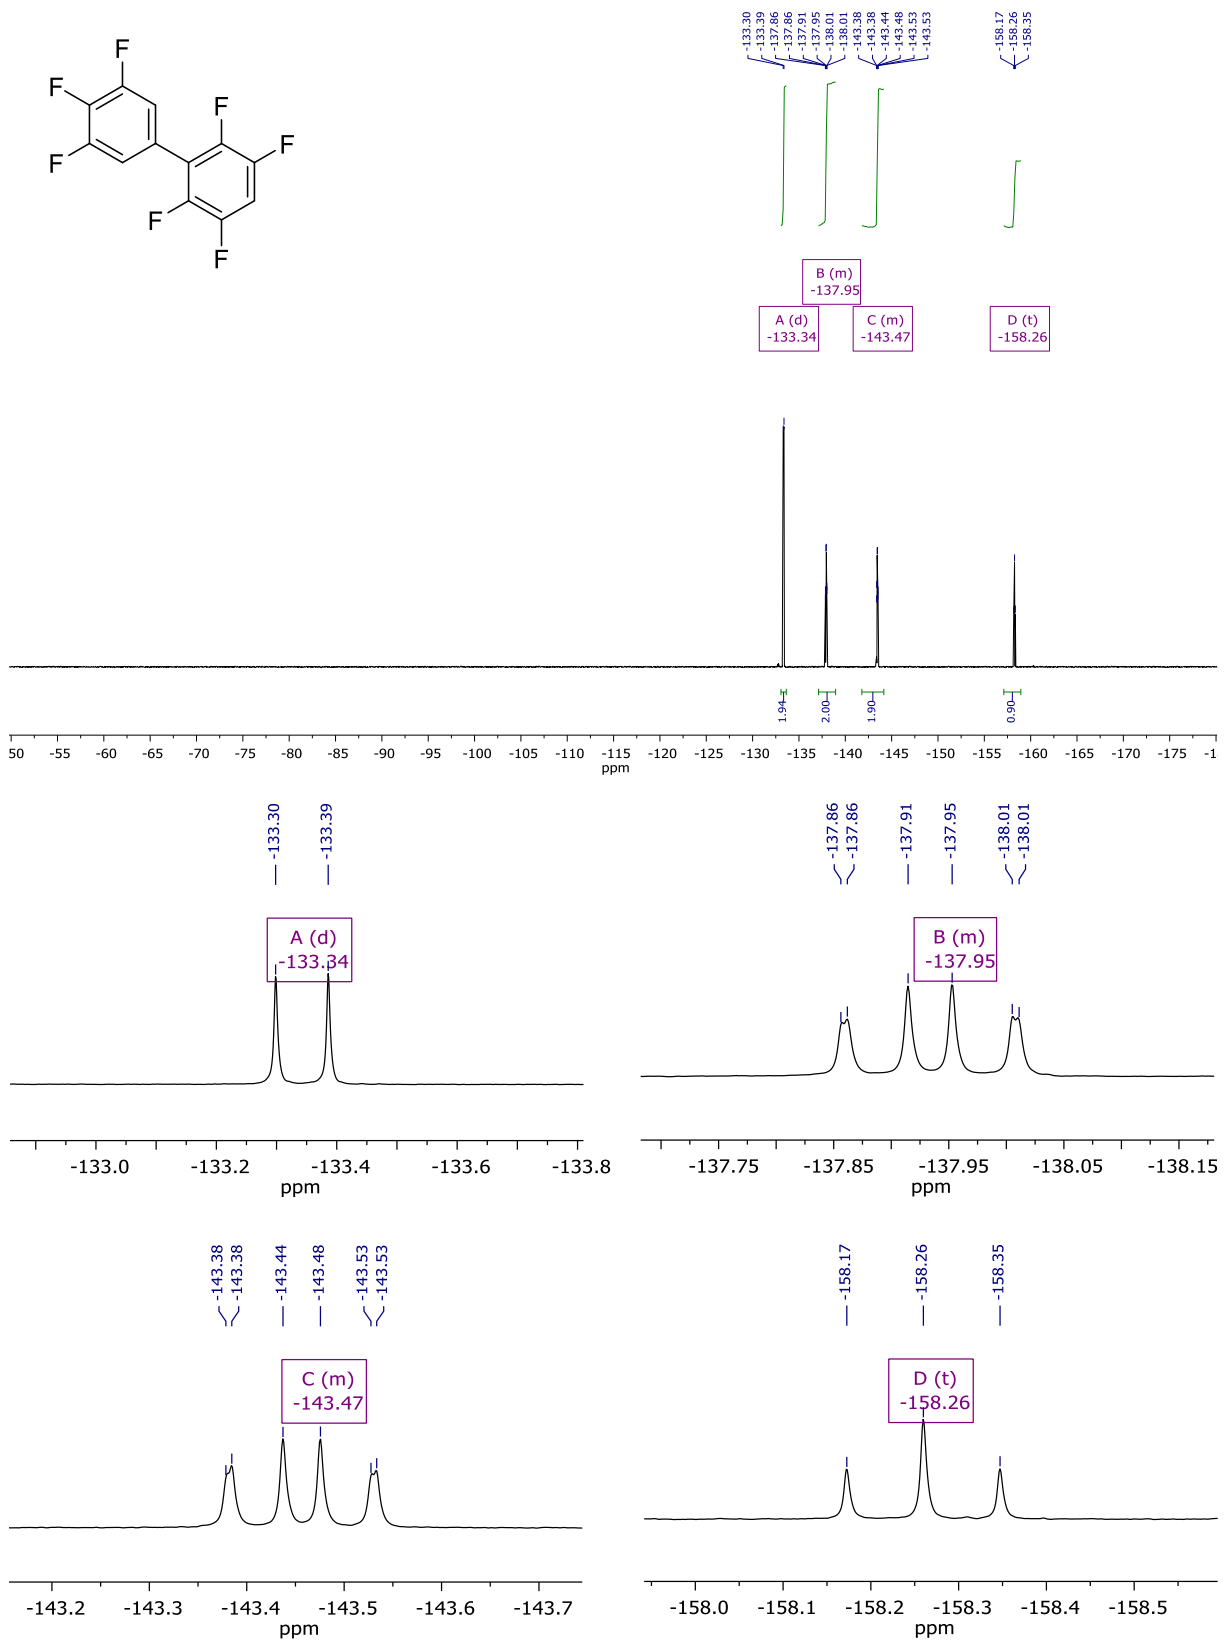

Figure S3  $^{19}\text{F}$ -NMR [ $^1\text{H}$ ]: 2,3,3',4',5,5',6-Heptafluoro-1,1'-biphenyl

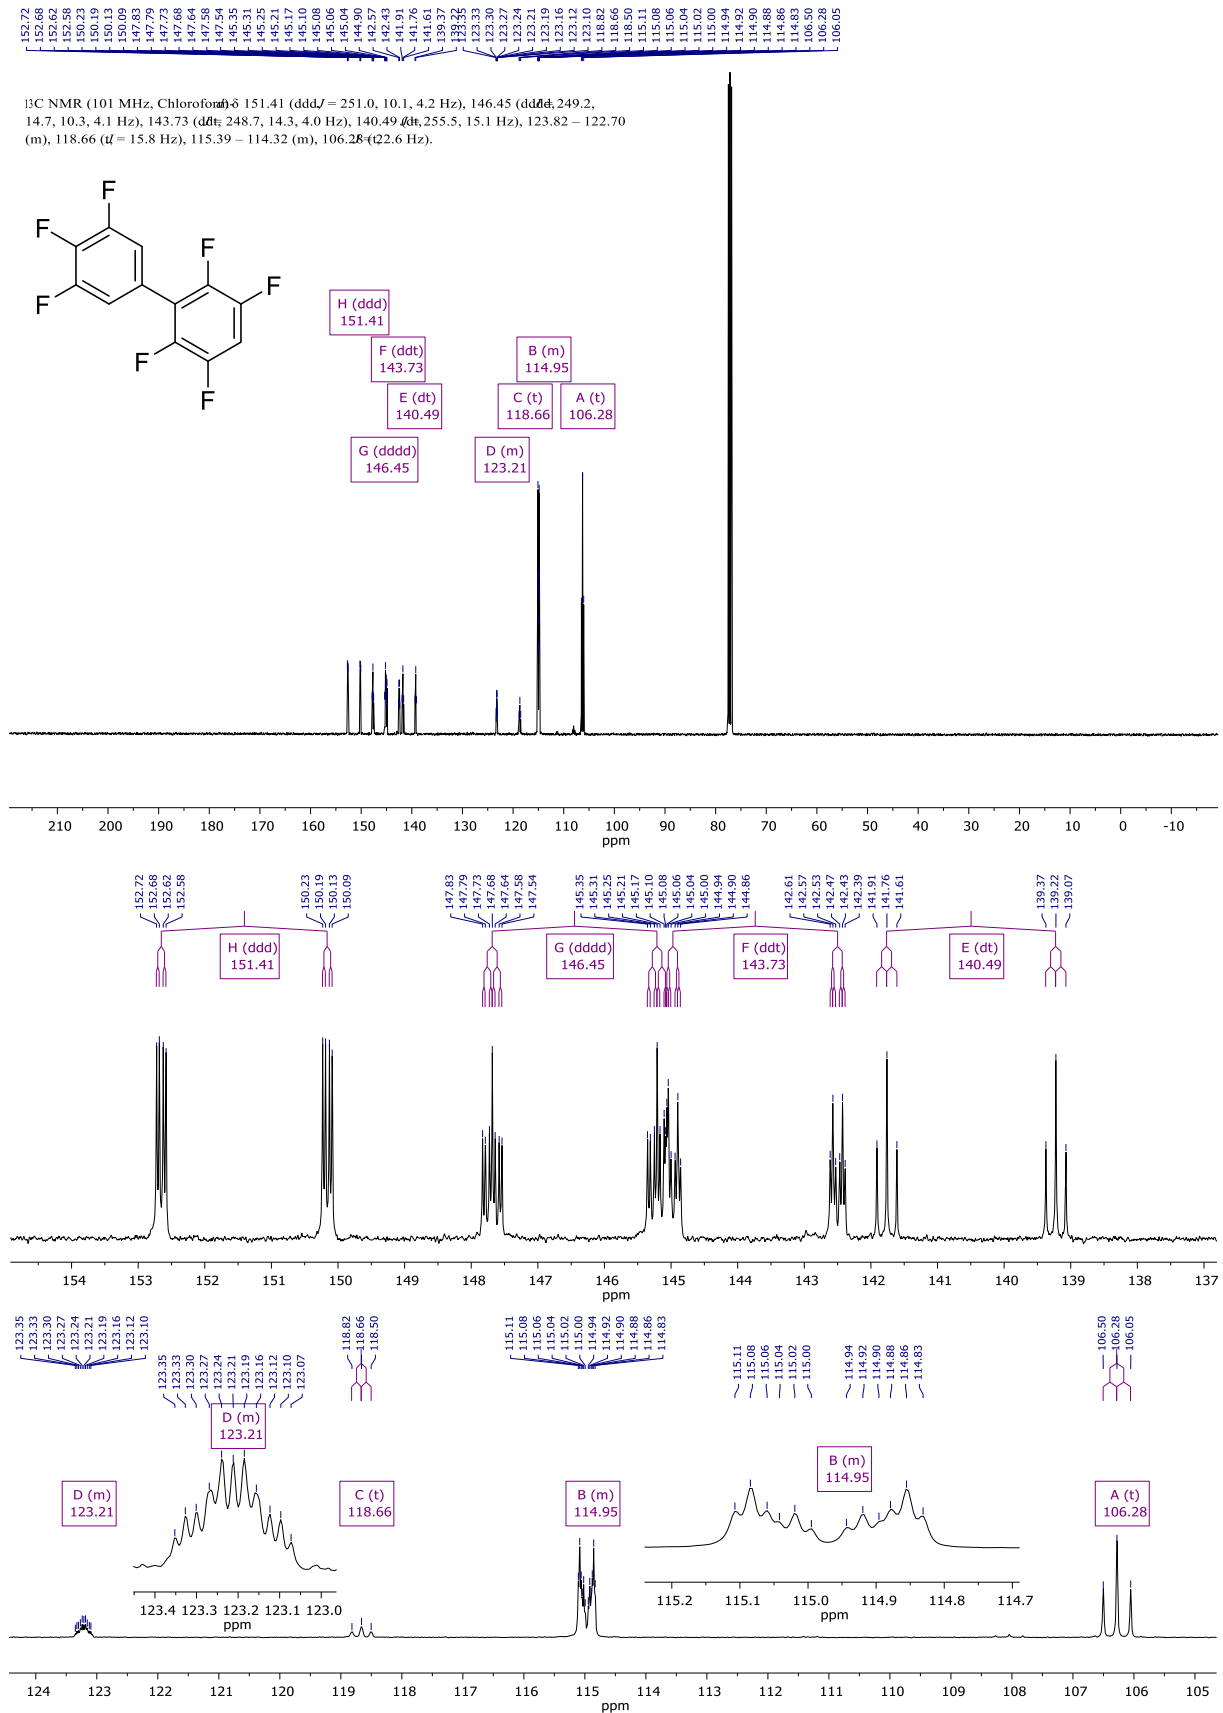Figure S4  $^{13}\text{C}$  NMR: 2,3,3',4',5,5',6-Heptafluoro-1,1'-biphenyl

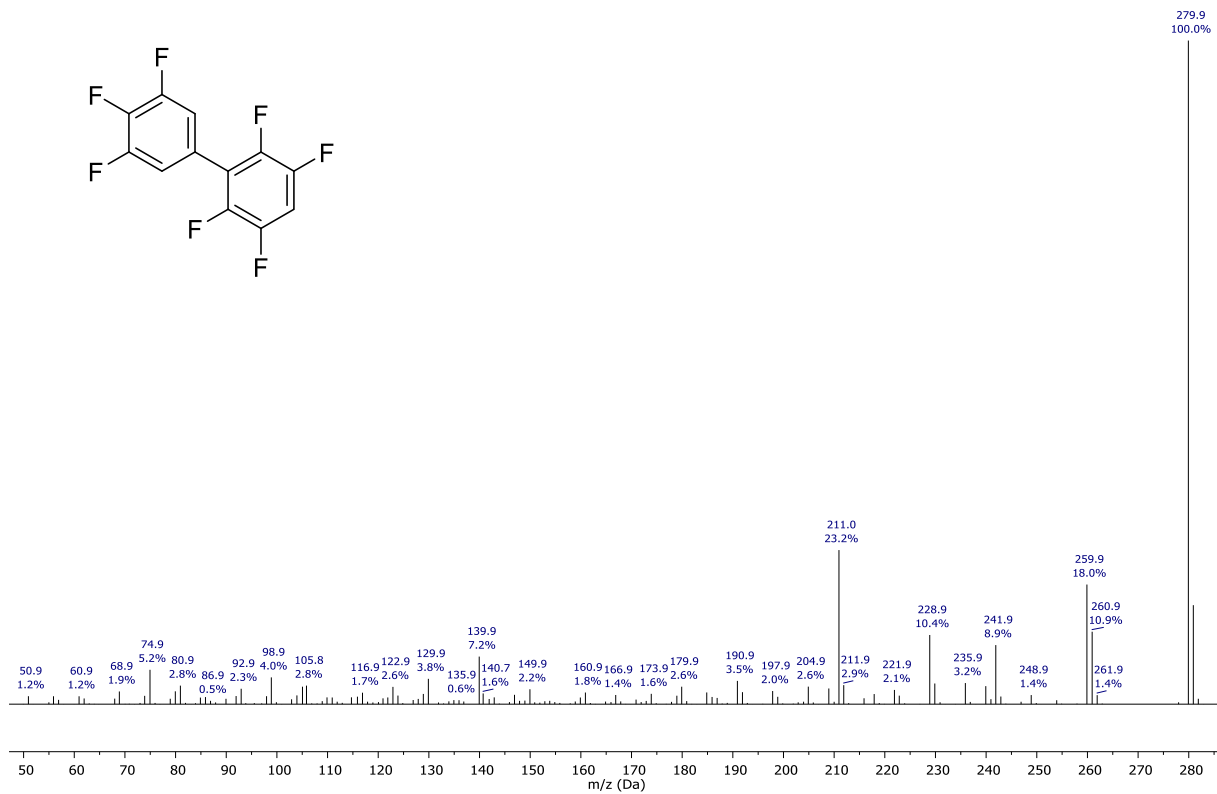Figure S5 EI-Spectrum (EI<sup>+</sup>): 2,3,3',4',5,5',6-Heptafluoro-1,1'-biphenyl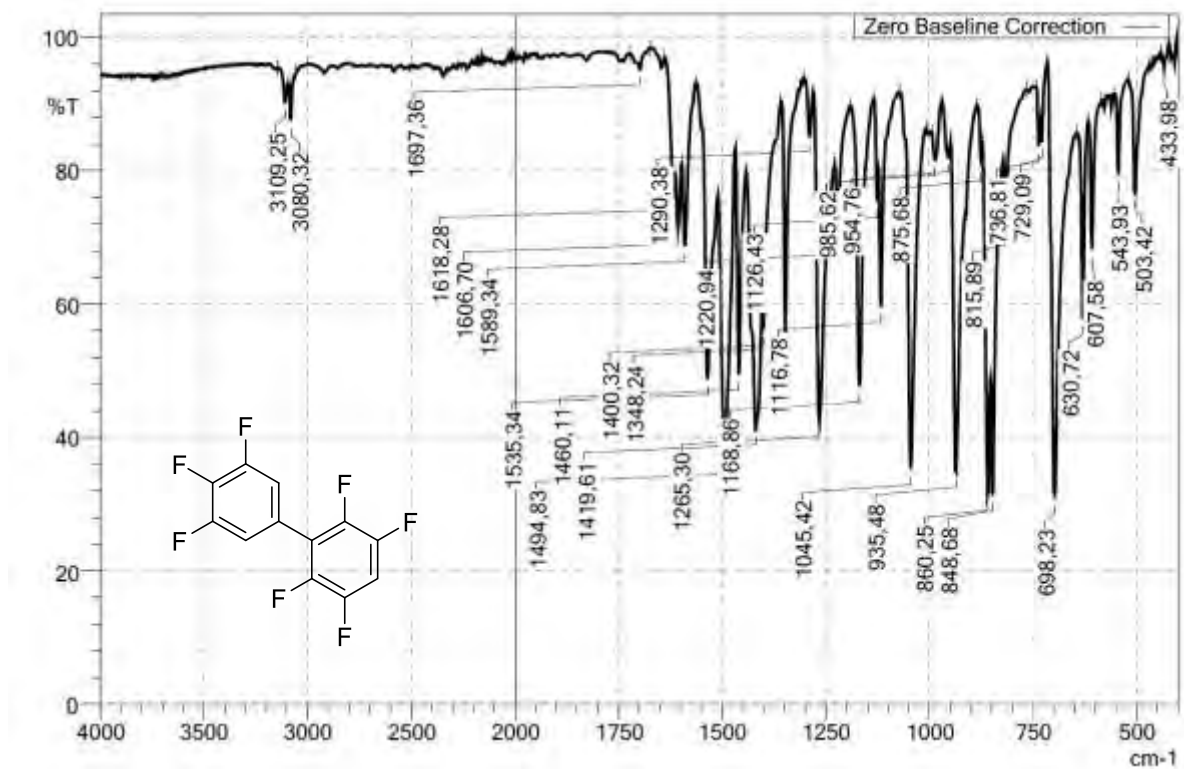

Figure S6 IR (ATR)-Spectrum: 2,3,3',4',5,5',6-Heptafluoro-1,1'-biphenyl

## 2,3,3',5,5',6-Hexafluoro-1,1'-biphenyl (10)

$^1\text{H NMR}$  (250 MHz, Chloroform- $d_3$ )  $\delta$  7.13 (tt,  $J = 9.7, 7.4$  Hz, 1H), 7.02 (ddd,  $J = 6.5, 2.3, 1.2$  Hz, 2H), 6.93 (tt,  $J = 8.9, 2.3$  Hz, 1H).

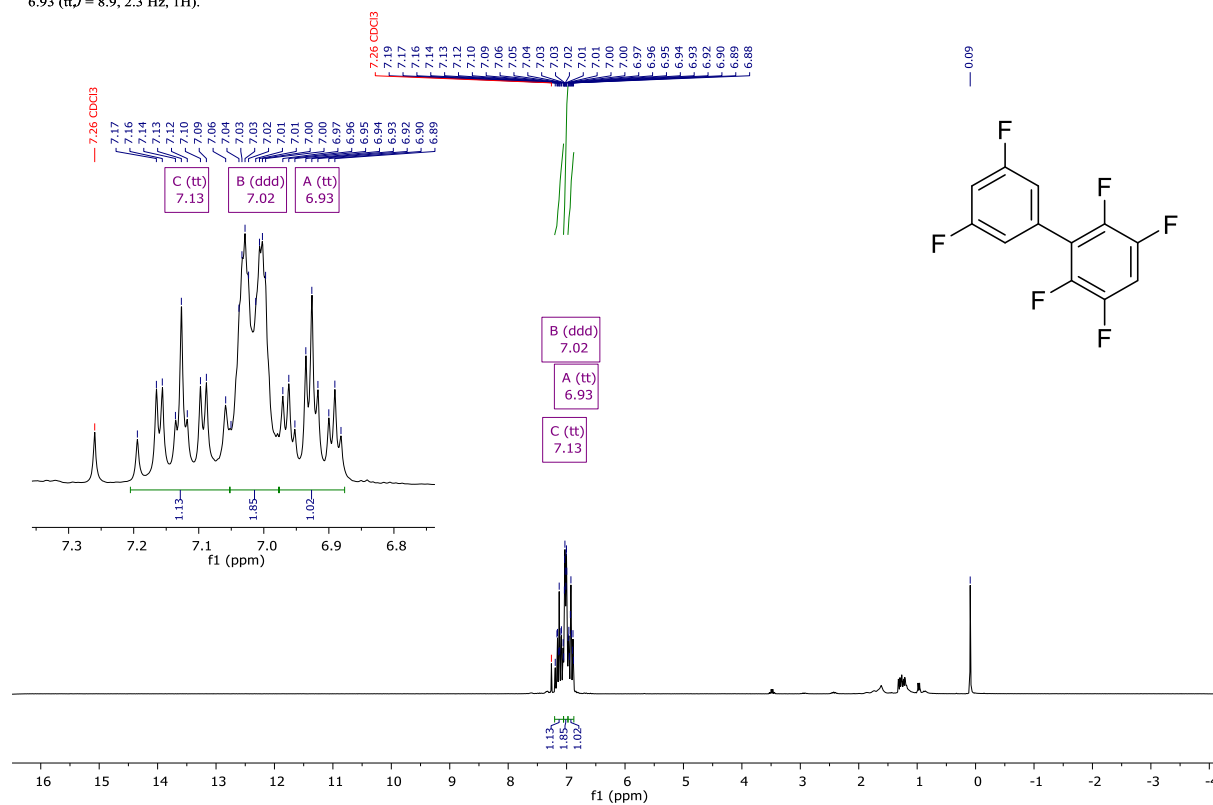

Figure S7  $^1\text{H NMR}$ : 2,3,3',5,5',6-Hexafluoro-1,1'-biphenyl

$^{19}\text{F NMR}$  (235 MHz, Chloroform- $d_3$ )  $\delta$  -108.98, -138.28 (dd,  $J = 21.8, 12.8$  Hz), -143.32 (dd,  $J = 21.9, 12.9$  Hz).

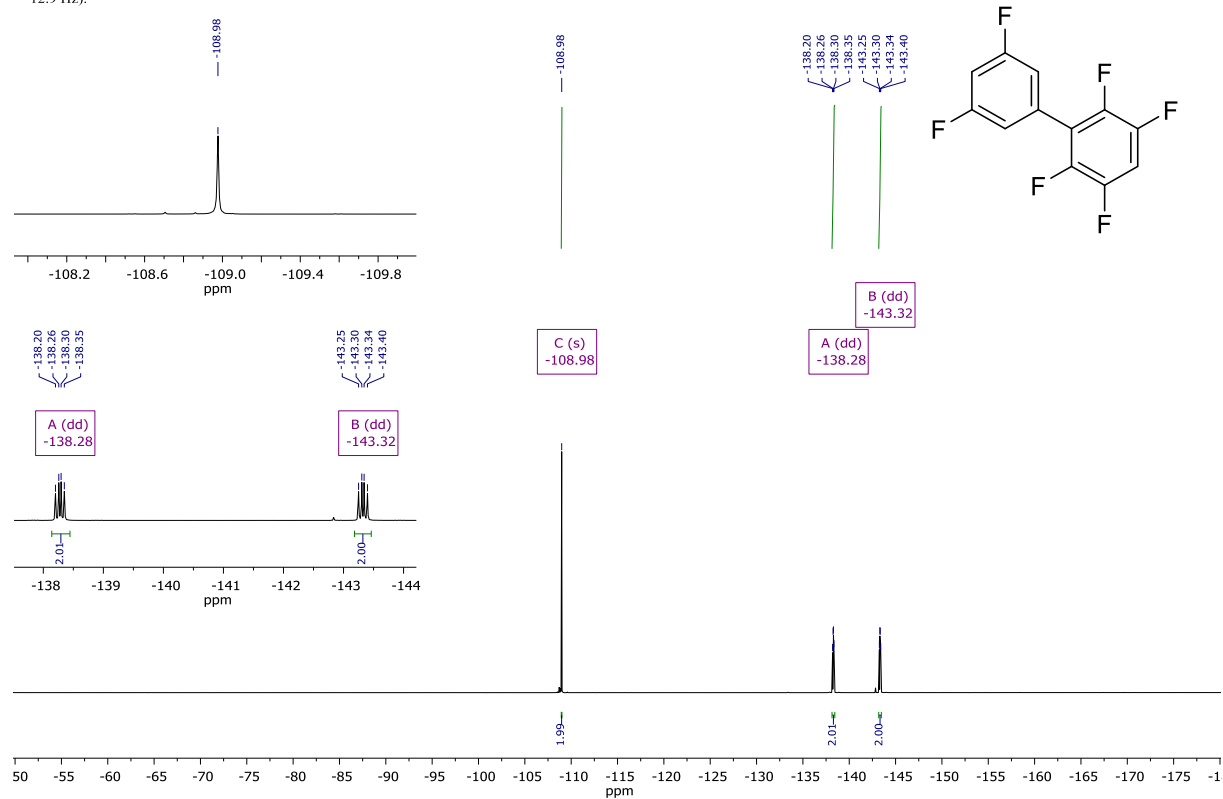

Figure S8  $^{19}\text{F NMR}$  ( $^1\text{H}$ ): 2,3,3',5,5',6-Hexafluoro-1,1'-biphenyl

$^{13}\text{C}$  NMR (101 MHz, Chloroform- $d_3$ )  $\delta$  163.04 (dd), 146.42 (ddd), 143.75 (dd), 142.63 (dd), 142.59 (dd), 142.48 (dd), 142.40 (dd), 142.39 (dd), 130.36 (dd), 130.34 (dd), 130.28 (dd), 130.26 (dd), 130.23 (dd), 130.15 (dd), 130.13 (dd), 119.57 (dd), 119.54 (dd), 119.52 (dd), 119.41 (dd), 119.39 (dd), 119.38 (dd), 119.25 (dd), 119.22 (dd), 119.20 (dd), 113.70 (dd), 113.68 (dd), 113.63 (dd), 113.58 (dd), 113.51 (dd), 113.49 (dd), 113.47 (dd), 113.44 (dd), 113.39 (dd), 113.38 (dd), 113.37 (dd), 113.36 (dd), 113.35 (dd), 113.34 (dd), 113.33 (dd), 113.32 (dd), 113.31 (dd), 113.30 (dd), 113.29 (dd), 113.28 (dd), 113.27 (dd), 113.26 (dd), 113.25 (dd), 113.24 (dd), 113.23 (dd), 113.22 (dd), 113.21 (dd), 113.20 (dd), 113.19 (dd), 113.18 (dd), 113.17 (dd), 113.16 (dd), 113.15 (dd), 113.14 (dd), 113.13 (dd), 113.12 (dd), 113.11 (dd), 113.10 (dd), 113.09 (dd), 113.08 (dd), 113.07 (dd), 113.06 (dd), 113.05 (dd), 113.04 (dd), 113.03 (dd), 113.02 (dd), 113.01 (dd), 113.00 (dd), 106.11 (dd), 105.89 (dd), 105.24 (dd), 104.99 (dd), 104.74 (dd).

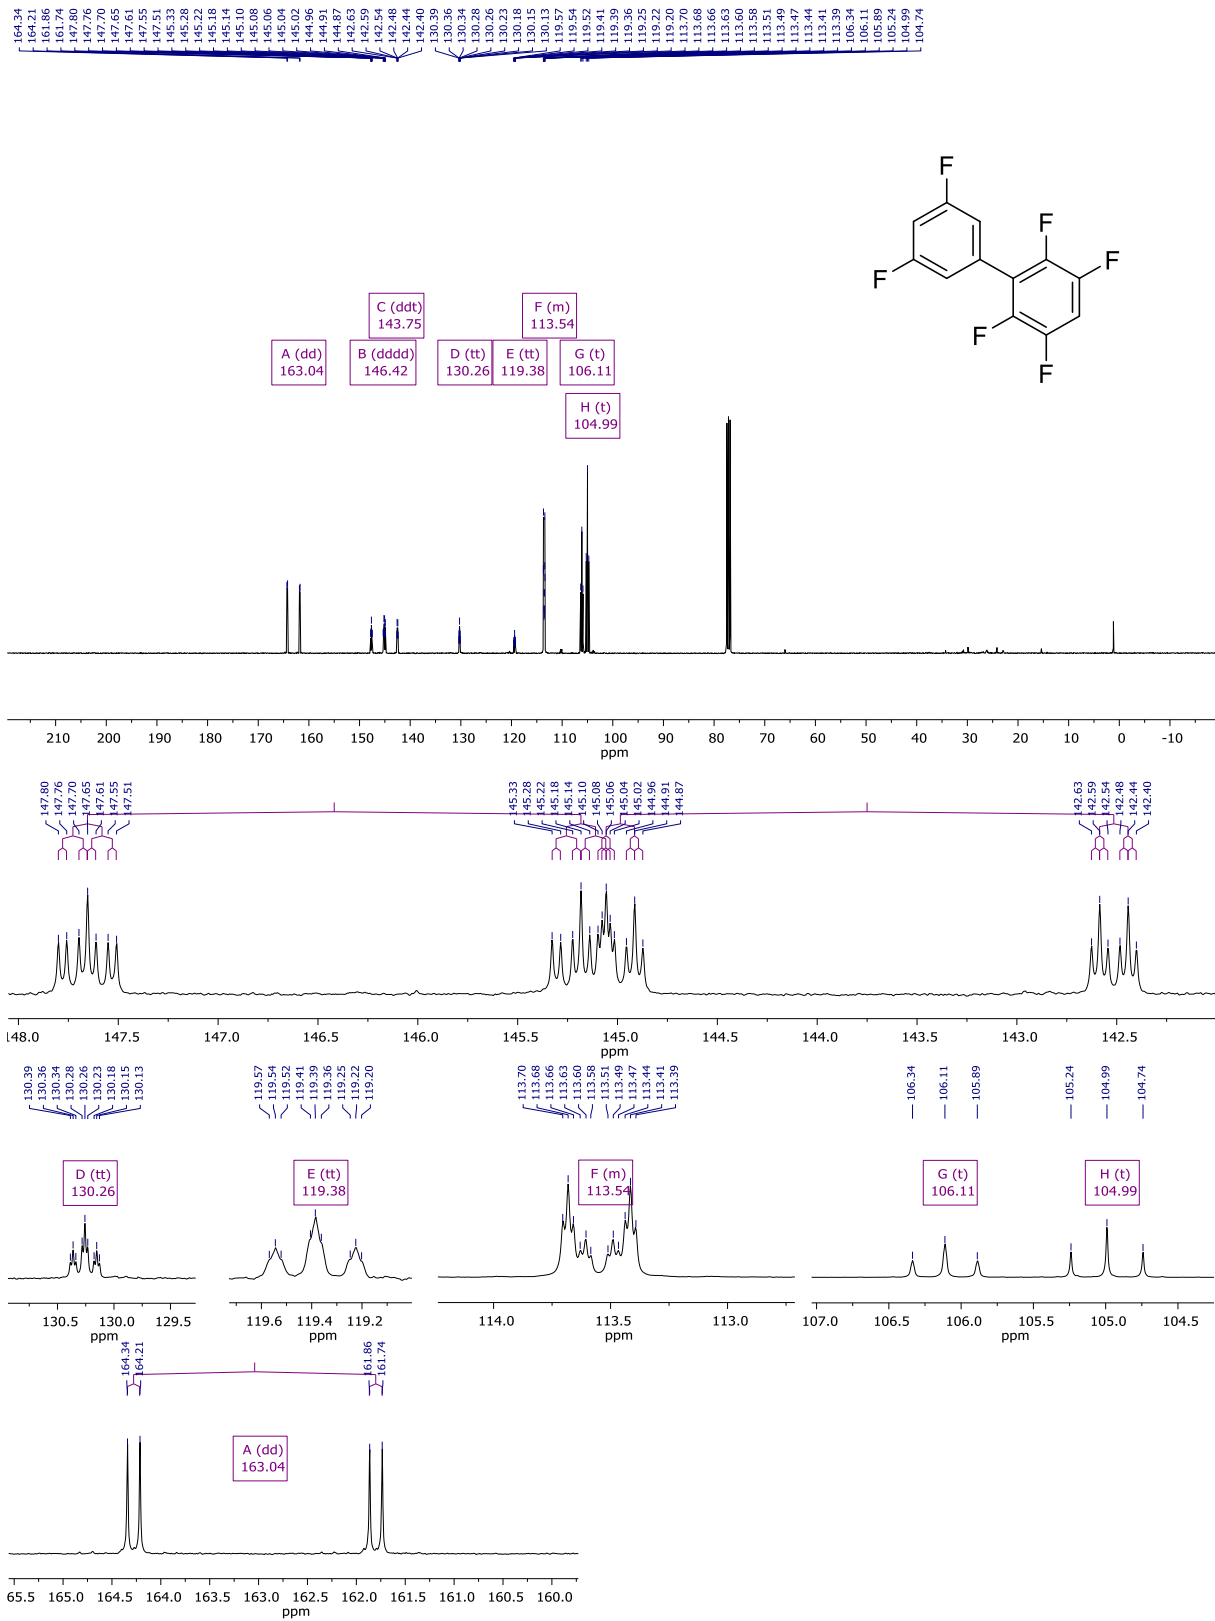

Figure S9  $^{13}\text{C}$  NMR: 2,3,3',5',6-hexafluoro-1,1'-biphenyl

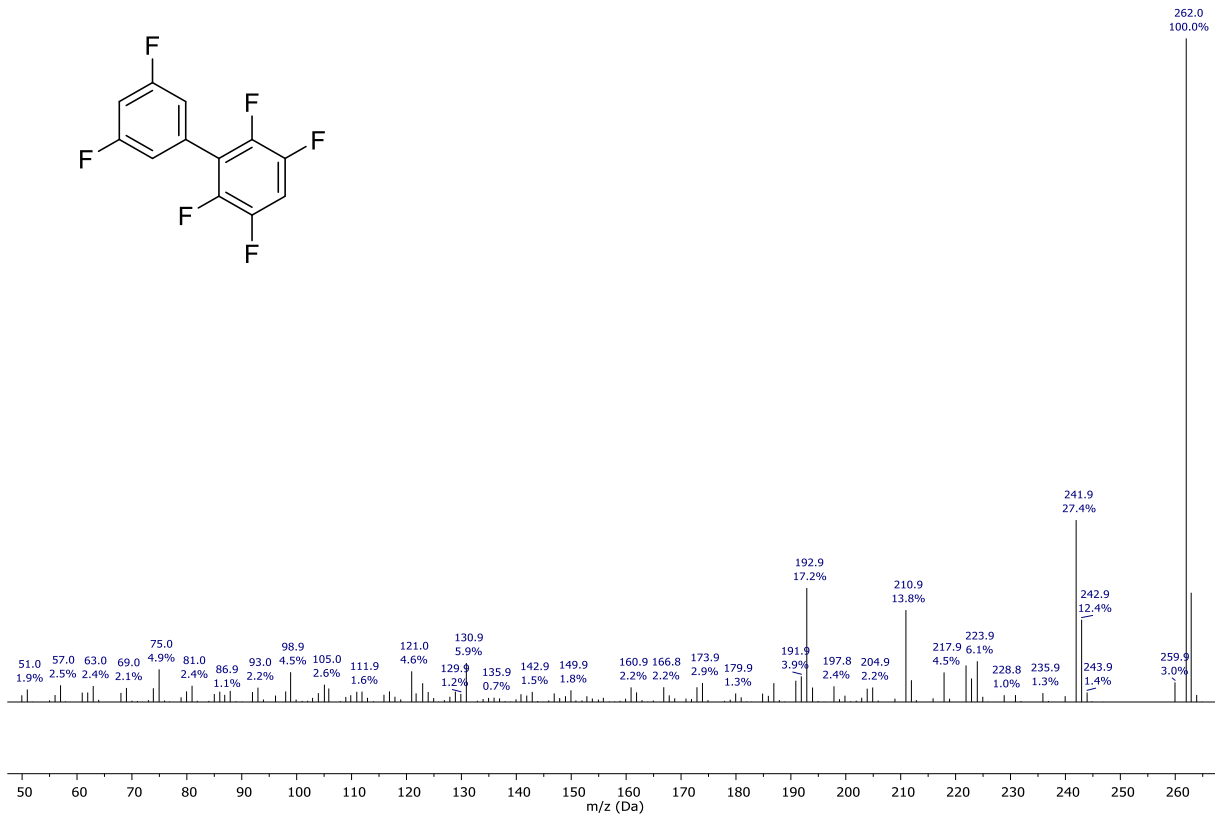Figure S10 EI-Spectrum (EI<sup>+</sup>): 2,3,3',5,5',6-Hexafluoro-1,1'-biphenyl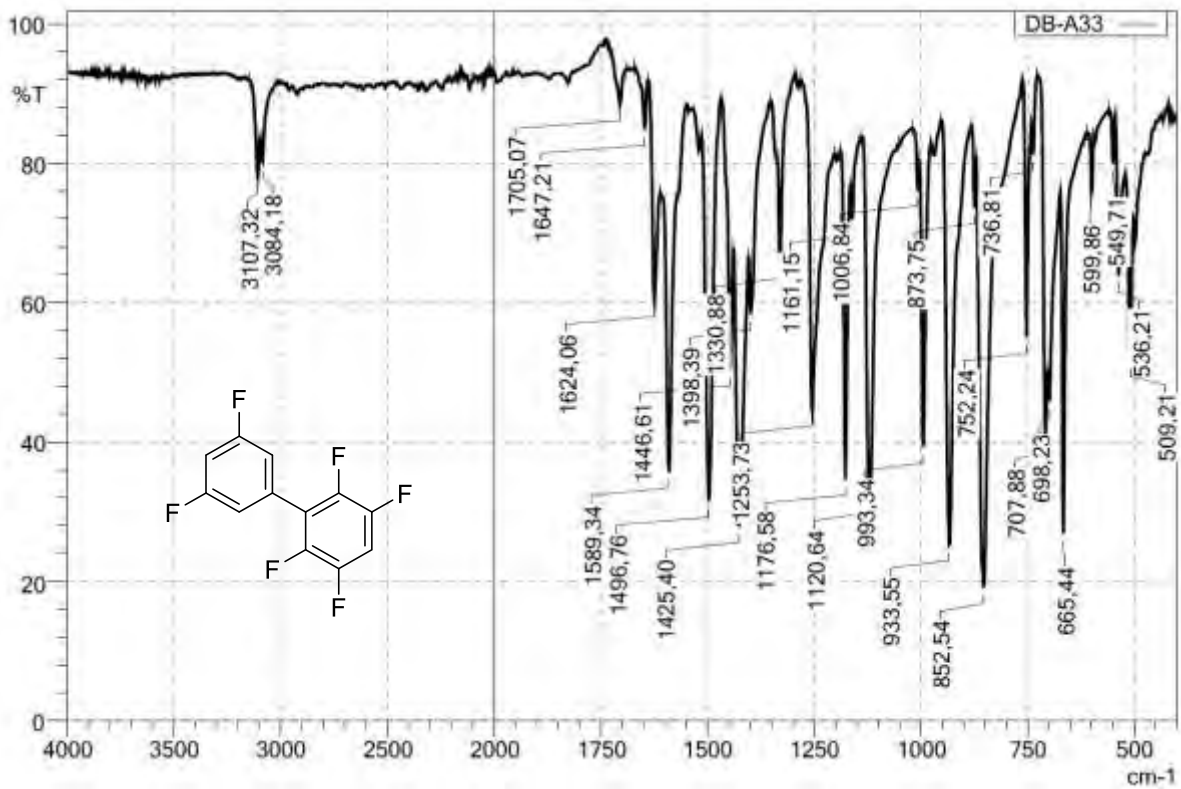

Figure S11 IR (ATR)-Spectrum: 2,3,3',5,5',6-Hexafluoro-1,1'-biphenyl

## 2,2',3,4',5,5',6-Heptafluoro-1,1'-biphenyl (11)

<sup>1</sup>H NMR (250 MHz, Chloroform-d) δ 7.62 – 6.90 (m, 1H).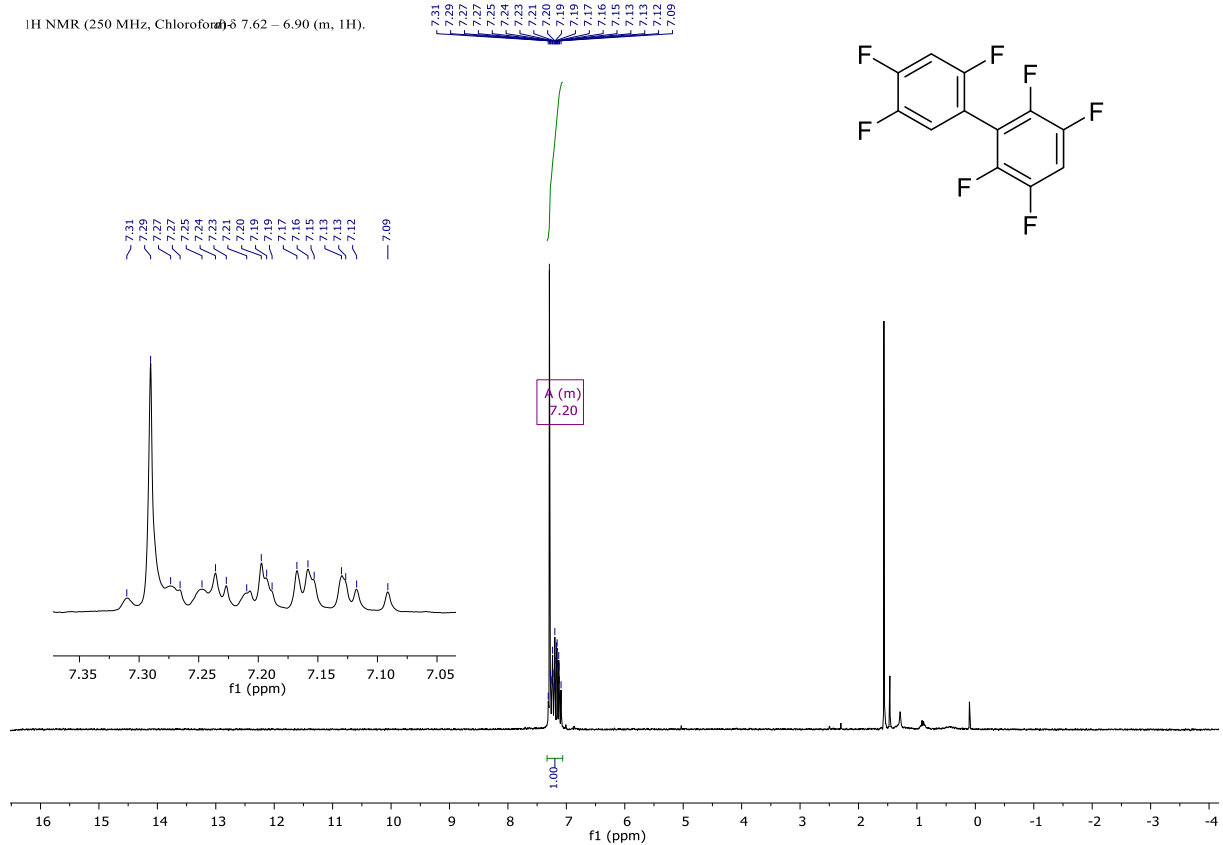Figure S12 <sup>1</sup>H-NMR: 2,2',3,4',5,5',6-Heptafluoro-1,1'-biphenyl<sup>19</sup>F NMR (235 MHz, Chloroform-d) δ -113.47 (dtd, J = 14.5, 11.0, 5.5 Hz), -130.09 (dd, 21.5, 5.5 Hz), -137.77 – -138.54 (m), -140.60 – -140.98 (m), -141.61 (dd, 5, 14.5 Hz).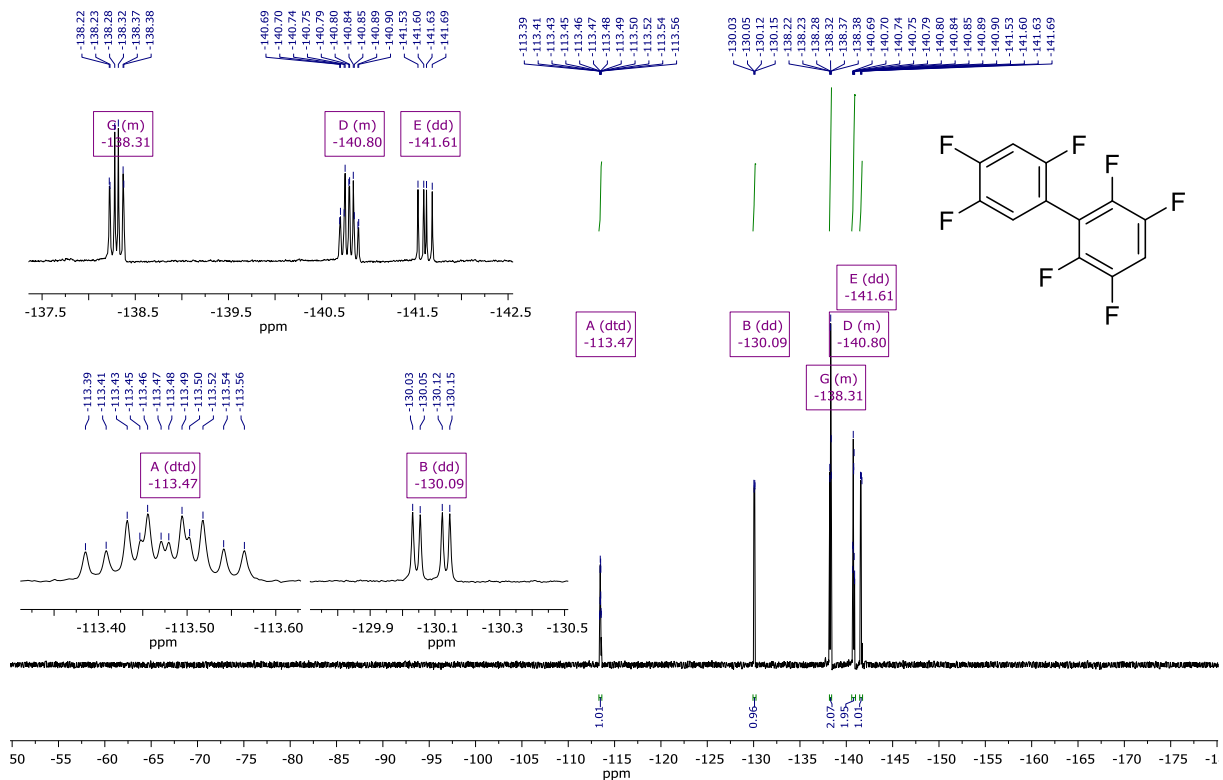Figure S13 <sup>19</sup>F-NMR {<sup>1</sup>H}: 2,2',3,4',5,5',6-Heptafluoro-1,1'-biphenyl

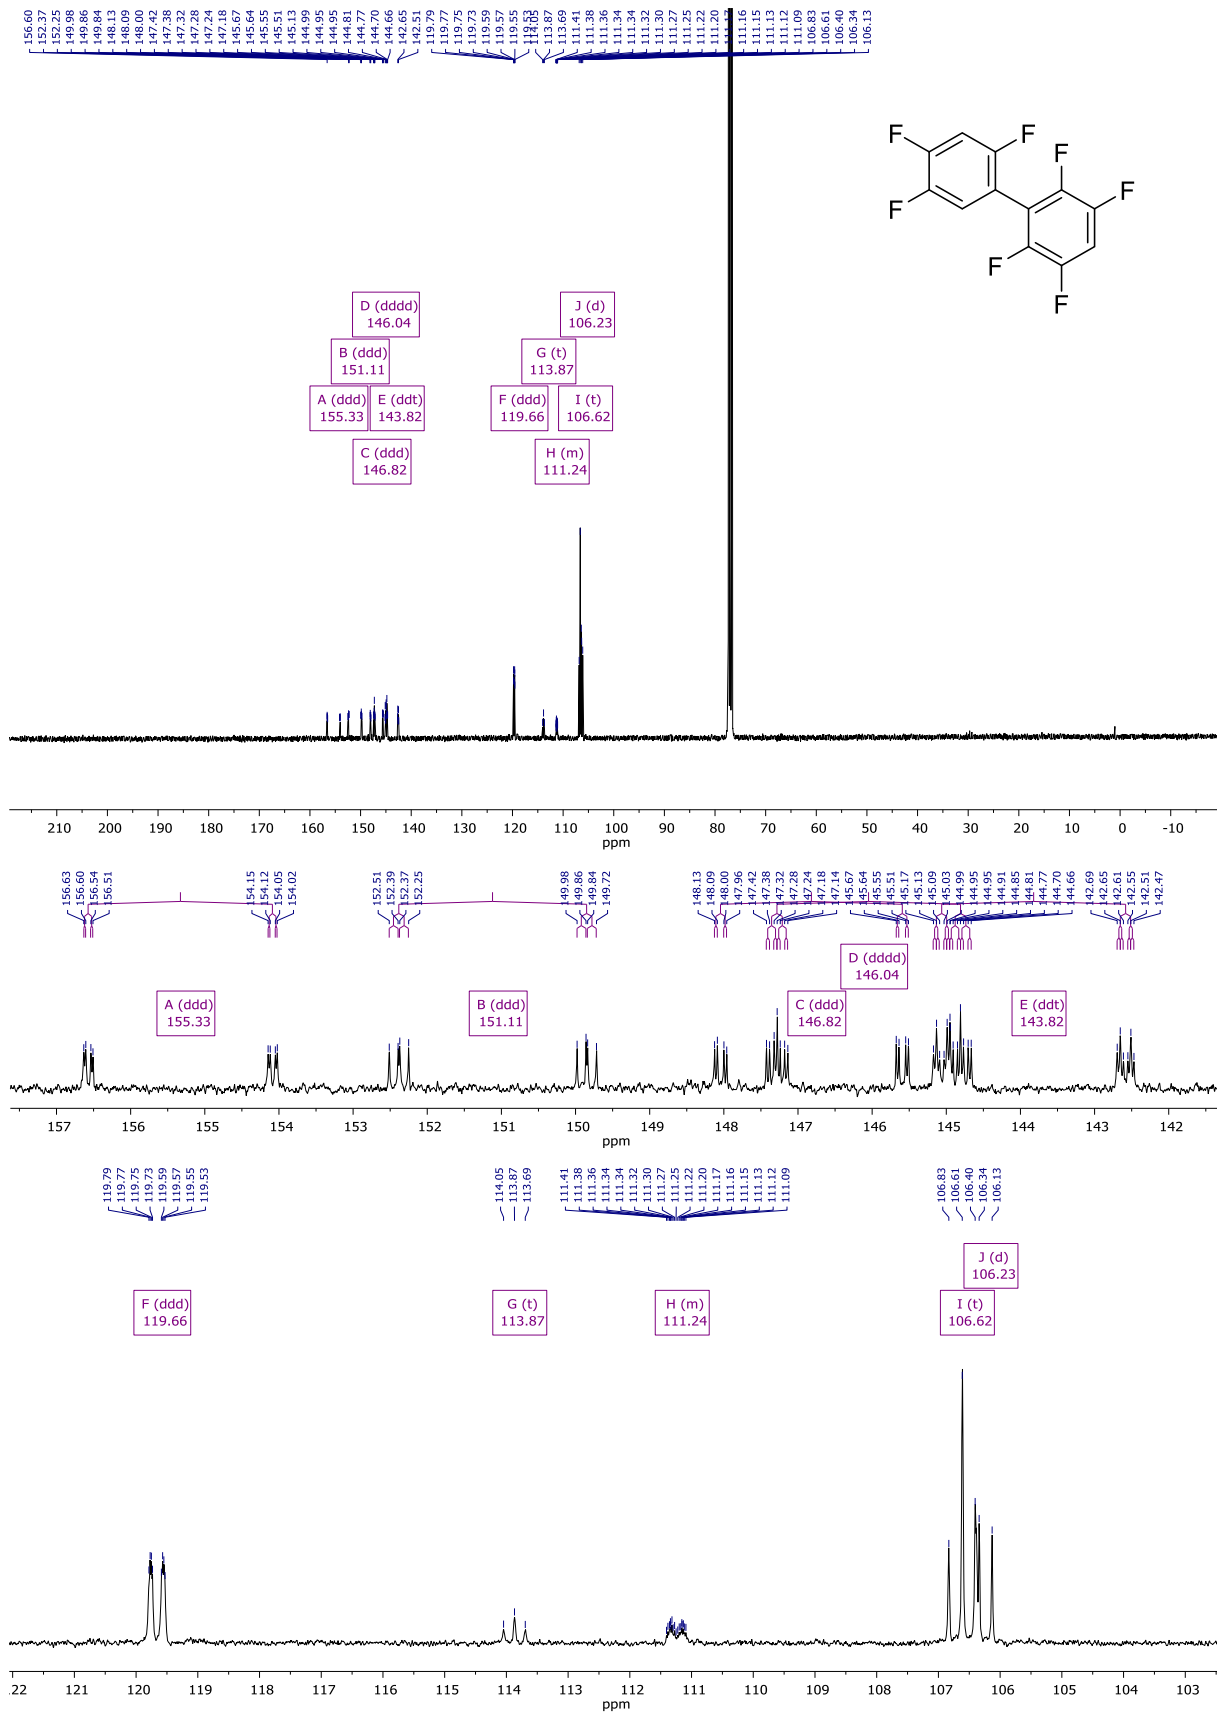Figure S14<sup>13</sup>C NMR: 2,2',3,4',5,5',6-Heptafluoro-1,1'-biphenyl



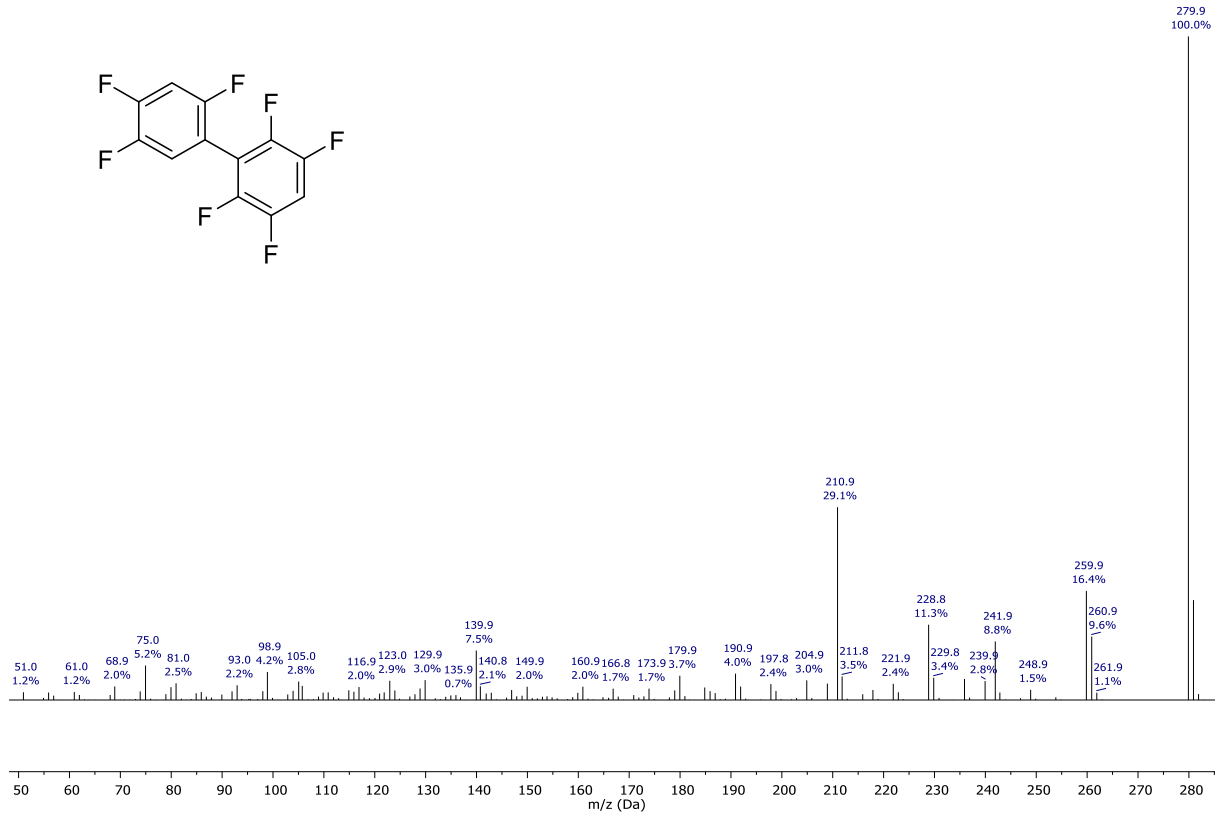Figure S15 EI-Spectrum (EI<sup>+</sup>): 2,2',3,4',5,5',6-Heptafluoro-1,1'-biphenyl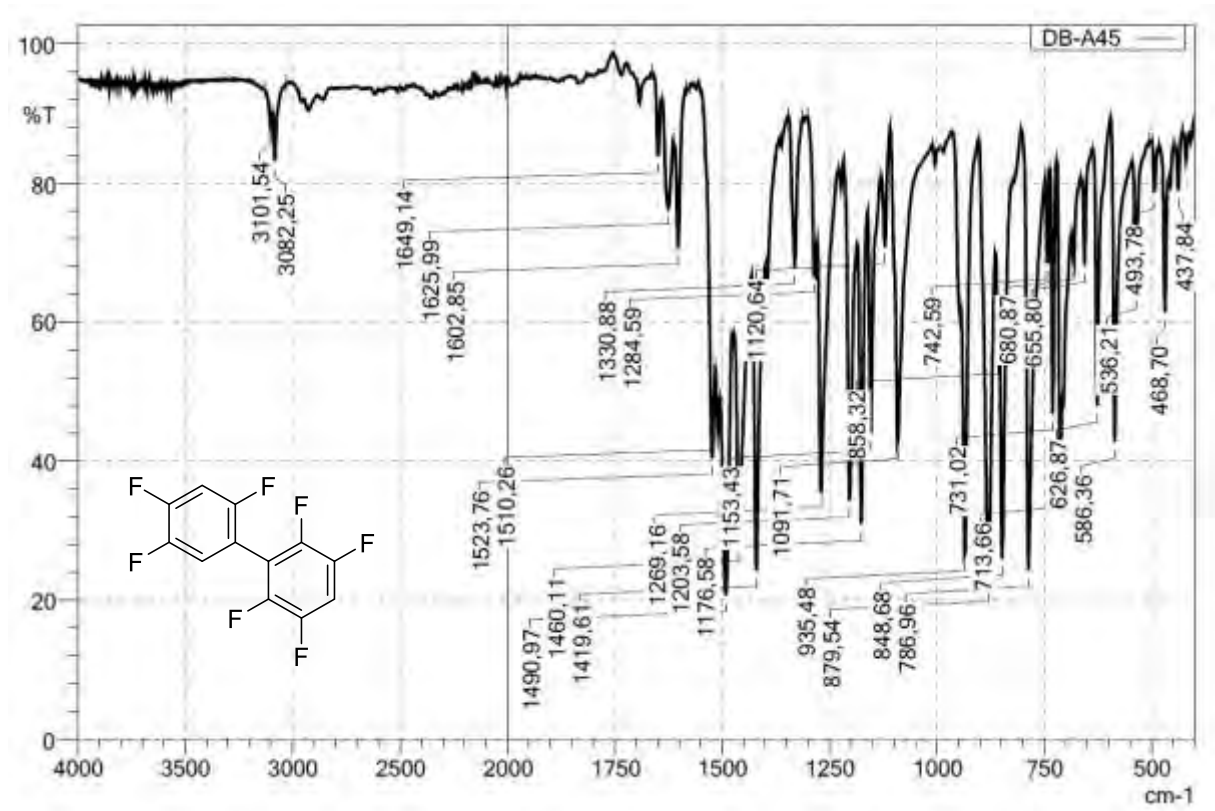

Figure S16 IR (ATR)-Spectrum: 2,2',3,4',5,5',6-Heptafluoro-1,1'-biphenyl

## 2,2',3,3',4,5',6'-Heptafluoro-1,1'-biphenyl (12)

<sup>1</sup>H NMR (250 MHz, Chloroform-d) δ 7.25 – 7.05 (m, 3H).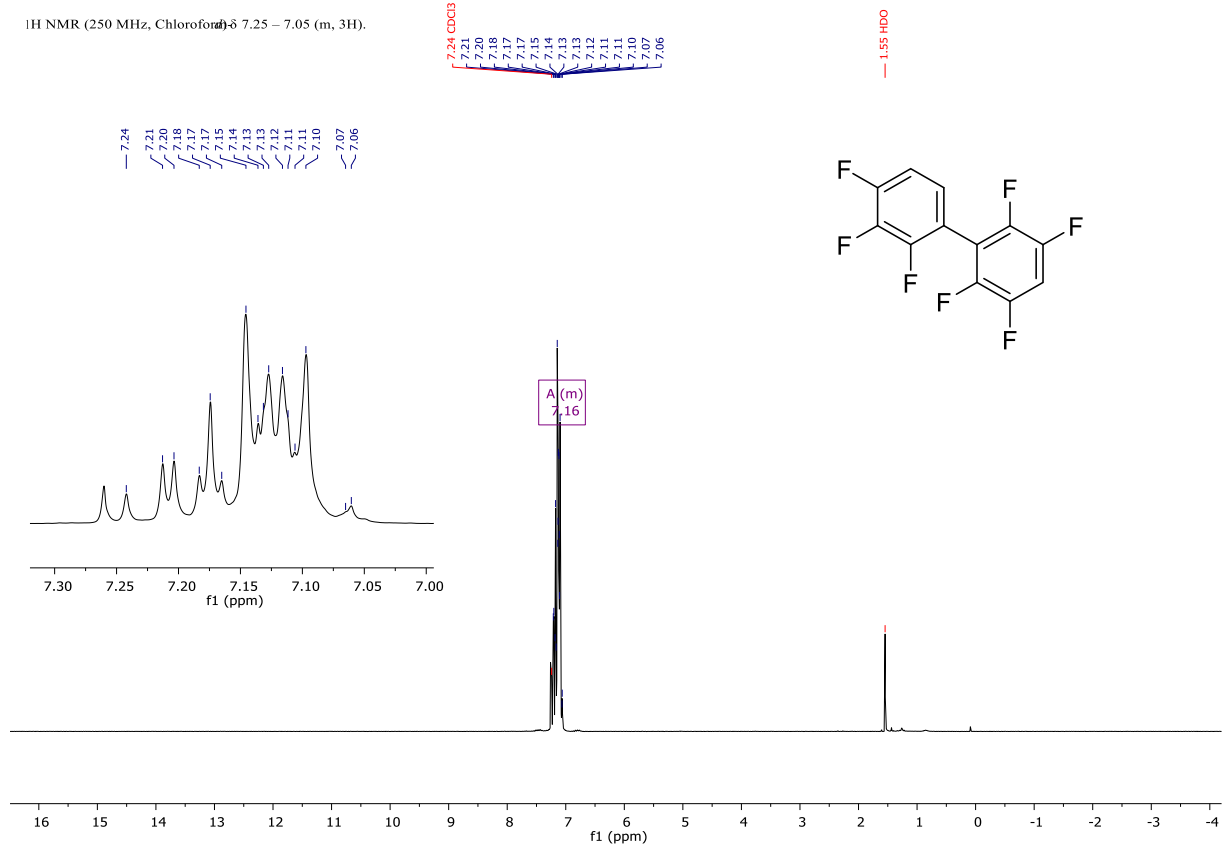Figure S17 <sup>1</sup>H-NMR: 2,2',3,3',4,5',6'-Heptafluoro-1,1'-biphenyl<sup>19</sup>F NMR (235 MHz, Chloroform-d) δ -131.43 (dd, J = 20.6, 9.2 Hz), -132.14 (ddd, J = 19.9, 10.4 Hz), -138.30 – -138.52 (m), -140.81 – -141.09 (m), -158.82 (t, J = 10.4 Hz).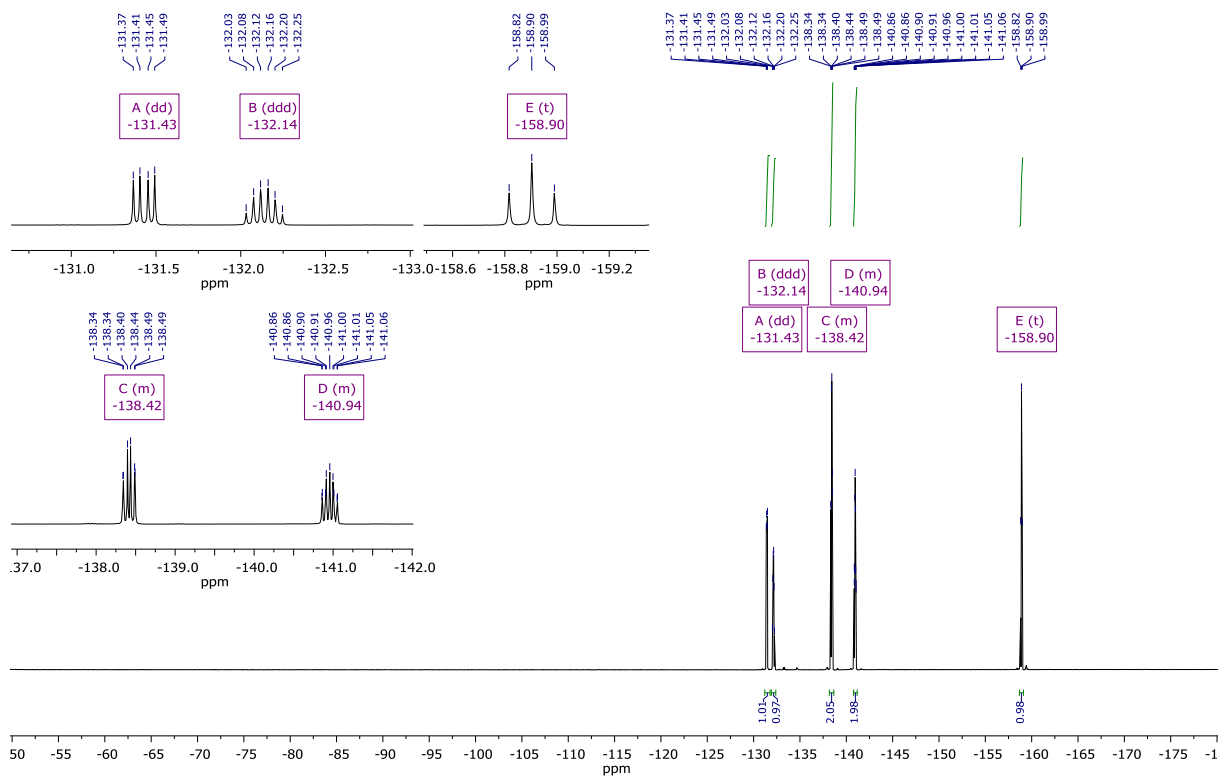Figure S18 <sup>19</sup>F-NMR {<sup>1</sup>H}: 2,2',3,3',4,5',6'-Heptafluoro-1,1'-biphenyl

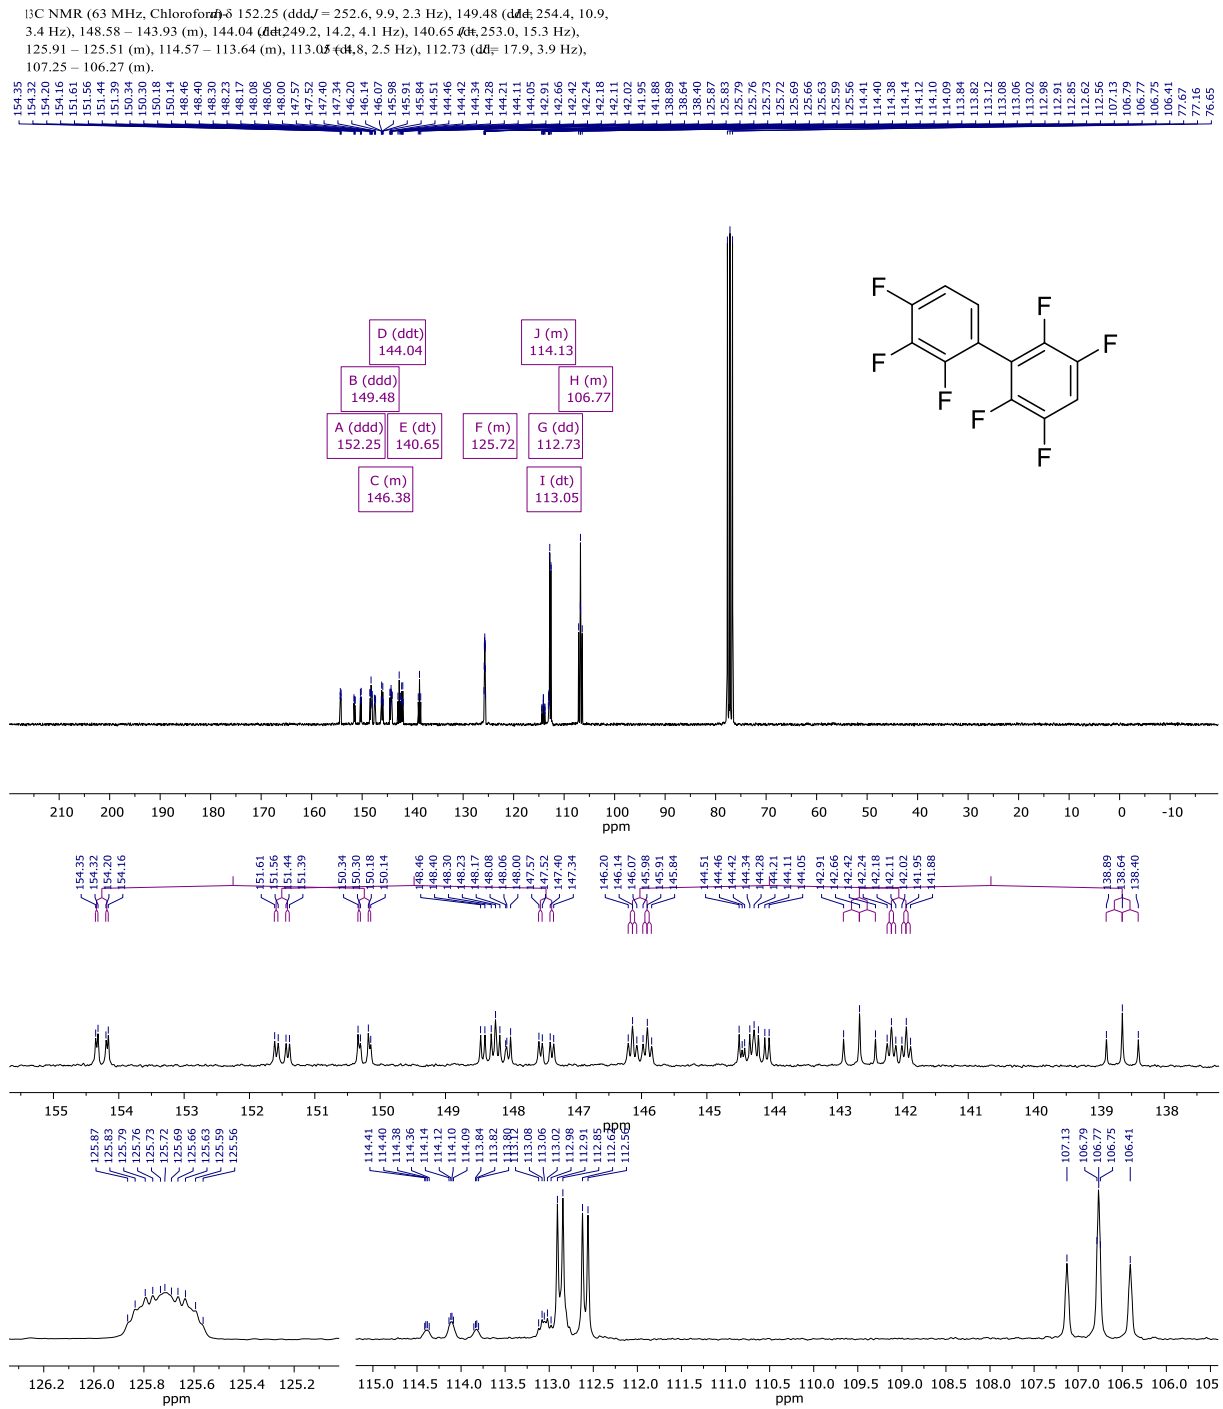Figure S19  $^{13}\text{C}$  NMR: 2,2',3,3',4,5',6'-Heptafluoro-1,1'-biphenyl

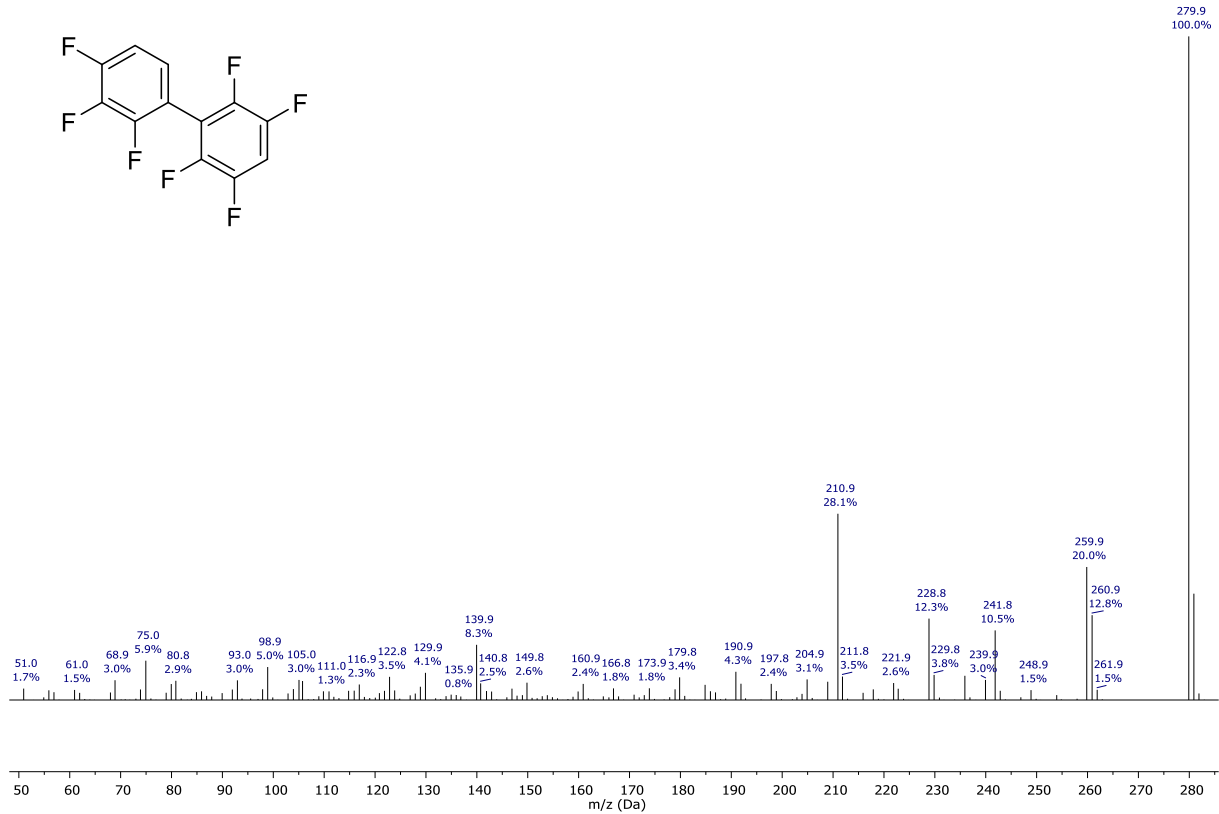Figure S20 EI-Spectrum (EI<sup>+</sup>): 2,2',3,3',4,5',6'-Heptafluoro-1,1'-biphenyl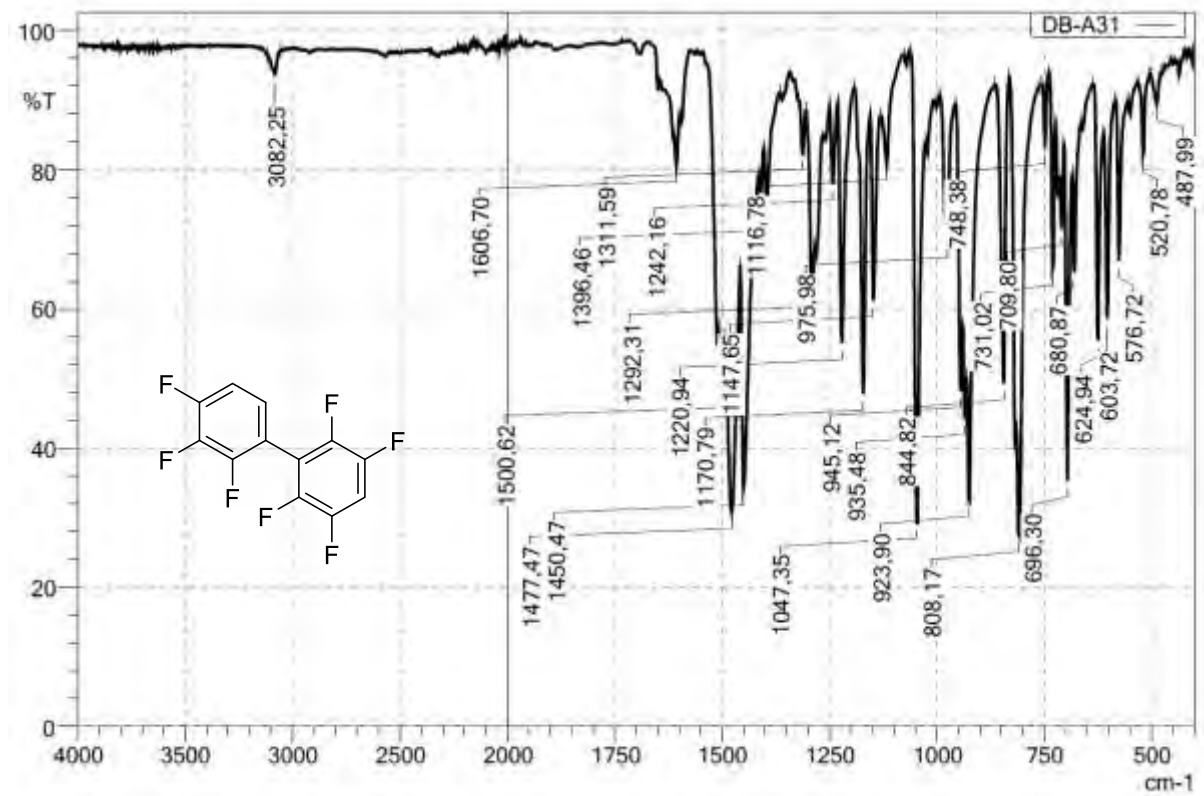

Figure S21 IR (ATR)-Spectrum: 2,2',3,3',4,5',6'-Heptafluoro-1,1'-biphenyl

## 2,2',3,3',5,5',6,6'-Octafluoro-1,1'-biphenyl (13)

 $^1\text{H NMR}$  (250 MHz, Chloroform- $d_3$ )  $\delta$  7.36 – 7.15 (m, 1H).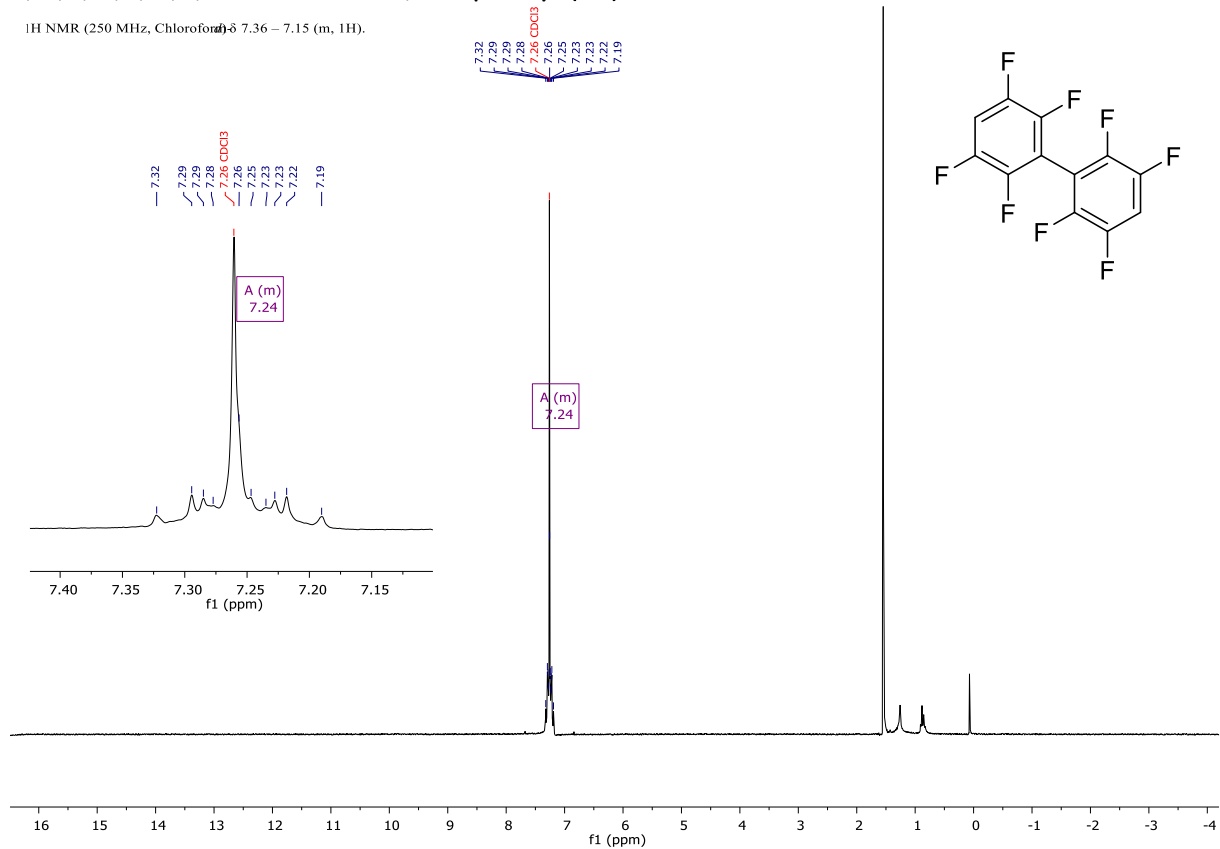Figure S22  $^1\text{H-NMR}$ : 2,2',3,3',5,5',6,6'-Octafluoro-1,1'-biphenyl $^{19}\text{F NMR}$  (377 MHz, Chloroform- $d_3$ )  $\delta$  -137.66 – -137.85 (m, 4F), -138.20 – -138.42 (m, 4F).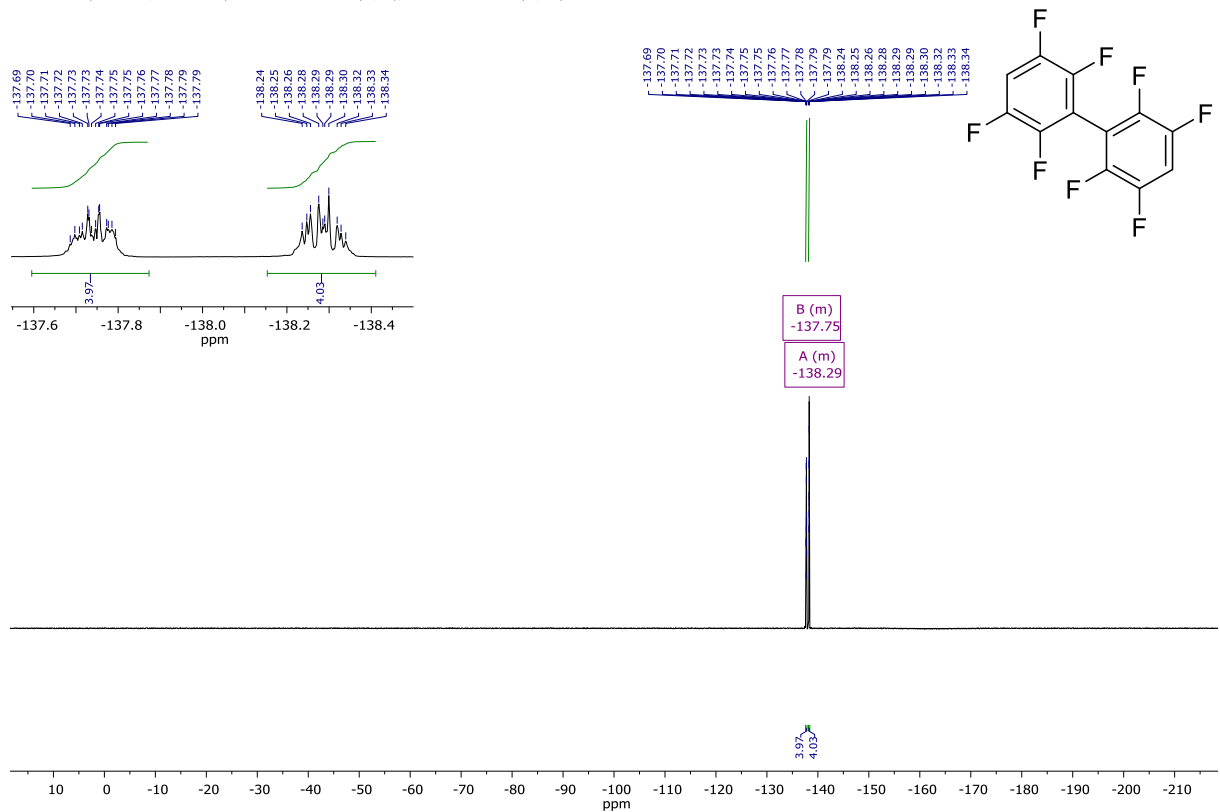Figure S23  $^{19}\text{F-NMR}$   $\{^1\text{H}\}$ : 2,2',3,3',5,5',6,6'-Octafluoro-1,1'-biphenyl

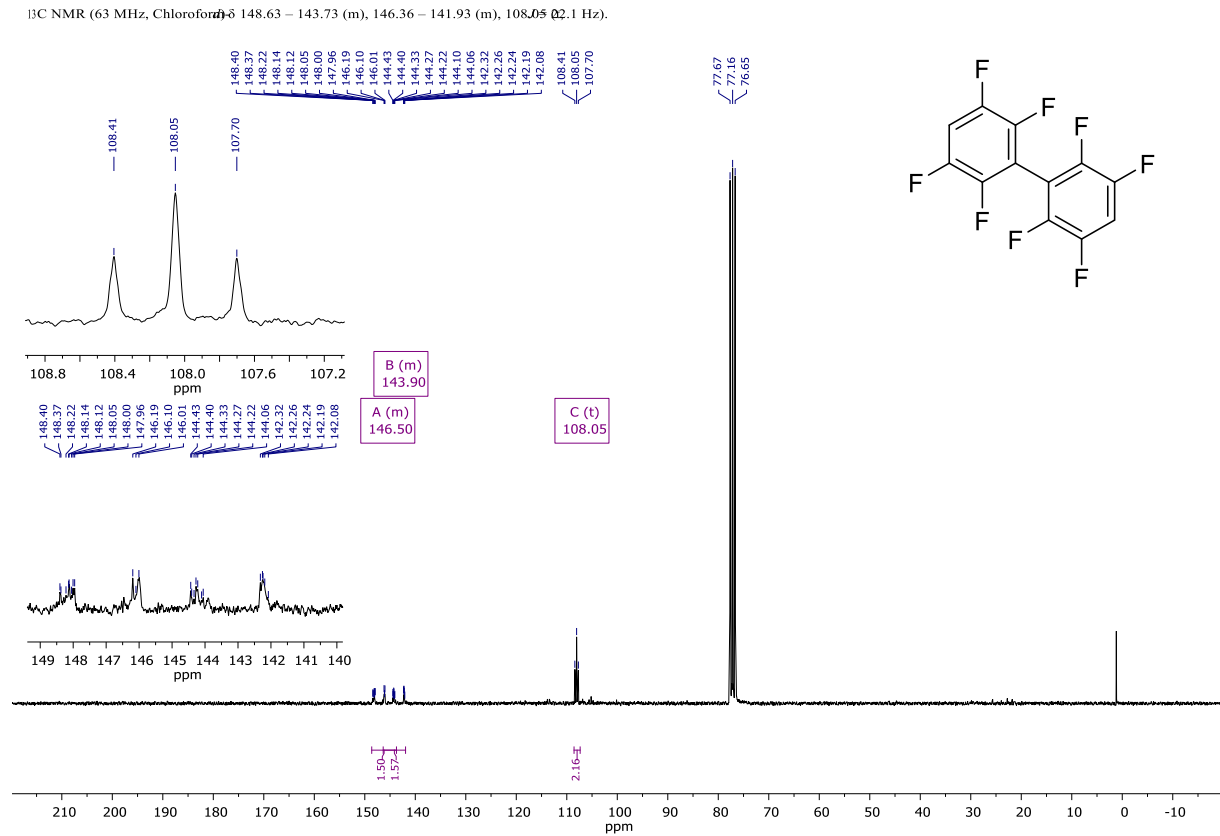Figure S24  $^{13}\text{C}$  NMR: 2,2',3,3',5,5',6,6'-Octafluoro-1,1'-biphenyl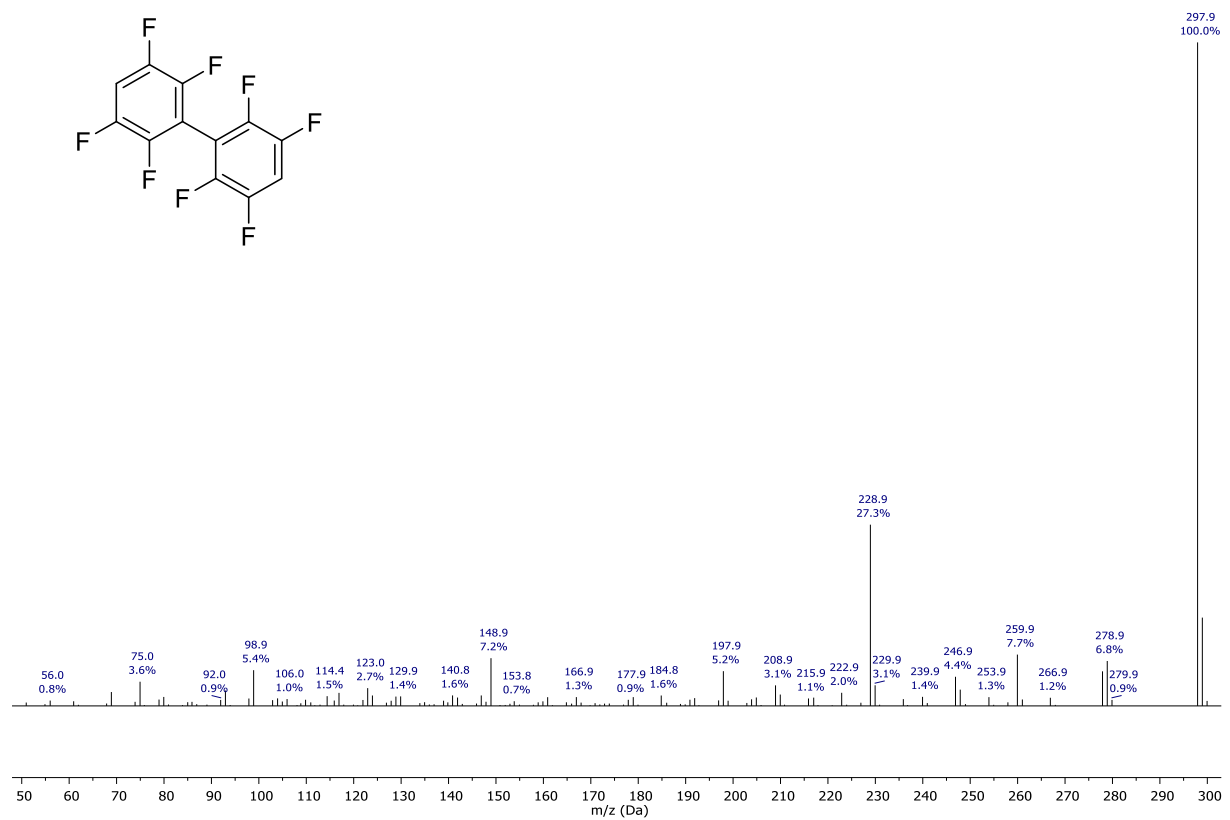Figure S25 EI-Spectrum (EI $^+$ ): 2,2',3,3',5,5',6,6'-Octafluoro-1,1'-biphenyl

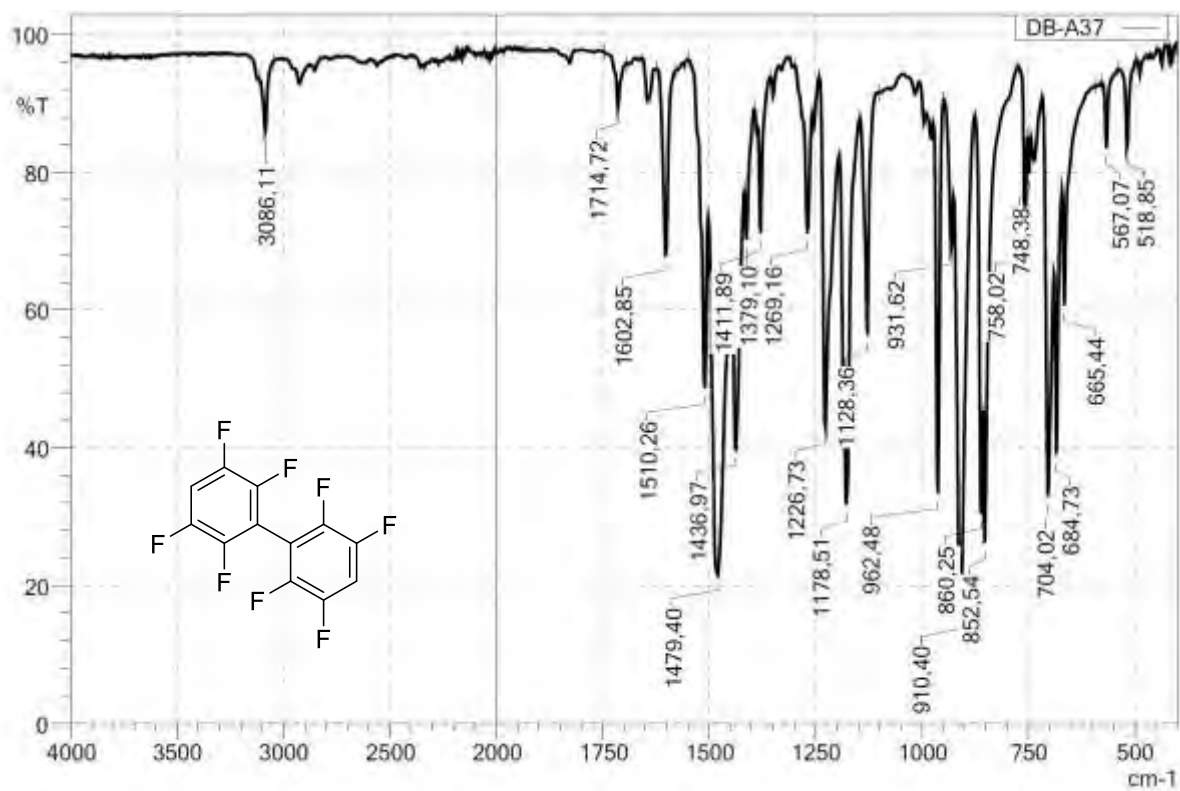

Figure S26 IR (ATR)- Spectrum: 2,2',3,3',5,5',6,6'-Octafluoro-1,1'-biphenyl





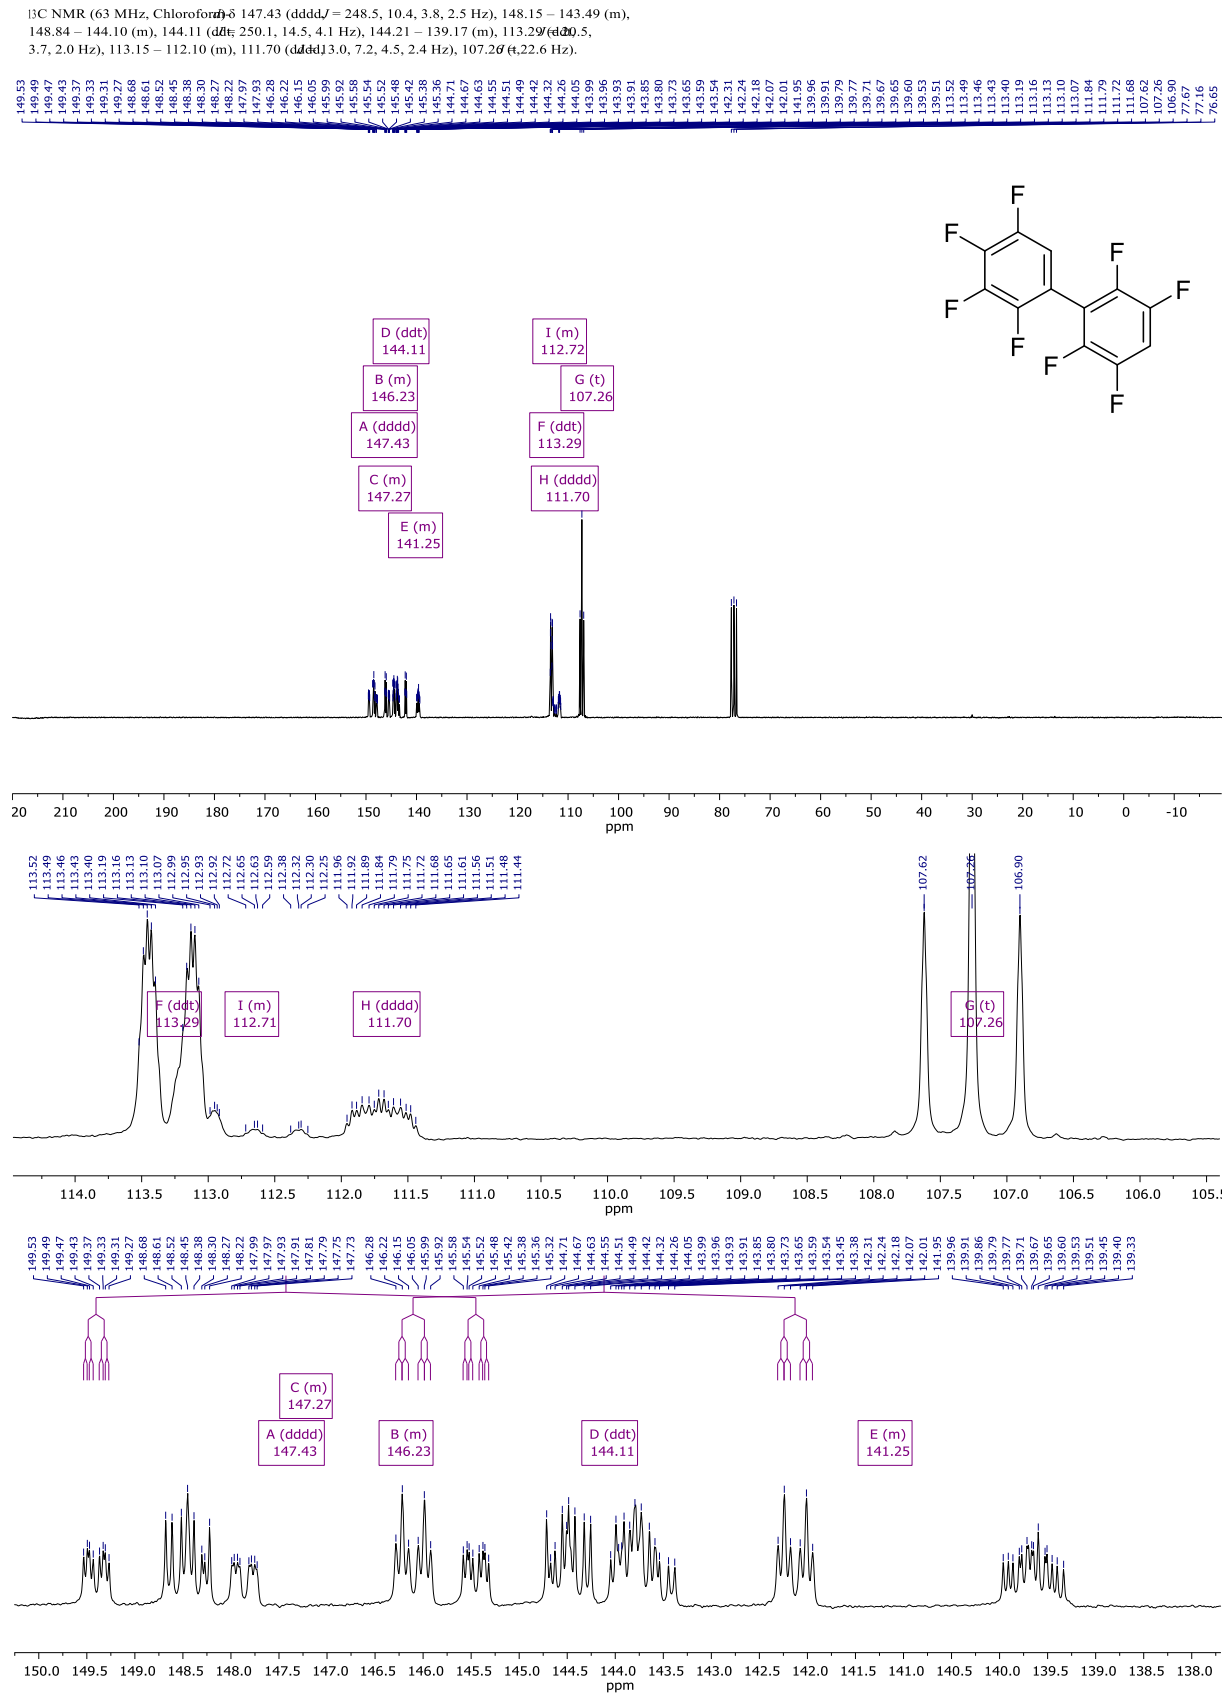Figure S29  $^{13}\text{C}$  NMR: 2,2',3,3',4,5,5',6'-Octafluoro-1,1'-biphenyl

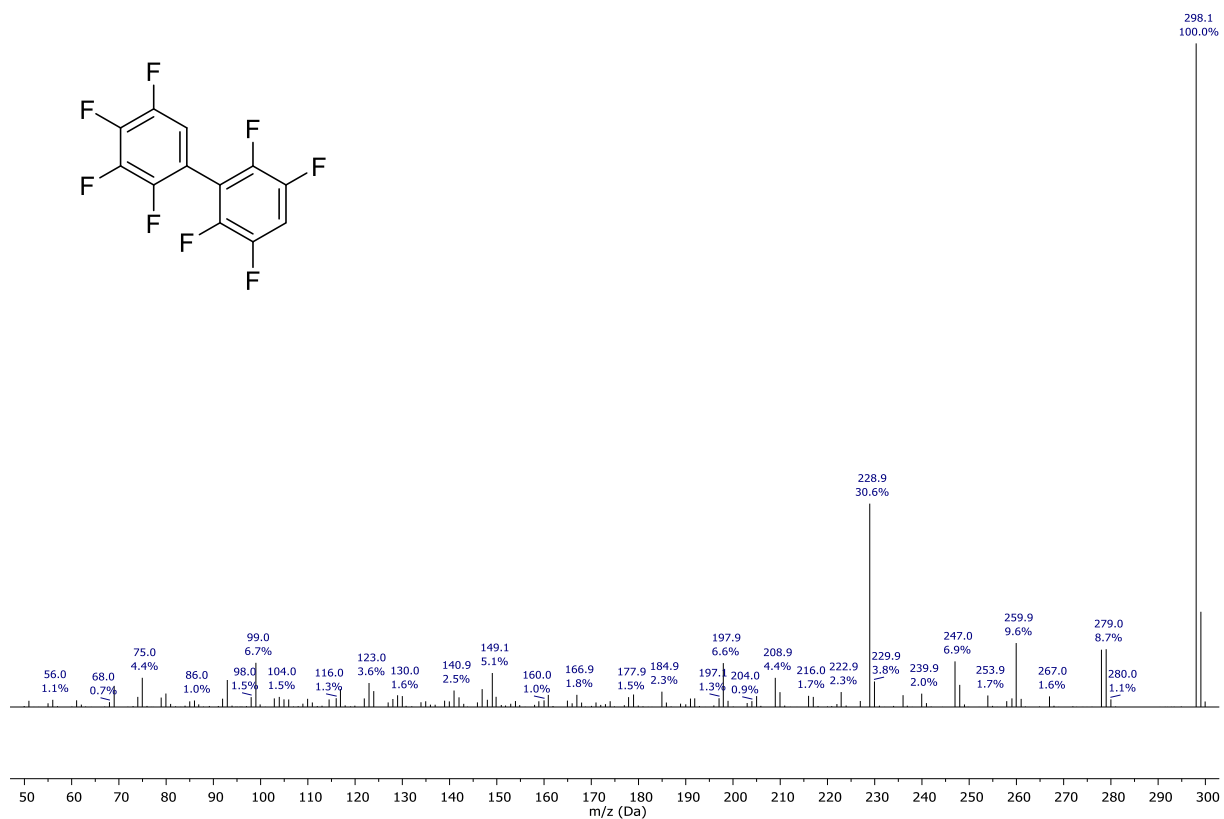

Figure S30 EI-Spectrum (EI<sup>+</sup>): 2,2',3,3',4,5,5',6'-Octafluoro-1,1'-biphenyl

## 2,3,3',4,5,5',6-Heptafluoro-1,1'-biphenyl (21)

<sup>1</sup>H NMR (400 MHz, Chloroform-d) δ 6.98 (ddt, *J* = 7.7, 2.4, 1.2 Hz, 2H), 6.93 (tt, 8.8, 2.3 Hz, 1H).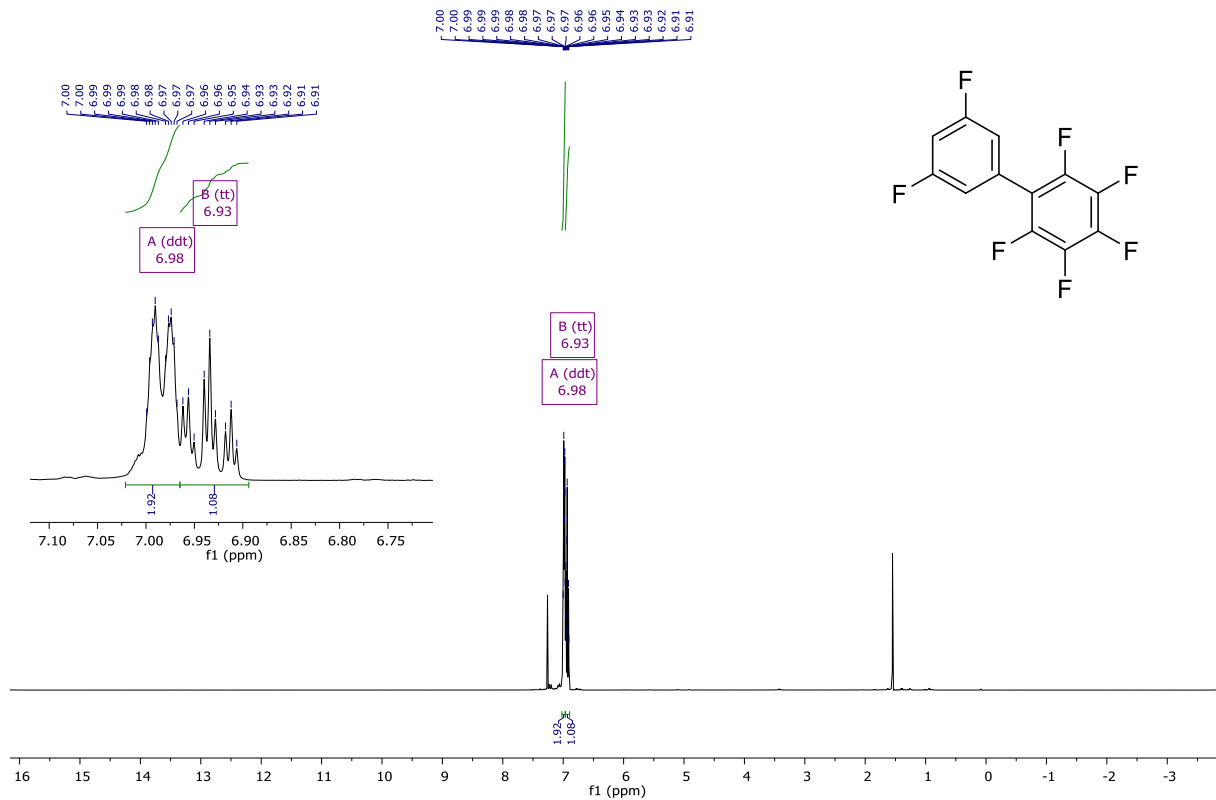Figure S31 <sup>1</sup>H-NMR: 2,3,3',4,5,5',6-Heptafluoro-1,1'-biphenyl<sup>19</sup>F NMR (235 MHz, Chloroform-d) δ -108.59, -142.15 – -143.59 (m), -153.35 (20.9 Hz), -160.30 – -162.60 (m).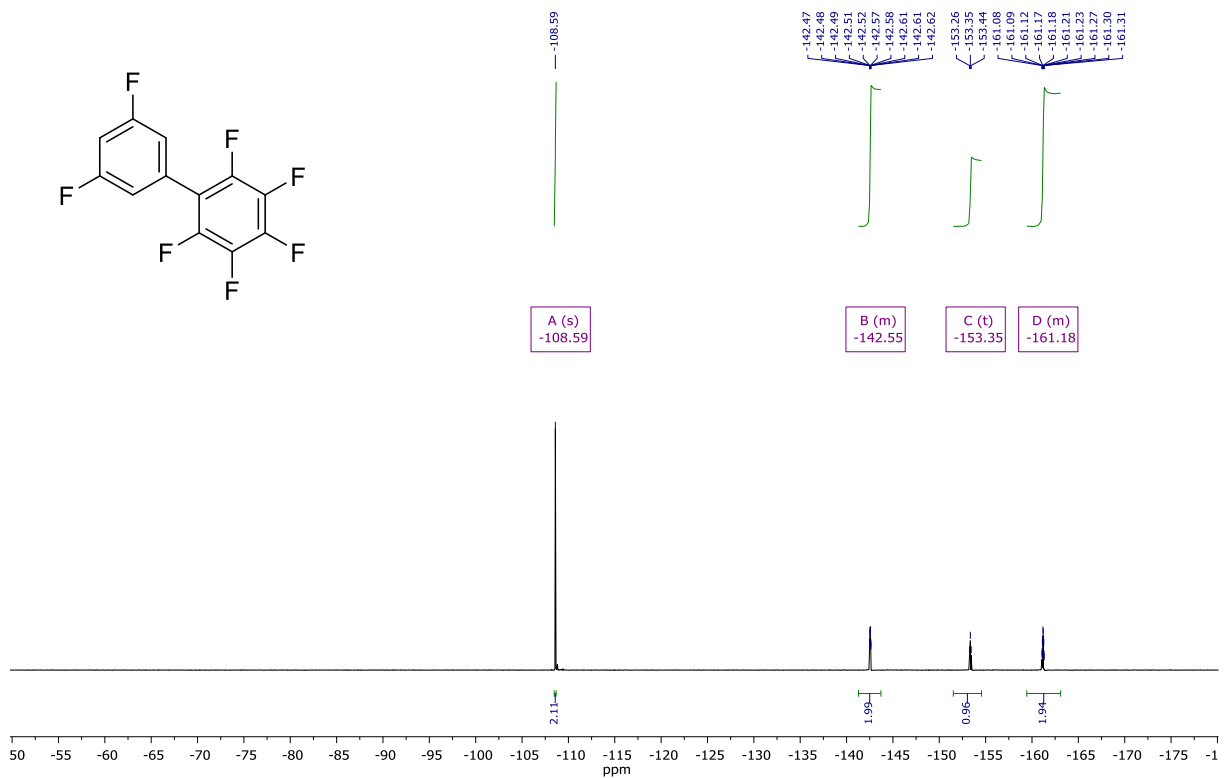Figure S32 <sup>19</sup>F-NMR {<sup>1</sup>H}: 2,3,3',4,5,5',6-Heptafluoro-1,1'-biphenyl

$^{13}\text{C}$  NMR (101 MHz, Chloroform- $d$ )  $\delta$  163.10 (dd), 145.75 – 142.81 (m), 141.23 (dt),  
 $J = 255.7, 13.4, 5.1$  Hz), 139.63 – 136.56 (m), 129.23 (td), 5, 3.9, 1.8 Hz), 114.19 – 113.85 (m),  
 113.82 – 113.37 (m), 105.16 (t), 25.1 Hz).

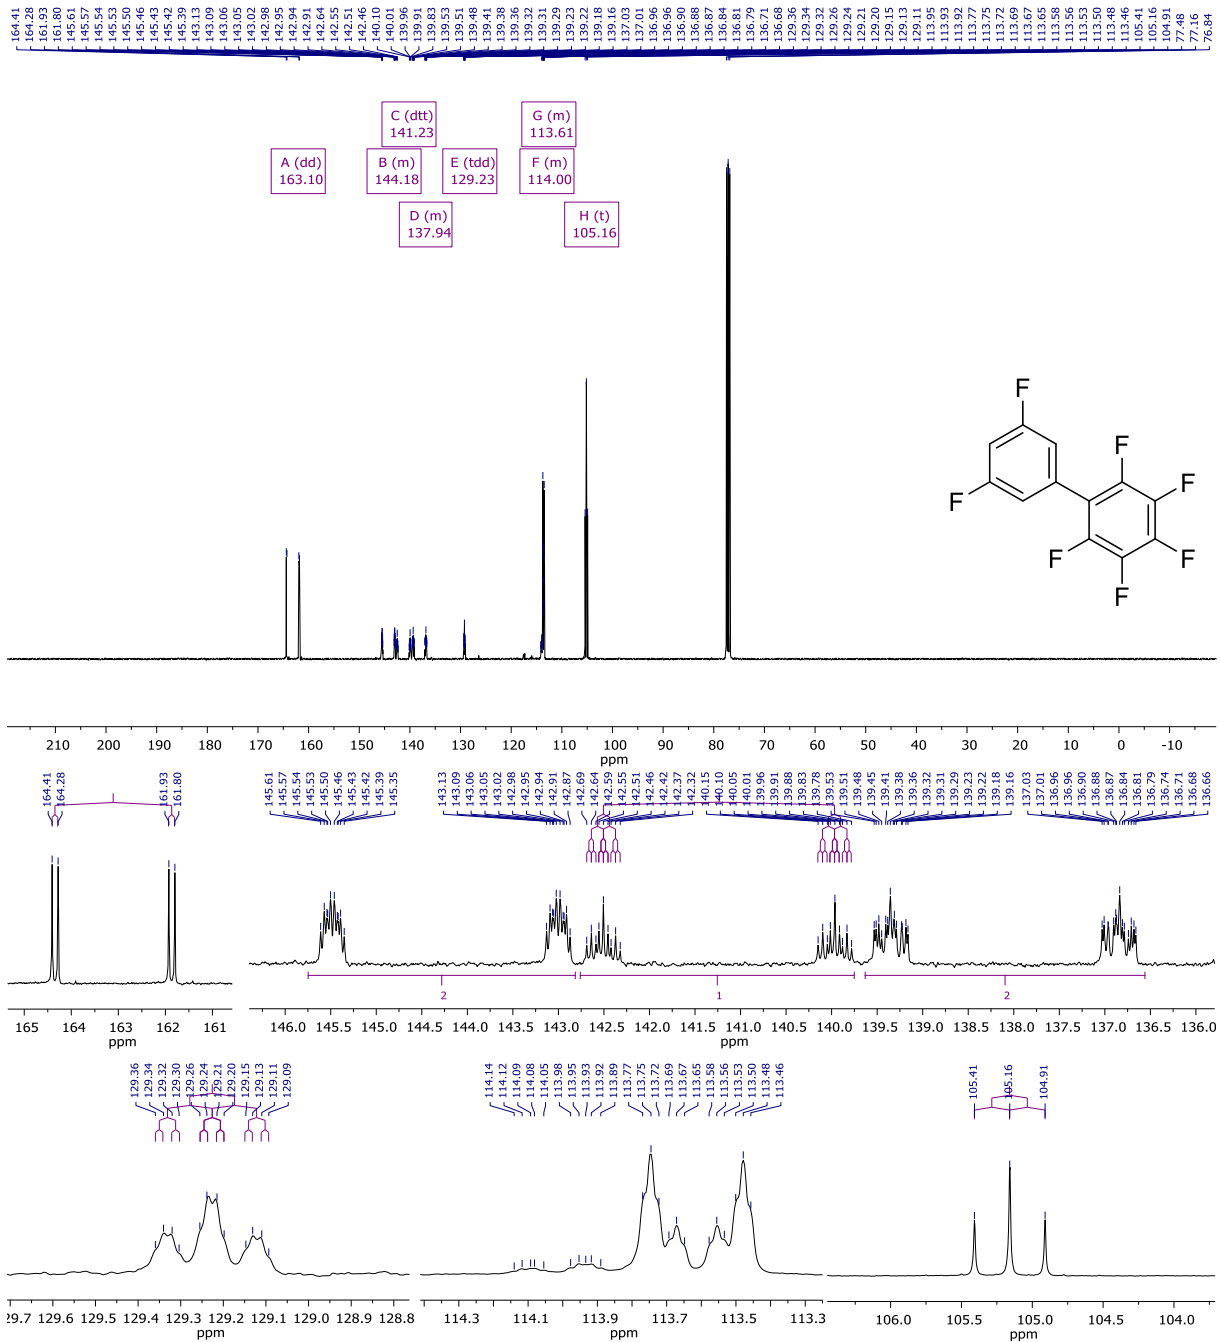

Figure S33  $^{13}\text{C}$  NMR: 2,3,3',4,5,5',6-Heptafluoro-1,1'-biphenyl

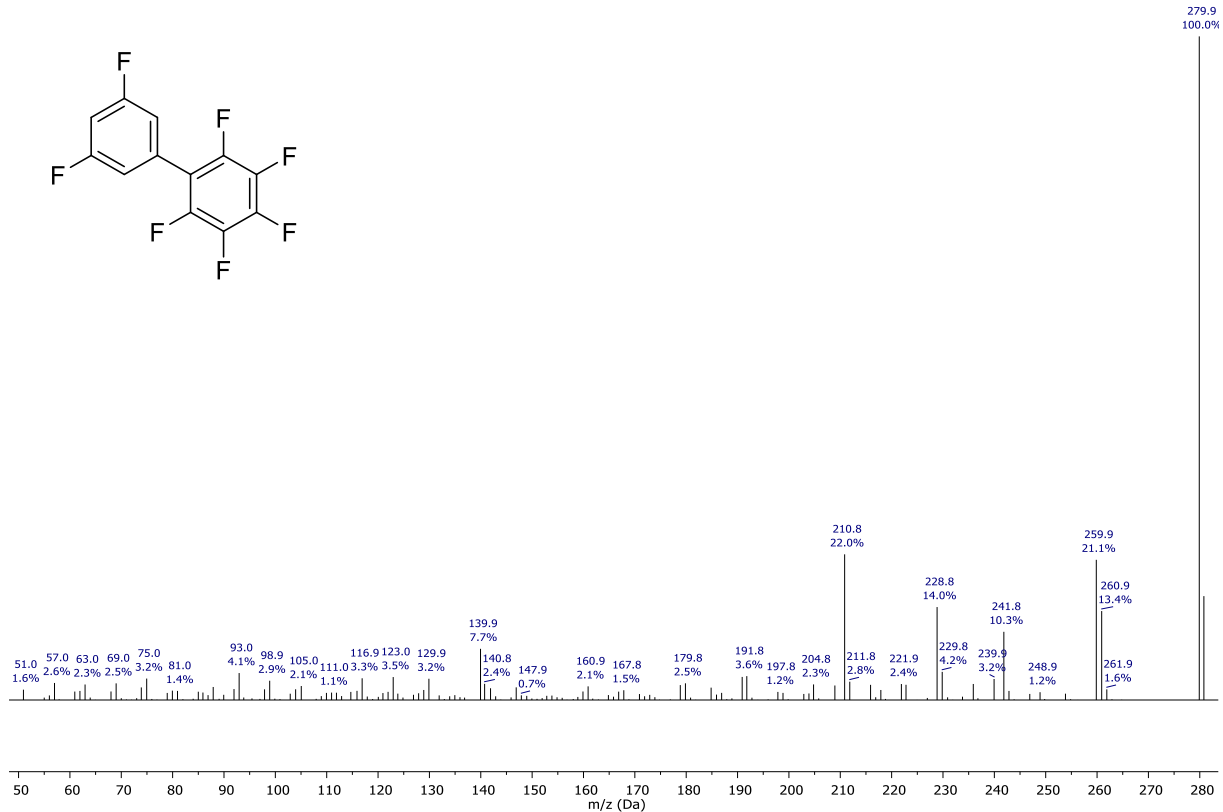Figure S34 EI-Spectrum (EI<sup>+</sup>): 2,3,3',4,5,5',6-Heptafluoro-1,1'-biphenyl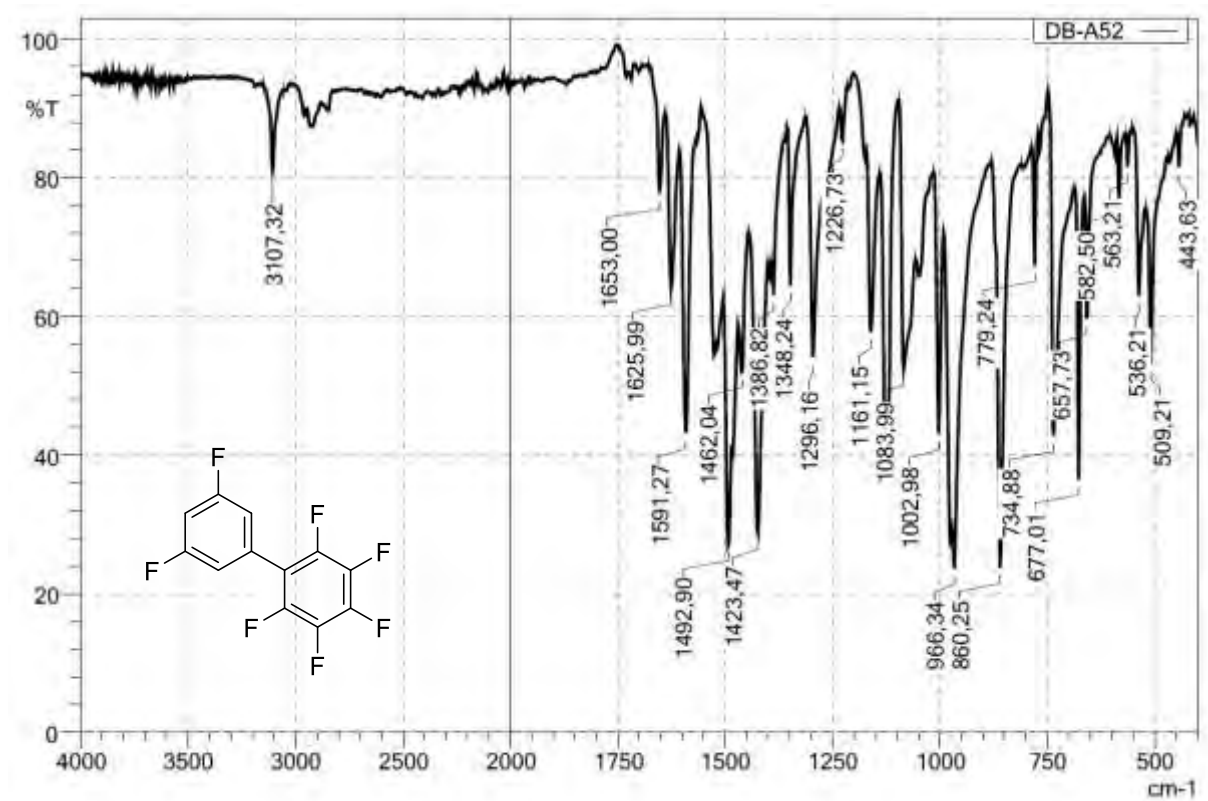

Figure S35 IR (ATR)-Spectrum: 2,3,3',4,5,5',6-Heptafluoro-1,1'-biphenyl

## 2,3,3',4,4',5,5',6-Octafluoro-1,1'-biphenyl (22)

<sup>1</sup>H NMR (250 MHz, Chloroform-d) δ 7.14 – 7.05 (m, 1H).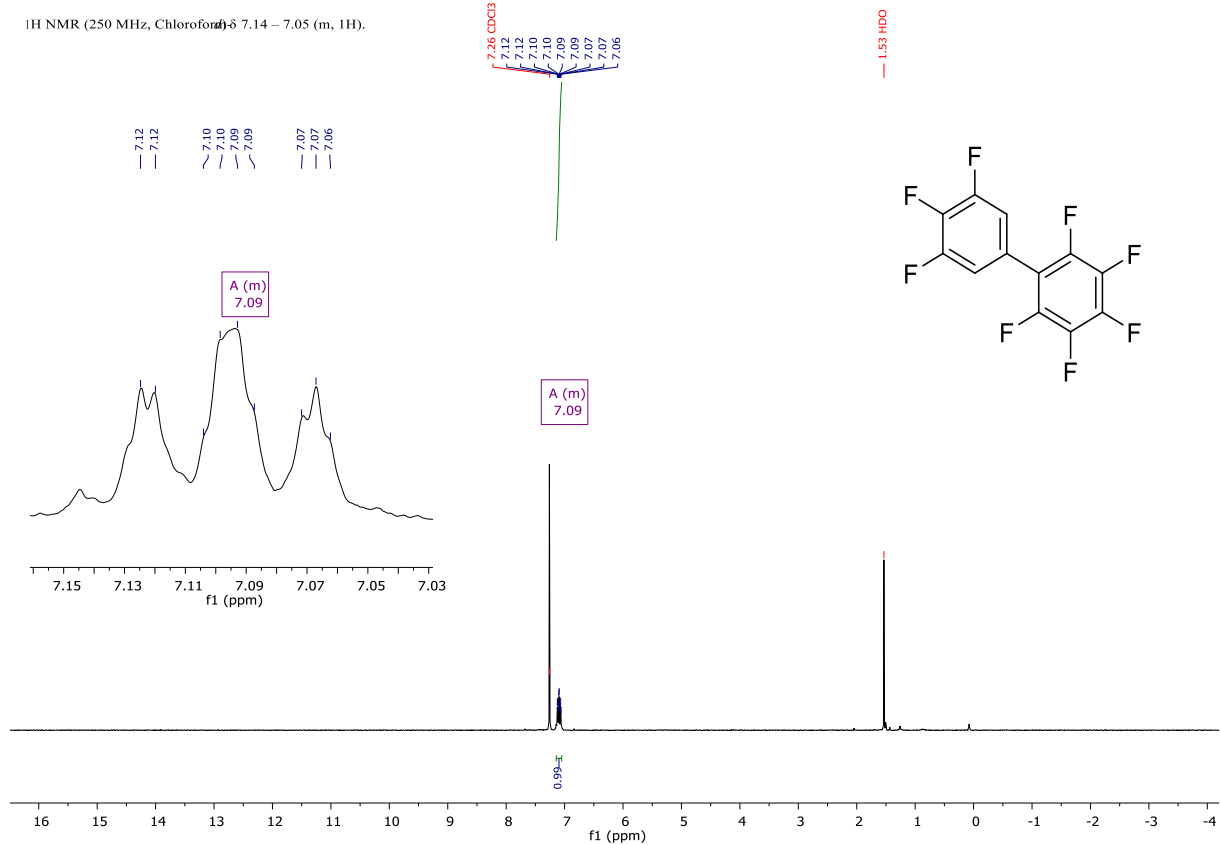Figure S36 <sup>1</sup>H-NMR: 2,3,3',4,4',5,5',6-Octafluoro-1,1'-biphenyl<sup>19</sup>F NMR (235 MHz, Chloroform-d) δ -132.95 (d/ = 20.5 Hz), -142.54 – -142.85 (m), -152.76 – -153.12 (m), -157.90 (d/ = 20.6 Hz), -160.75 – -161.06 (m).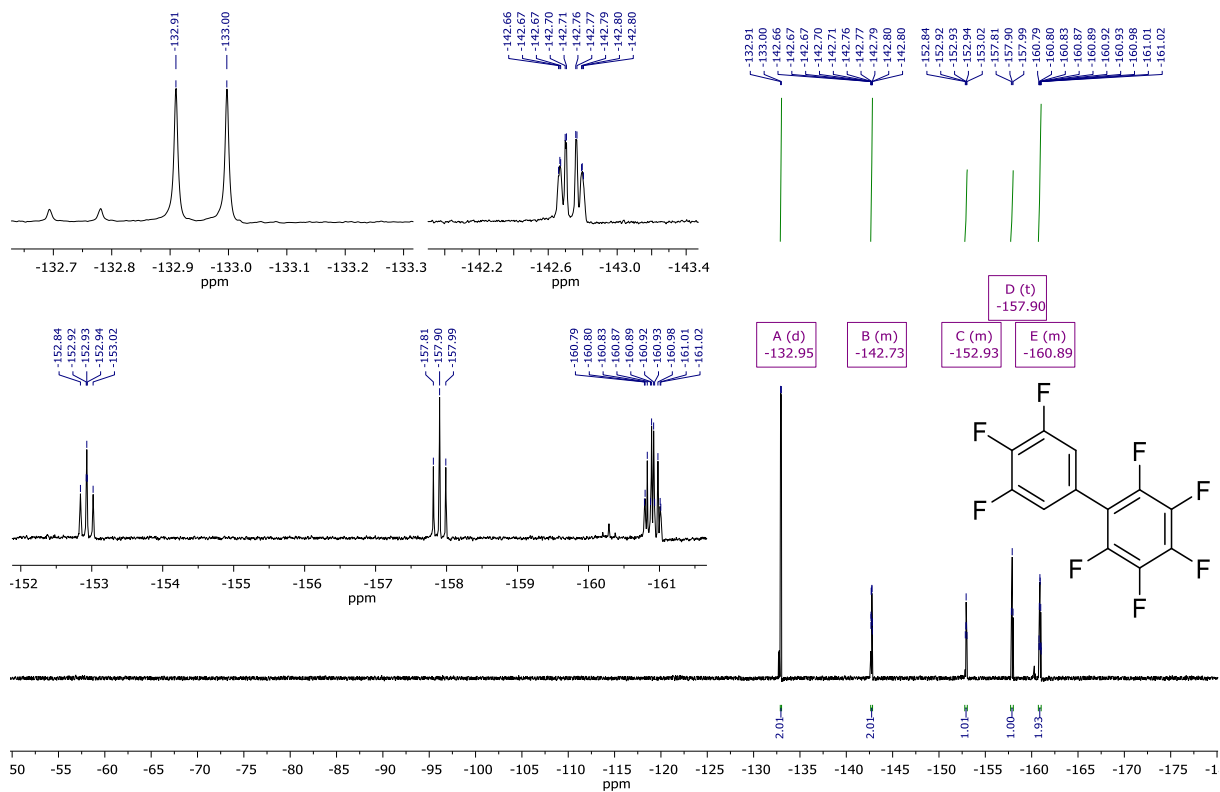Figure S37 <sup>19</sup>F-NMR {<sup>1</sup>H}: 2,3,3',4,4',5,5',6-Octafluoro-1,1'-biphenyl



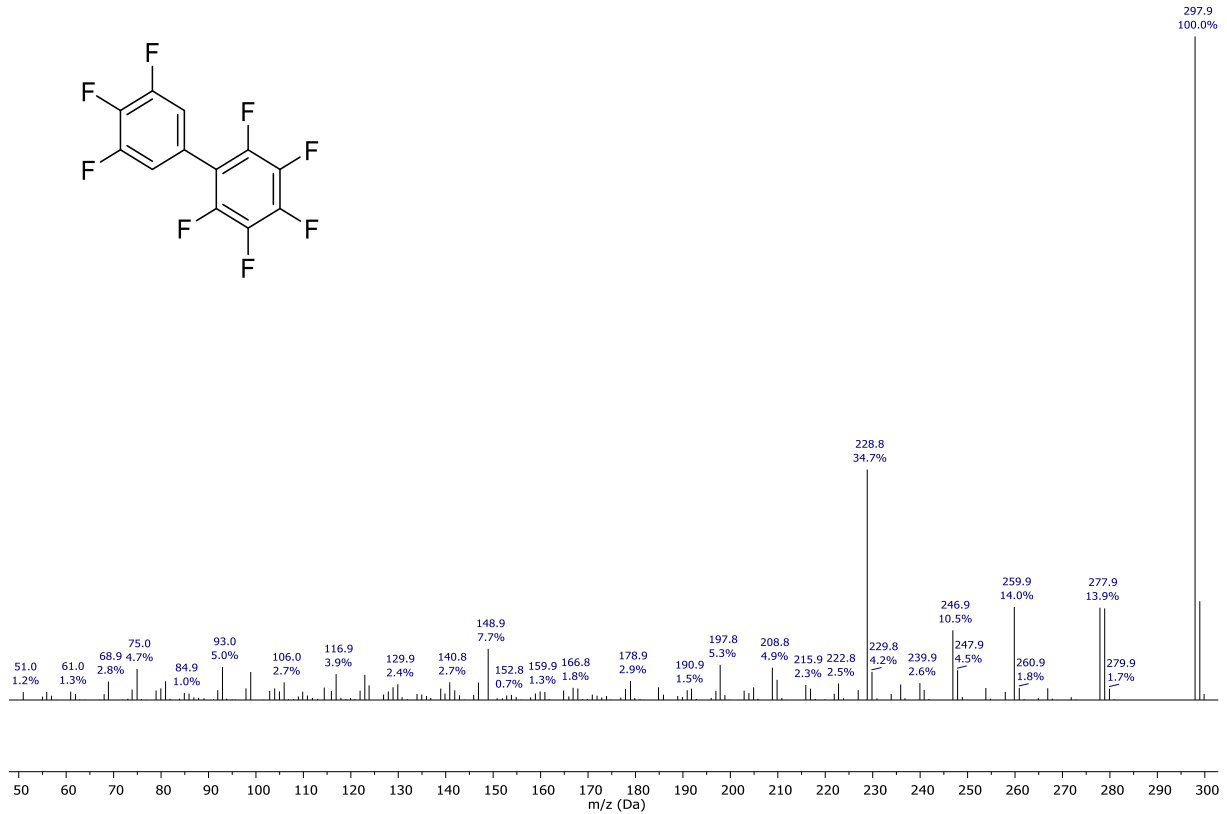Figure S39 EI-Spectrum (EI<sup>+</sup>): 2,3,3',4,4',5,5',6-Octafluoro-1,1'-biphenyl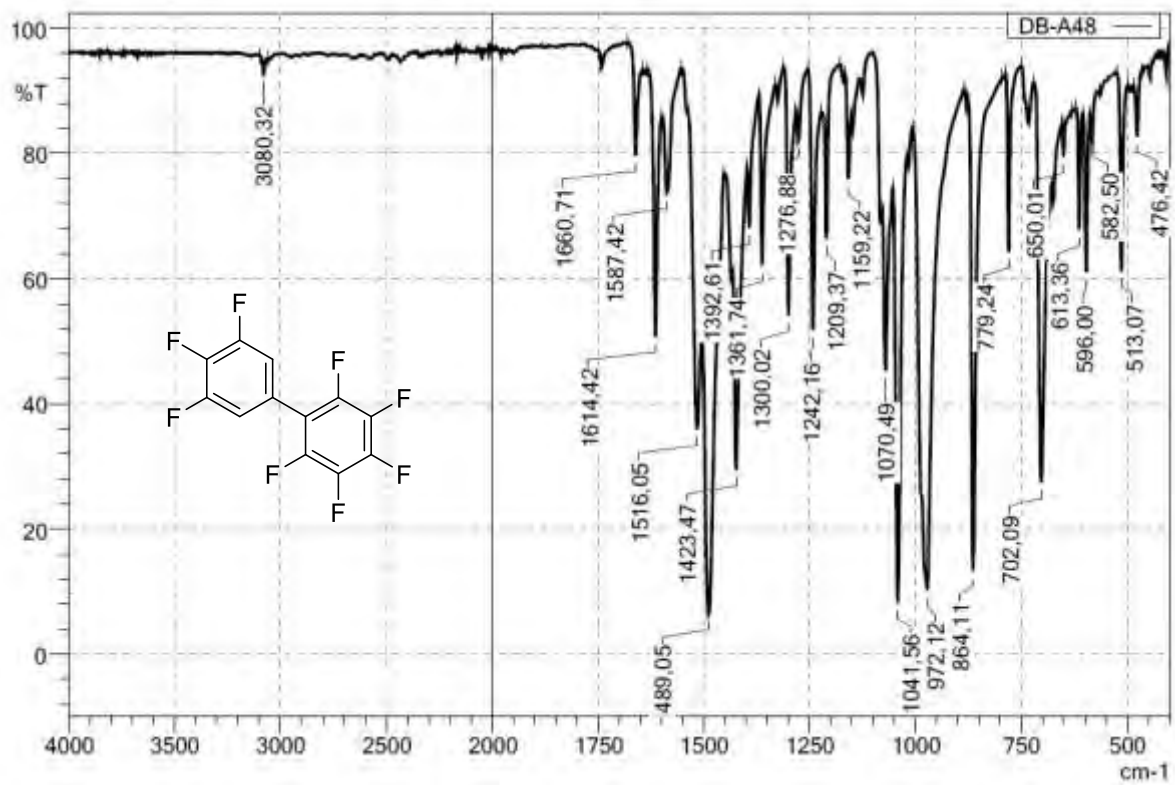

Figure S40 IR (ATR)-Spectrum: 2,3,3',4,4',5,5',6-Octafluoro-1,1'-biphenyl



**2,2',3,4,4',5,5',6-Octafluoro-1,1'-biphenyl (23)**

<sup>1</sup>H NMR (400 MHz, Chloroform-d) δ 7.17 – 7.09 (m, 1H), 7.04 (ddd, 10.0, 8.8, 6.5 Hz, 1H).

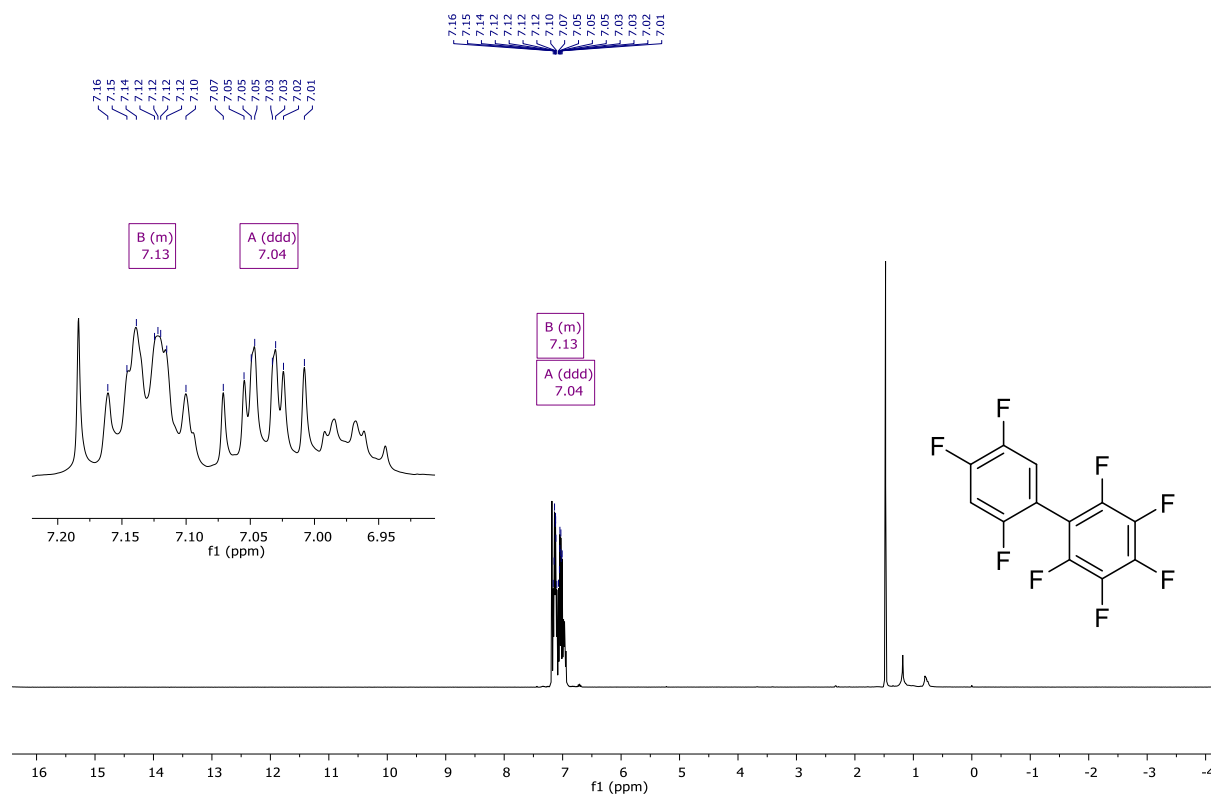

**Figure S41 <sup>1</sup>H-NMR: 2,2',3,4,4',5,5',6-Octafluoro-1,1'-biphenyl**

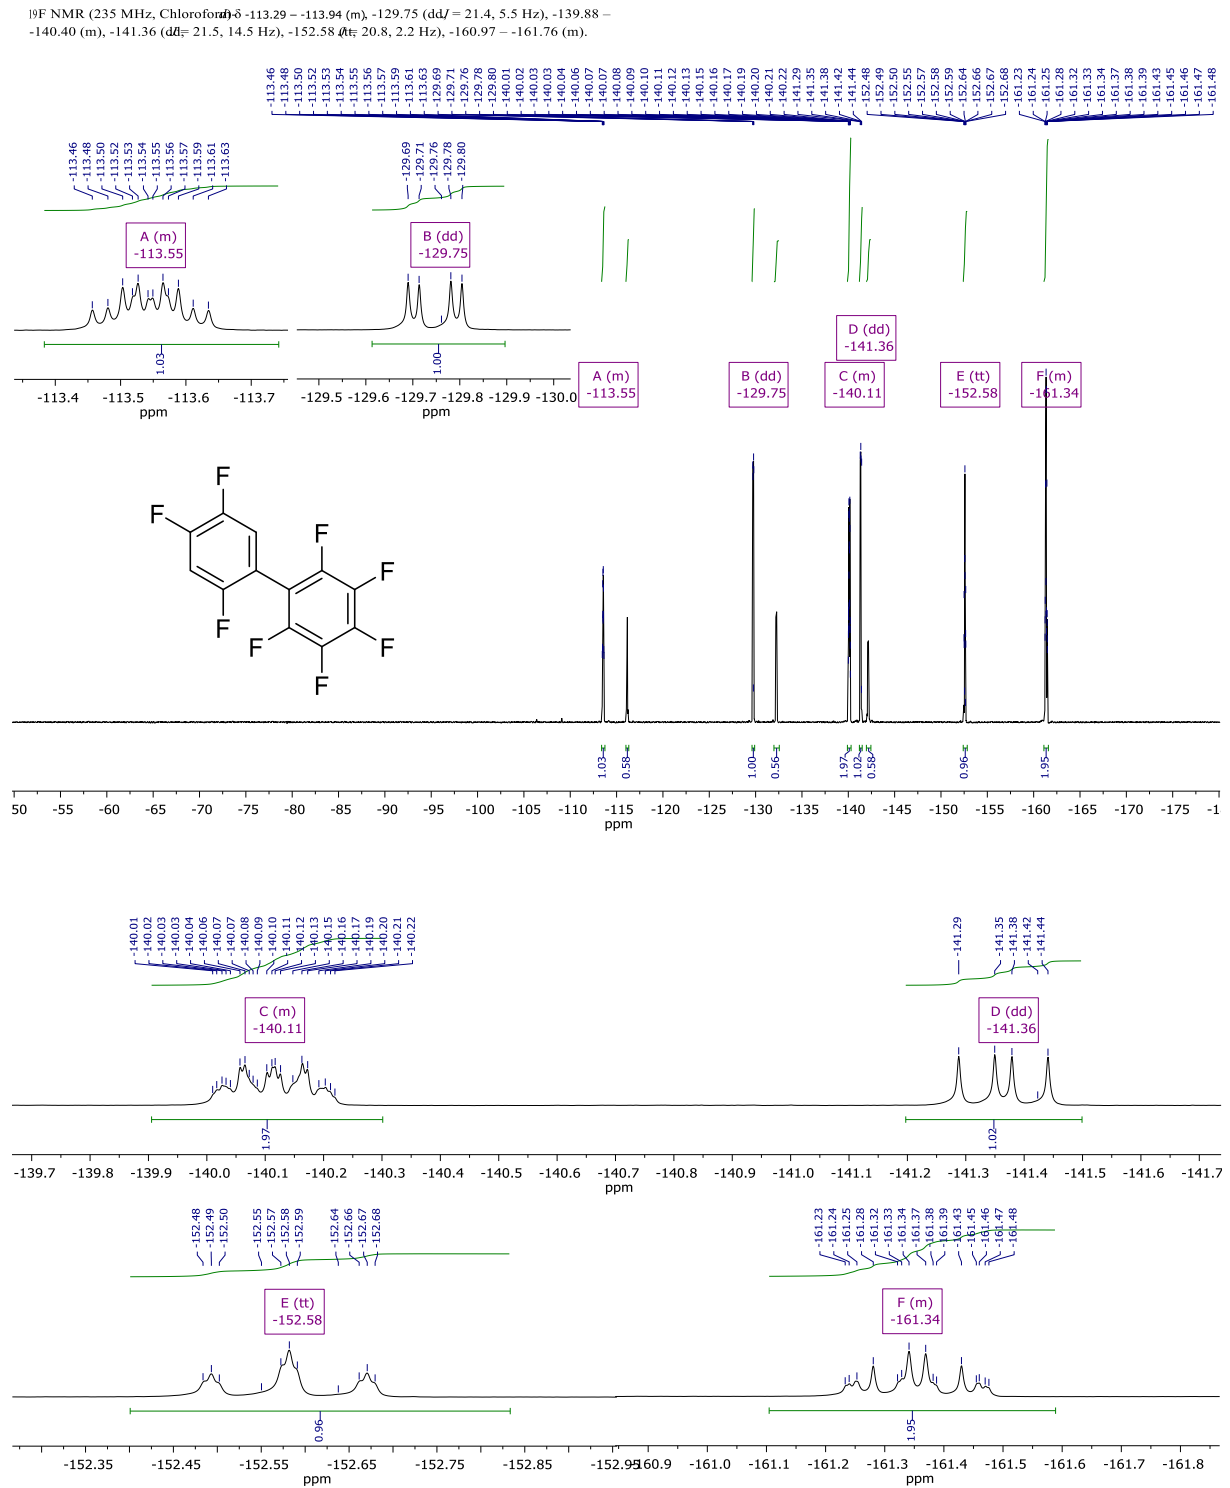Figure S42  $^{19}\text{F}$ -NMR [ $^1\text{H}$ ]: 2,2',3,4,4',5,5',6-Octafluoro-1,1'-biphenyl

$^{13}\text{C}$  NMR (101 MHz, Chloroform- $d_3$ )  $\delta$  155.40 (ddd,  $J = 250.3, 9.5, 2.4$  Hz), 151.23 (ddd, 255.4, 14.3, 12.3 Hz), 148.29 – 145.46 (m), 145.67 – 142.95 (m), 143.03 – 140.01 (m), 139.50 – 136.18 (m), 119.72 ( $d, J = 21.1$  Hz), 110.22 ( $d, J = 18.6$  Hz), 108.31 ( $td, J = 18.3, 4.1$  Hz), 106.45 ( $dd, J = 28.0, 21.2$  Hz).

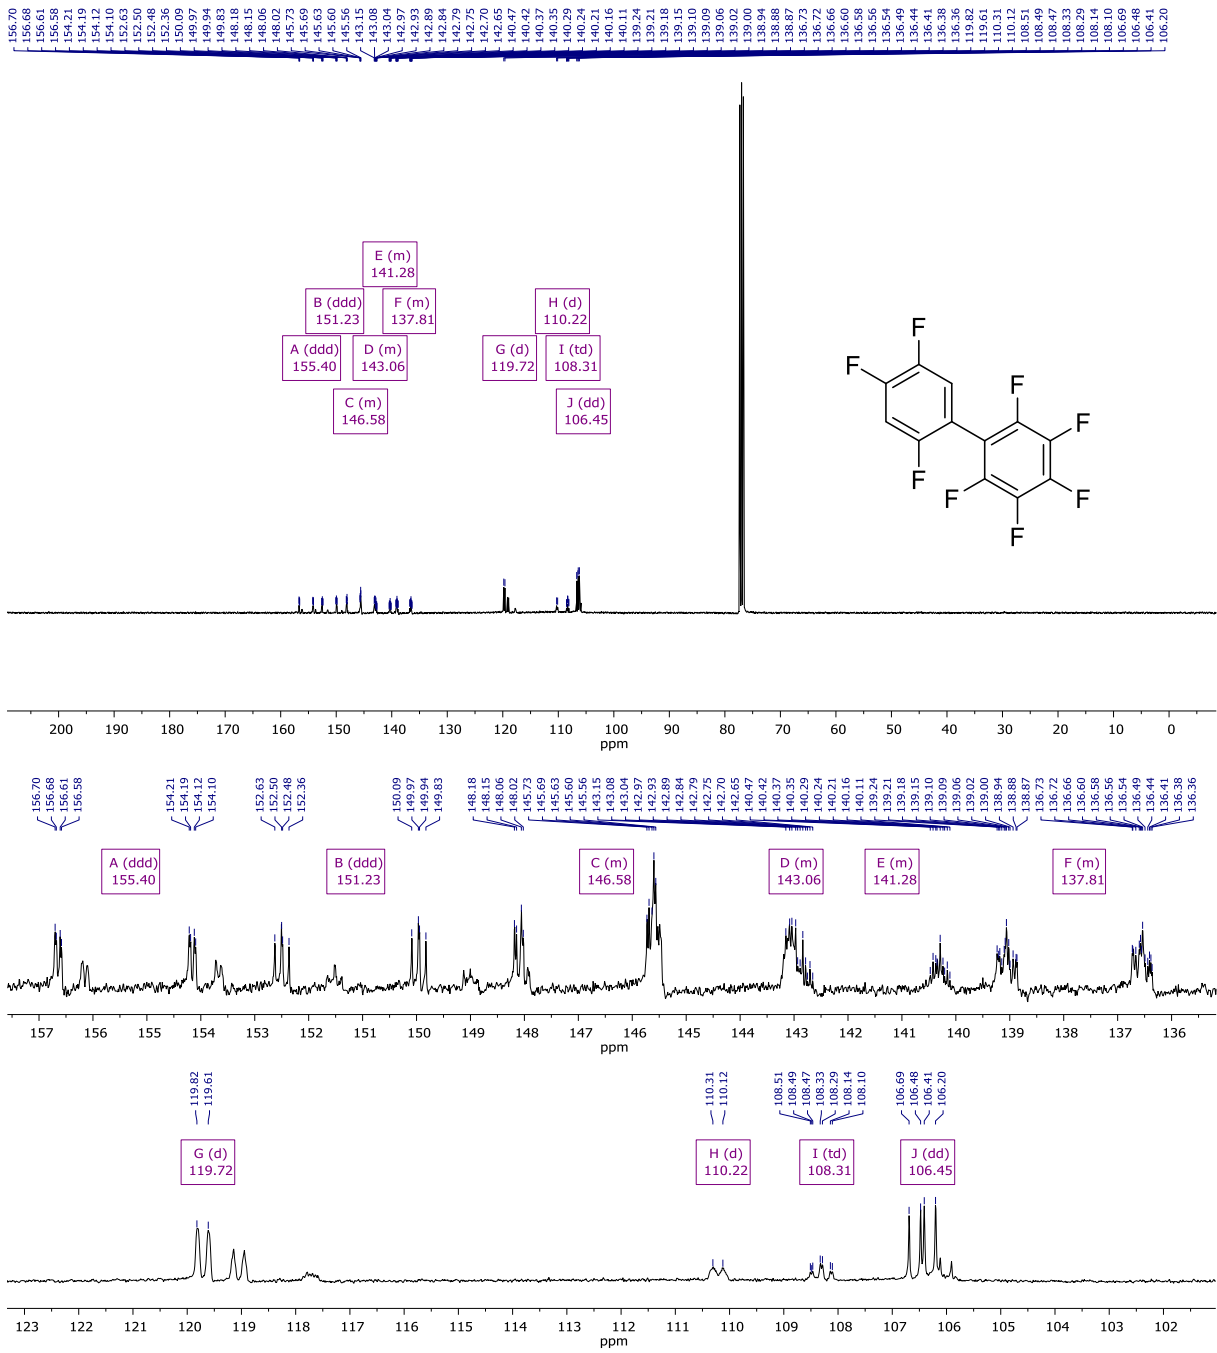

Figure S43  $^{13}\text{C}$  NMR: 2,2',3,4,4',5,5',6-Octafluoro-1,1'-biphenyl

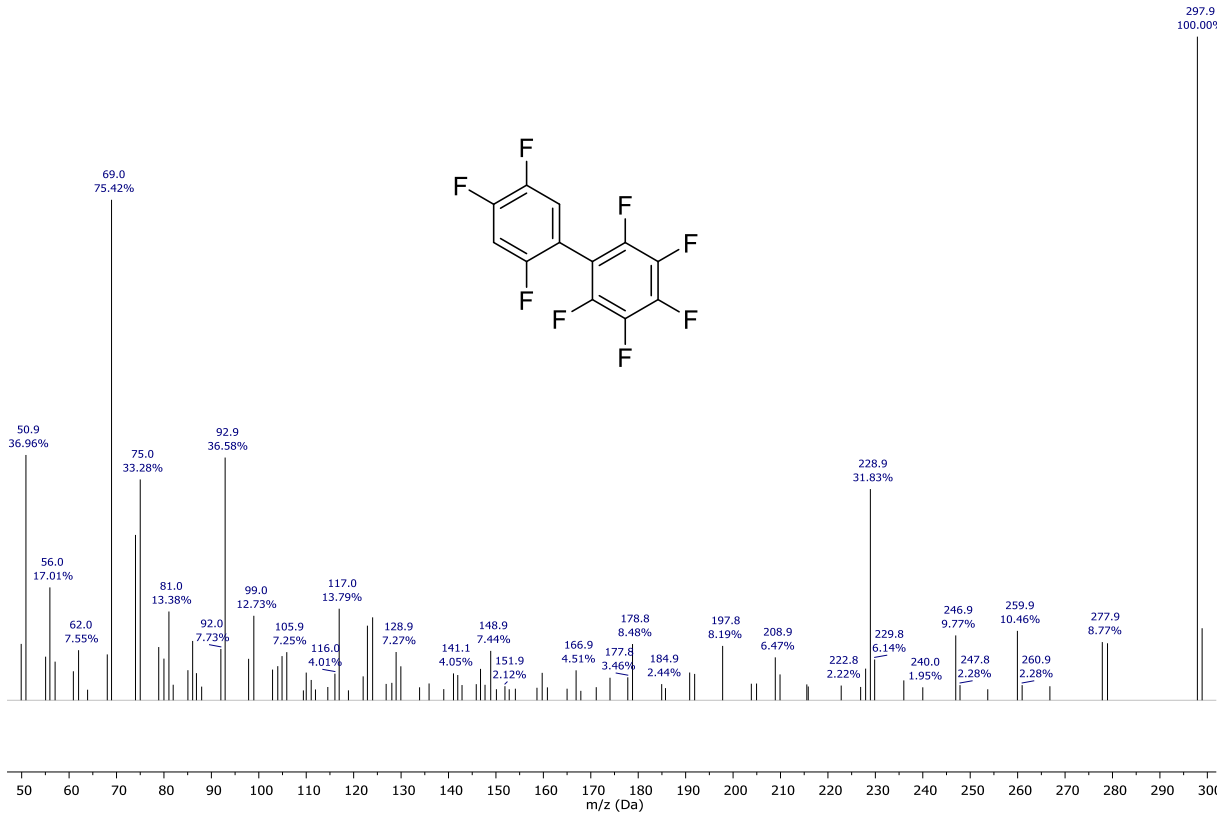Figure S44 EI-Spectrum (EI<sup>+</sup>): 2,2',3,4,4',5,5',6-Octafluoro-1,1'-biphenyl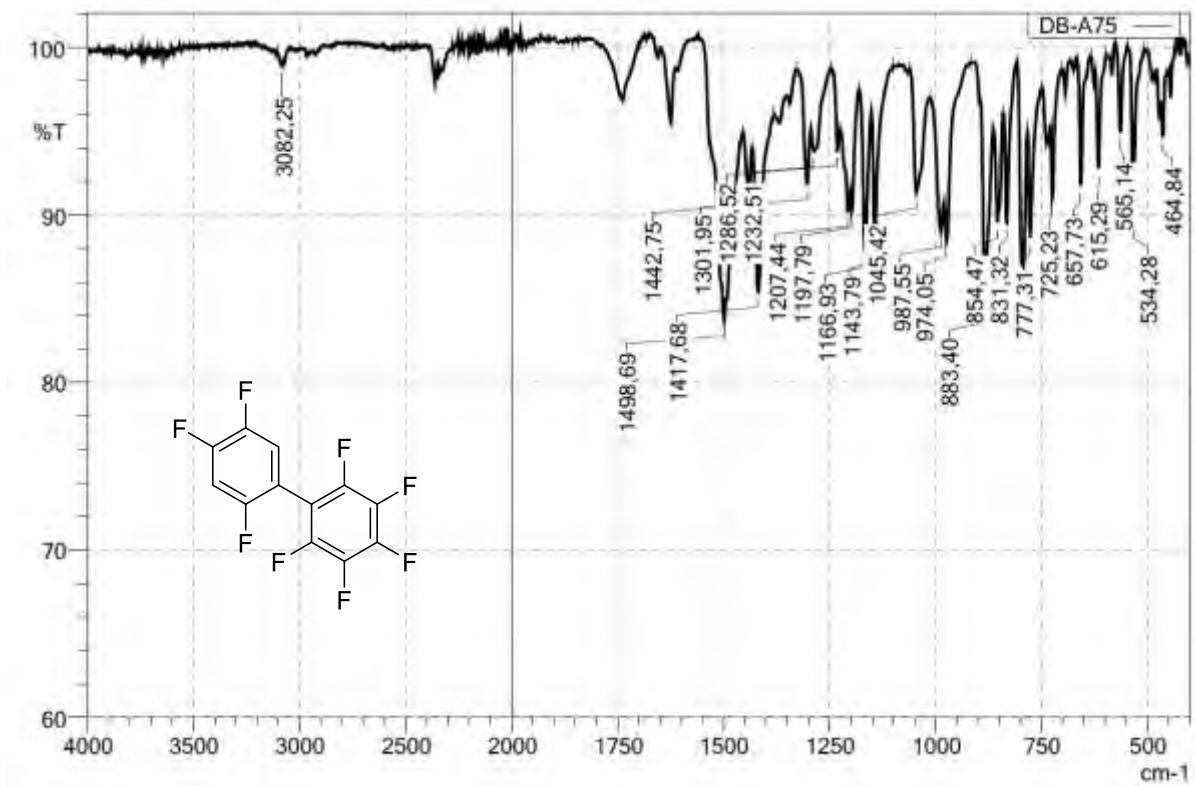

Figure S45 IR (ATR)-Spectrum: 2,2',3,4,4',5,5',6-Octafluoro-1,1'-biphenyl

## 2,2',3,3',4,4',5,5',6-Nonafluoro-1,1'-biphenyl (24)

$^{19}\text{F}$  NMR (377 MHz, Chloroform- $d_3$ )  $\delta$  -136.54 (dddd,  $J = 22.6, 20.9, 10.7, 5.6$  Hz), -137.95 (ddd, 21.2, 12.0, 3.2 Hz), -139.76 (ddd,  $J = 23.2, 9.5, 6.7, 3.1$  Hz), -151.35 (tt, 20.7, 2.4 Hz), -151.81 (xt,  $J = 20.5, 5.5$  Hz), -153.45 (xt,  $J = 20.1, 3.4$  Hz), -160.56 (-160.76 (m).

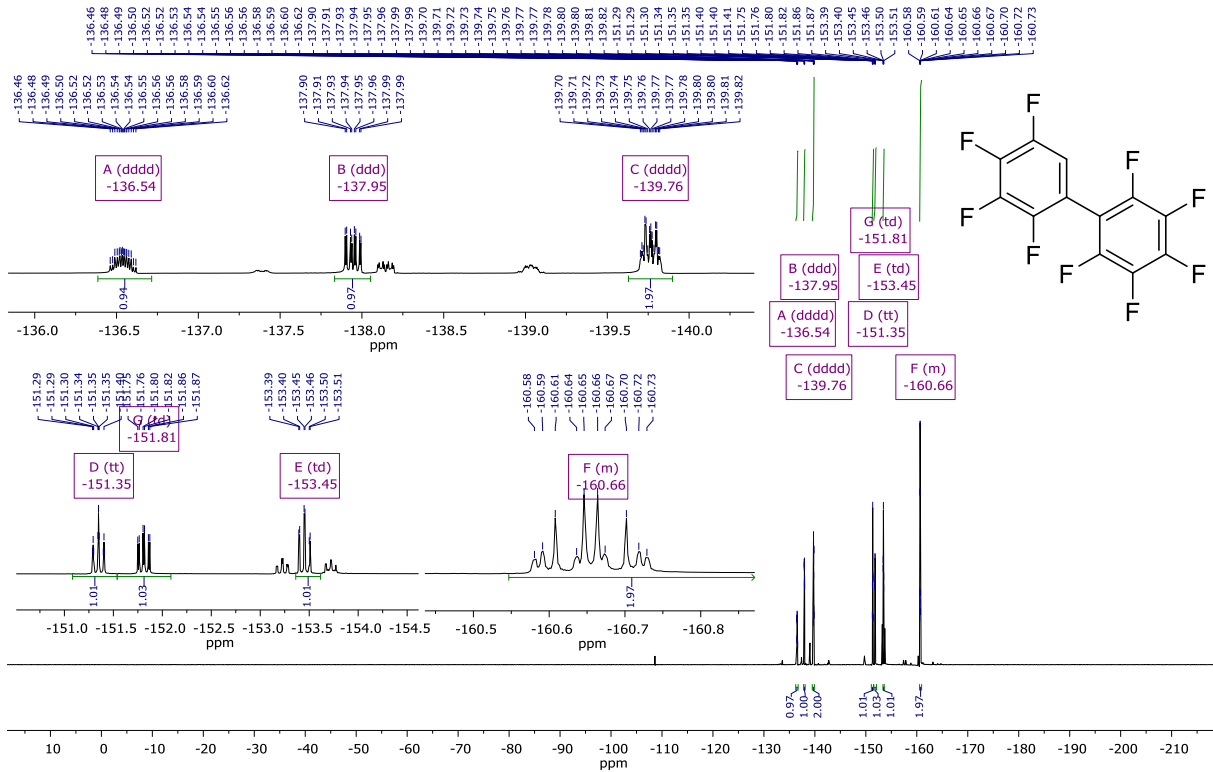Figure S46  $^{19}\text{F}$ -NMR ( $^1\text{H}$ ): 2,2',3,3',4,4',5,5',6-Nonafluoro-1,1'-biphenyl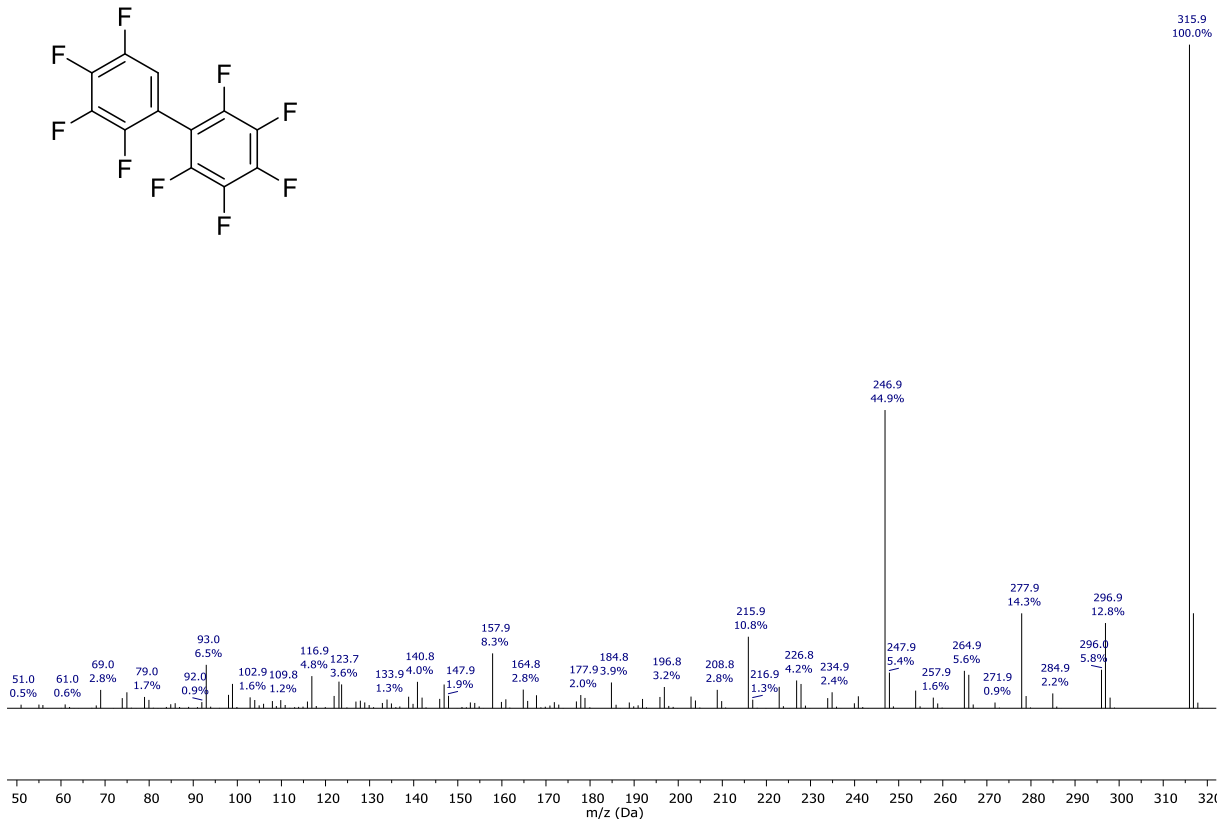Figure S47 EI-Spectrum ( $\text{EI}^+$ ): 2,2',3,3',4,4',5,5',6-Nonafluoro-1,1'-biphenyl

## 2,3',4,4',5',6-Hexafluoro-1,1'-biphenyl (25)

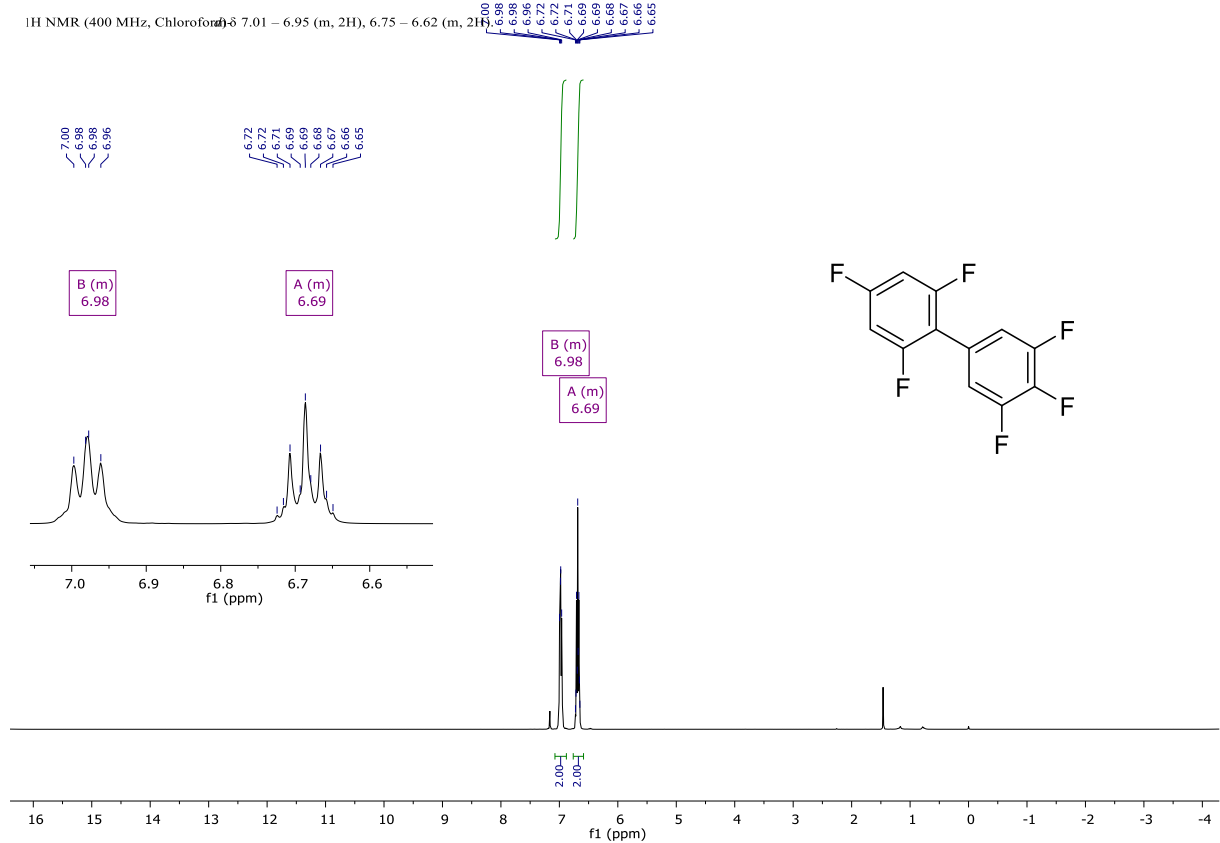Figure S48  $^1\text{H-NMR}$ : 2,3',4,4',5',6-Hexafluoro-1,1'-biphenyl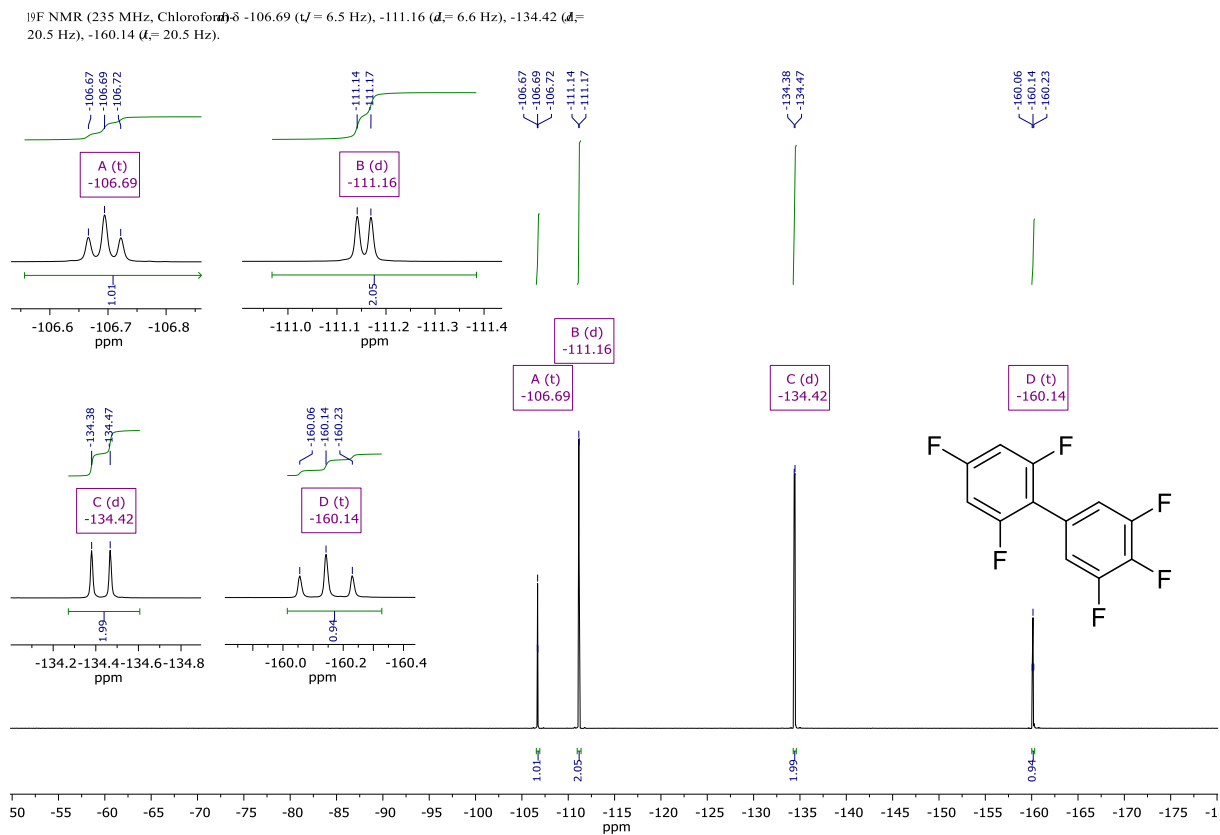Figure S49  $^{19}\text{F-NMR}$   $\{^1\text{H}\}$ : 2,3',4,4',5',6-Hexafluoro-1,1'-biphenyl

$^{13}\text{C}$  NMR (101 MHz, Chloroform- $d_3$ )  $\delta$  164.45 – 161.42 (m), 160.55 (ddd; 250.9, 14.7, 8.9 Hz),  
 151.57 (ddd/ $\nu$  = 249.7, 10.0, 4.2 Hz), 140.25 (dt; 253.8, 15.1 Hz), 124.59 (td; 9.0, 5.1 Hz), 115.50  
 – 114.86 (m), 112.75 ( $\nu$ / $\nu$  = 19.5, 3.6 Hz), 101.97 – 100.81 (m).

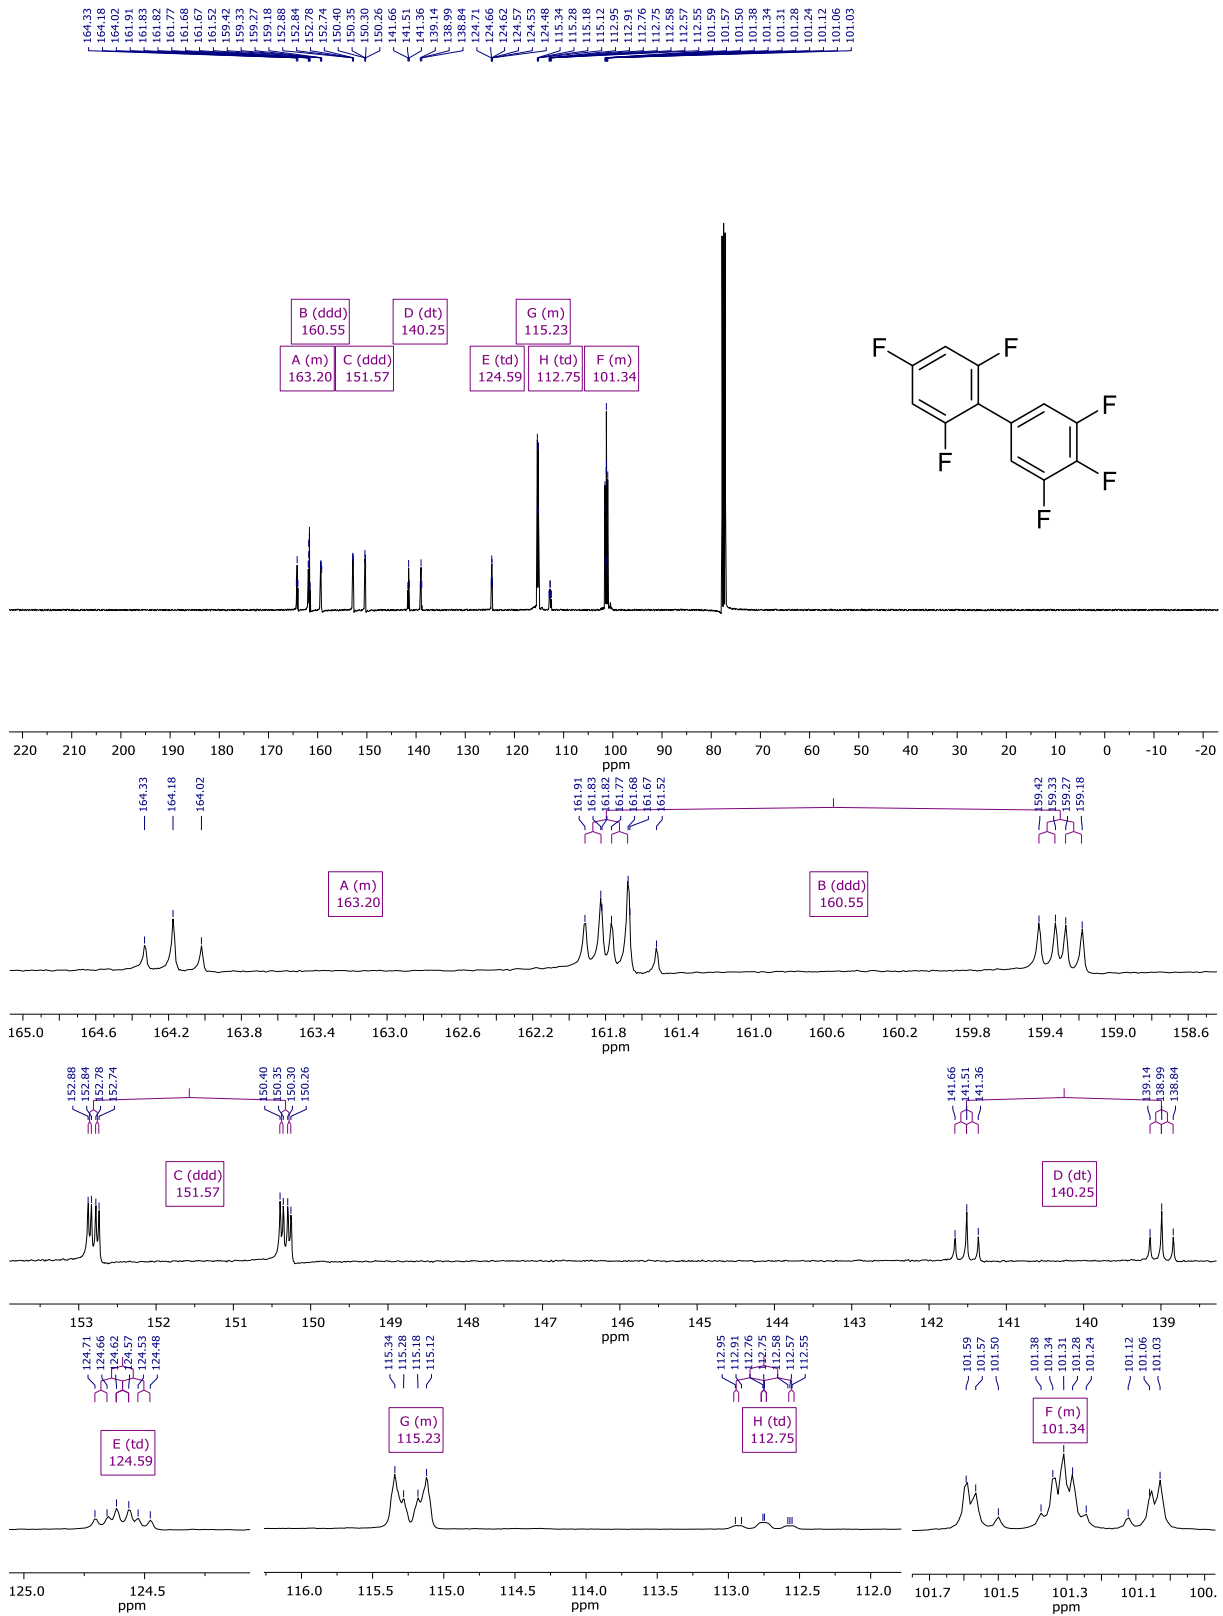

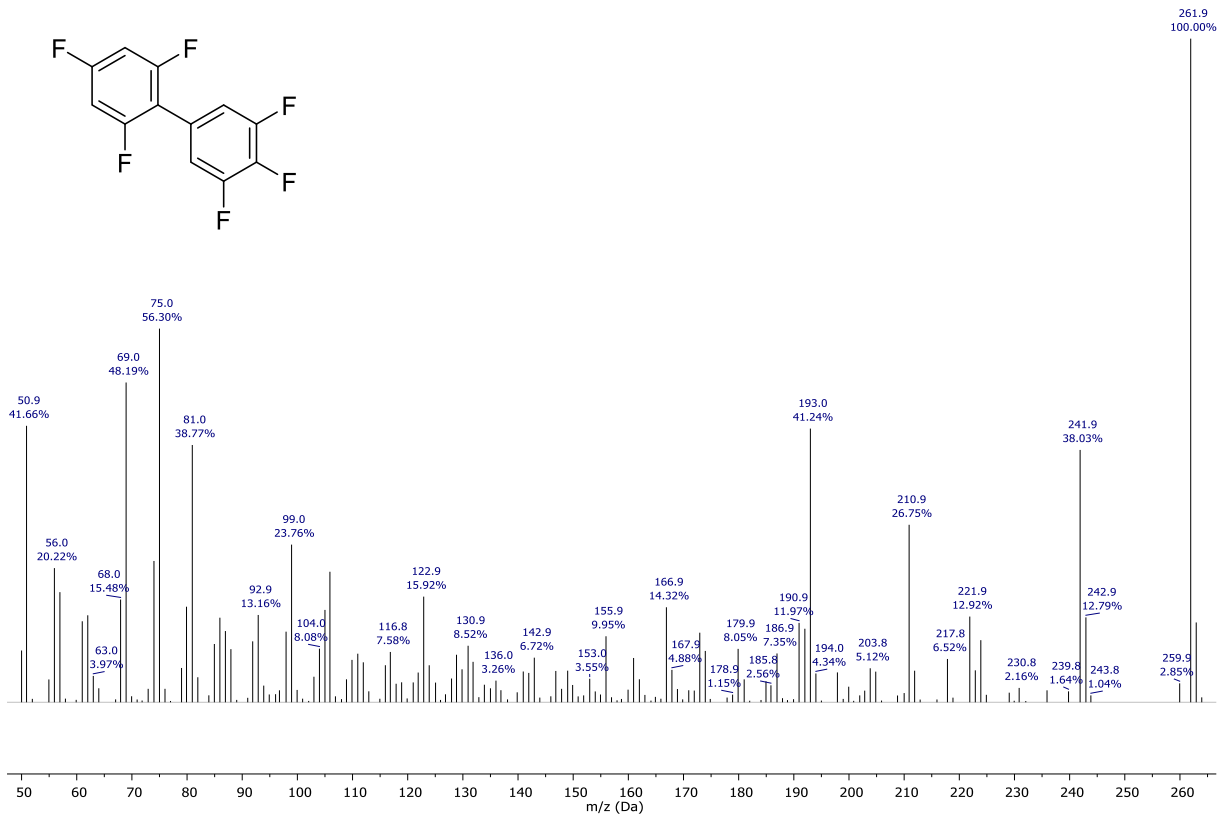Figure S51 EI-Spectrum (EI<sup>+</sup>): 2,3',4,4',5',6-Hexafluoro-1,1'-biphenyl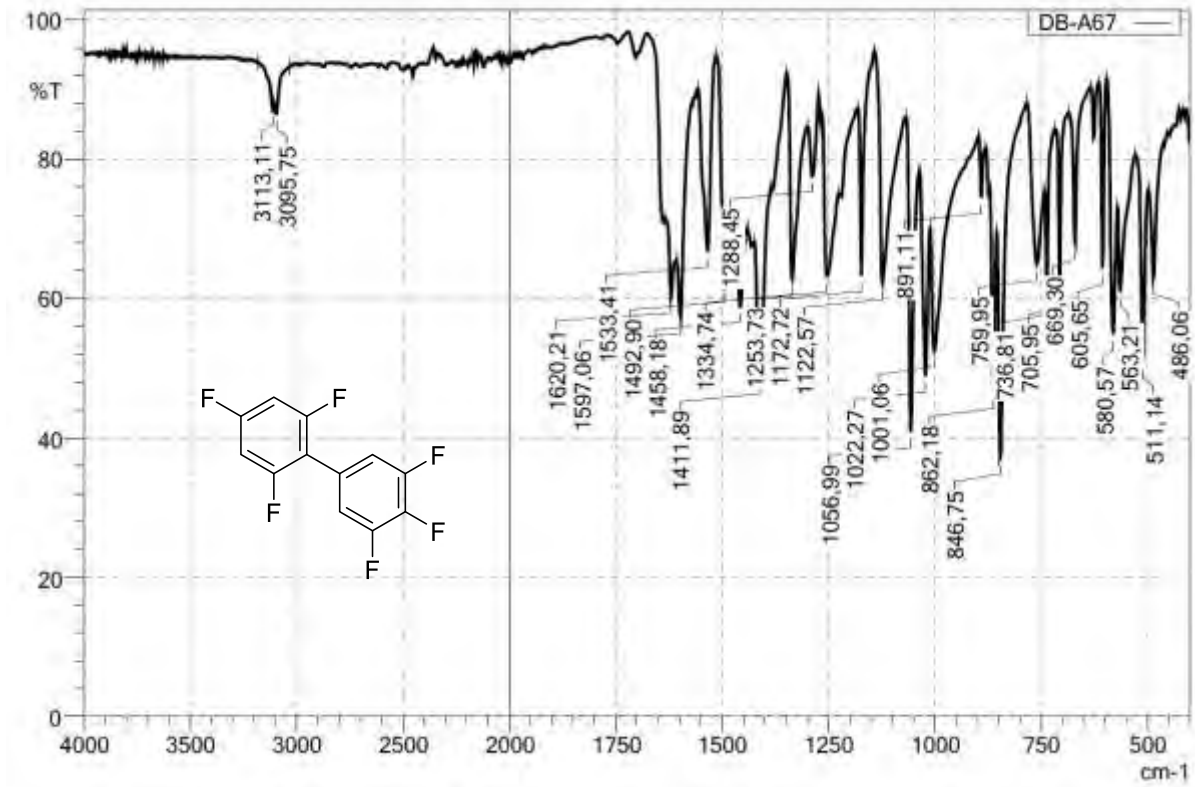

Figure S52 IR (ATR)-Spectrum: 2,3',4,4',5',6-Hexafluoro-1,1'-biphenyl



## 2,2',4,4',5,6'-Hexafluoro-1,1'-biphenyl (26)

$^1\text{H NMR}$  (400 MHz, Chloroform- $d_3$ )  $\delta$  7.19 (ddd,  $J = 10.3, 8.7, 6.4$  Hz, 1H), 7.06 (ddd, 10.2, 8.9, 6.6 Hz, 1H), 6.84 – 6.74 (m, 2H).

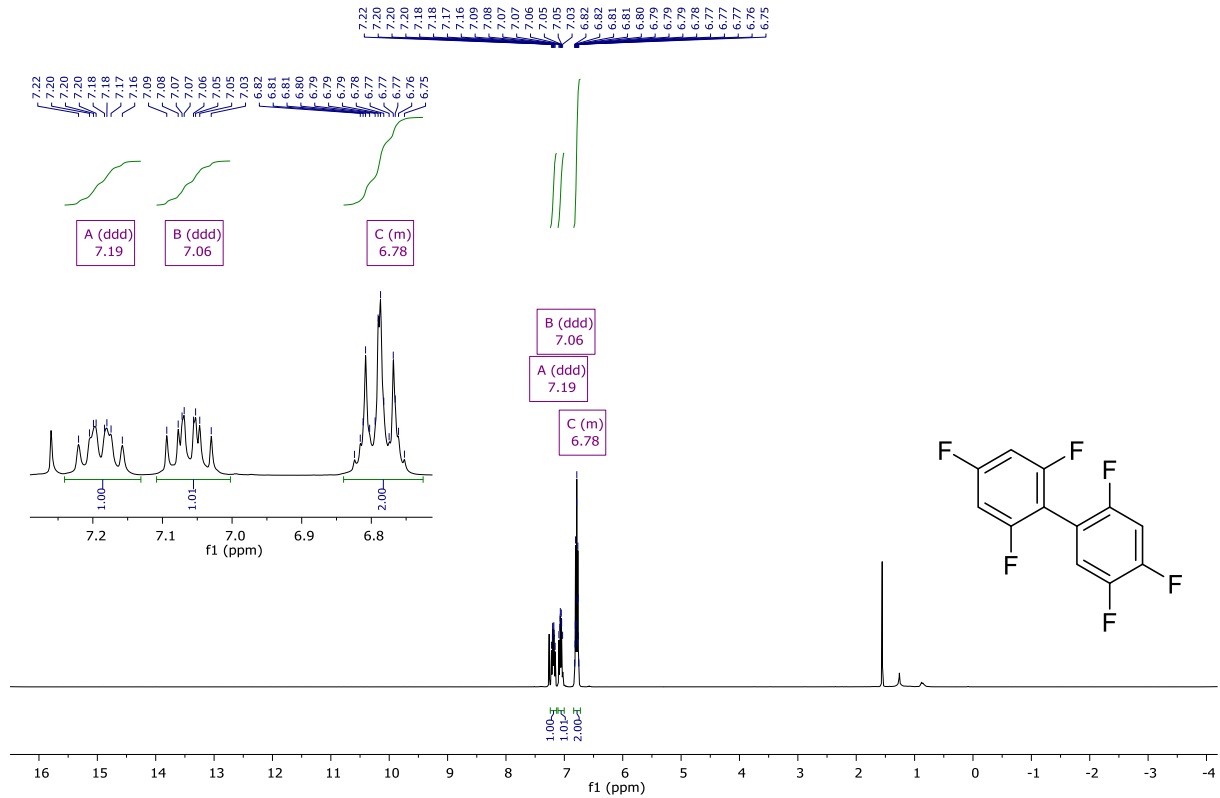Figure S53  $^1\text{H-NMR}$ : 2,2',4,4',5,6'-Hexafluoro-1,1'-biphenyl

$^{19}\text{F NMR}$  (235 MHz, Chloroform- $d_3$ )  $\delta$  -106.33 ( $t$ ,  $J = 6.9$  Hz), -109.05 (dd,  $J = 10.8, 6.9$  Hz), -114.09 (dtd,  $J = 14.6, 10.8, 5.0$  Hz), -131.81 (dd, 21.5, 5.0 Hz), -142.46 (dd, 21.5, 14.6 Hz).

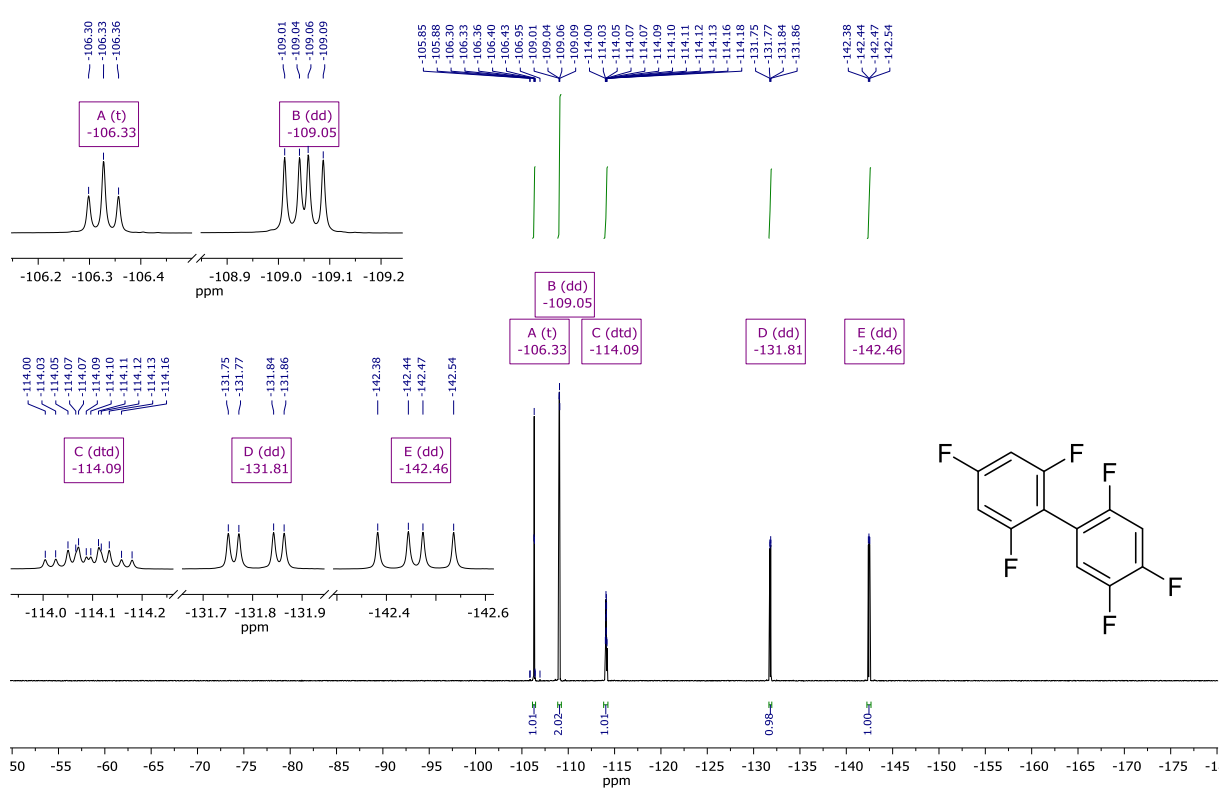Figure S54  $^{19}\text{F-NMR}$  [ $^1\text{H}$ ]: 2,2',4,4',5,6'-Hexafluoro-1,1'-biphenyl

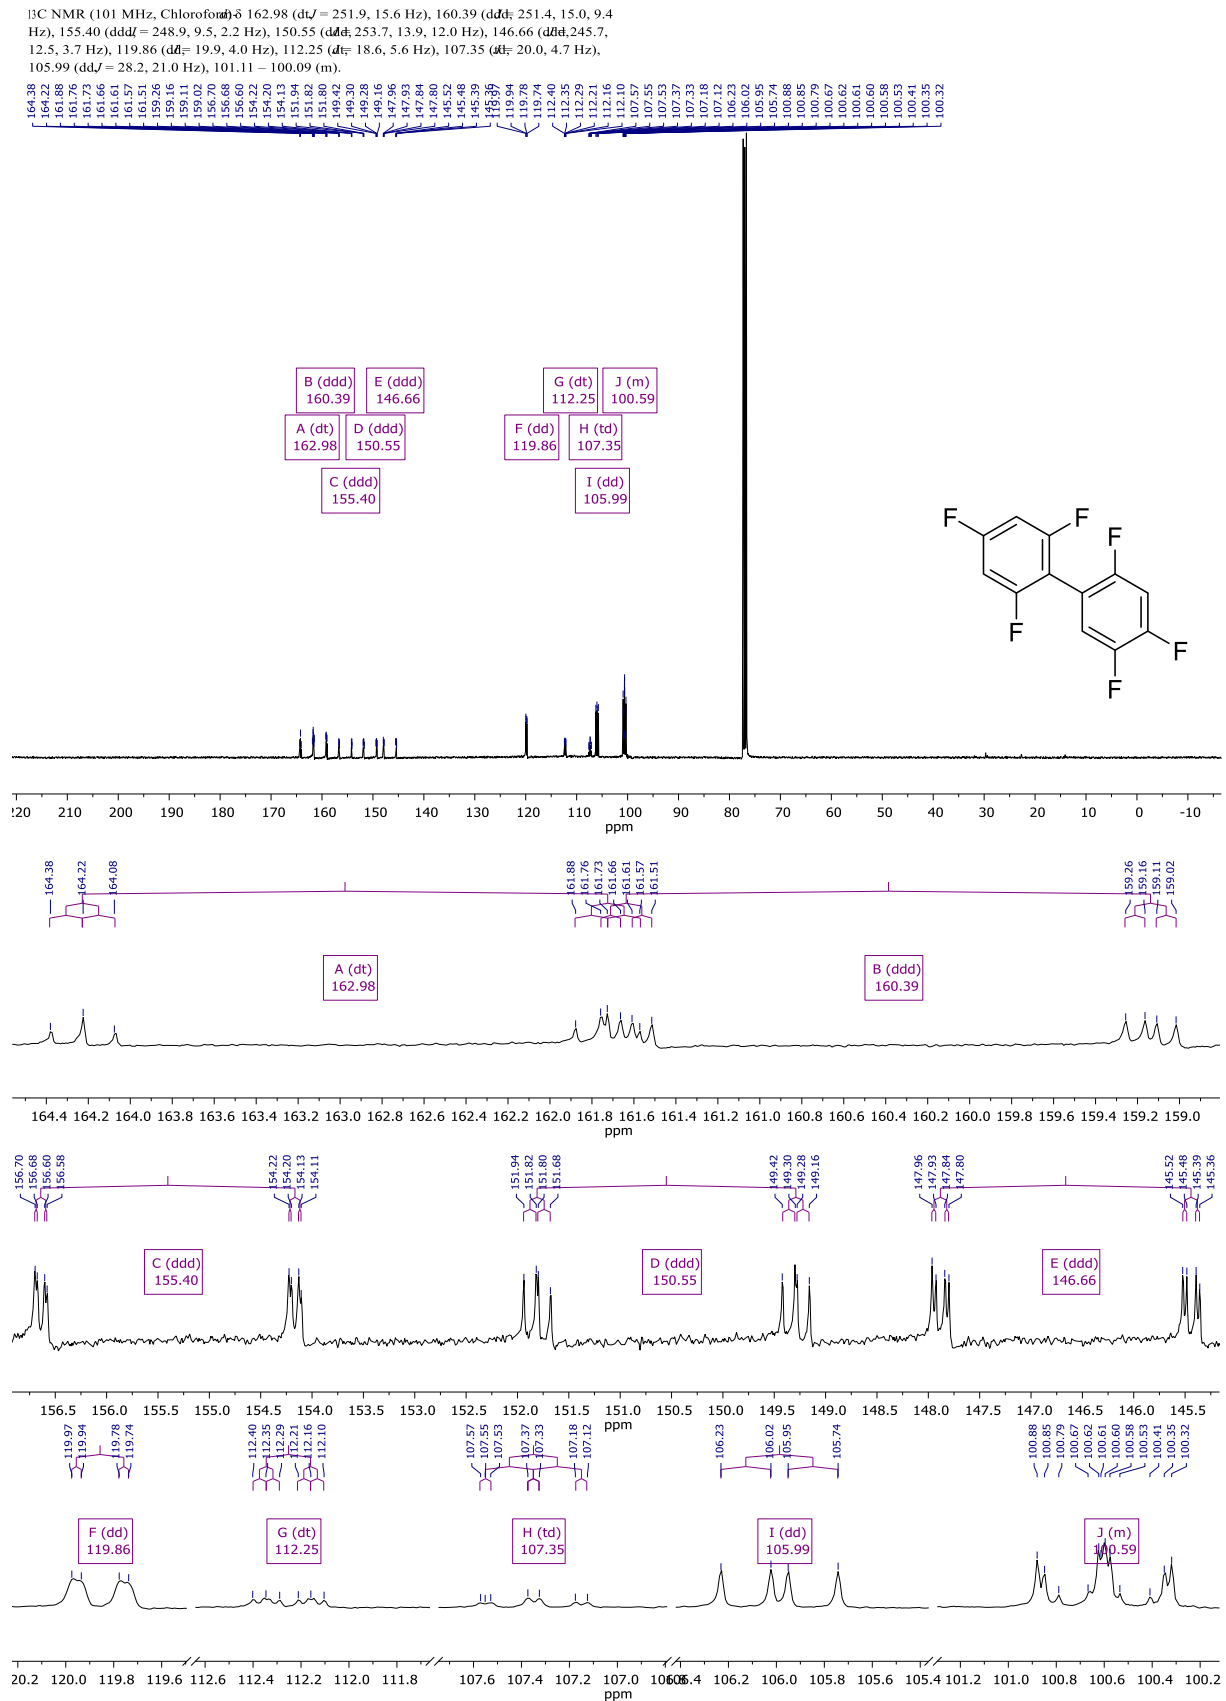Figure S55  $^{13}\text{C}$  NMR: 2,2',4,4',5,6'-Hexafluoro-1,1'-biphenyl

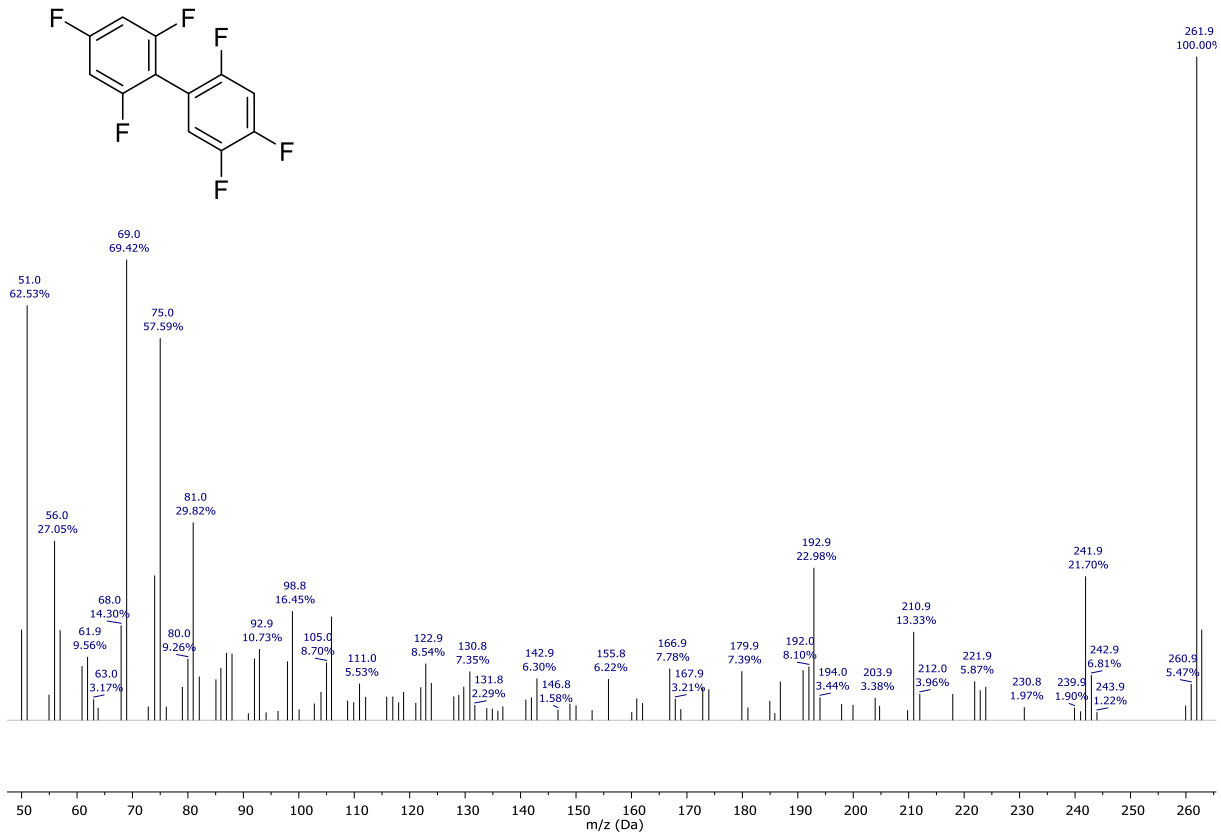Figure S56 EI-Spectrum (EI<sup>+</sup>): 2,2',4,4',5,6'-Hexafluoro-1,1'-biphenyl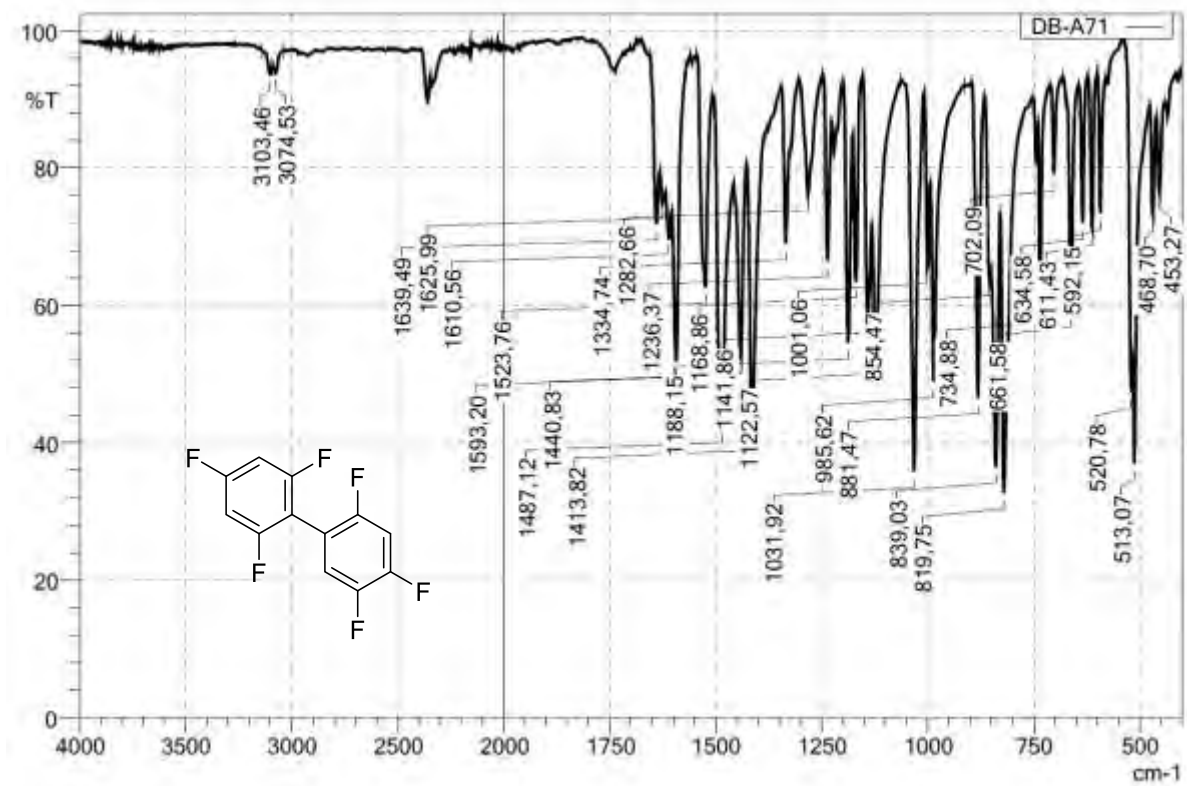

Figure S57 IR (ATR)-Spectrum: 2,2',4,4',5,6'-Hexafluoro-1,1'-biphenyl

**2,2',3,4,4',5,6'-Heptafluoro-1,1'-biphenyl (27)**

<sup>1</sup>H NMR (400 MHz, Chloroform-d) δ 7.04 – 6.95 (m, 1H), 6.86 – 6.76 (m, 2H).

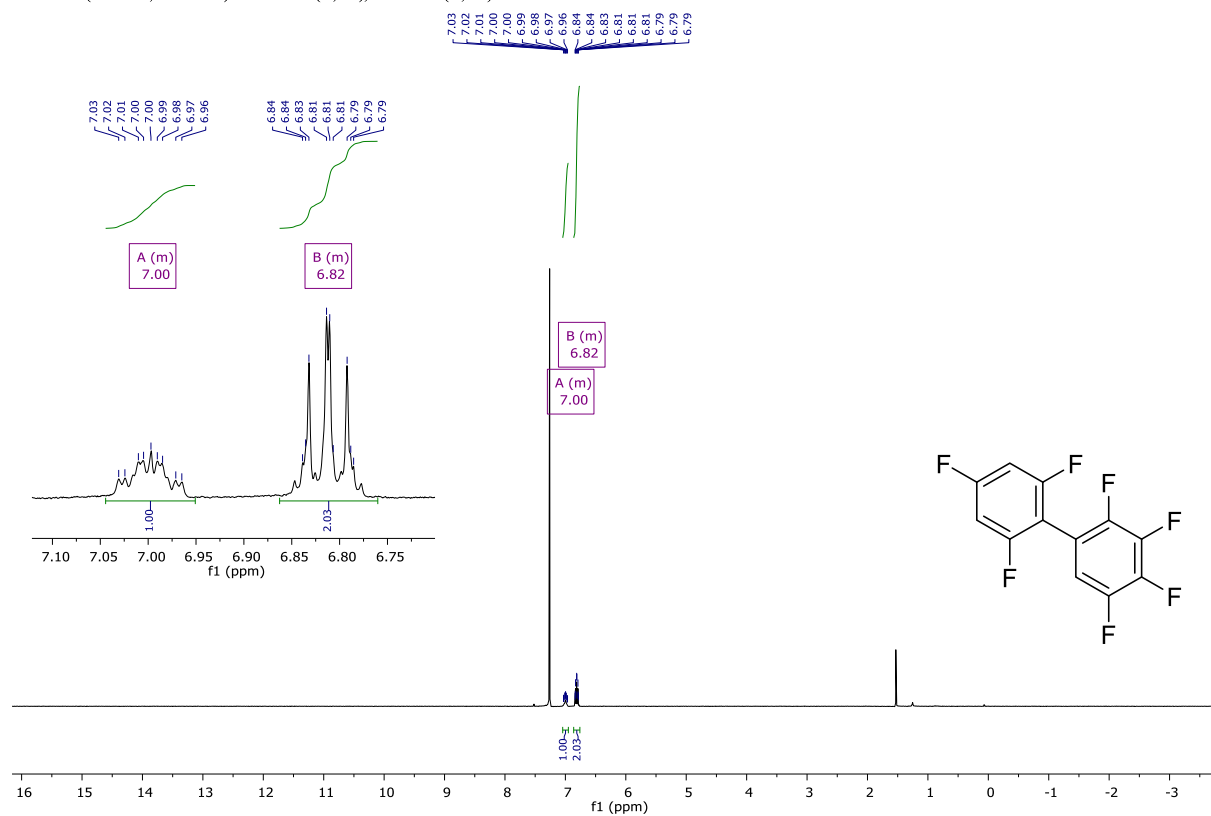

Figure S58 <sup>1</sup>H-NMR: 2,2',3,4,4',5,6'-Heptafluoro-1,1'-biphenyl

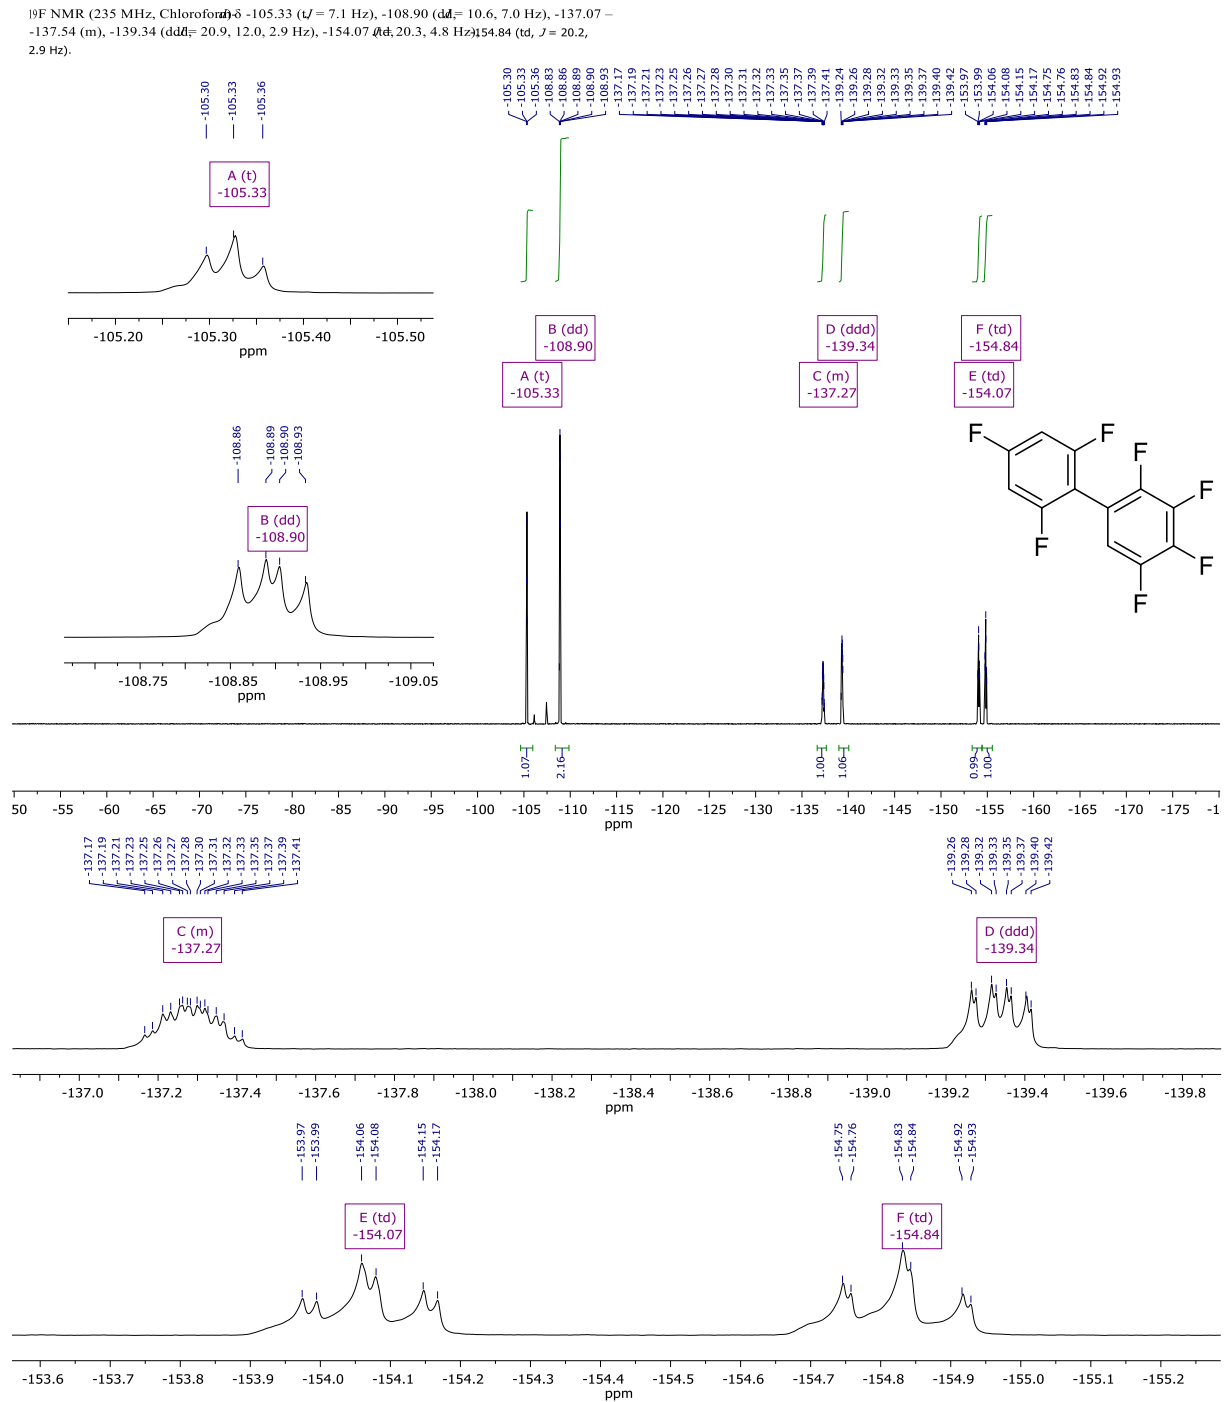Figure S59  $^{19}\text{F}$ -NMR  $\{^1\text{H}\}$ : 2,2',3,4,4',5,6'-Heptafluoro-1,1'-biphenyl

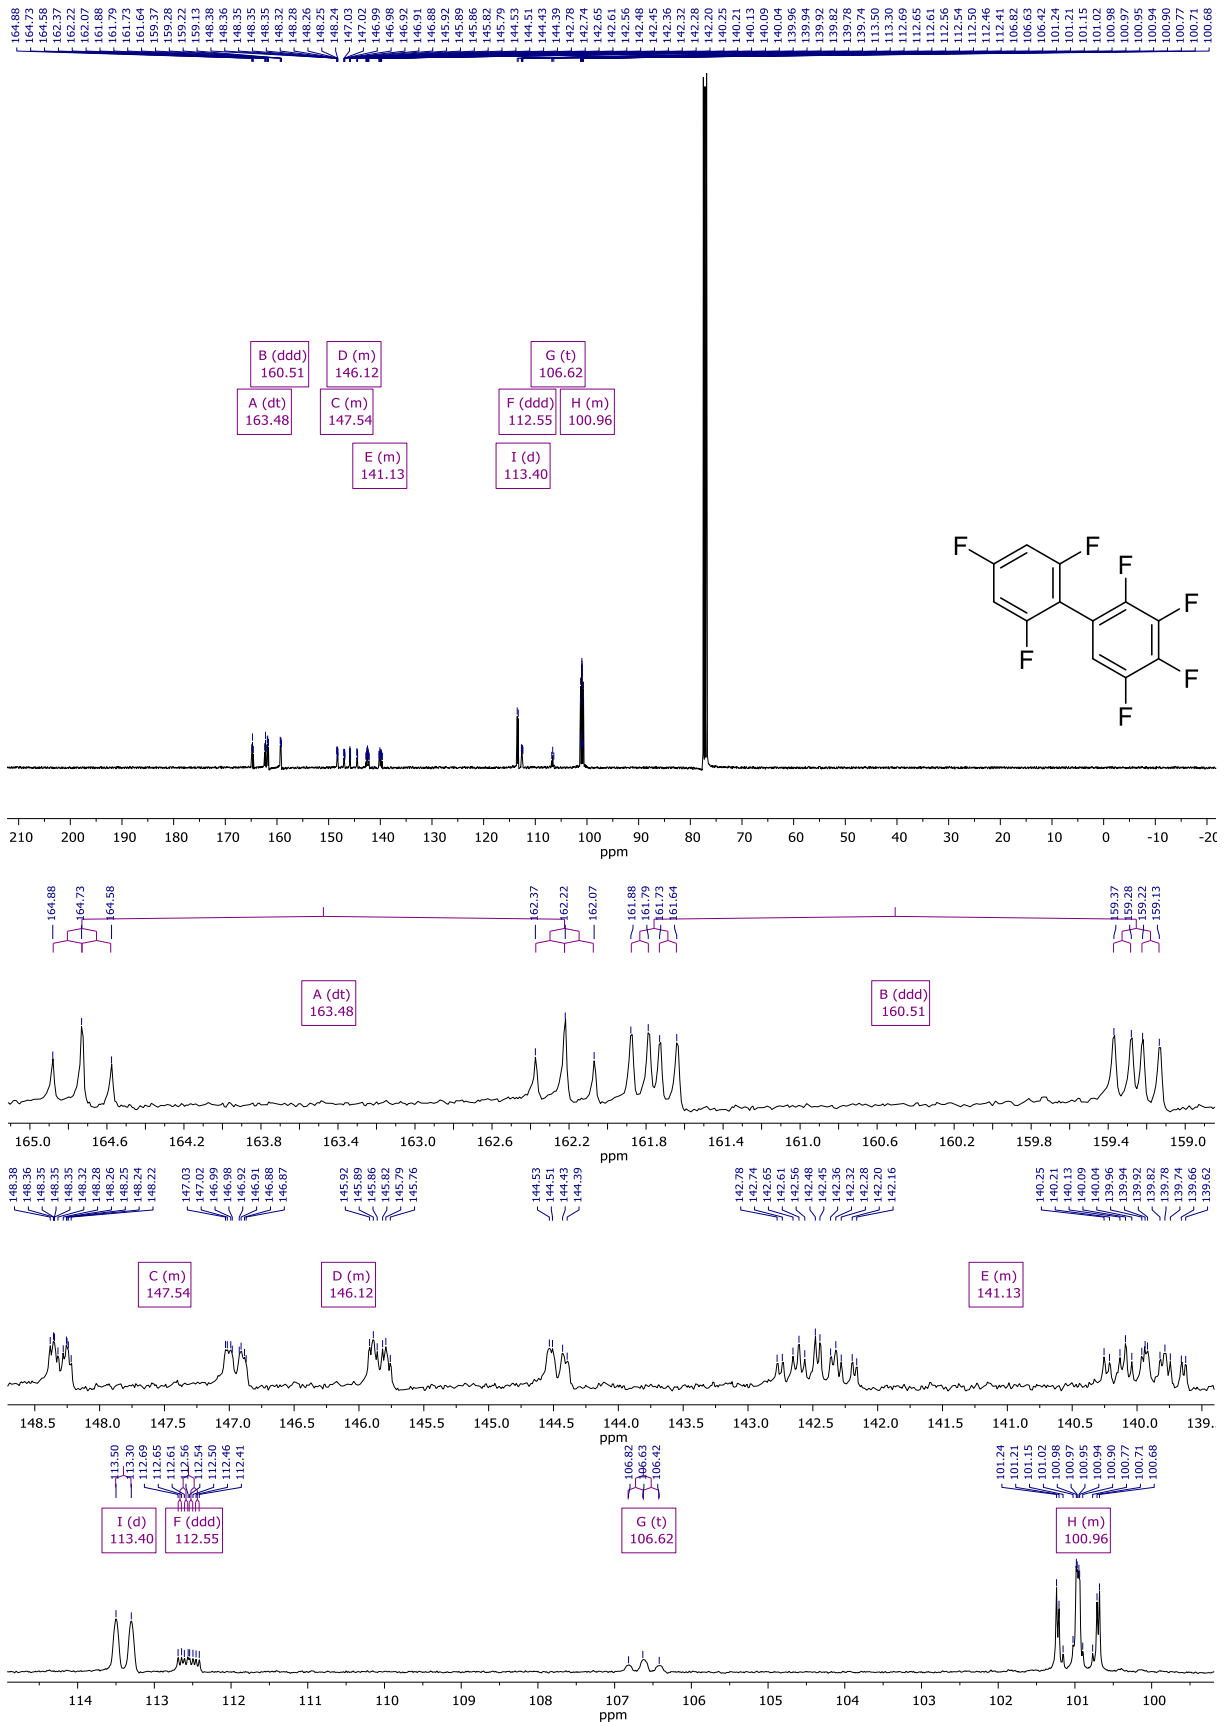Figure S60 <sup>13</sup>C NMR: 2,2',3,4,4',5,6'-Heptafluoro-1,1'-biphenyl

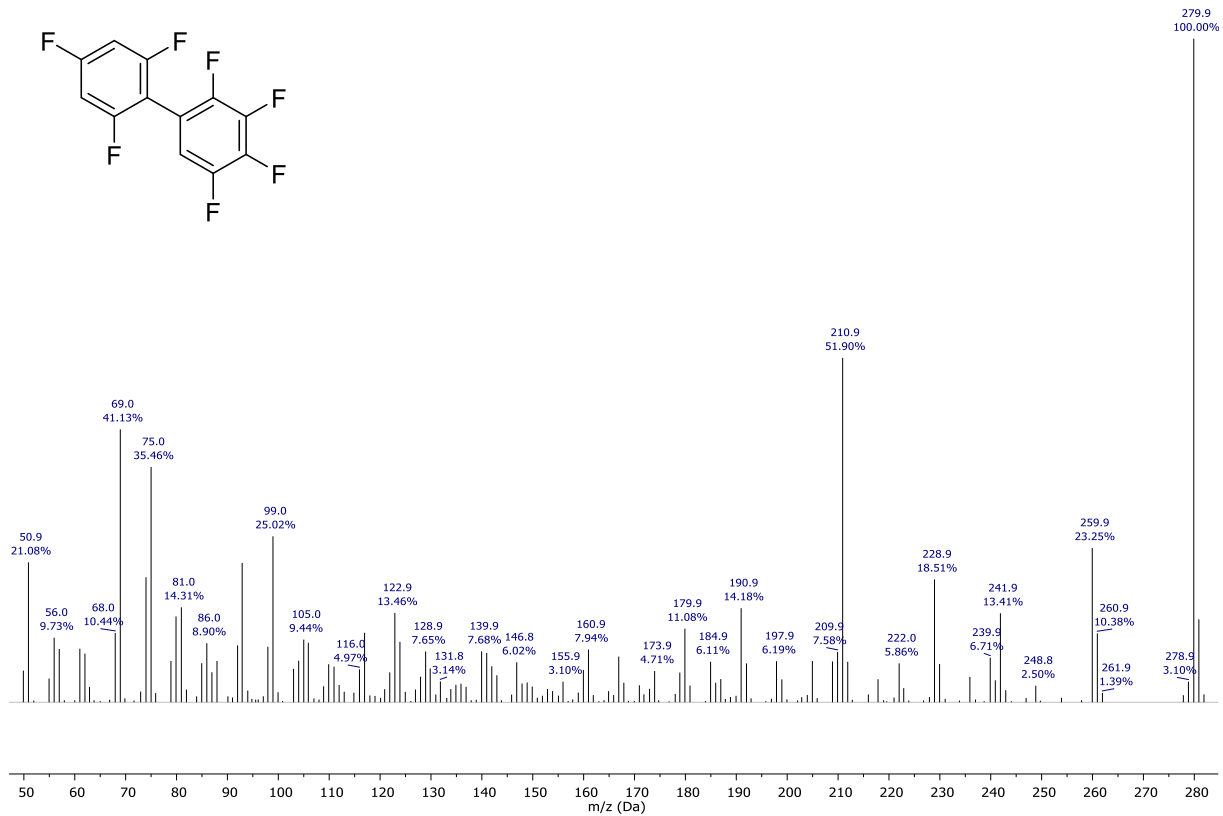Figure S61 EI-Spectrum (EI<sup>+</sup>): 2,2',3,4,4',5,6'-Heptafluoro-1,1'-biphenyl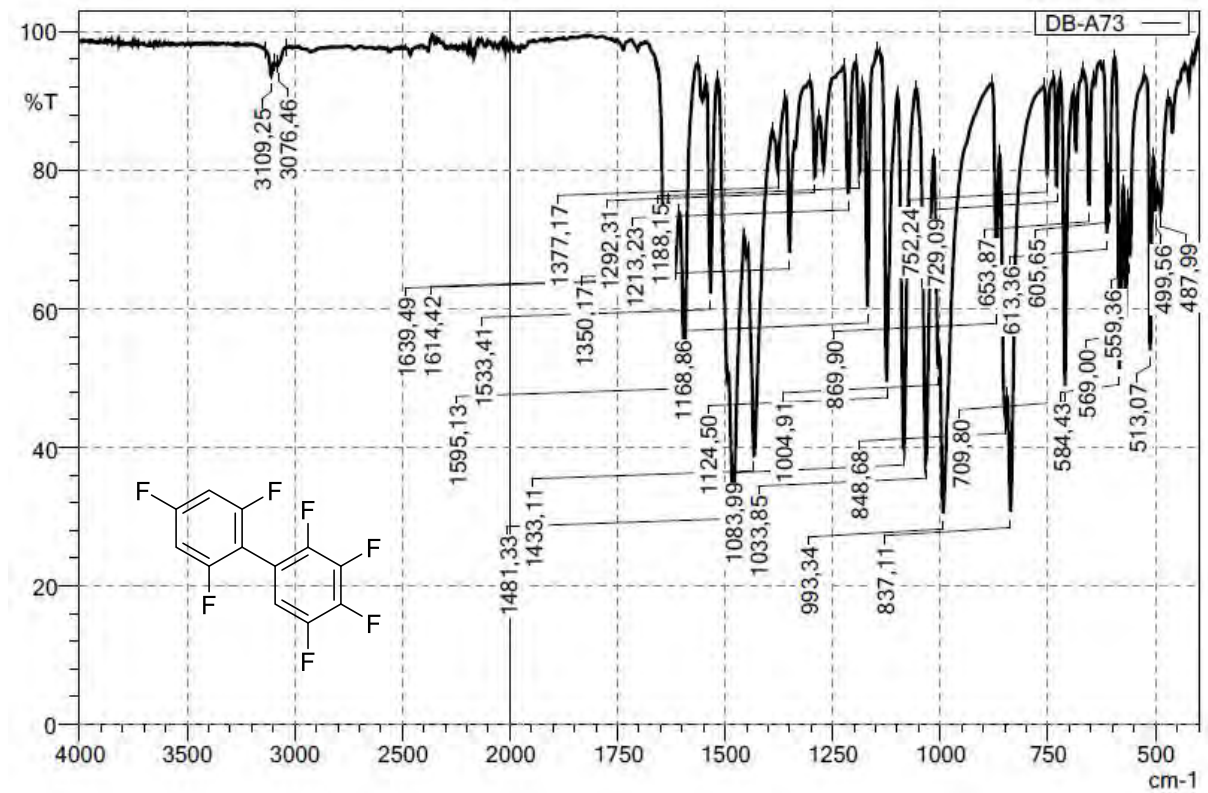

Figure S62 IR (ATR)-Spectrum: 2,2',3,4,4',5,6'-Heptafluoro-1,1'-biphenyl

## 2,3,3',4,4',5',6-Heptafluoro-1,1'-biphenyl (28)

$^1\text{H NMR}$  (400 MHz,  $\text{CDCl}_3$ )  $\delta$  7.09 (ddd,  $J = 7.5, 6.4, 1.3$  Hz, 1H), 6.91 (tdd, 9.8, 6.1, 2.5 Hz, 1H).

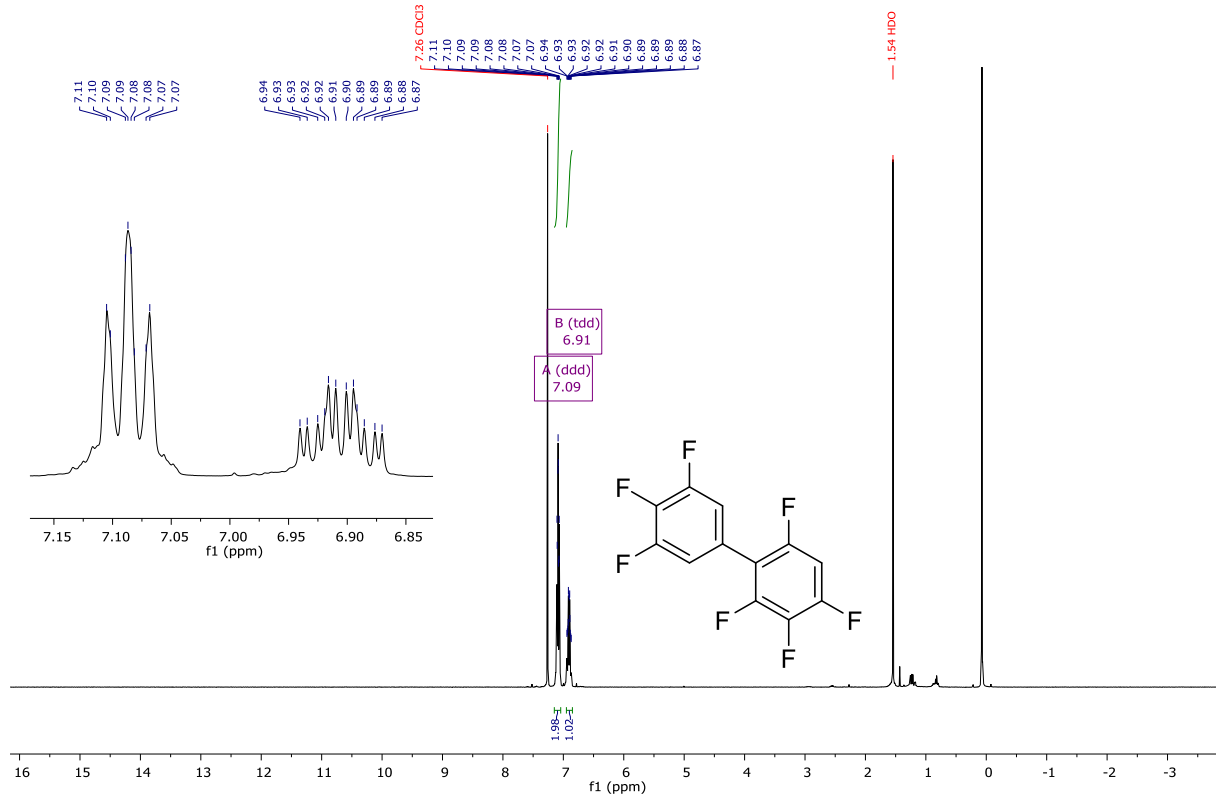Figure S63  $^1\text{H-NMR}$ : 2,3,3',4,4',5',6-Heptafluoro-1,1'-biphenyl

$^{19}\text{F NMR}$  (377 MHz,  $\text{CDCl}_3$ )  $\delta$  -117.81 (dd,  $J = 11.1, 2.2$  Hz), -130.78 (ddt, 21.7, 6.4, 2.4 Hz), -133.65 (d, 20.5 Hz), -135.04 (dd, 21.3, 6.3 Hz), -158.96 (t, 20.6 Hz), -163.61 (ddd, 21.2, 10.9 Hz).

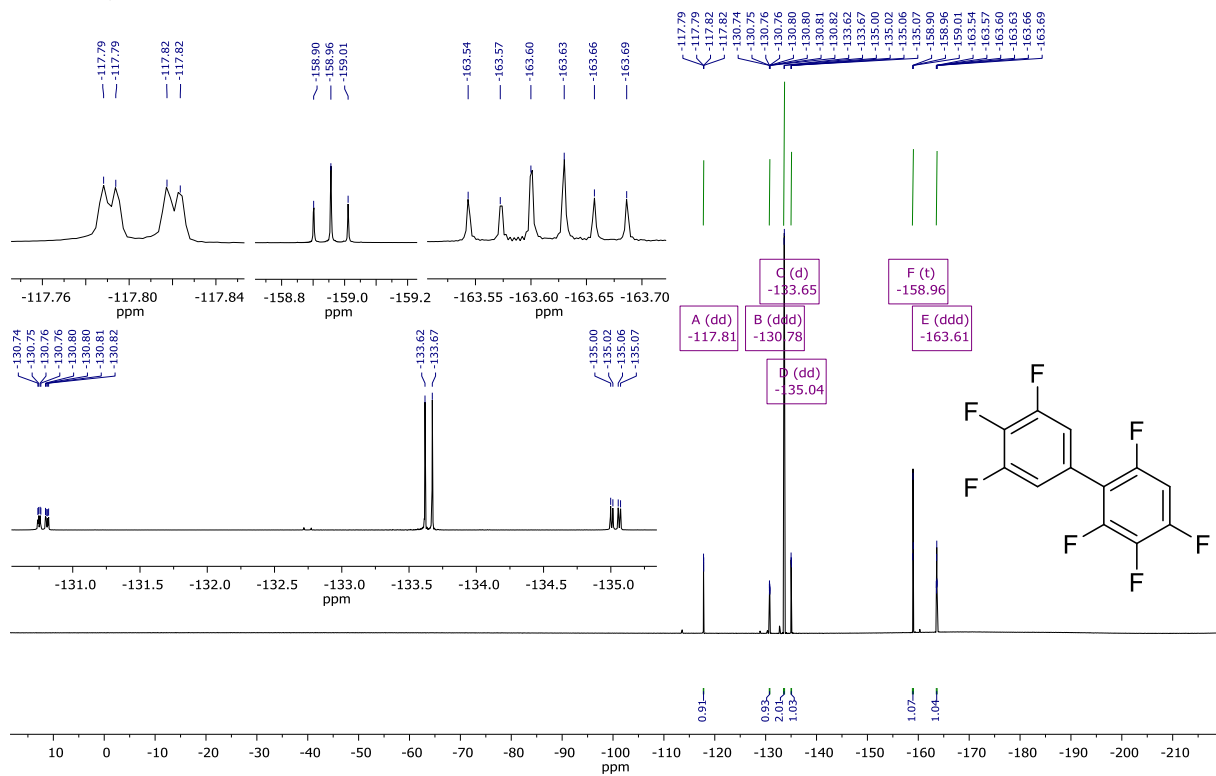Figure S64  $^{19}\text{F-NMR}$   $\{^1\text{H}\}$ : 2,3,3',4,4',5',6-Heptafluoro-1,1'-biphenyl



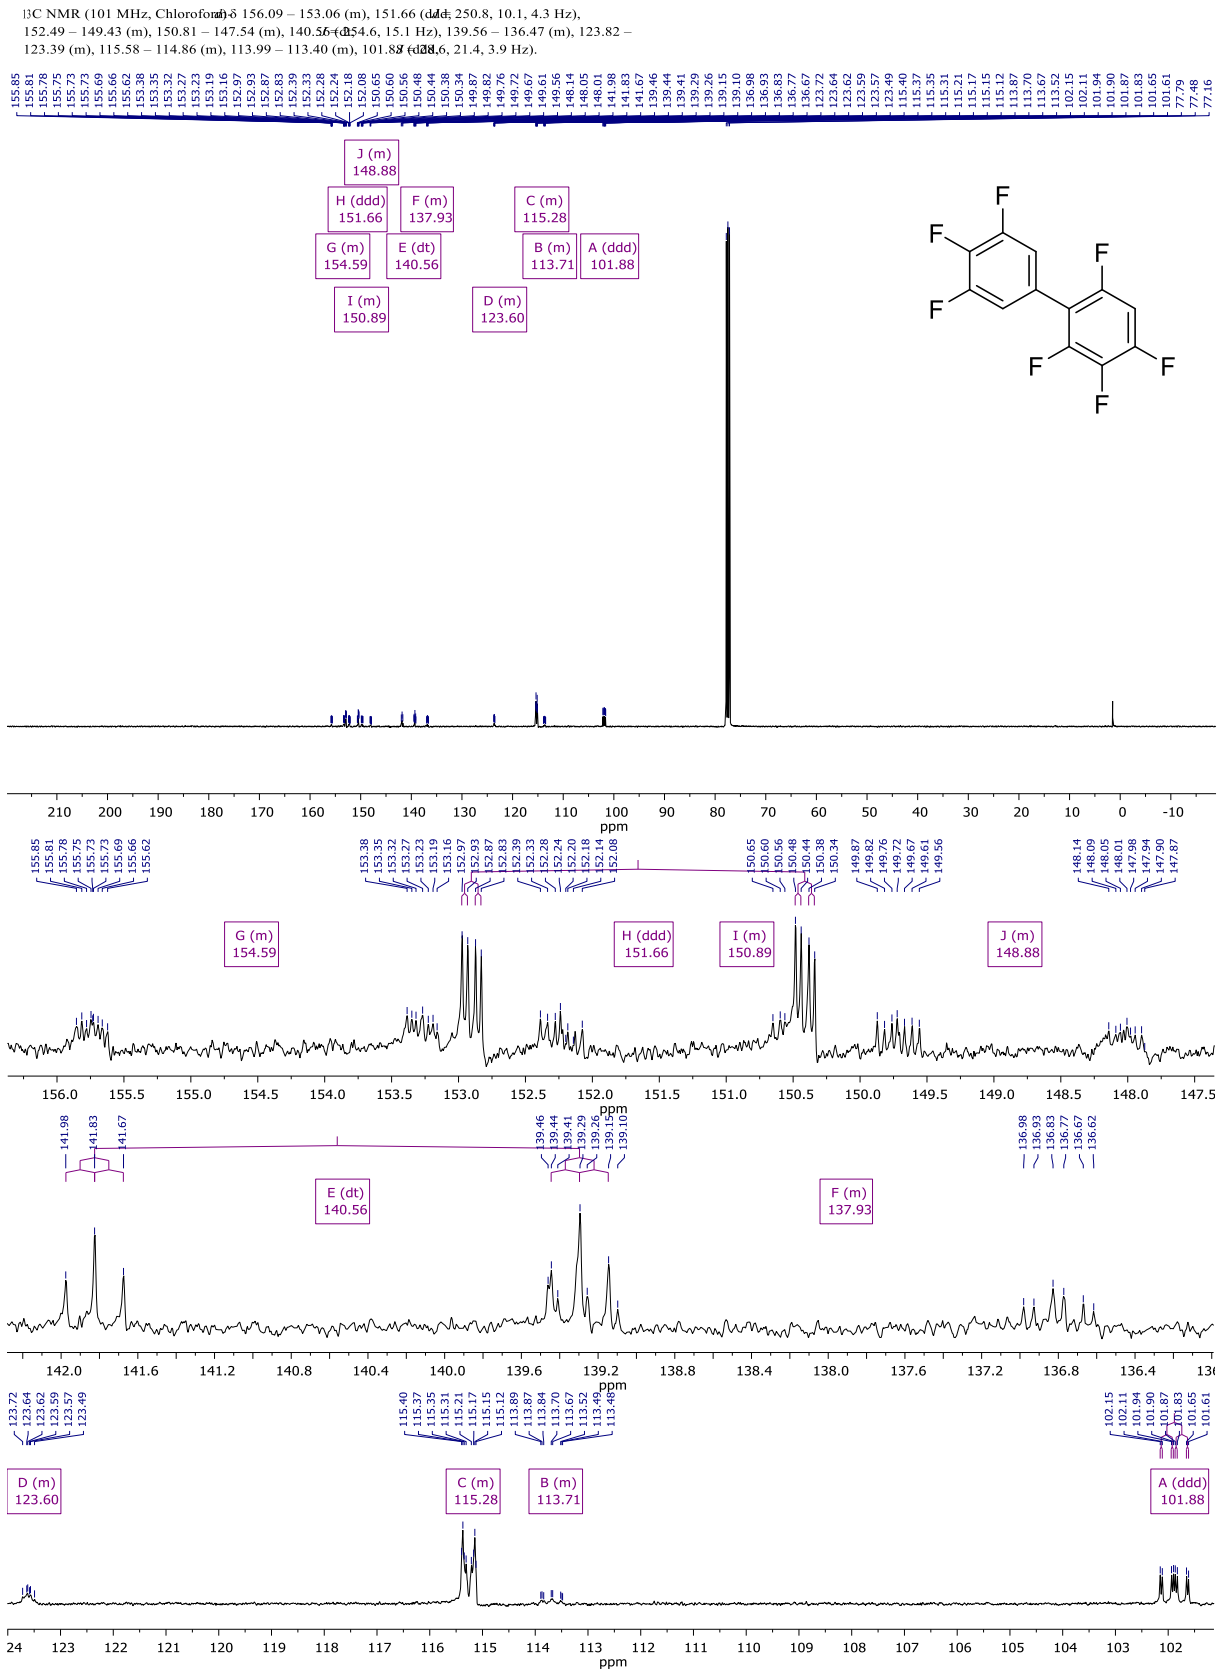Figure S65  $^{13}\text{C}$  NMR: 2,3,3',4,4',5',6-Heptafluoro-1,1'-biphenyl

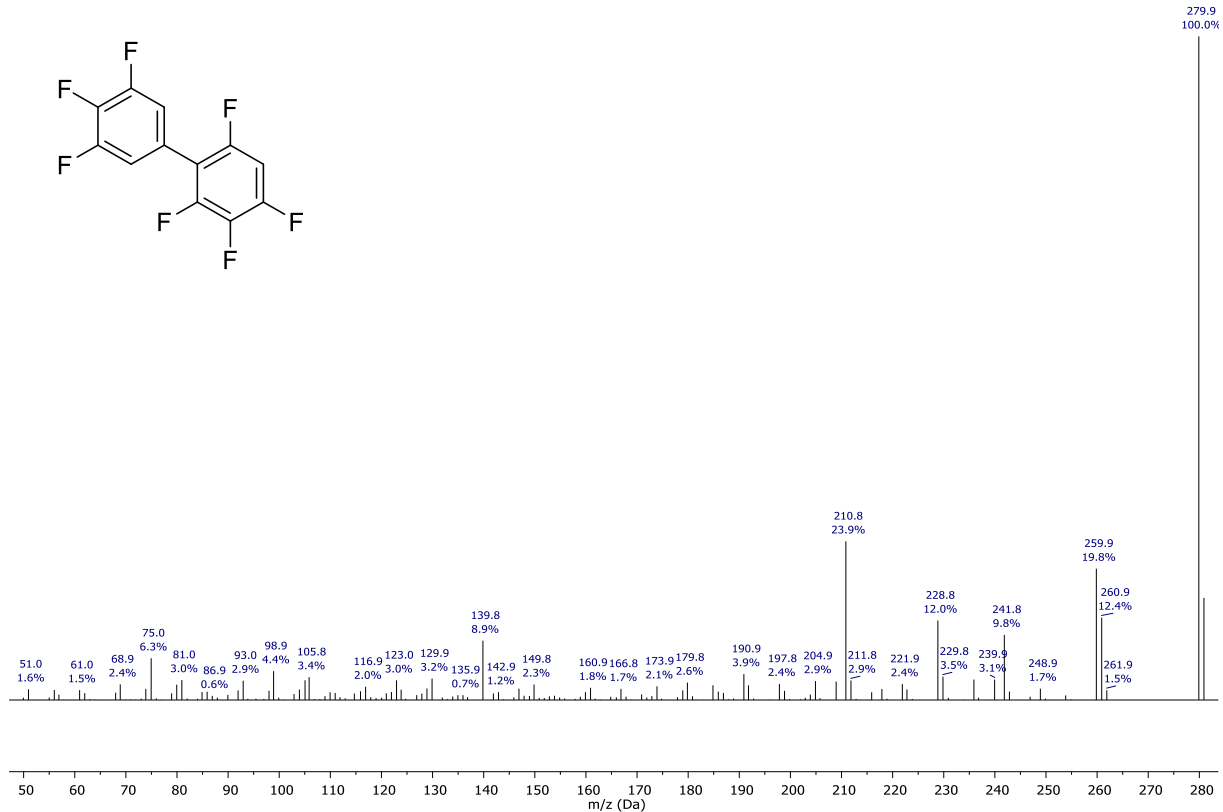Figure S66 EI-Spectrum (EI<sup>+</sup>): 2,3,3',4,4',5',6-Heptafluoro-1,1'-biphenyl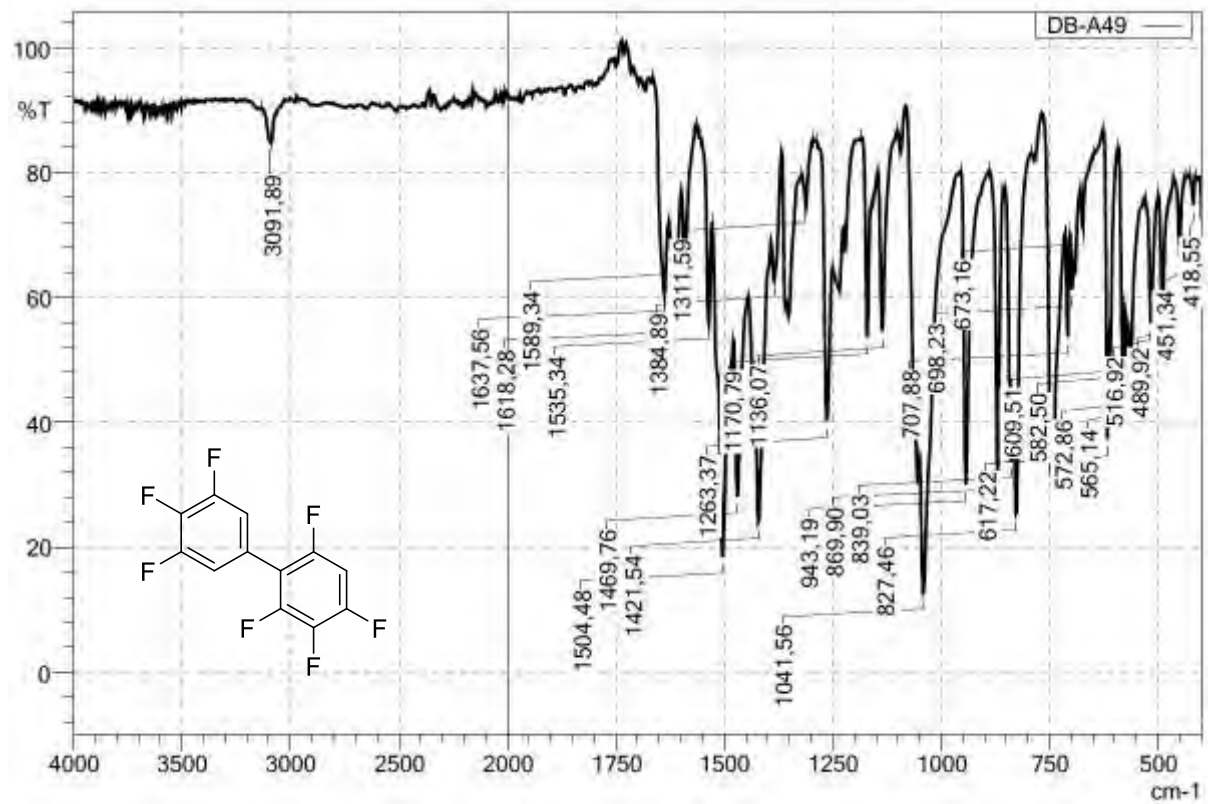

Figure S67 2,3,3',4,4',5',6-Heptafluoro-1,1'-biphenyl

### 3,3',4,4',5,5'-Hexafluoro-1,1'-biphenyl (4)

$^1\text{H NMR}$  (400 MHz, Chloroform- $d_3$ )  $\delta$  7.22 – 6.96 (m, 1H).

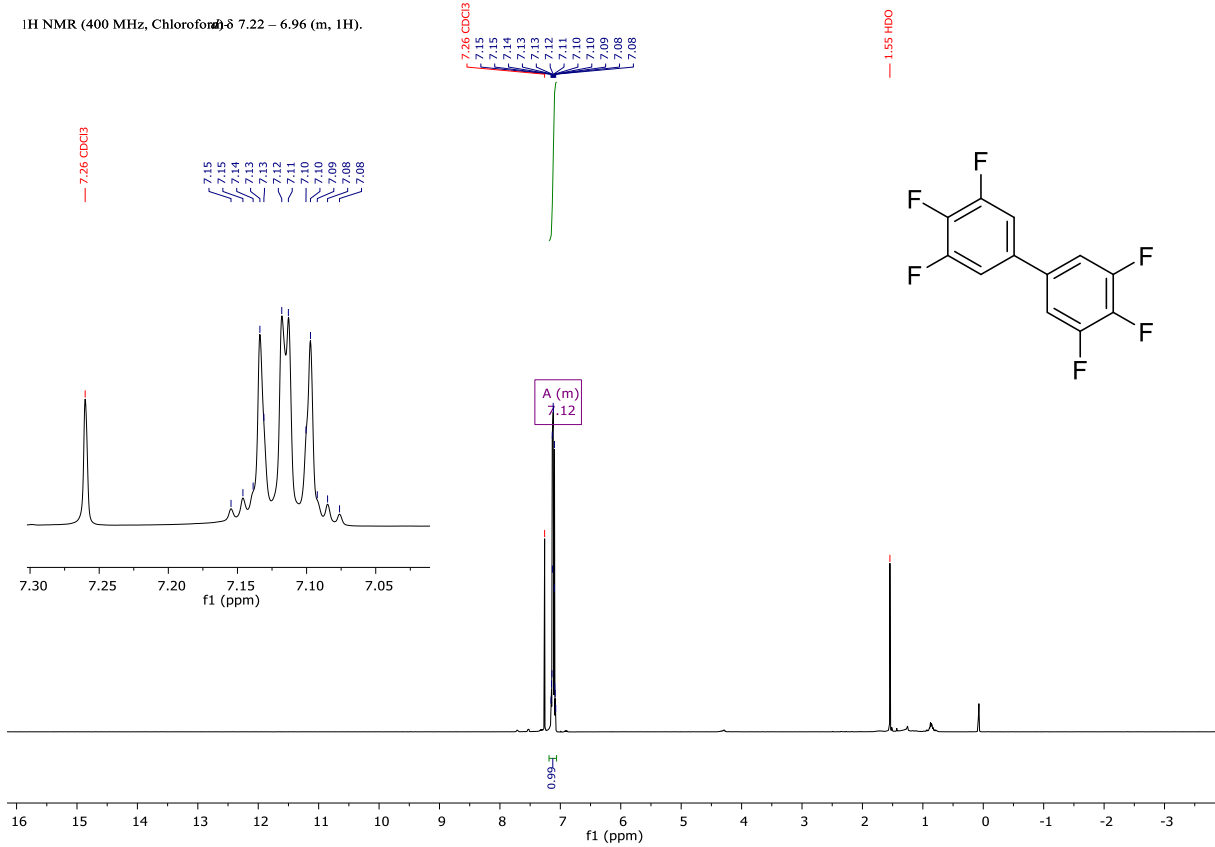

Figure S68  $^1\text{H-NMR}$ : 3,3',4,4',5,5'-Hexafluoro-1,1'-biphenyl

$^{19}\text{F NMR}$  (377 MHz, Chloroform- $d_3$ )  $\delta$  -132.75 (d,  $J = 20.7$  Hz), -160.30 (t,  $J = 20.4$  Hz).

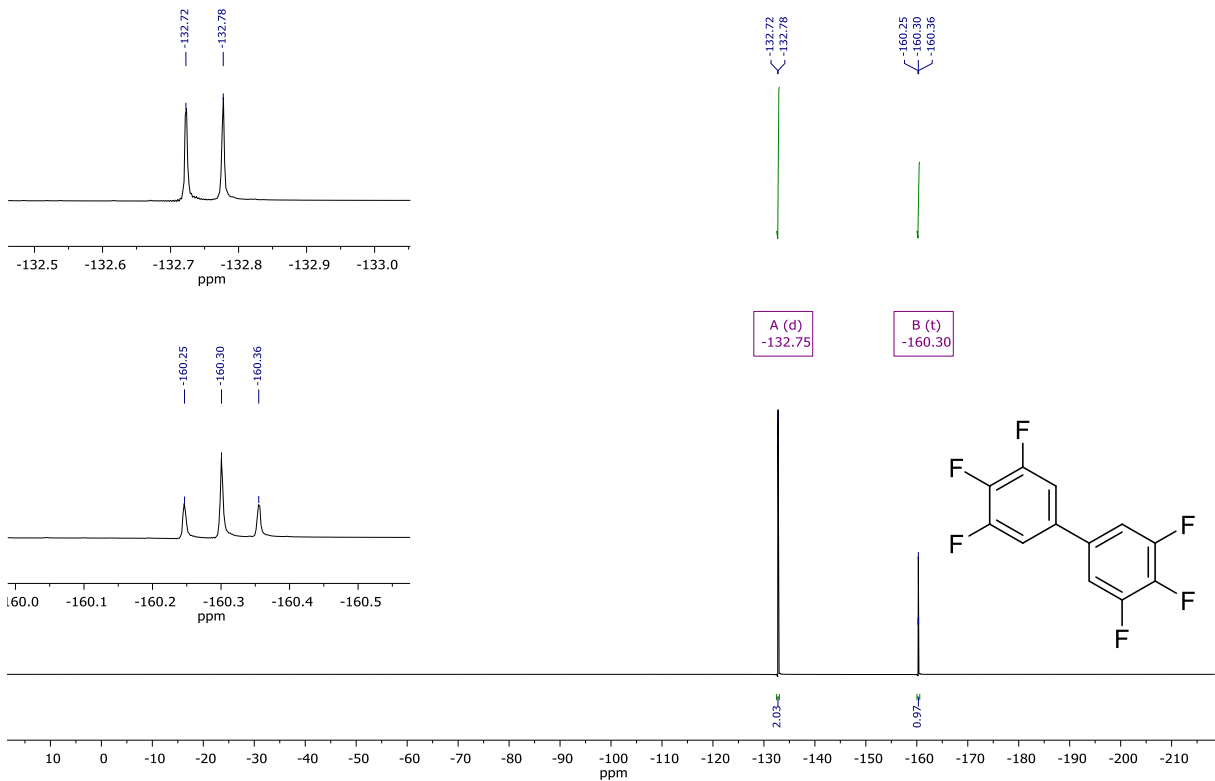

Figure S69  $^{19}\text{F-NMR}$   $\{^1\text{H}\}$ : 3,3',4,4',5,5'-Hexafluoro-1,1'-biphenyl

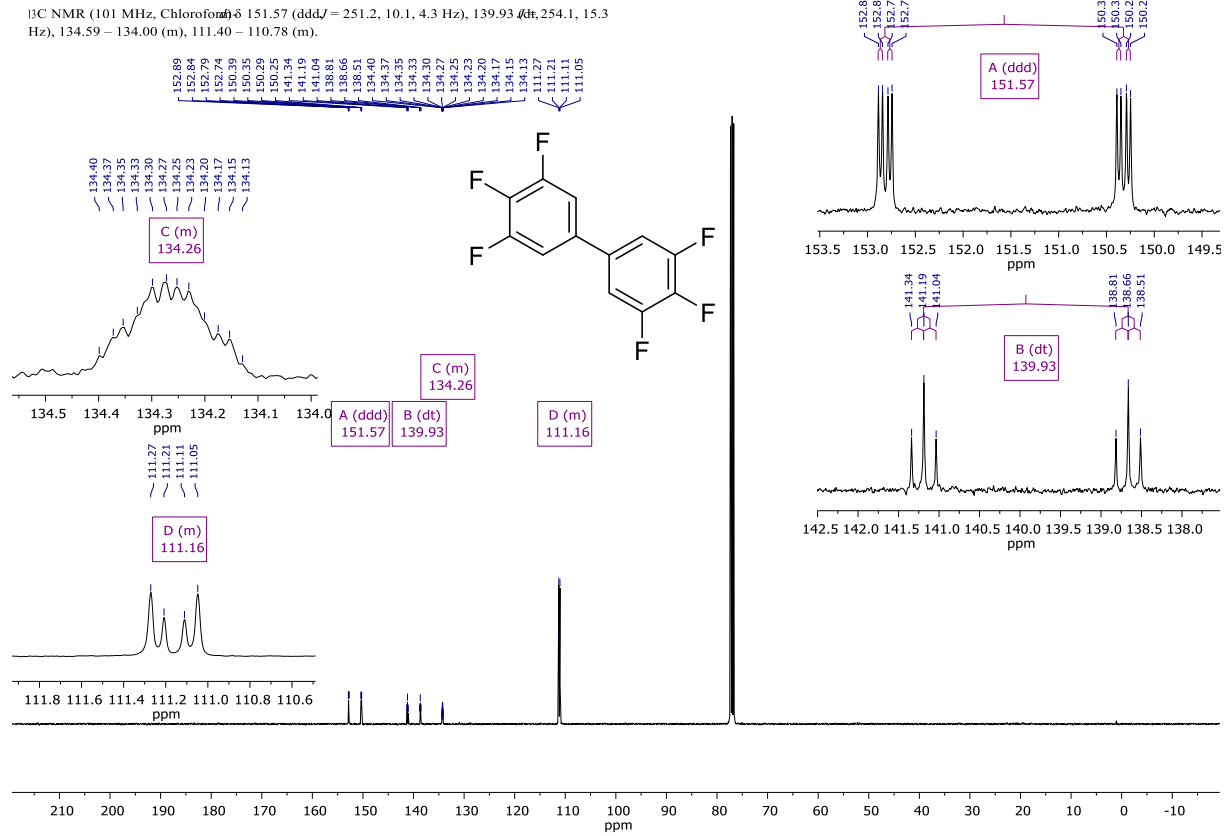Figure S70  $^{13}\text{C}$  NMR: 3,3',4,4',5,5'-Hexafluoro-1,1'-biphenyl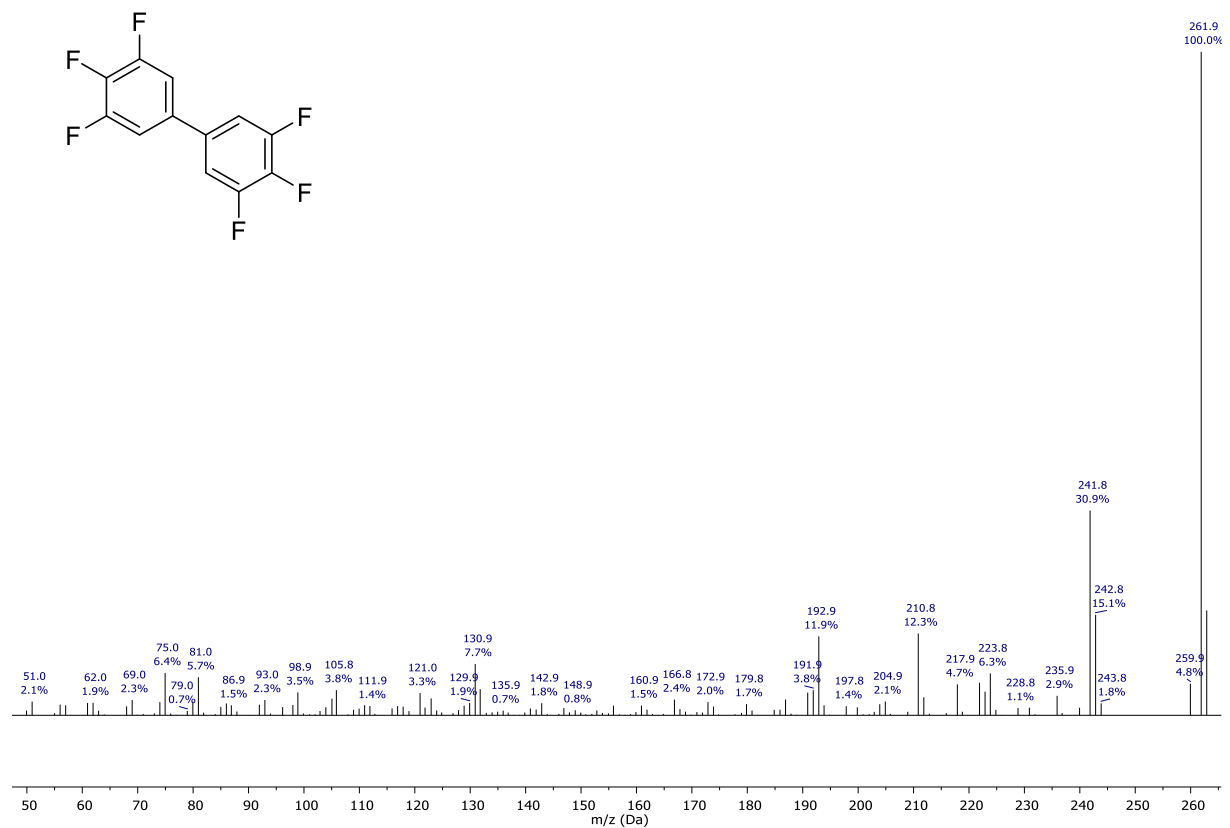Figure S71 EI-Spectrum (EI $^+$ ): 3,3',4,4',5,5'-Hexafluoro-1,1'-biphenyl

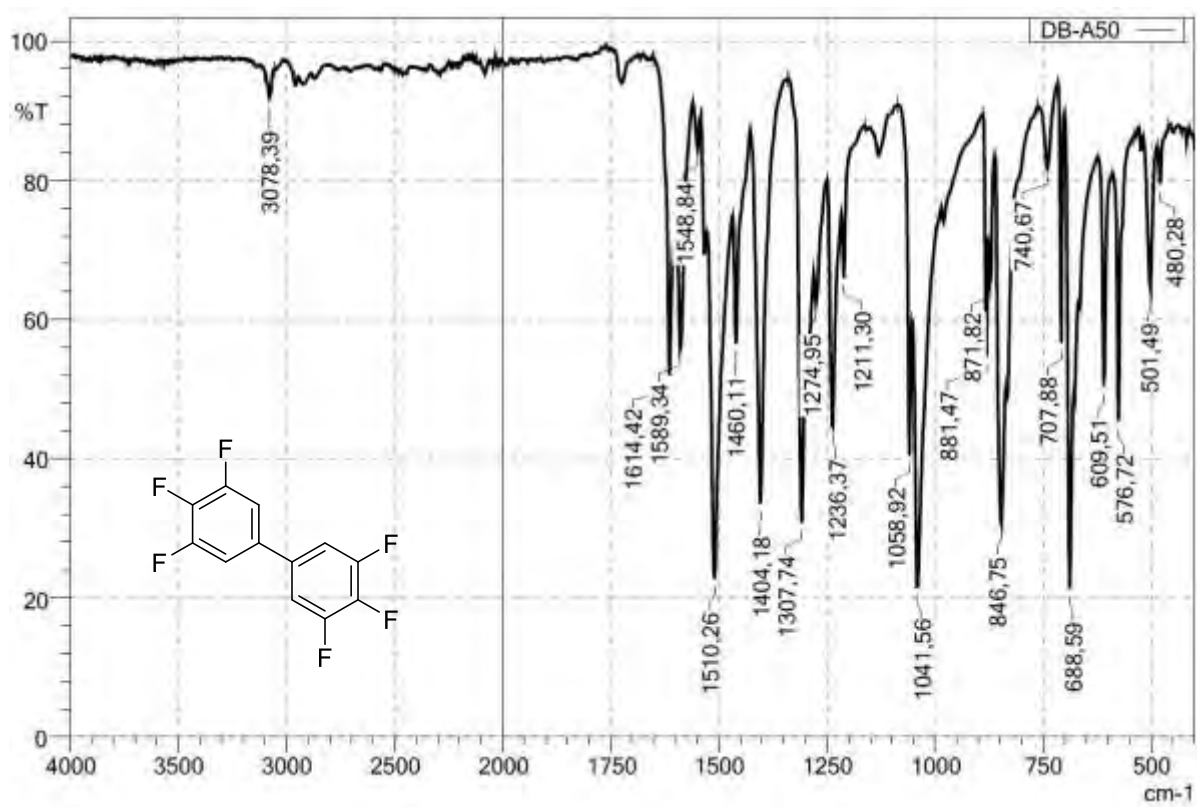

Figure S72 IR (ATR)-Spectrum: 3,3',4,4',5,5'-Hexafluoro-1,1'-biphenyl

## 2,3',4,4',5,5'-Hexafluoro-1,1'-biphenyl (29)

$^1\text{H NMR}$  (400 MHz, Chloroform- $d_3$ )  $\delta$  7.21 (ddd,  $J = 10.5, 8.5, 7.0$  Hz, 1H), 7.17 – 7.09 (m, 2H), 7.05 (td,  $J = 9.9, 6.6$  Hz, 1H).

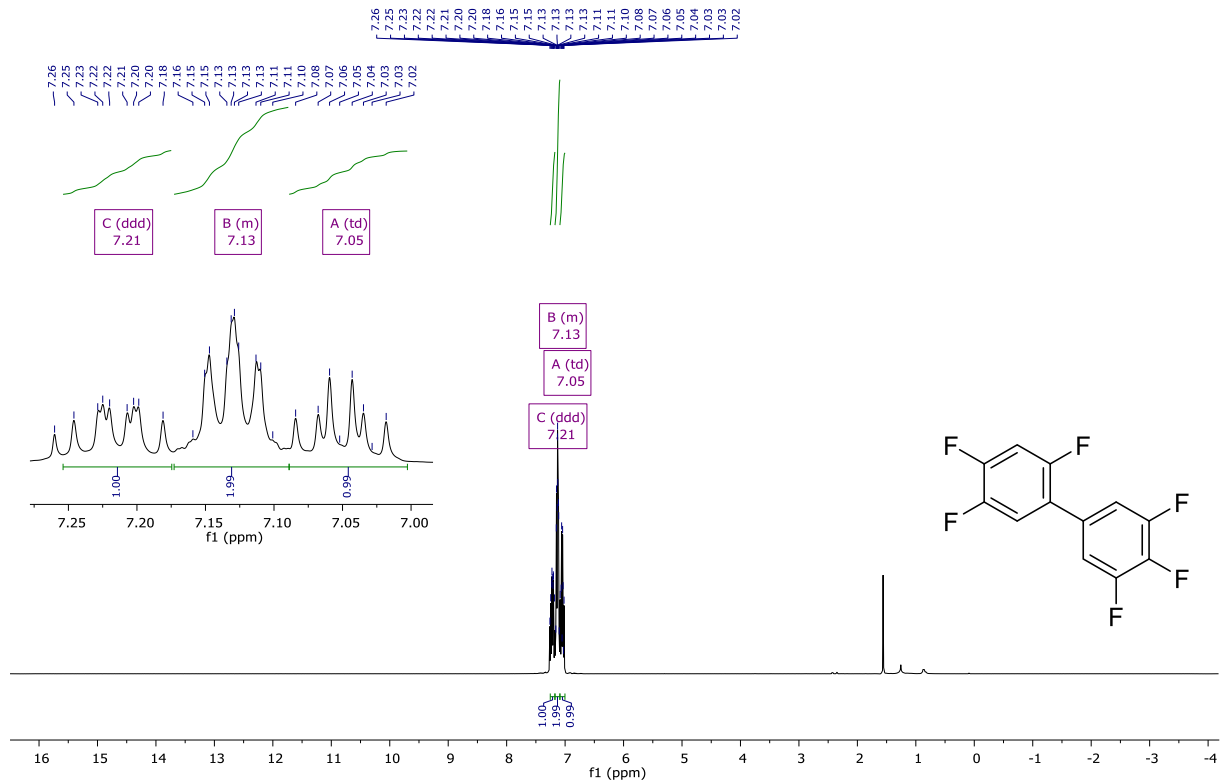Figure S73  $^1\text{H-NMR}$ : 2,3',4,4',5,5'-Hexafluoro-1,1'-biphenyl

$^{19}\text{F NMR}$  (235 MHz, Chloroform- $d_3$ )  $\delta$  -118.89 (dd,  $J = 15.3, 4.5$  Hz), -132.60 (dd,  $J = 21.6, 4.4$  Hz), -133.68 (dd,  $J = 20.5, 1.5$  Hz), -141.60 (dd,  $J = 21.5, 15.1$ ), -160.36 (t,  $J = 20.5$ ).

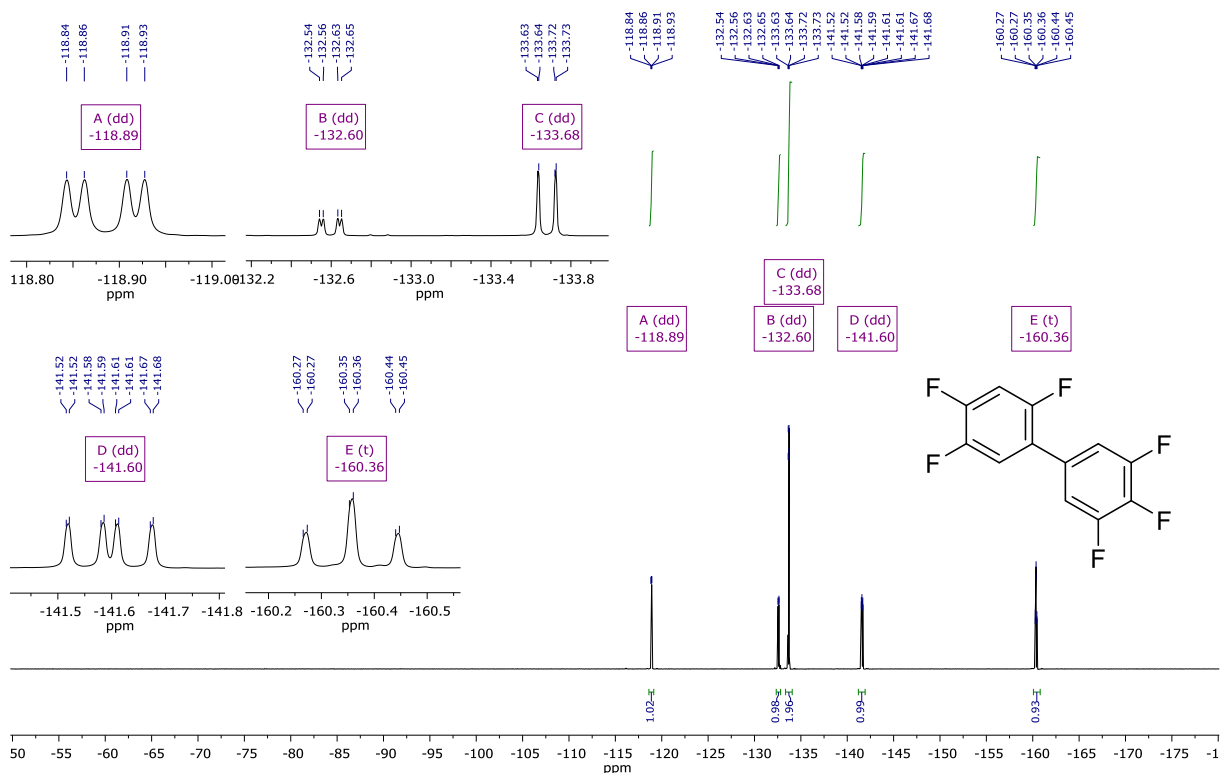Figure S74  $^{19}\text{F-NMR}$  [ $^1\text{H}$ ]: 2,3',4,4',5,5'-Hexafluoro-1,1'-biphenyl

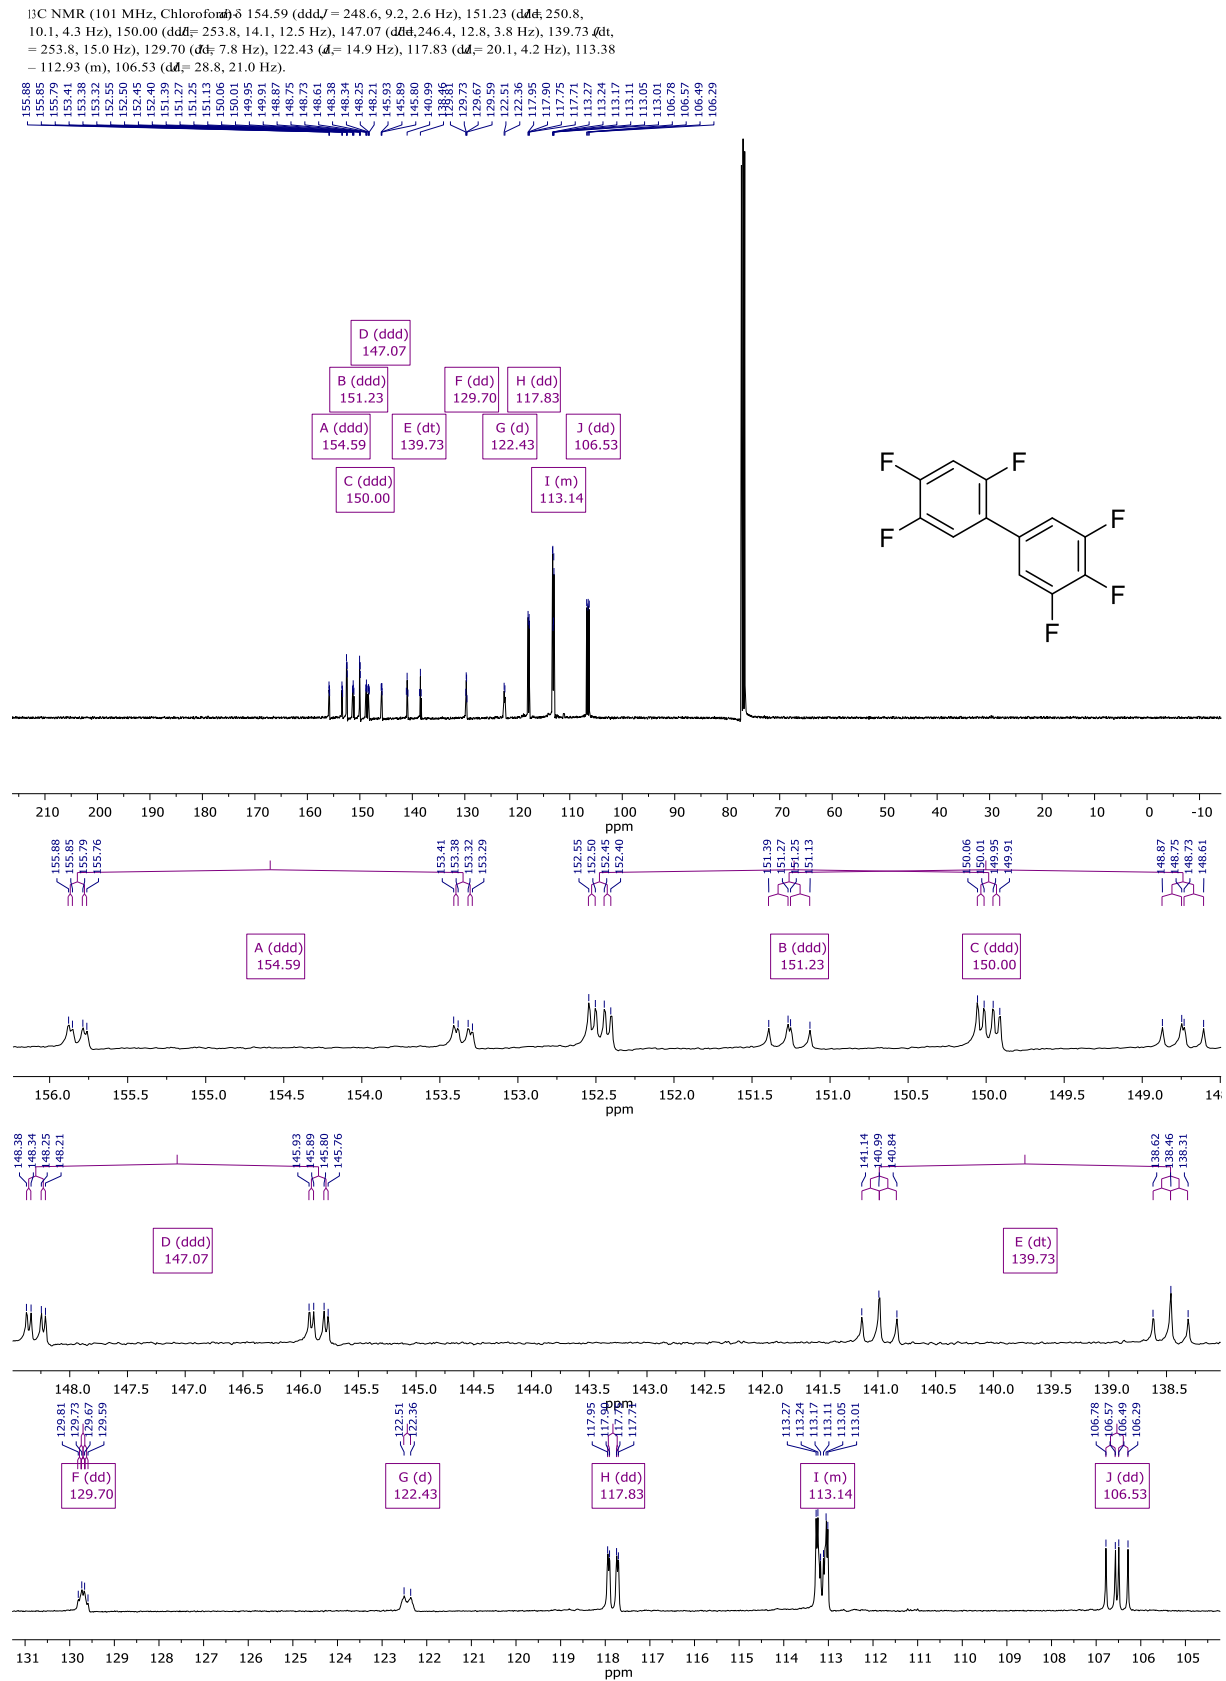Figure S75 <sup>13</sup>C NMR: 2,2',3,3',4,4',5,5'-Hexafluoro-1,1'-biphenyl

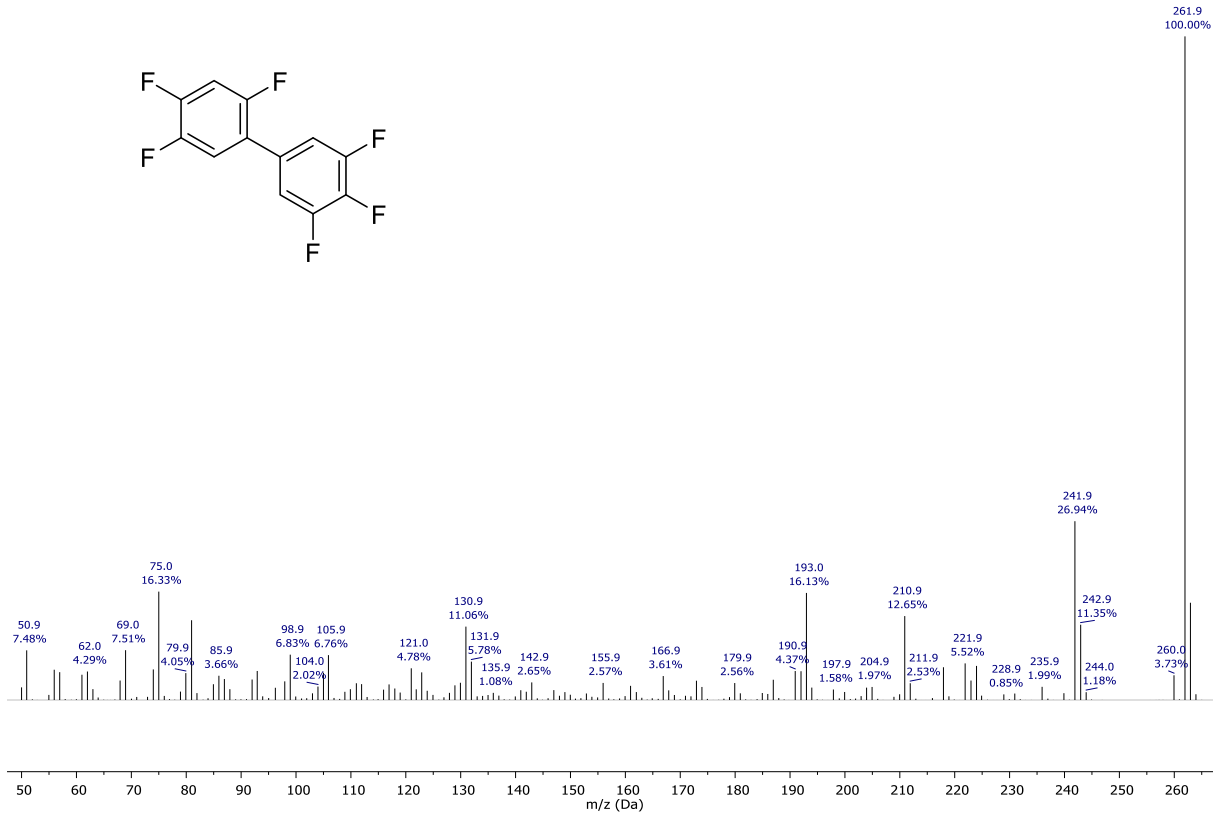Figure S76 EI-Spectrum (EI<sup>+</sup>): 2,3',4,4',5,5'-Hexafluoro-1,1'-biphenyl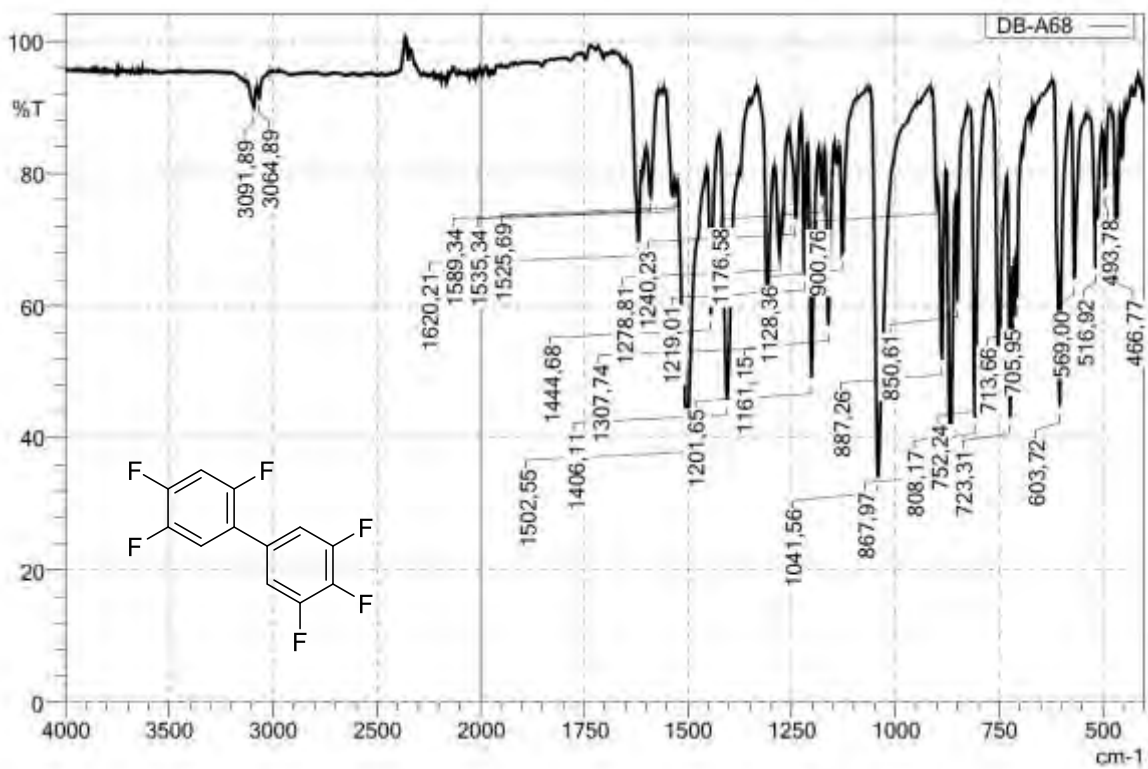

Figure S77 IR (ATR)-Spectrum: 2,3',4,4',5,5'-Hexafluoro-1,1'-biphenyl



## 2,2',4,4',5,5'-Hexafluoro-1,1'-biphenyl (30)

<sup>1</sup>H NMR (400 MHz, Chloroform-d) δ 7.17 – 7.07 (m, 2H), 7.02 – 6.91 (m, 2H).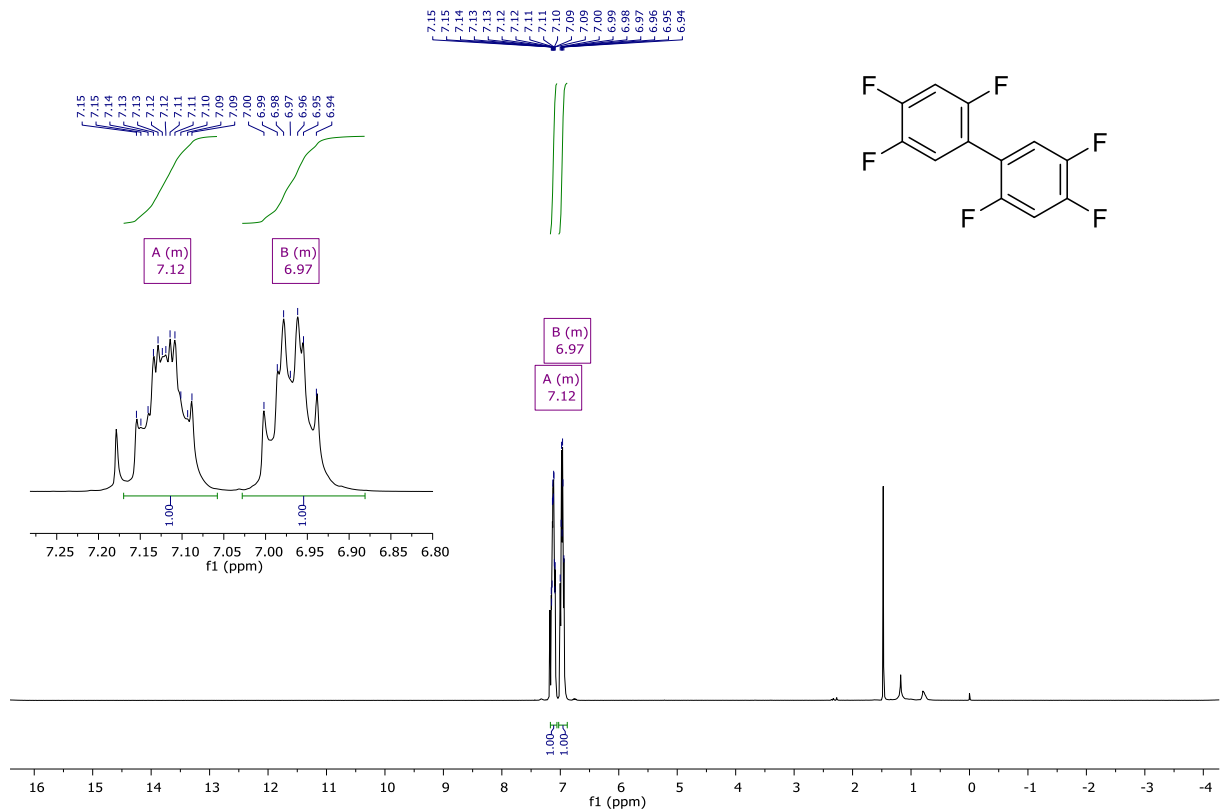Figure S78 <sup>1</sup>H-NMR: 2,2',4,4',5,5'-Hexafluoro-1,1'-biphenyl<sup>13</sup>C NMR (101 MHz, Chloroform-d) δ 155.08 (dd/ = 249.7, 9.6 Hz), 152.28 – 148.66 (m), 146.94 (ddd), J = 245.8, 12.7, 2.7 Hz), 119.38 – 119.01 (m), 118.12 – 117.71 (m), 106.92 – 105.71 (m).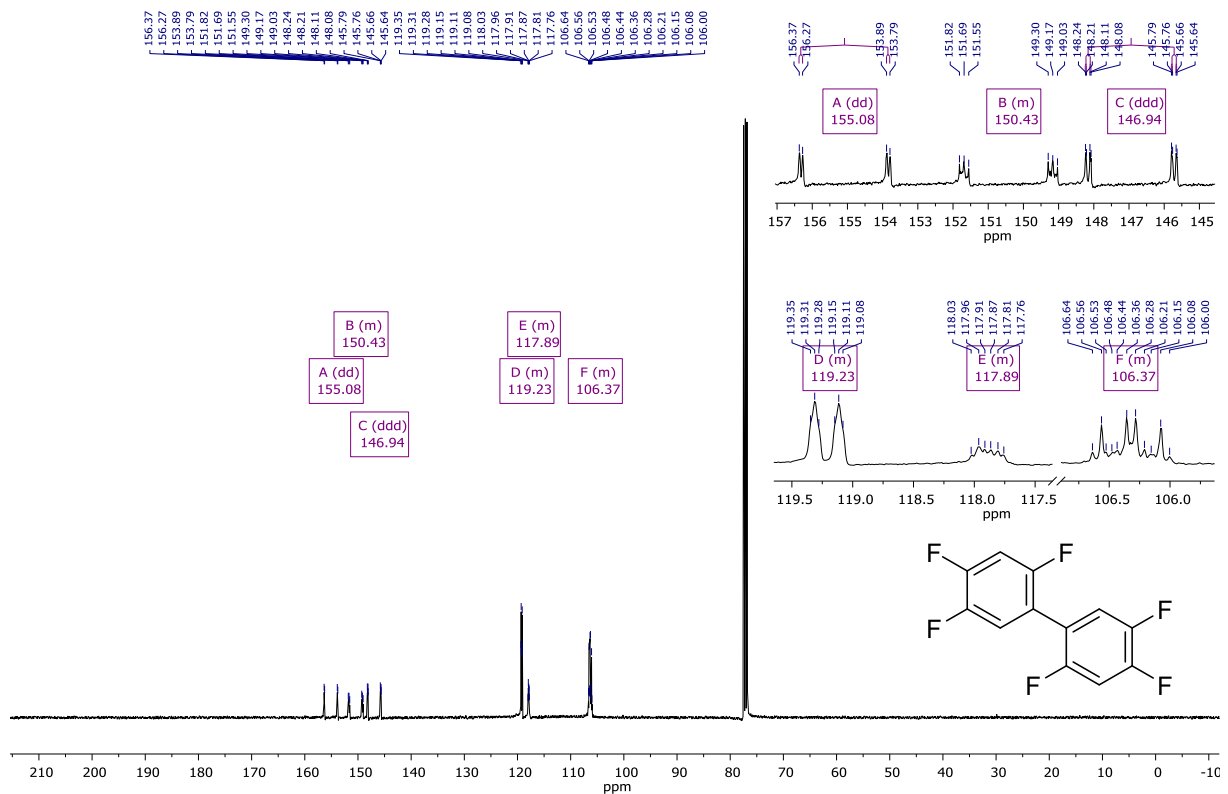Figure S79 <sup>13</sup>C NMR: 2,2',4,4',5,5'-Hexafluoro-1,1'-biphenyl

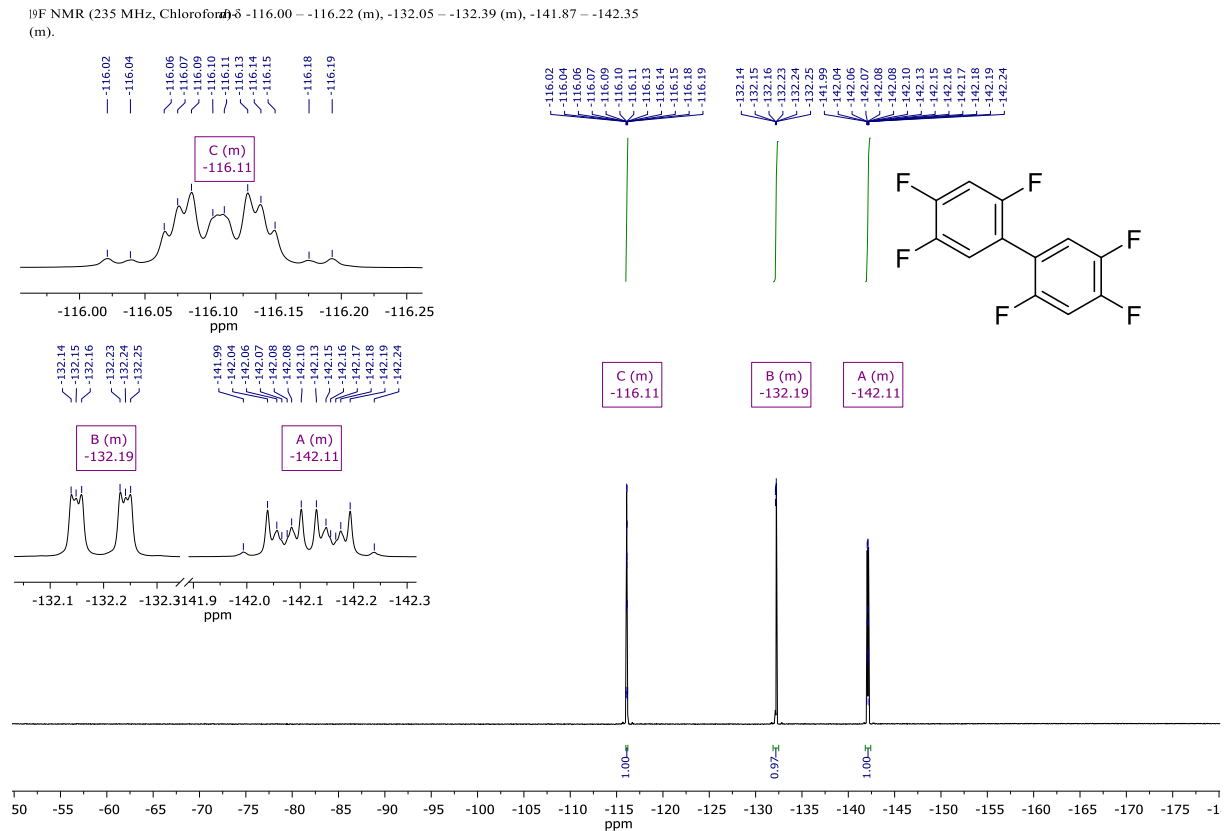Figure S80  $^{19}\text{F}$ -NMR  $\{^1\text{H}\}$ : 2,2',4,4',5,5'-Hexafluoro-1,1'-biphenyl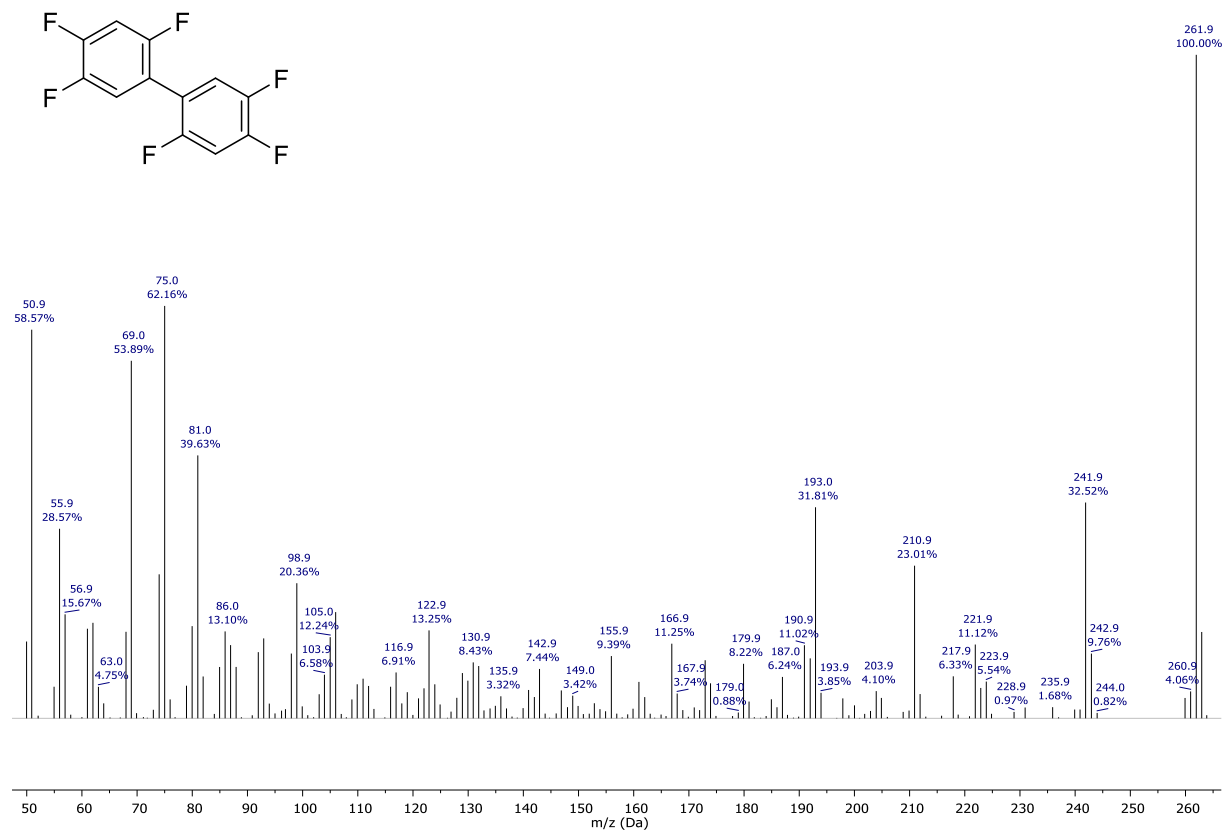Figure S81 EI-Spectrum (EI $^+$ ): 2,2',4,4',5,5'-Hexafluoro-1,1'-biphenyl

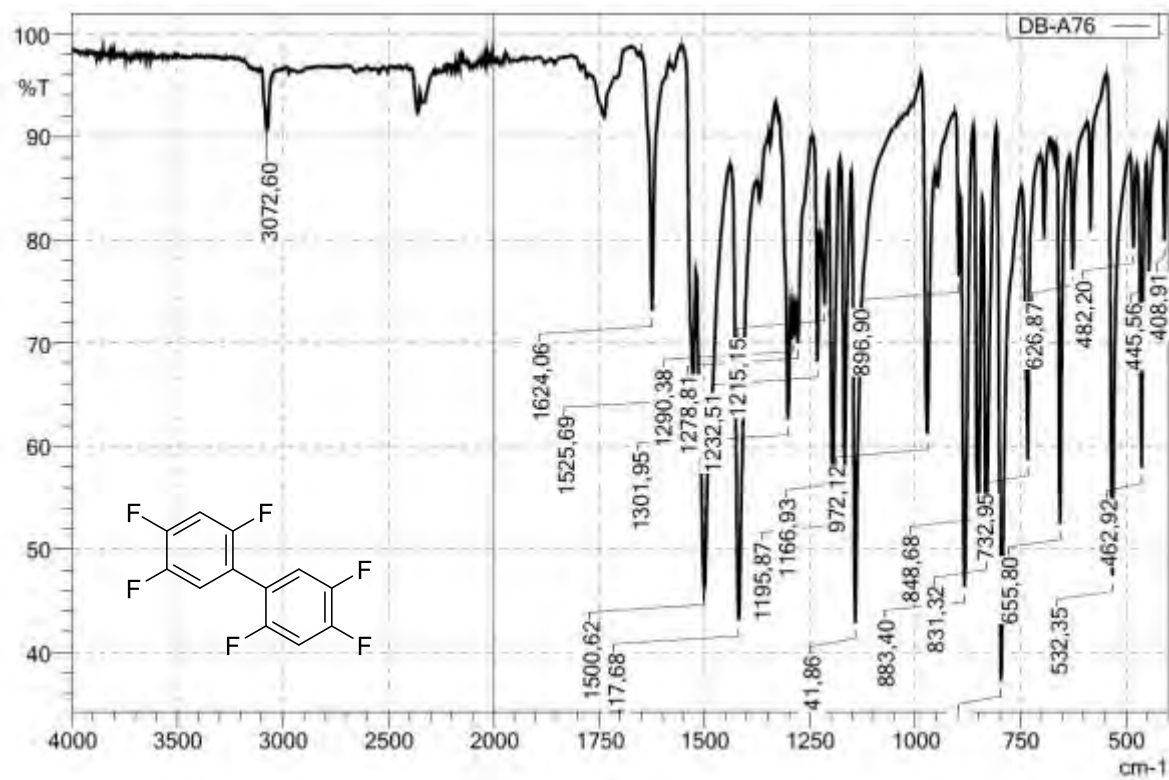

Figure S82 IR (ATR)-Spectrum: 2,2',4,4',5,5'-Hexafluoro-1,1'-biphenyl

## 2,3,3',4,4',5'-Hexafluoro-1,1'-biphenyl (31)

<sup>1</sup>H NMR (250 MHz, Chloroform-d) δ 7.21 – 7.00 (m, 1H).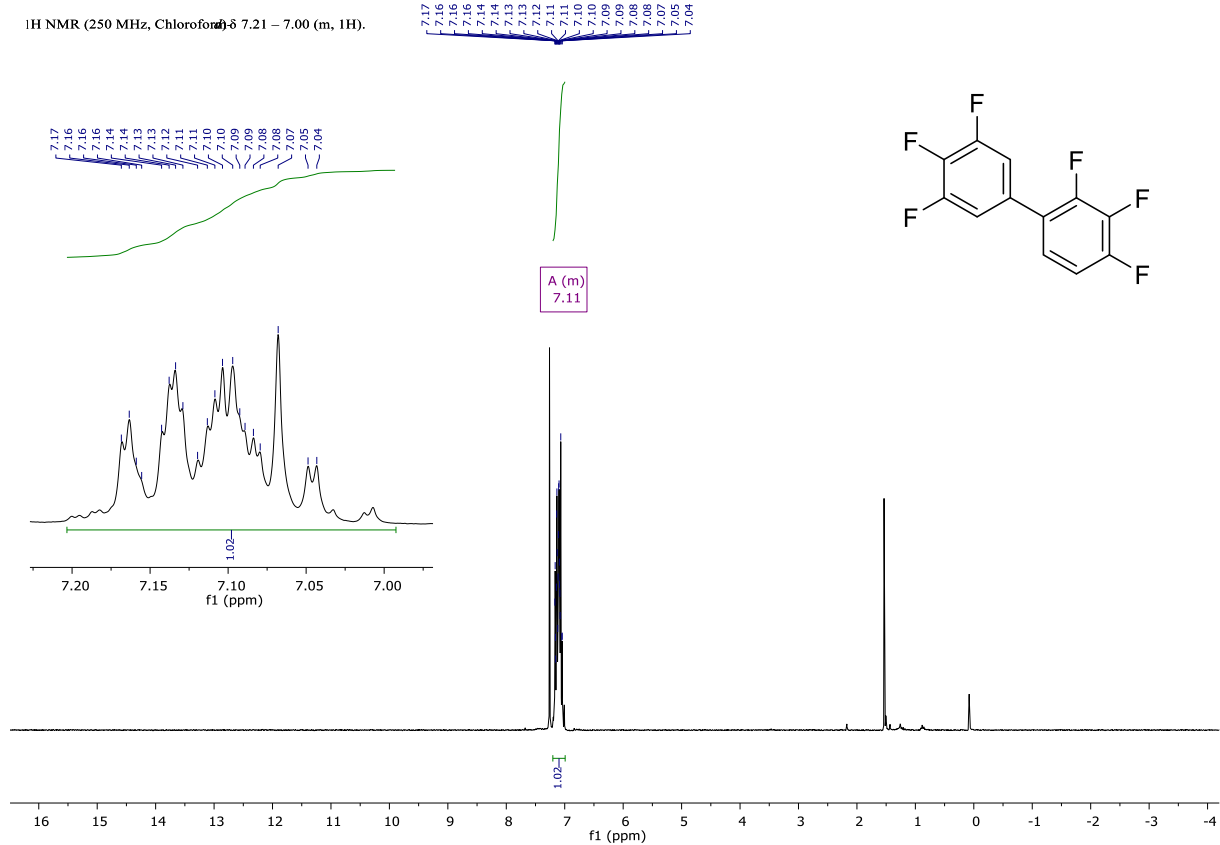Figure S83 <sup>1</sup>H-NMR: 2,3,3',4,4',5'-Hexafluoro-1,1'-biphenyl<sup>19</sup>F NMR (235 MHz, Chloroform-d) δ -133.22 (dd,  $J = 20.4, 8.0$  Hz), -133.59 (t,  $J = 20.6$  Hz), -138.15 (dd,  $J = 20.2, 8.0$  Hz), -158.80 (t,  $J = 20.3$  Hz), -160.30 (t,  $J = 20.6$  Hz).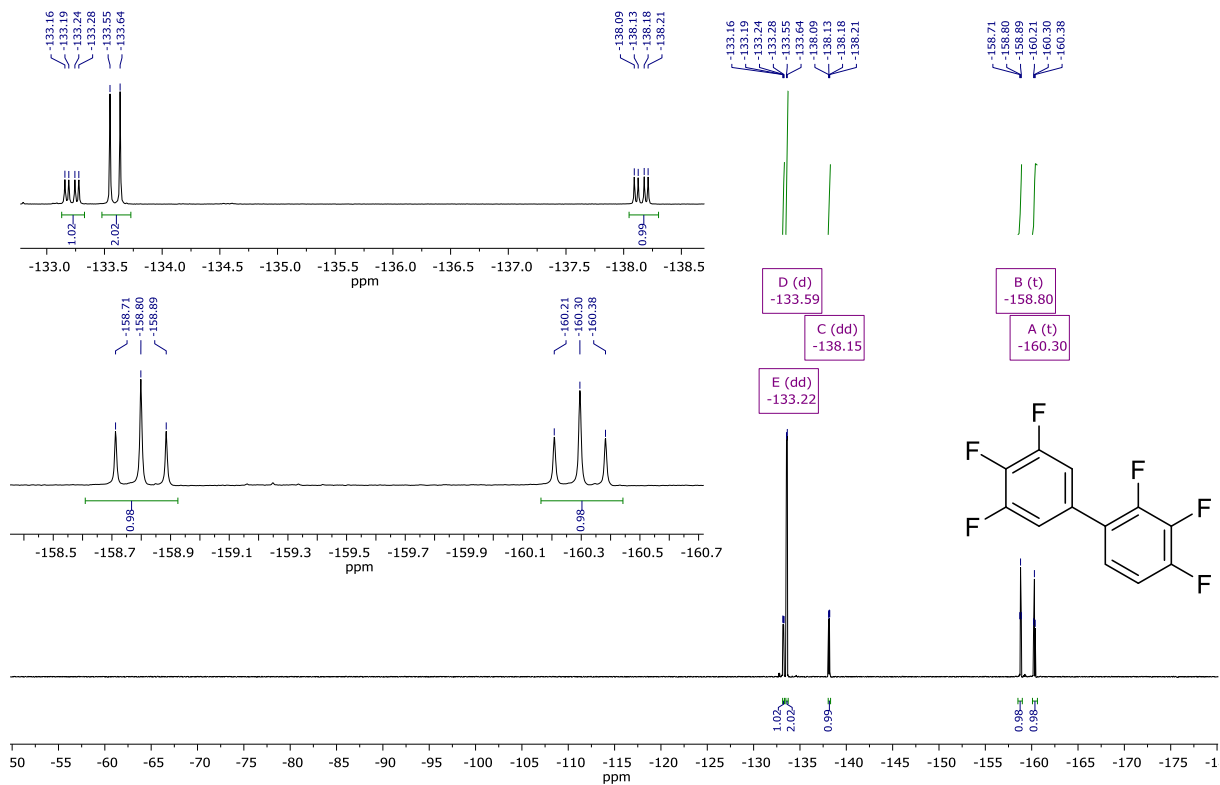Figure S84 <sup>19</sup>F-NMR {<sup>1</sup>H}: 2,3,3',4,4',5'-Hexafluoro-1,1'-biphenyl

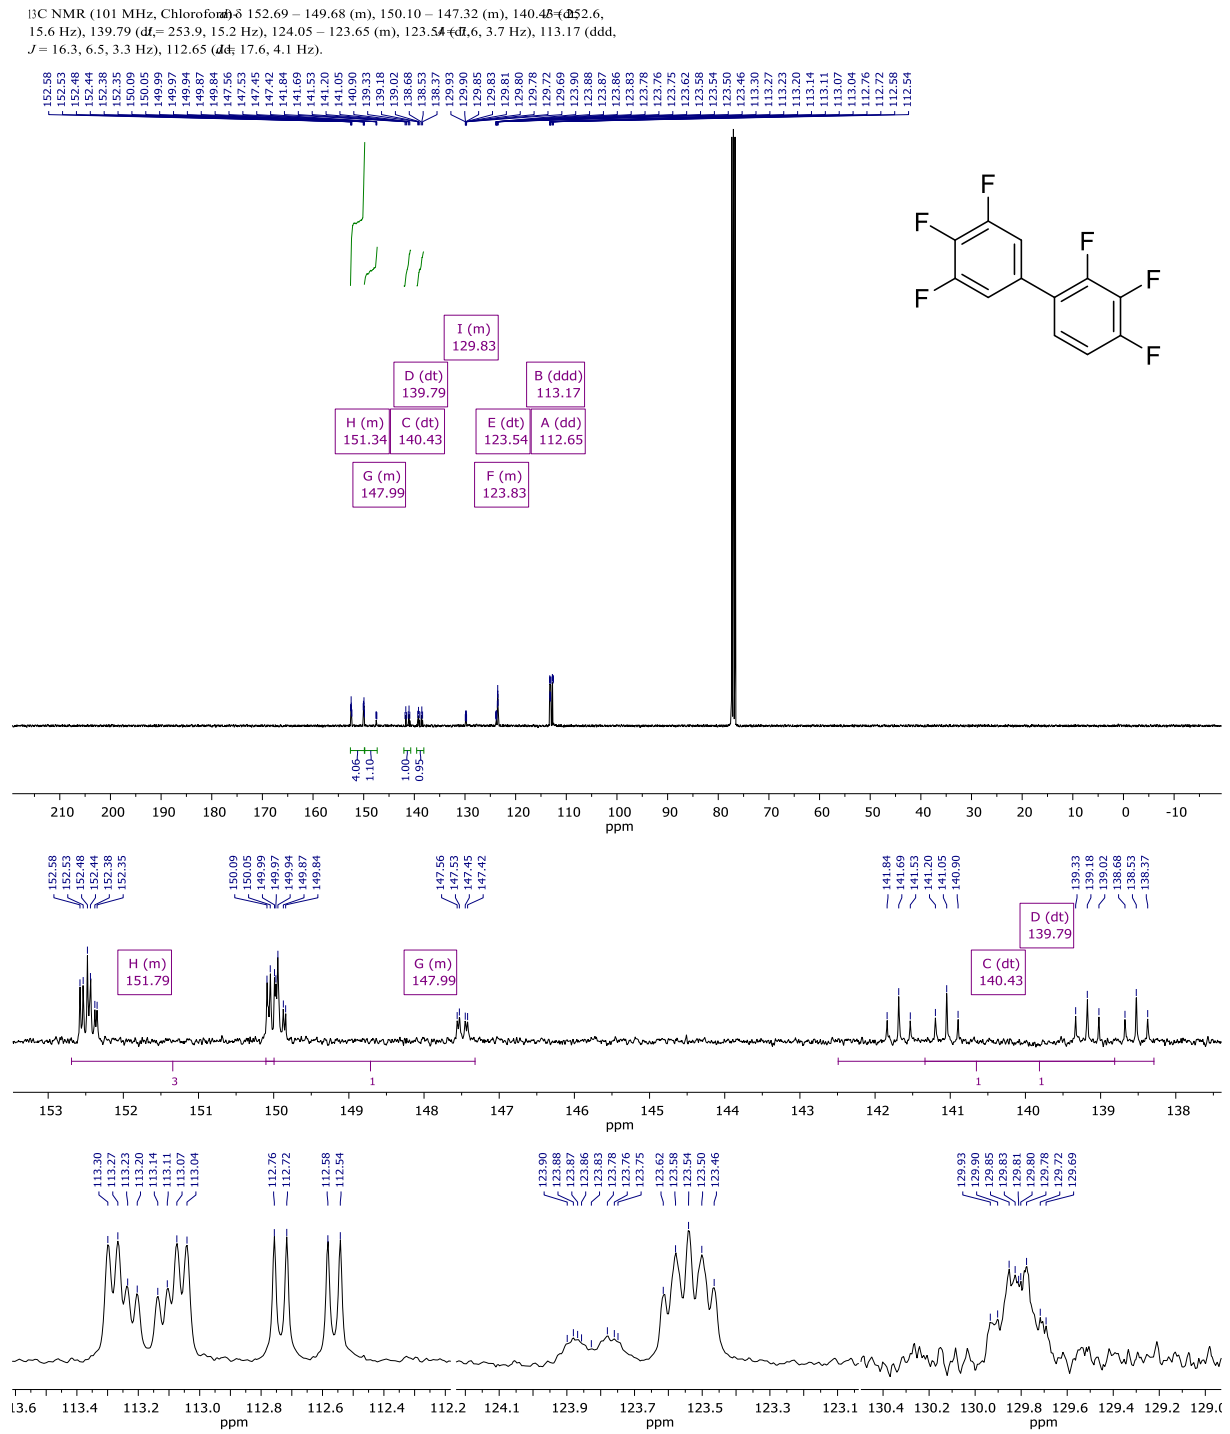Figure S85  $^{13}\text{C}$  NMR: 2,3,3',4,4',5'-Hexafluoro-1,1'-biphenyl

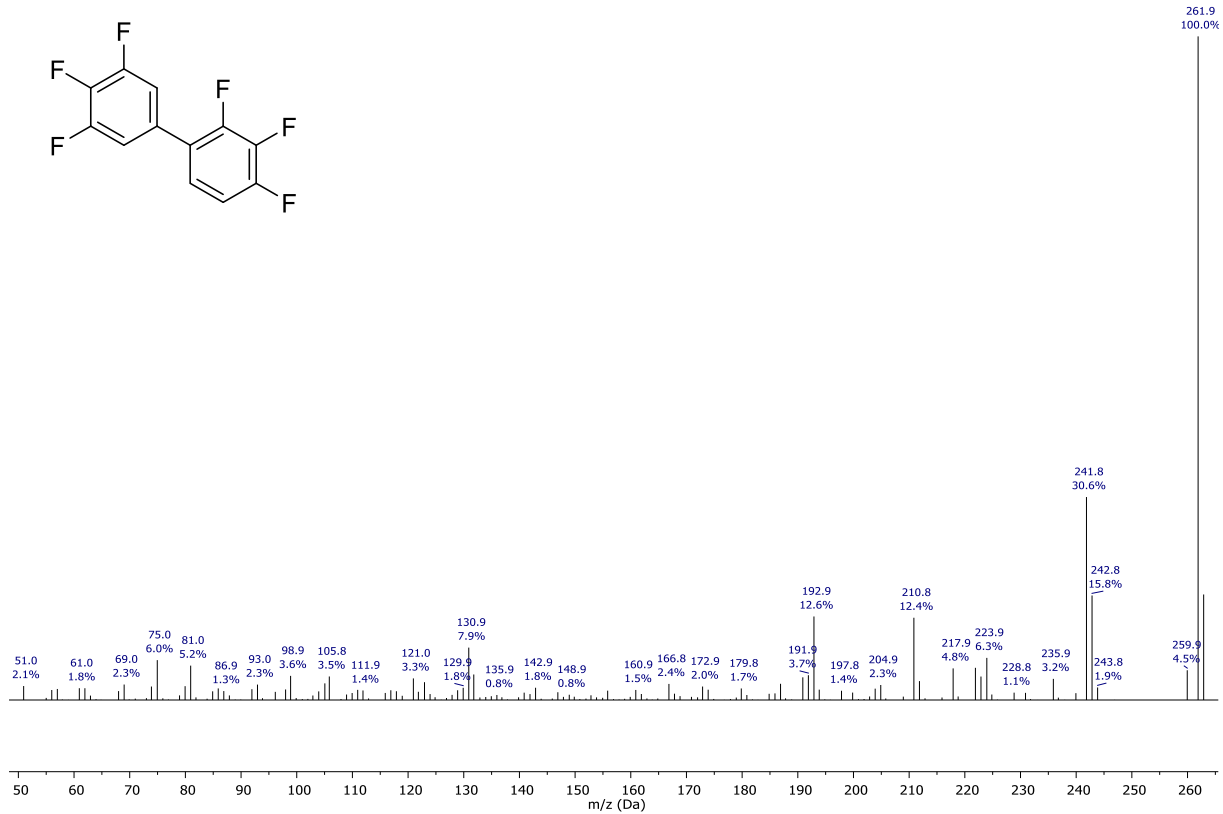Figure S86 EI-Spectrum (EI<sup>+</sup>): 2,3,3',4,4',5'-Hexafluoro-1,1'-biphenyl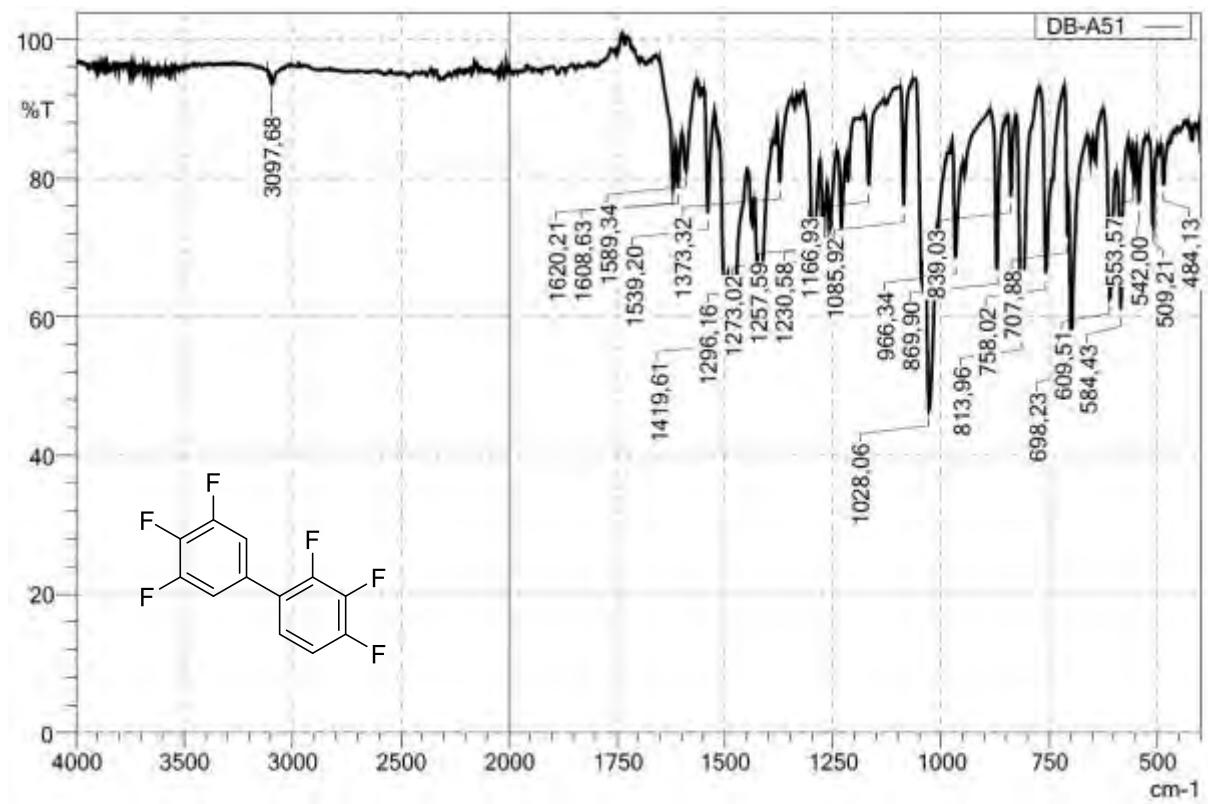

Figure S87 IR (ATR)-Spectrum: 2,3,3',4,4',5'-Hexafluoro-1,1'-biphenyl

## 2,2',3,4,4',5'-Hexafluoro-1,1'-biphenyl (32)

 $^1\text{H NMR}$  (400 MHz, Chloroform- $d_3$ )  $\delta$  7.25 – 7.14 (m, 1H), 7.13 – 7.01 (m, 3H).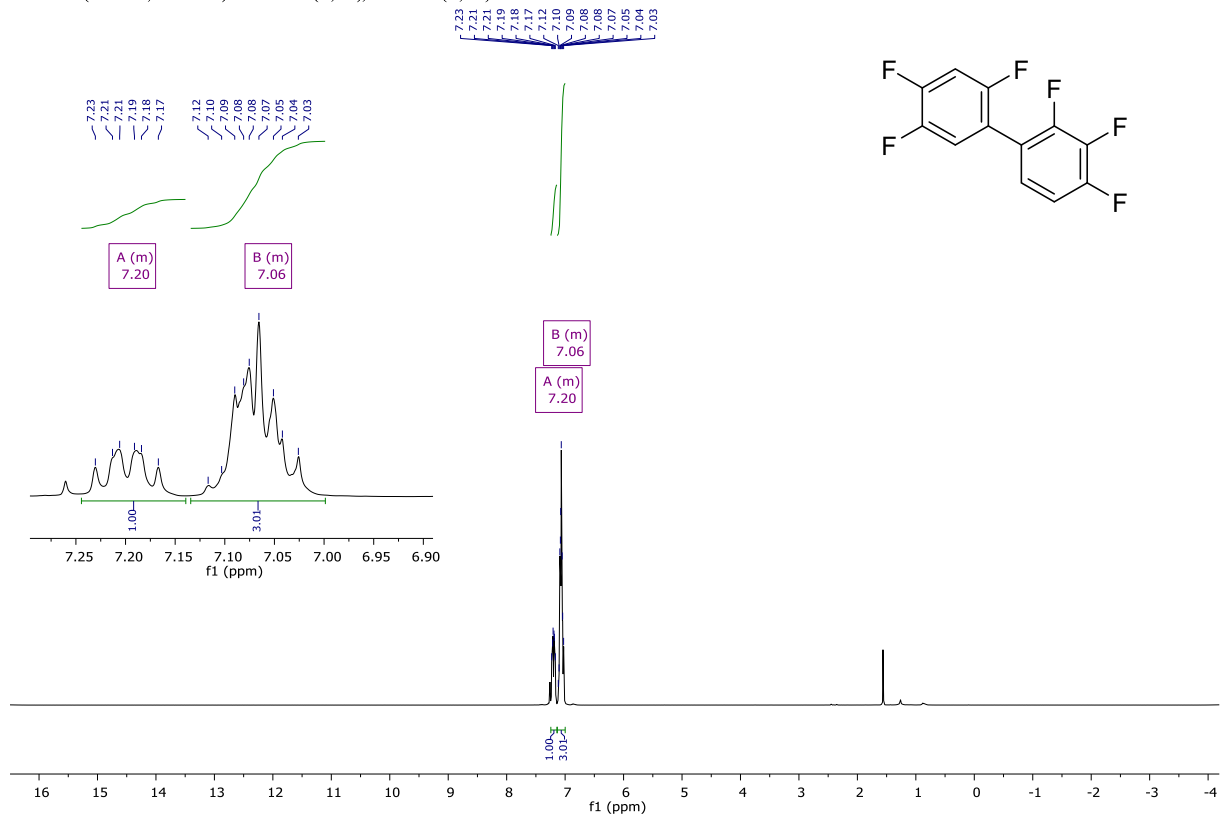Figure S88  $^1\text{H-NMR}$ : 2,2',3,4,4',5'-Hexafluoro-1,1'-biphenyl $^{19}\text{F NMR}$  (235 MHz, Chloroform- $d_3$ )  $\delta$  -115.95 (ddd,  $J$  = 16.3, 14.9, 4.8 Hz), -132.28 (dd, 21.5, 4.8 Hz), -133.21 (dd,  $J$  = 20.5, 8.3 Hz), -134.70 (ddd, 20.4, 16.3, 8.3 Hz), -142.17 (dd, 21.5, 14.9 Hz), -159.40 ( $J$  = 20.4 Hz).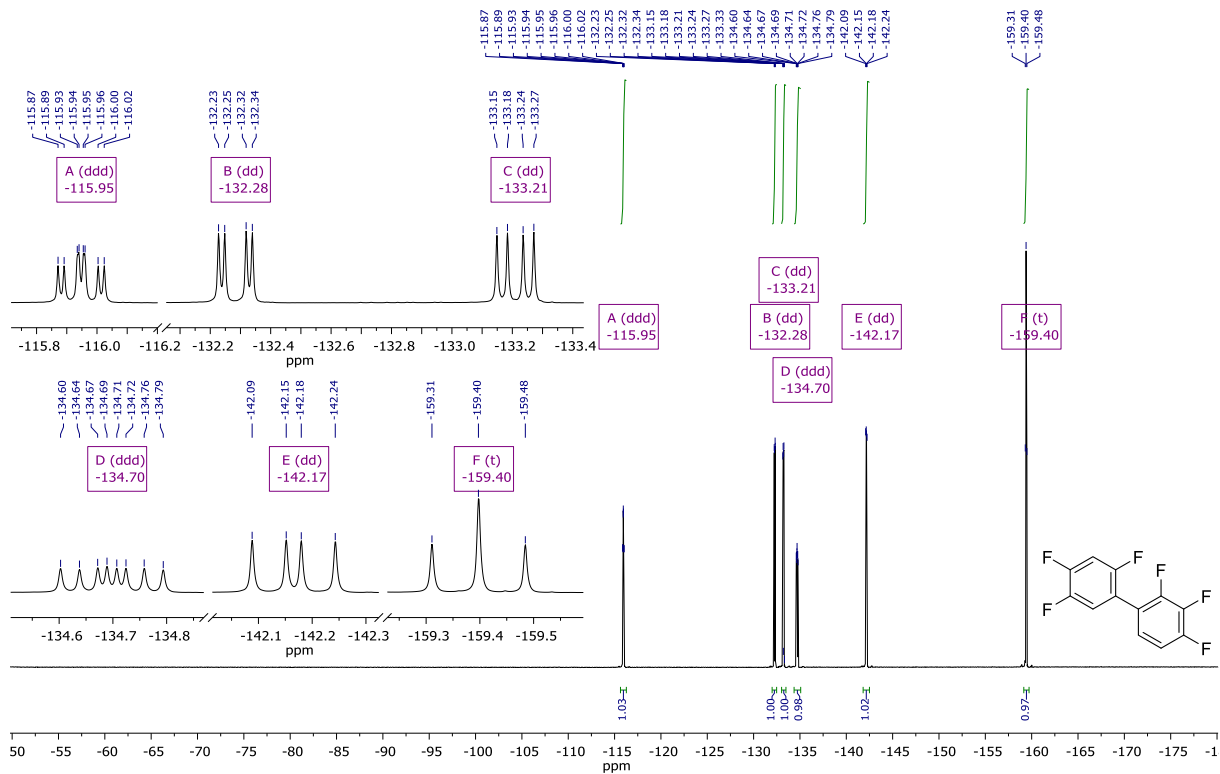Figure S89  $^{19}\text{F-NMR}$   $\{^1\text{H}\}$ : 2,2',3,4,4',5'-Hexafluoro-1,1'-biphenyl





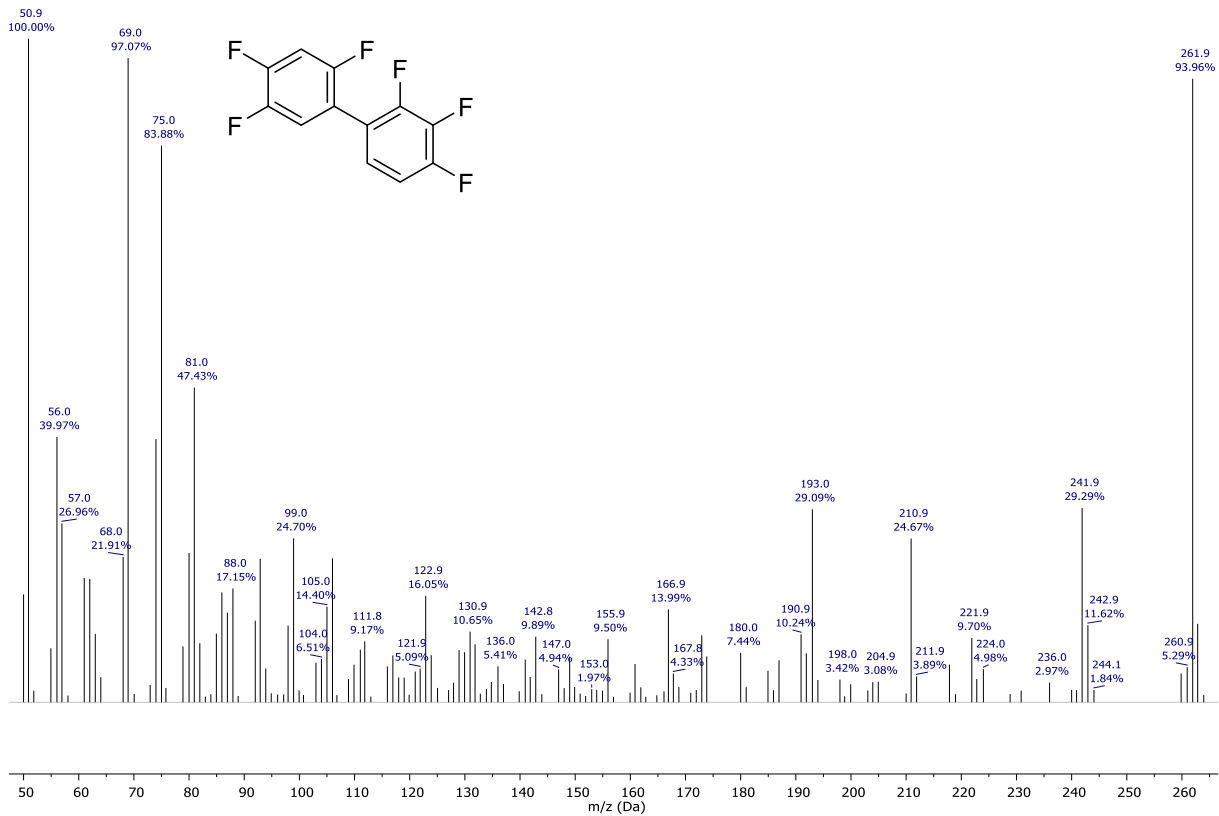Figure S91 EI-Spectrum (EI<sup>+</sup>): 2,2',3,4,4',5'-Hexafluoro-1,1'-biphenyl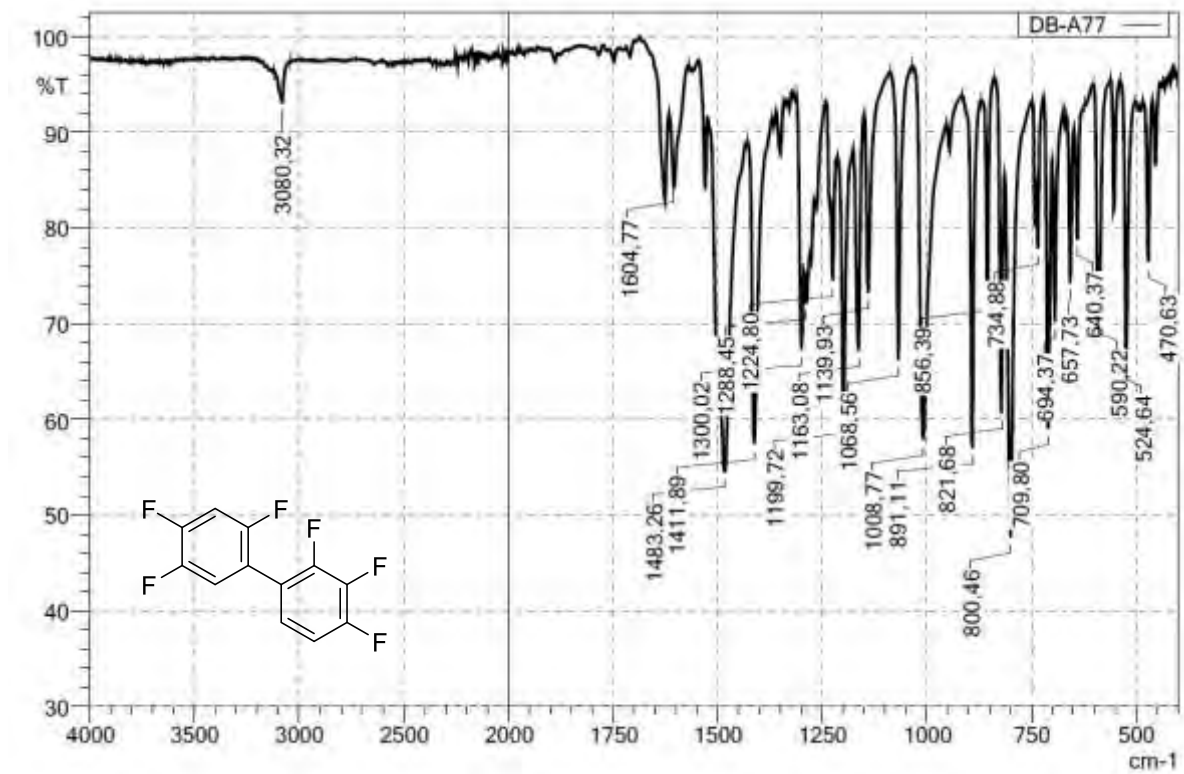

Figure S92 IR (ATR)-Spectrum: 2,2',3,4,4',5'-Hexafluoro-1,1'-biphenyl

## 3,3',4,5,5'-Pentafluoro-4'-(trifluoromethyl)-1,1'-biphenyl (33)

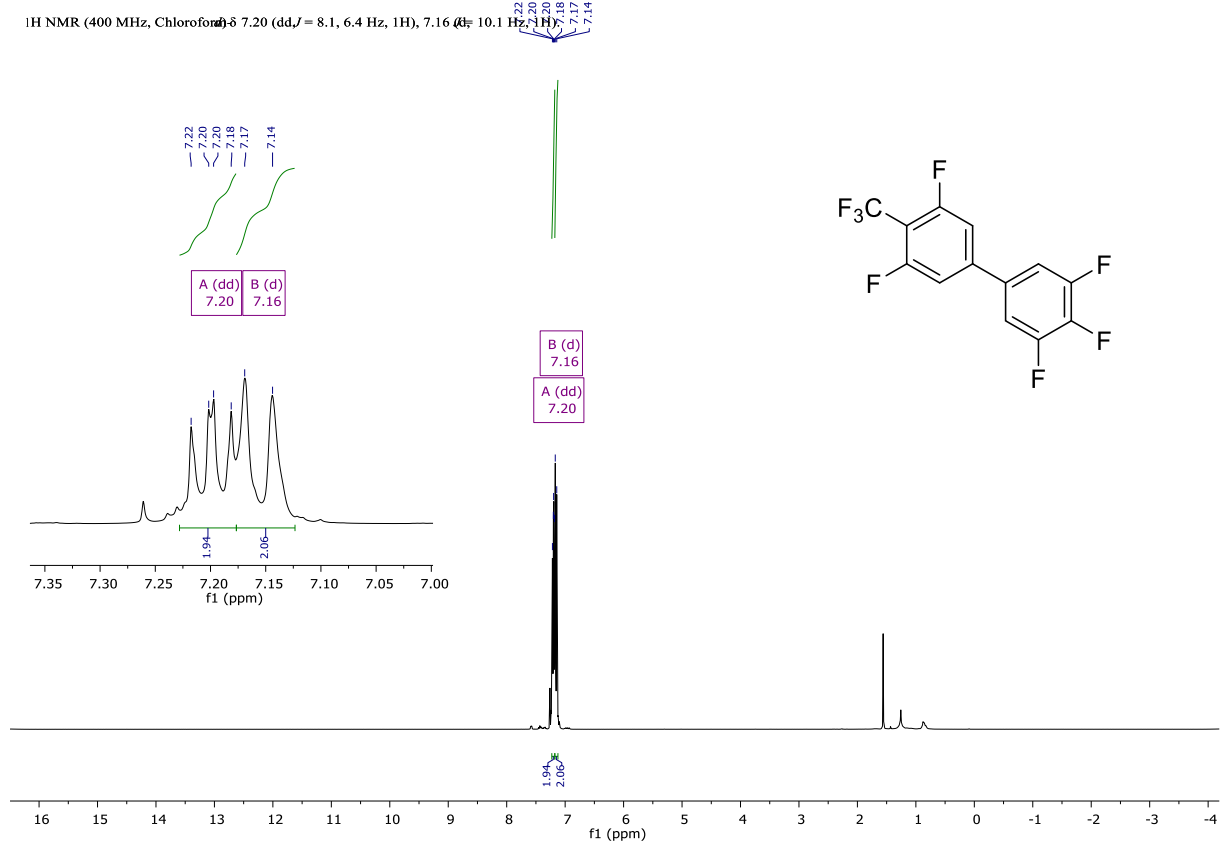Figure S93  $^1\text{H-NMR}$ : 3,3',4,5,5'-Pentafluoro-4'-(trifluoromethyl)-1,1'-biphenyl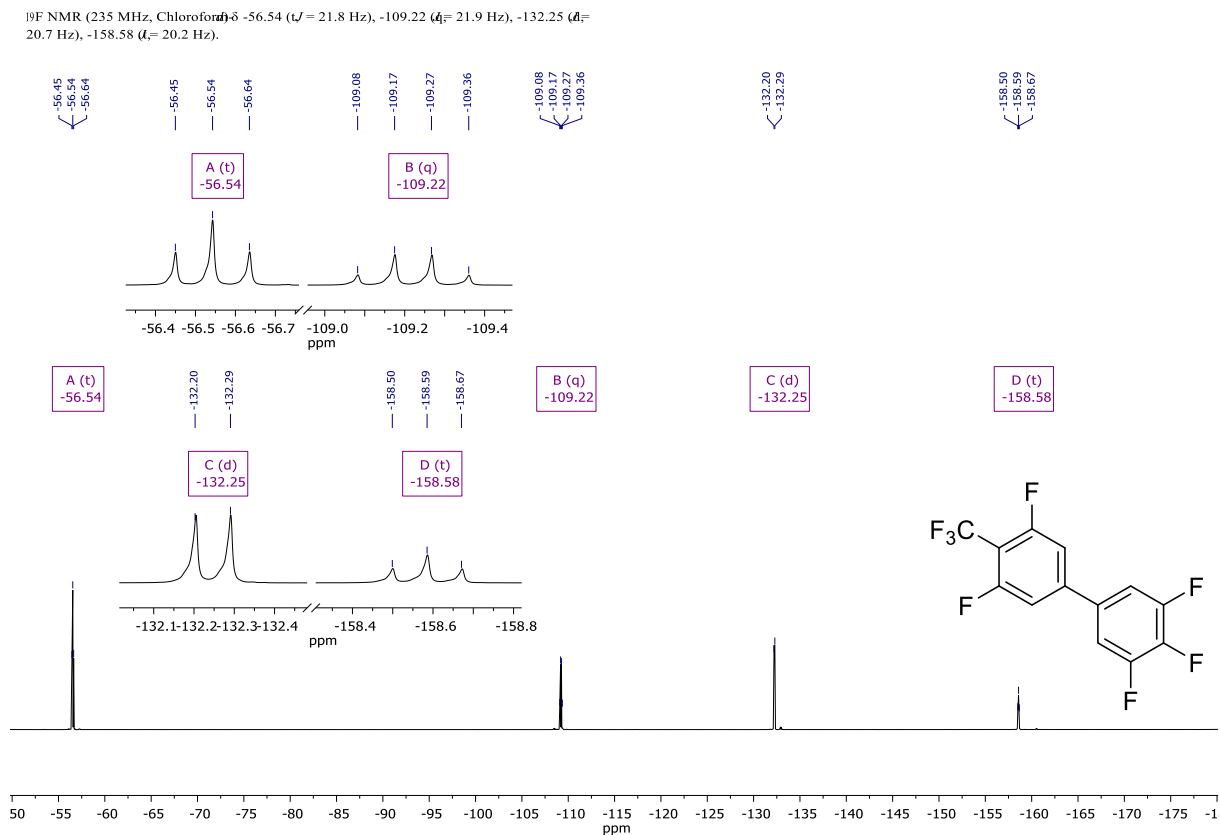Figure S94  $^{19}\text{F-NMR}$   $\{^1\text{H}\}$ : 3,3',4,5,5'-Pentafluoro-4'-(trifluoromethyl)-1,1'-biphenyl

$^{13}\text{C}$  NMR (101 MHz, Chloroform- $d_3$ )  $\delta$  160.52 (dd,  $J = 259.7, 5.8$  Hz), 151.88 (ddd, 252.0, 10.1, 4.2 Hz), 144.51 ( $t = 10.9$  Hz), 140.74 (dt,  $dt = 255.6, 15.3$  Hz), 133.56, 121.65 (q, 274.1 Hz), 111.82 – 111.42 (m), 111.42 – 111.04 (m), 108.40 – 107.03 (m).

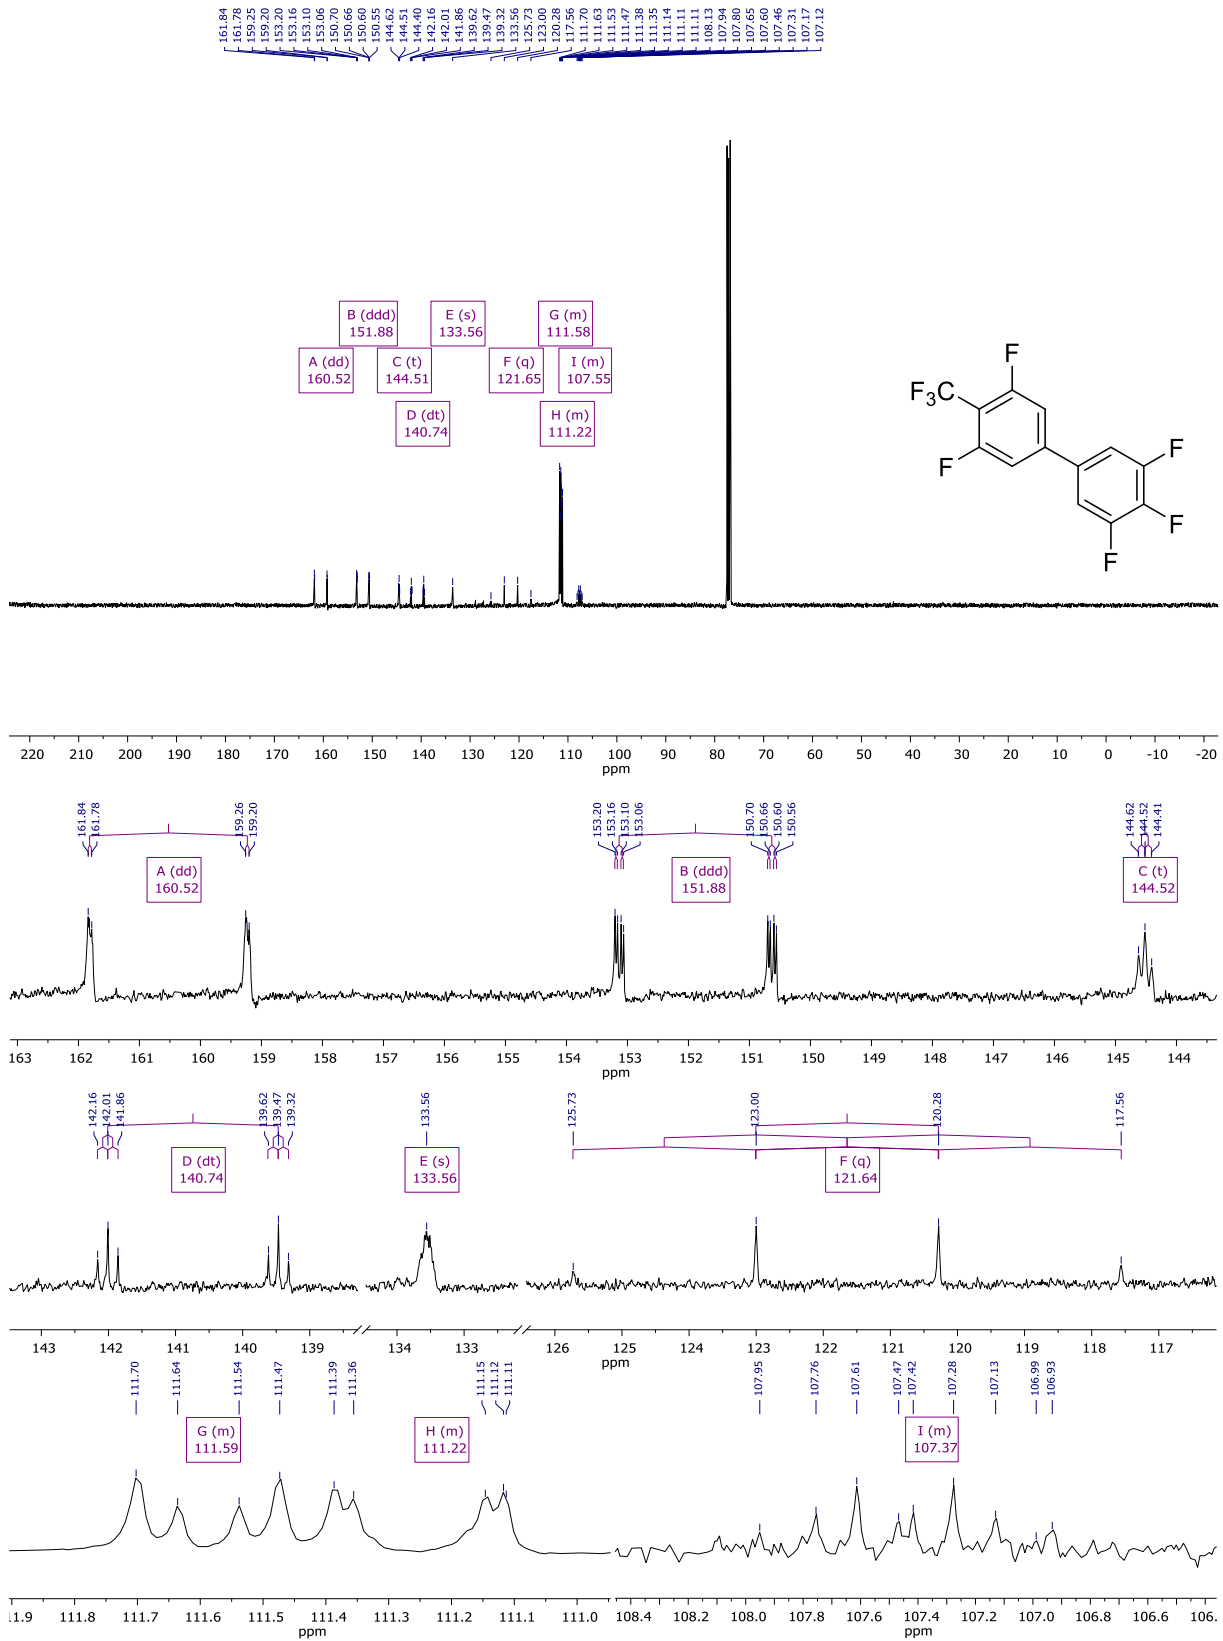

Figure S95  $^{13}\text{C}$  NMR: 3,3',4,5'-Pentafluoro-4'-(trifluoromethyl)-1,1'-biphenyl

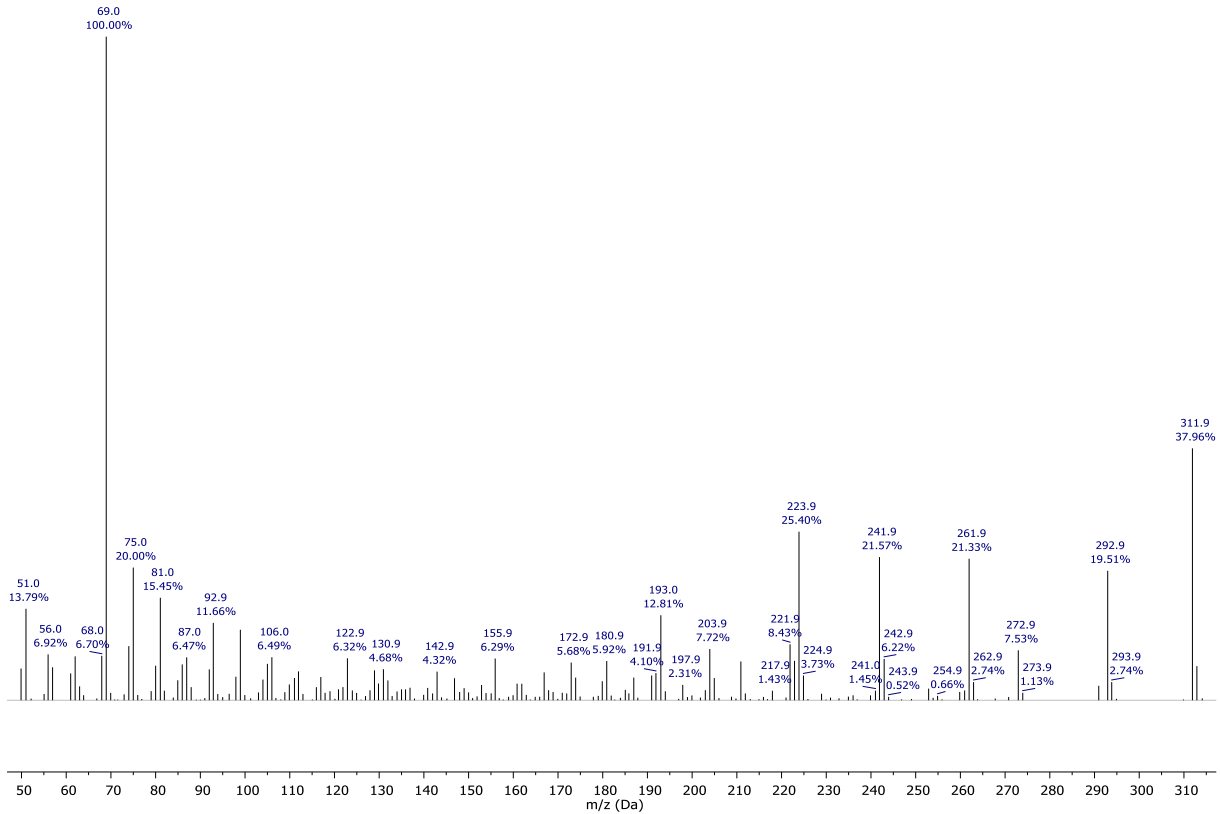

Figure S96 EI-Spectrum (EI<sup>+</sup>): 3,3',4,5,5'-Pentafluoro-4'-(trifluoromethyl)-1,1'-biphenyl

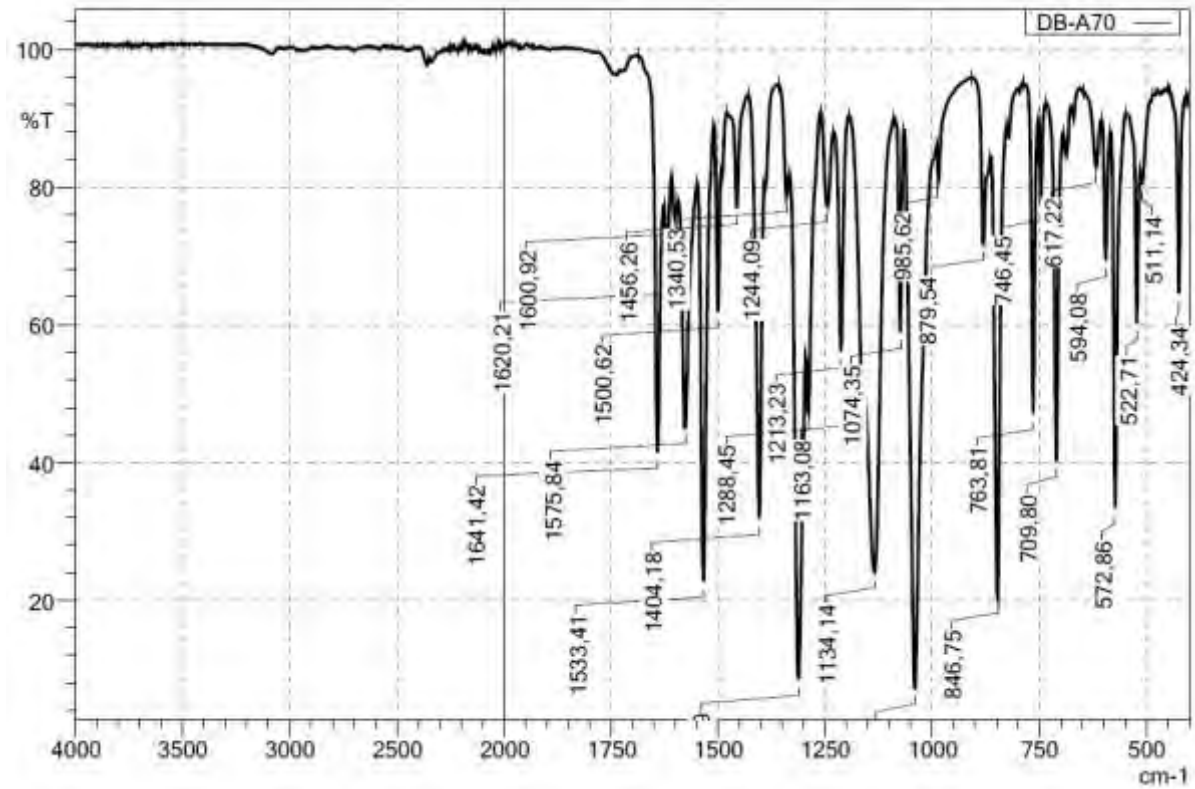

Figure S97 IR (ATR)-Spectrum: 3,3',4,5,5'-Pentafluoro-4'-(trifluoromethyl)-1,1'-biphenyl

## Polyfluorinated Phenylpyridines

## 4-(3,5-Difluorophenyl)-2,3,5-trifluoropyridine (34)

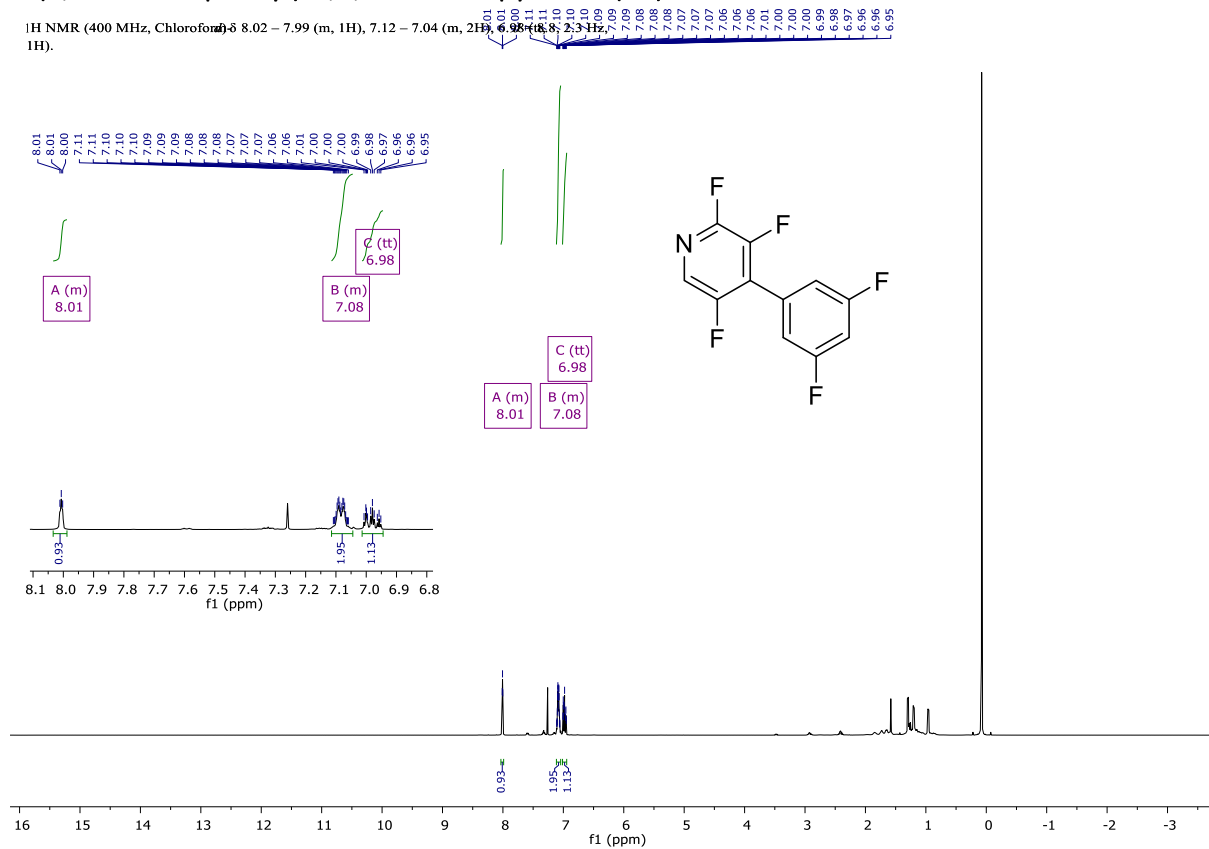Figure S98 <sup>1</sup>H-NMR: 4-(3,5-Difluorophenyl)-2,3,5-trifluoropyridine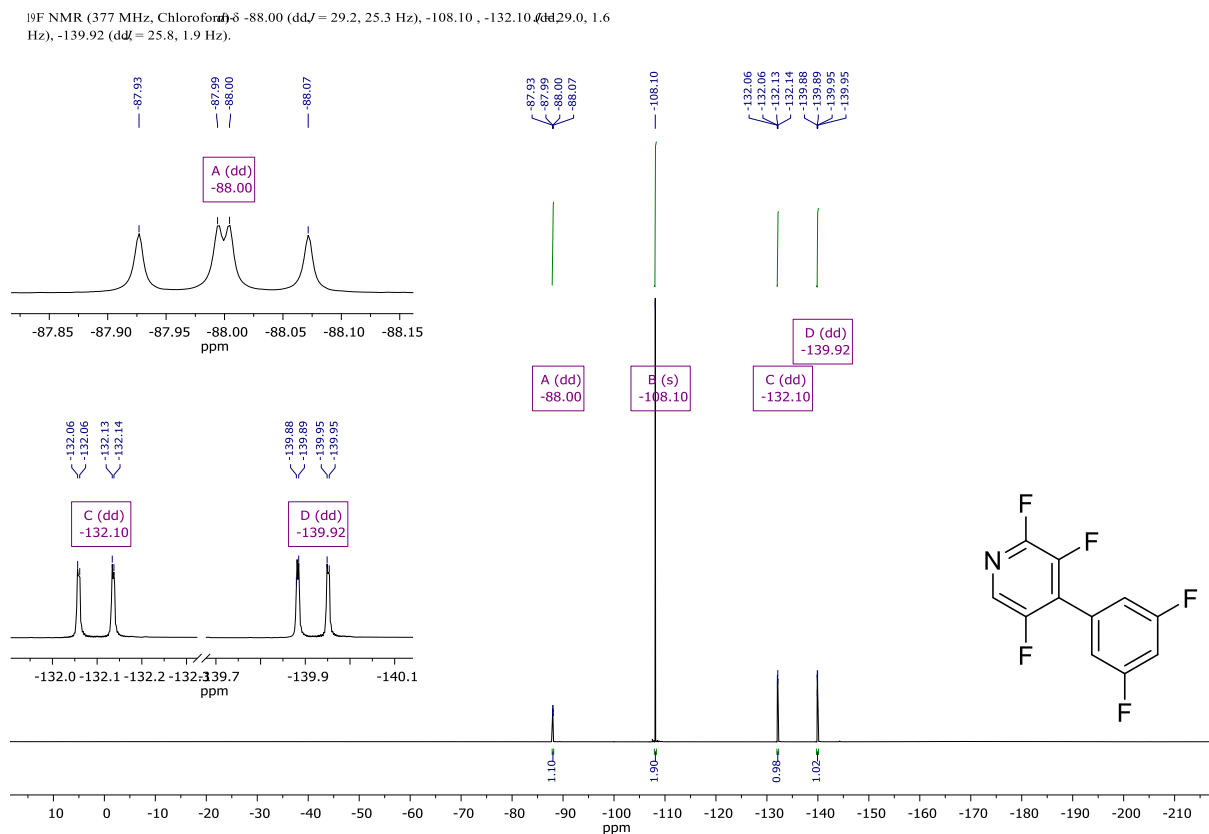Figure S99 <sup>19</sup>F-NMR {<sup>1</sup>H}: 4-(3,5-Difluorophenyl)-2,3,5-trifluoropyridine

$^{13}\text{C}$  NMR (101 MHz, Chloroform- $d_3$ )  $\delta$  161.93 (dd/ $J$  = 250.2, 12.8 Hz), 152.46 (dd; 257.5, 4.3 Hz), 147.77 (ddd/ $J$  = 237.2, 15.2, 2.2 Hz), 145.75 (d, 162.1 Hz), 140.97 (ddd = 267.0, 31.7, 2.8 Hz), 128.26 – 127.84 (m), 127.84 – 127.59 (m), 112.67 – 111.70 (m), 104.73 (t).

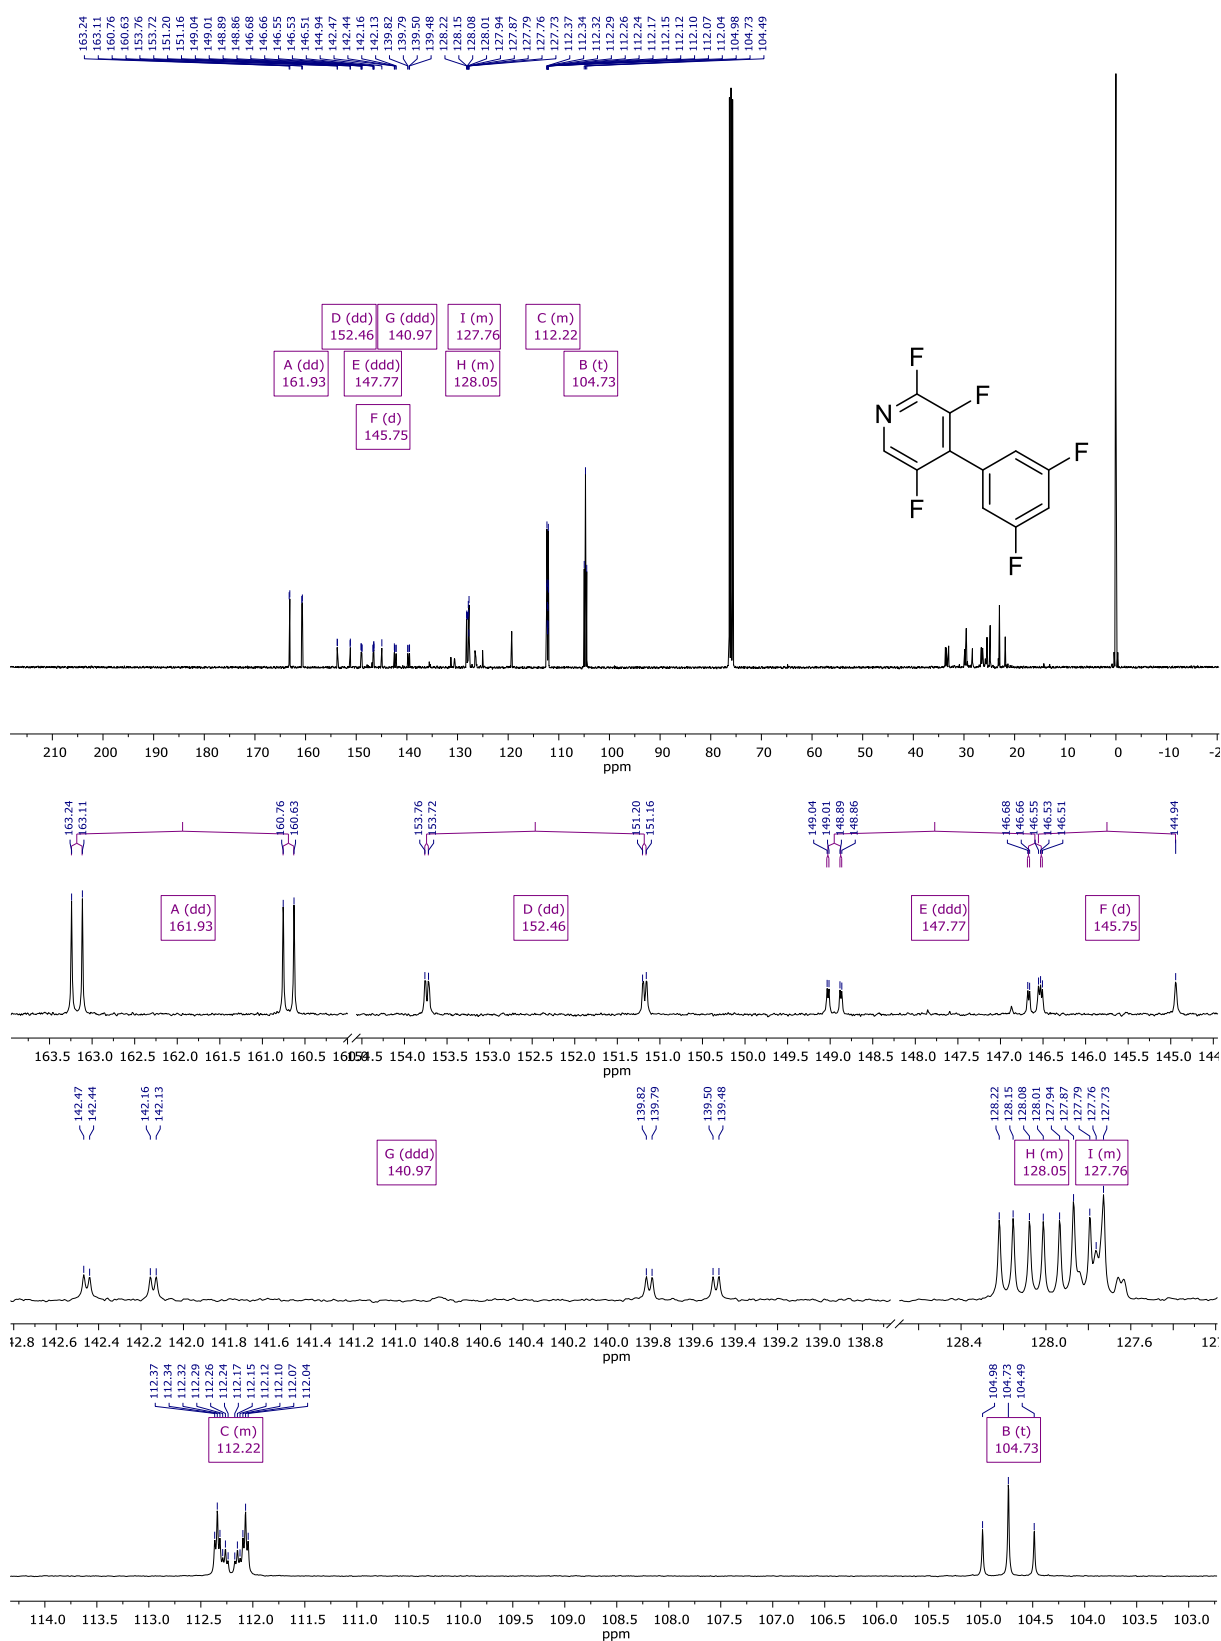

Figure S100  $^{13}\text{C}$  NMR: 4-(3,5-Difluorophenyl)-2,3,5-trifluoropyridine

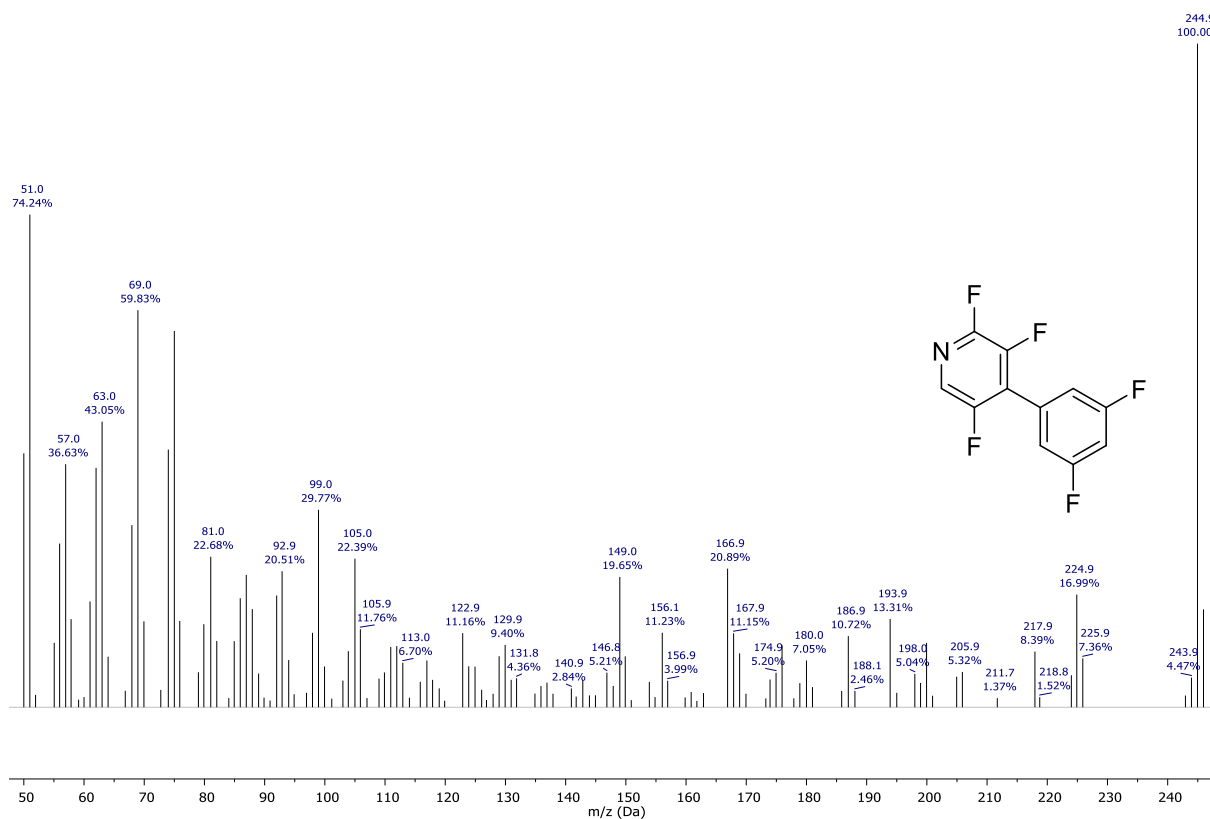Figure S101 EI-Spectrum (EI<sup>+</sup>): 4-(3,5-Difluorophenyl)-2,3,5-trifluoropyridine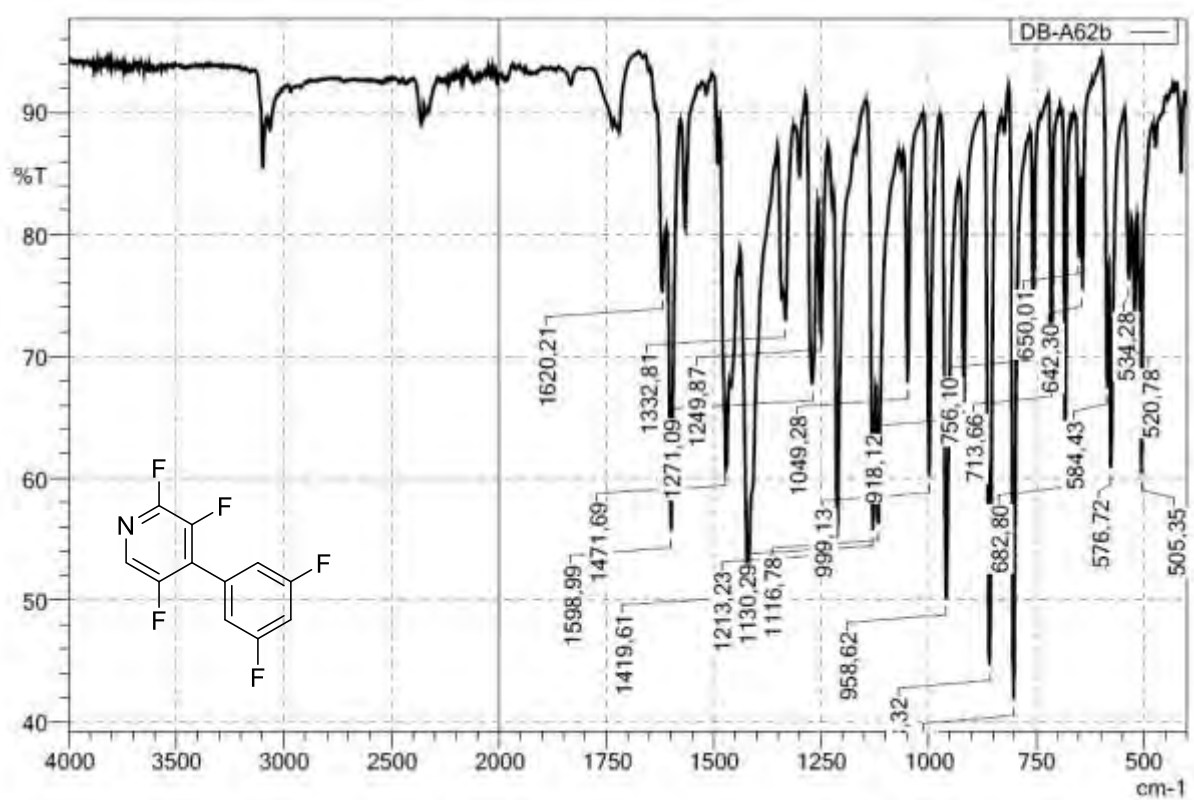

Figure S102 IR (ATR)-Spectrum: 4-(3,5-Difluorophenyl)-2,3,5-trifluoropyridine

## 2,3,5-Trifluoro-4-(3,4,5-trifluorophenyl)pyridine (35)

<sup>1</sup>H NMR (400 MHz, Chloroform-d)  $\delta$  7.94 (t,  $J = 1.8$  Hz, 1H), 7.18 – 7.10 (m, 2H).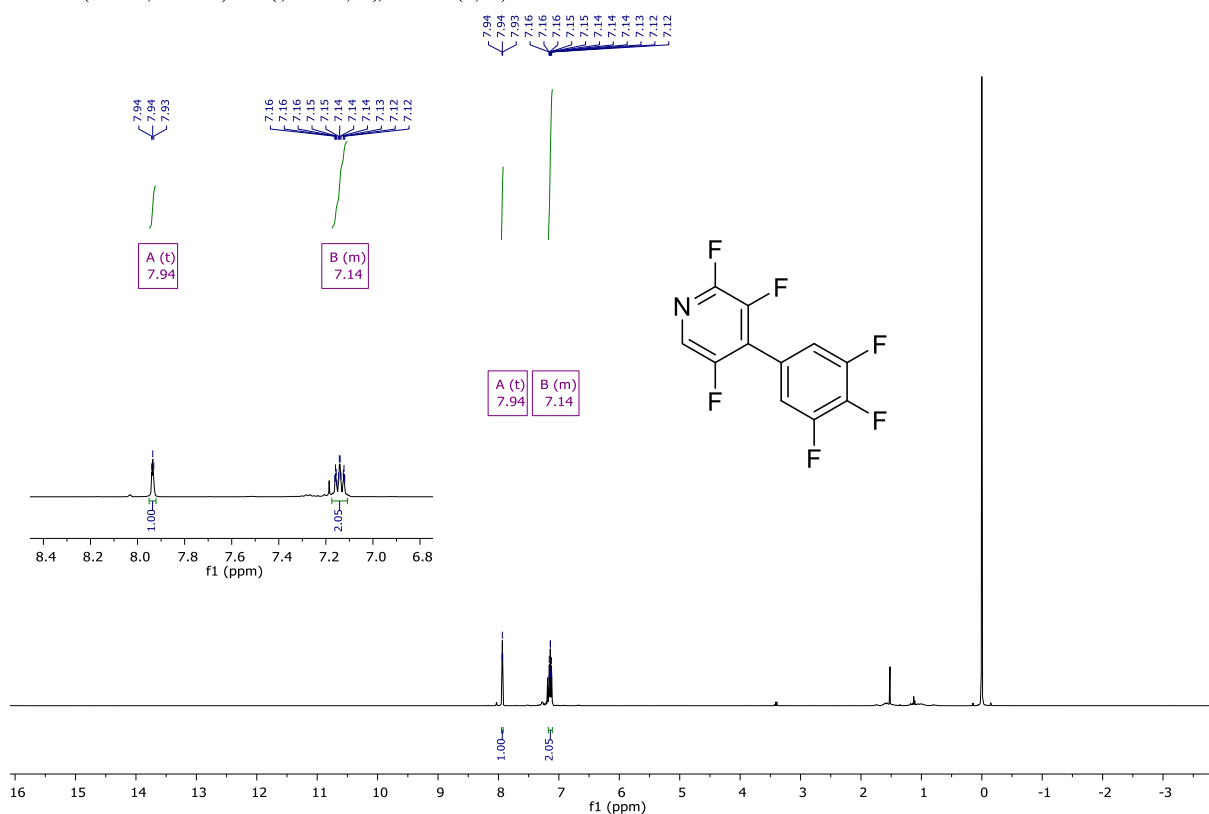Figure S103 <sup>1</sup>H-NMR: 2,3,5-Trifluoro-4-(3,4,5-trifluorophenyl)pyridine<sup>19</sup>F NMR (377 MHz, Chloroform-d)  $\delta$  -87.68 (dd,  $J = 29.3, 25.5$  Hz), -132.35 (dd,  $J = 29.0, 1.4$  Hz), -132.47 (d,  $J = 20.5$  Hz), -140.16 (d,  $J = 25.1$  Hz), -156.38 (t,  $J = 20.4$  Hz).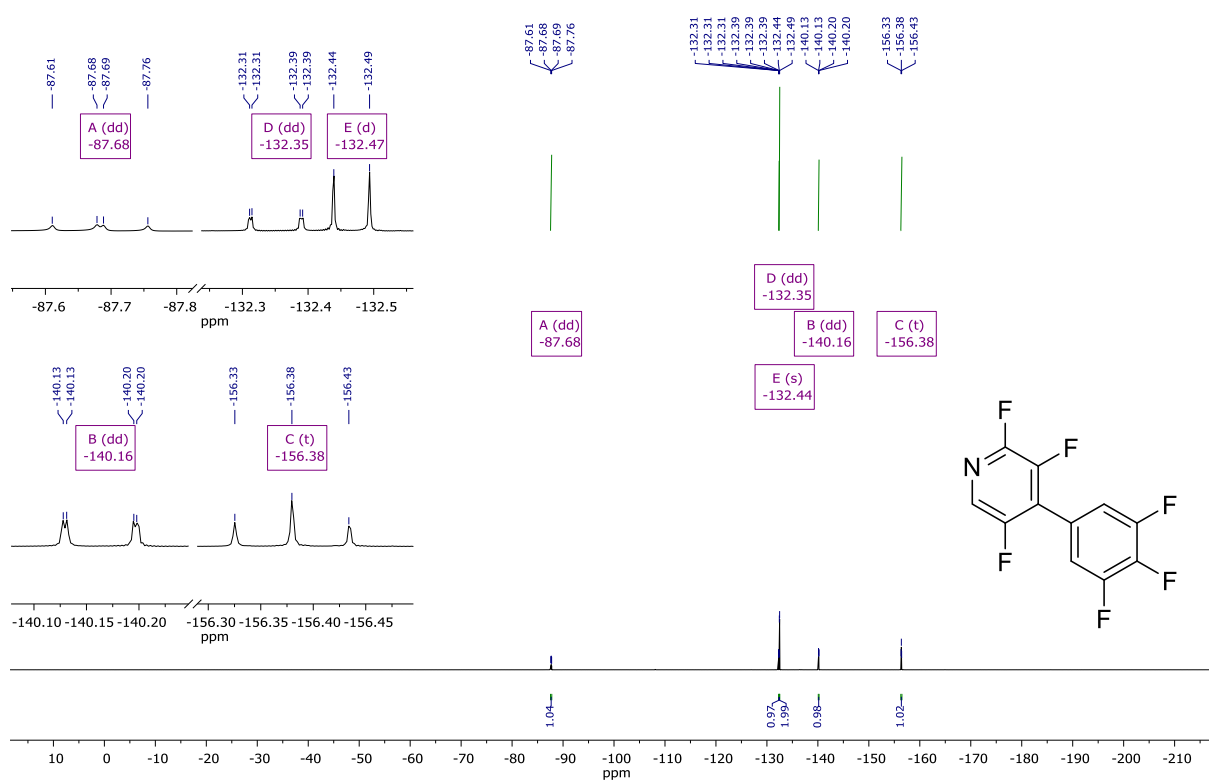Figure S104 <sup>19</sup>F-NMR {<sup>1</sup>H}: 2,3,5-Trifluoro-4-(3,4,5-trifluorophenyl)pyridine





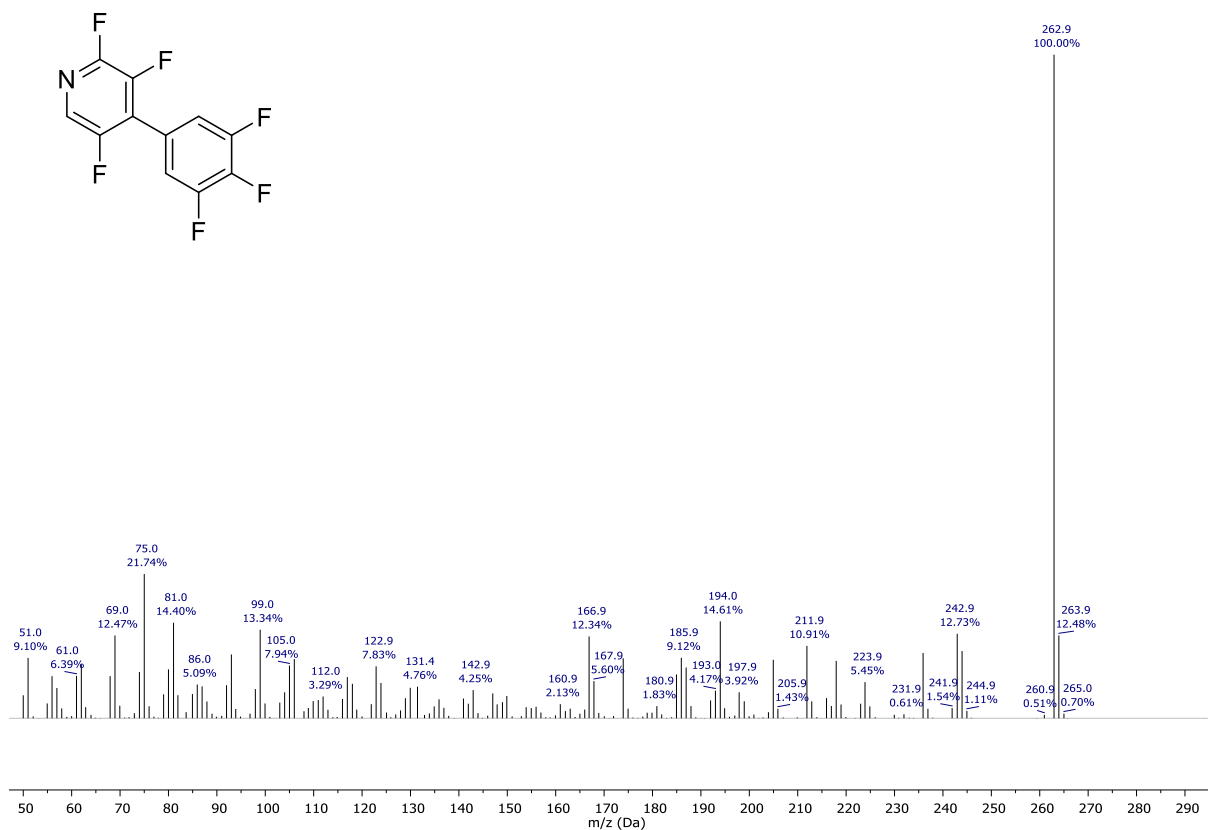Figure S106 EI-Spectrum (EI<sup>+</sup>): 2,3,5-Trifluoro-4-(3,4,5-trifluorophenyl)pyridine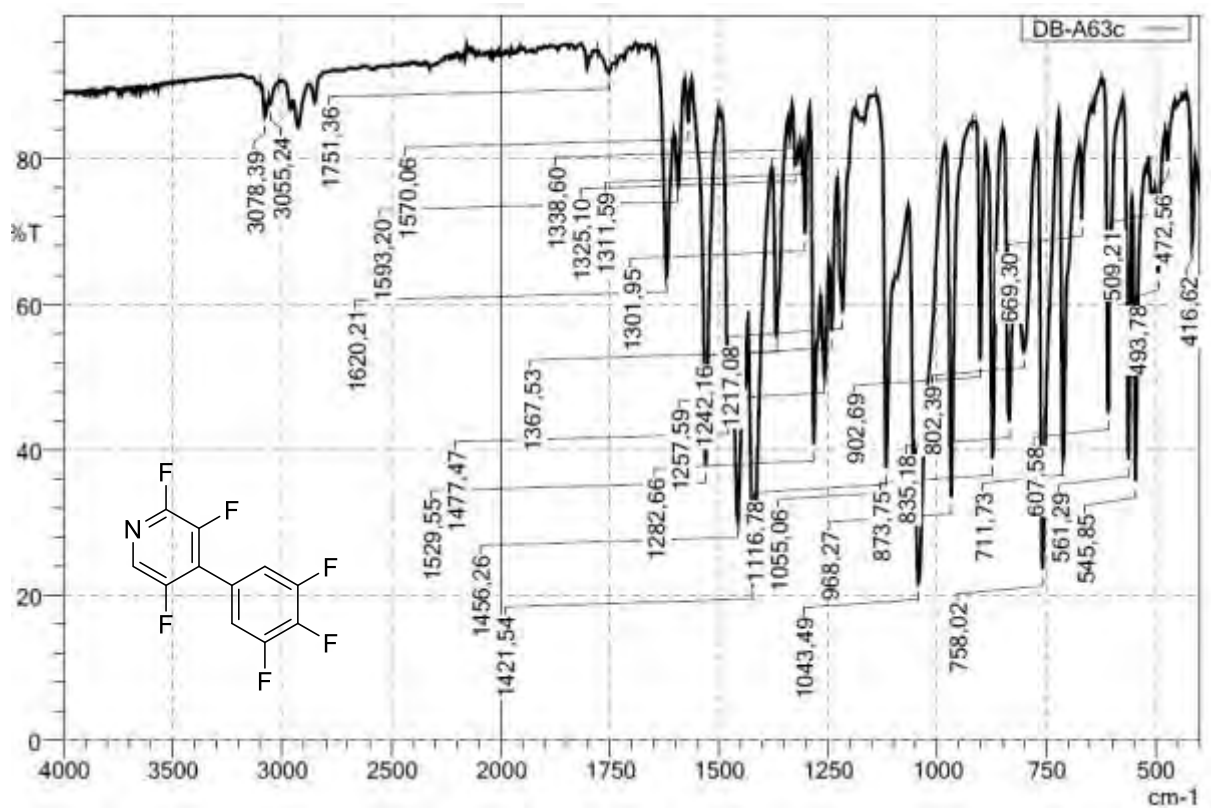

Figure S107 IR (ATR)-Spectrum: 2,3,5-Trifluoro-4-(3,4,5-trifluorophenyl)pyridine

## 2,3,5-Trifluoro-4-(2,3,4-trifluorophenyl)pyridine (36)

 $^1\text{H NMR}$  (400 MHz, Chloroform- $d_3$ )  $\delta$  8.01 (dd,  $J = 2.2, 1.3$  Hz, 1H), 7.21 – 7.09 (m, 2H).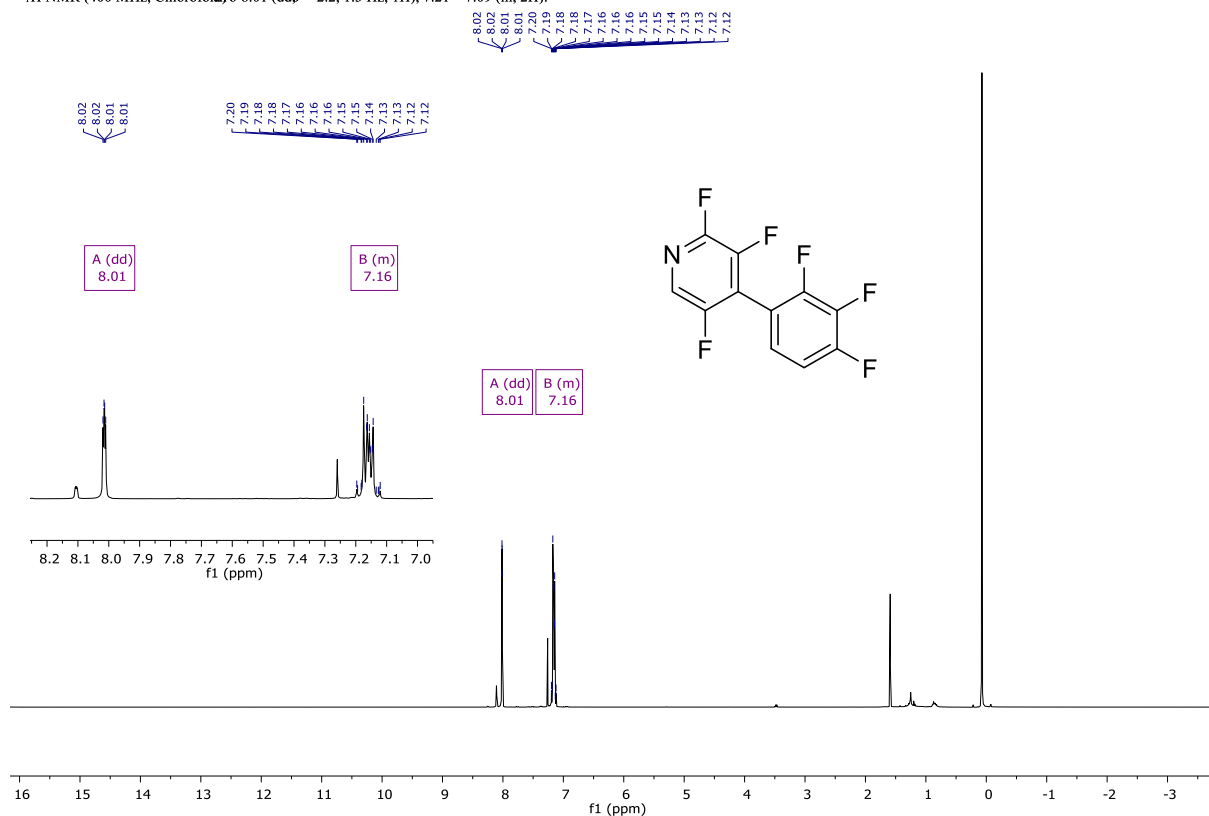Figure S108  $^1\text{H-NMR}$ : 2,3,5-Trifluoro-4-(2,3,4-trifluorophenyl)pyridine $^{19}\text{F NMR}$  (377 MHz, Chloroform- $d_3$ )  $\delta$  -88.08 (dd,  $J = 29.1, 25.3$  Hz), -129.78 (dd,  $J = 20.5, 10.0$  Hz), -129.95 (dd,  $J = 29.2, 12.2$  Hz), -130.95 – -131.42 (m), -136.97 (dd,  $J = 5.2, 12.2$  Hz), -158.20 (t, 20.4 Hz).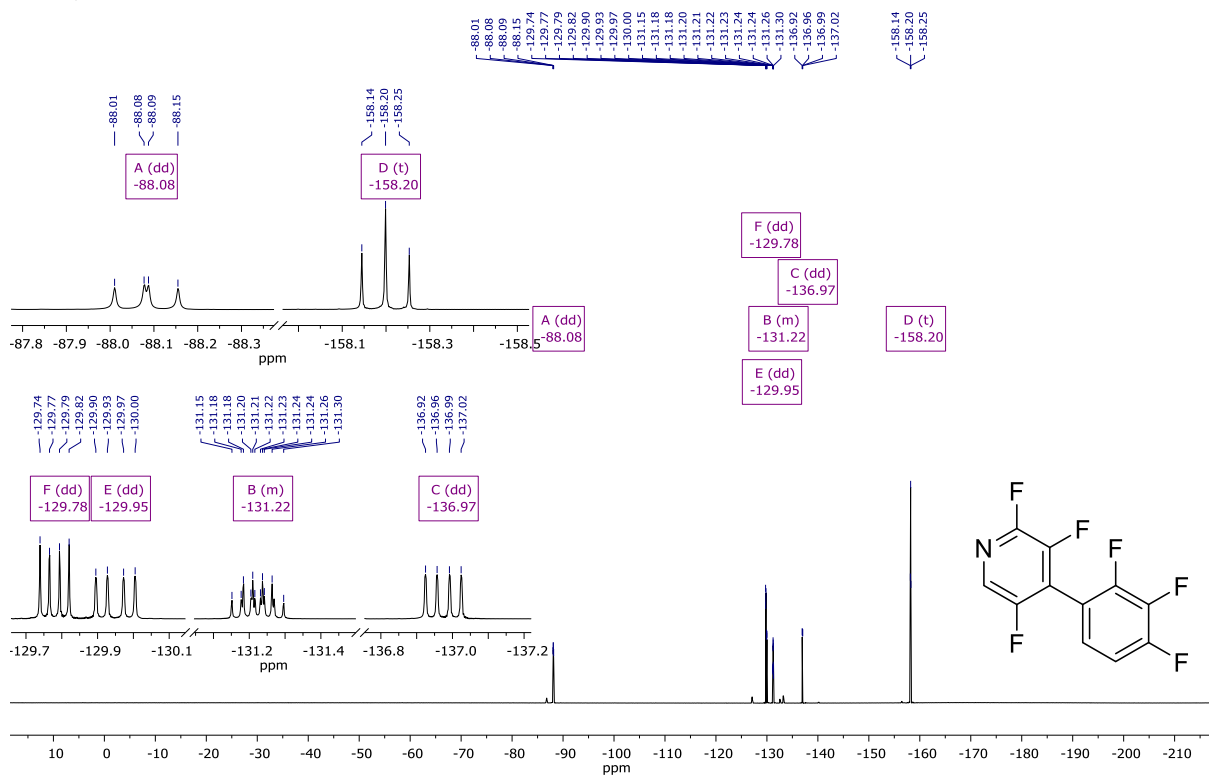Figure S109  $^{19}\text{F-NMR}$  { $^1\text{H}$ }: 2,3,5-Trifluoro-4-(2,3,4-trifluorophenyl)pyridine



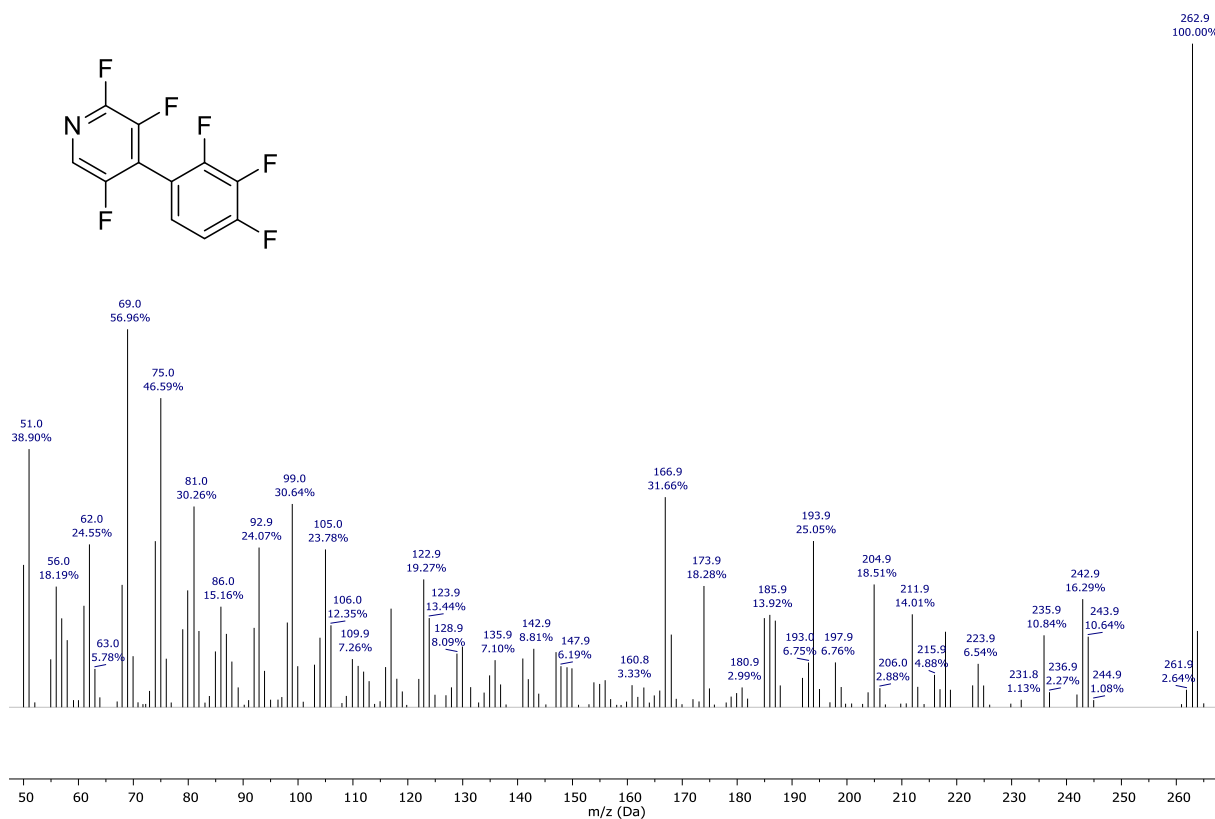Figure S111 EI-Spectrum (EI<sup>+</sup>): 2,3,5-Trifluoro-4-(2,3,4-trifluorophenyl)pyridine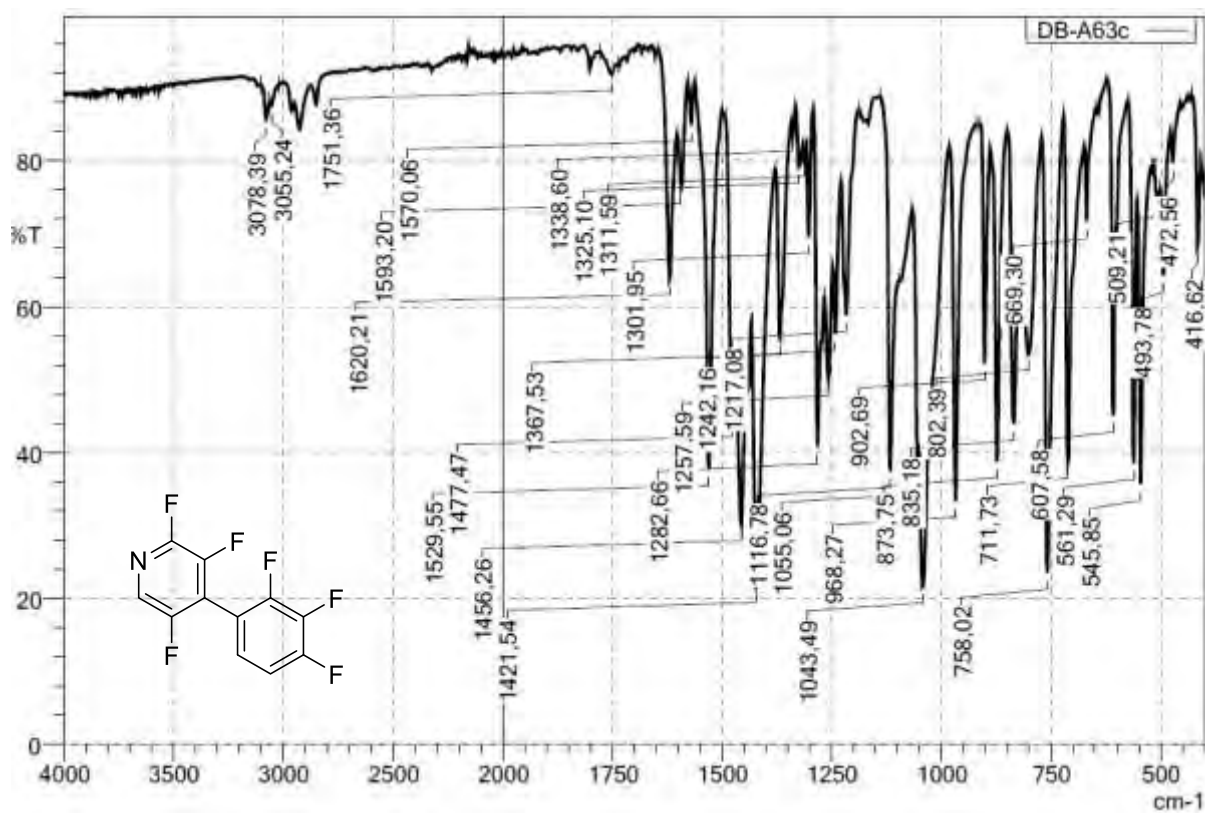

Figure S112 IR (ATR)-Spectrum: 2,3,5-Trifluoro-4-(2,3,4-trifluorophenyl)pyridine

## 2,3,5-Trifluoro-4-(2,3,4,5-tetrafluorophenyl)pyridine (37)

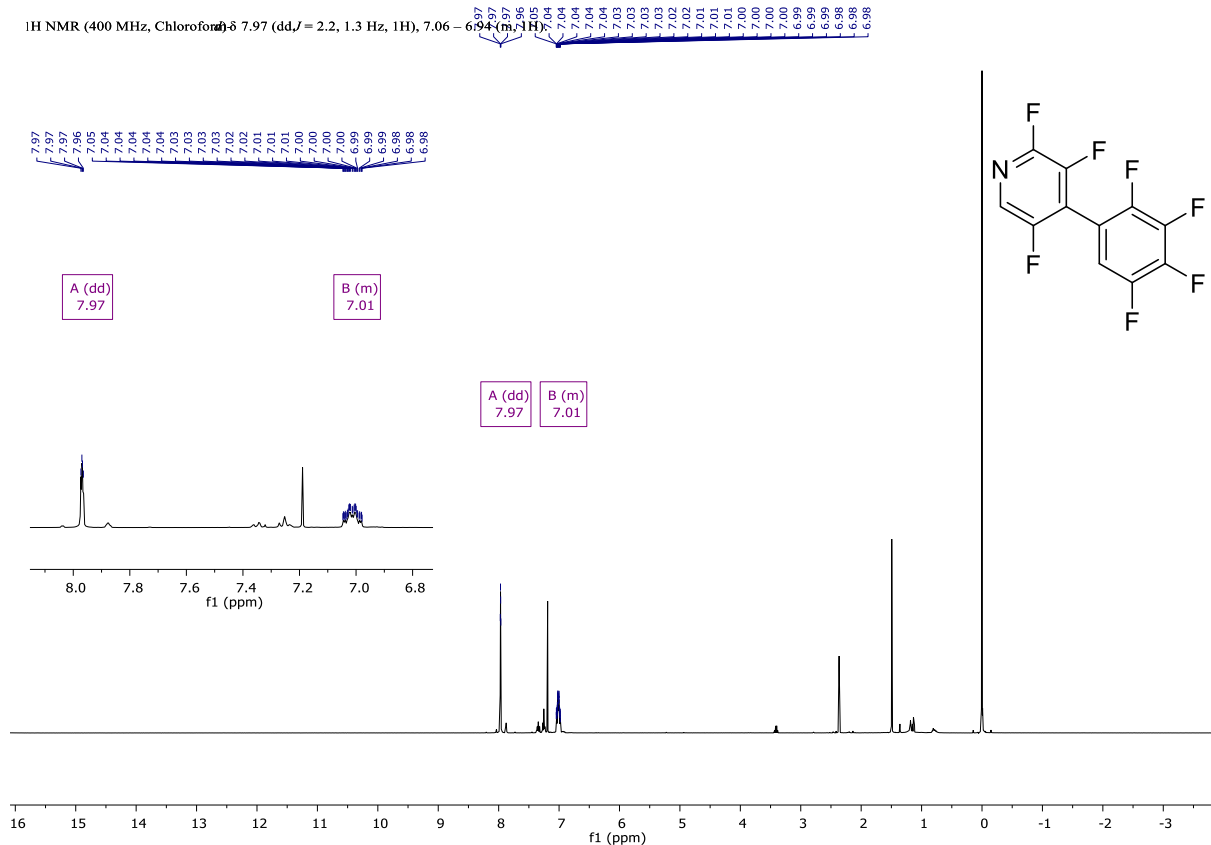Figure S113 <sup>1</sup>H-NMR: 2,3,5-Trifluoro-4-(2,3,4,5-tetrafluorophenyl)pyridine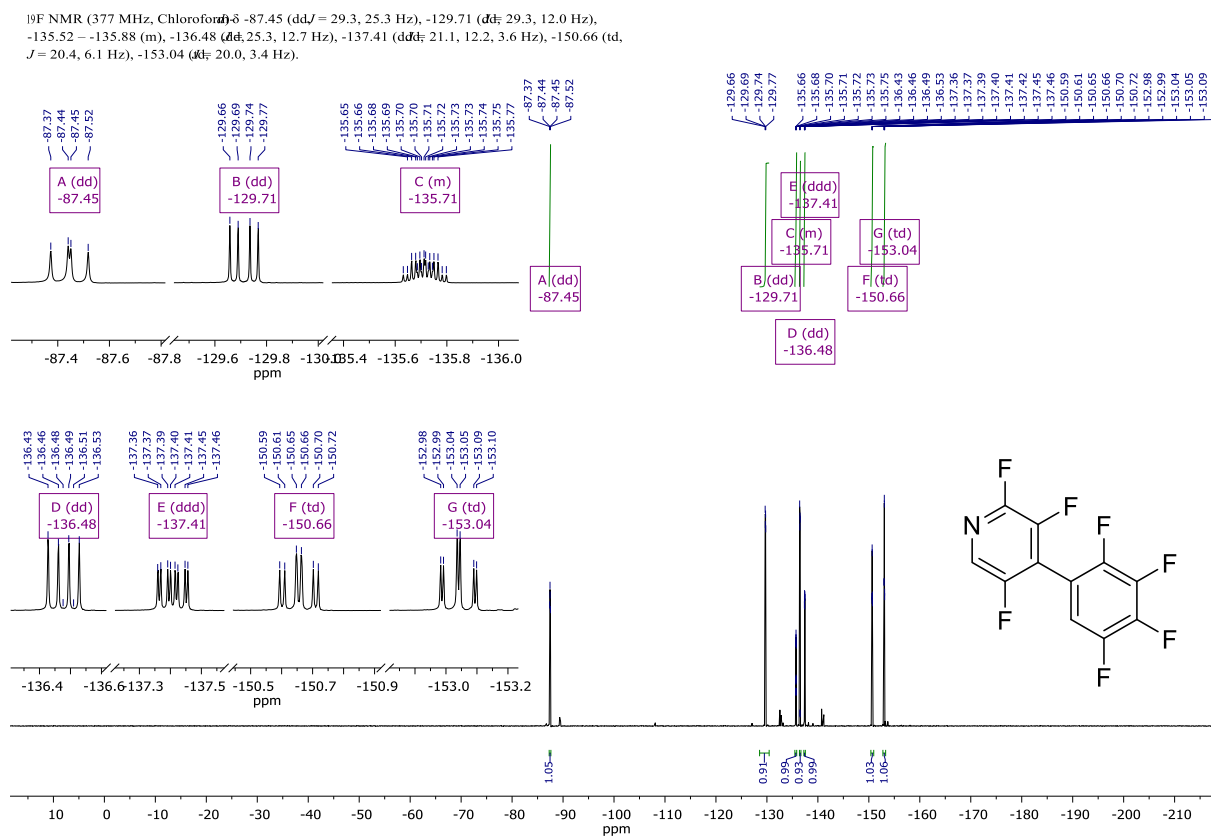Figure S114 <sup>19</sup>F-NMR {<sup>1</sup>H}: 2,3,5-Trifluoro-4-(2,3,4,5-tetrafluorophenyl)pyridine



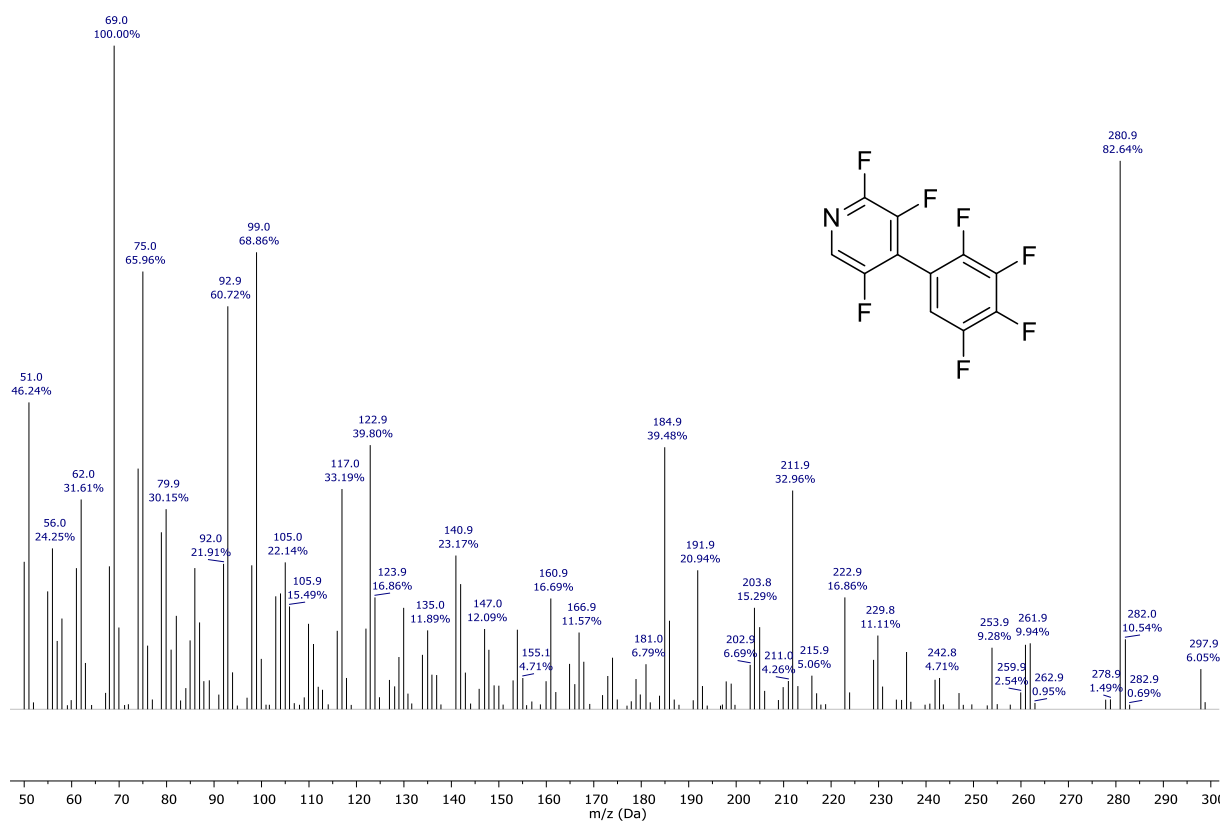Figure S116 EI-Spectrum (EI<sup>+</sup>): 2,3,5-Trifluoro-4-(2,3,4,5-tetrafluorophenyl)pyridine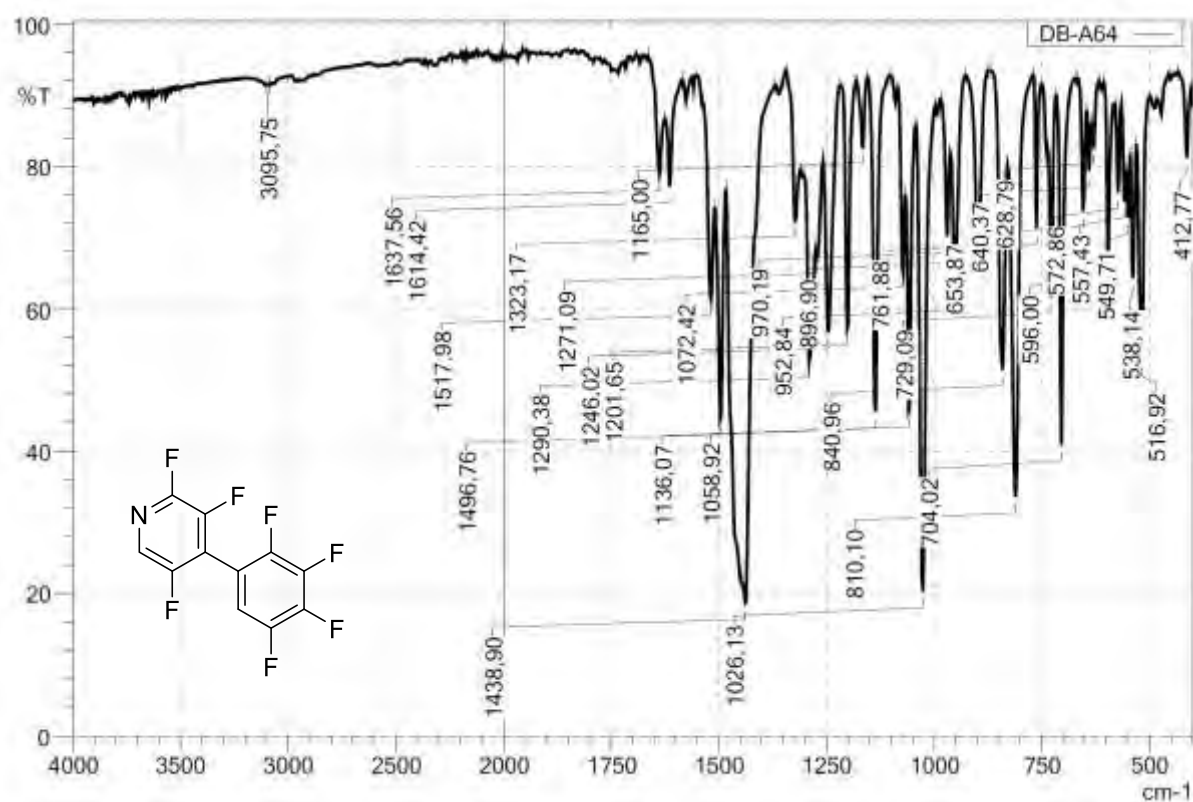

Figure S117 IR (ATR)-Spectrum: 2,3,5-Trifluoro-4-(2,3,4,5-tetrafluorophenyl)pyridine



## 4-(3,5-Difluorophenyl)-2,3,5,6-tetrafluoropyridine (38)

 $^1\text{H}$  NMR (400 MHz, Chloroform- $d_3$ )  $\delta$  7.11 – 7.08 (m, 1H), 7.01 (tt,  $J = 8.7, 2.3$  Hz, 1H).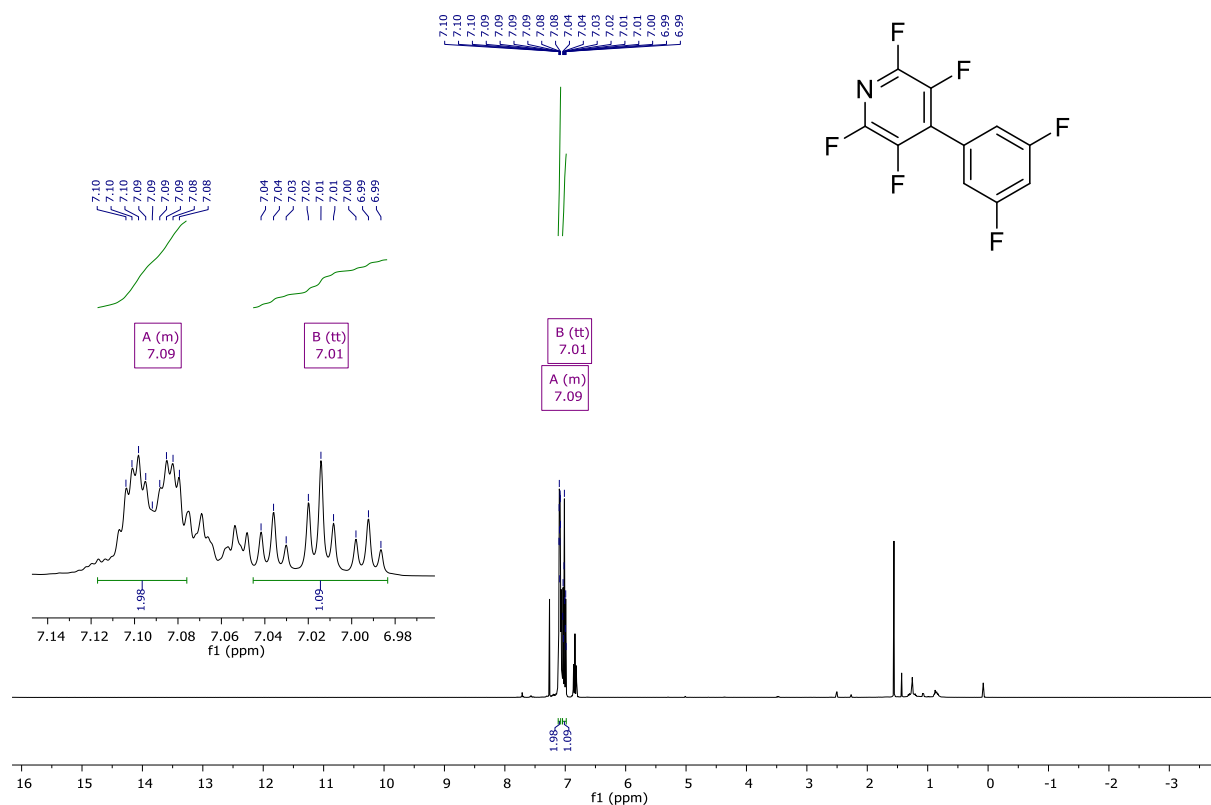Figure S118  $^1\text{H}$ -NMR: 2,3,5-Trifluoro-4-(2,3,4,5-tetrafluorophenyl)pyridine $^{19}\text{F}$  NMR (377 MHz, Chloroform- $d_3$ )  $\delta$  -89.34 – -89.57 (m), -107.57, -144.18 – -144.40 (m).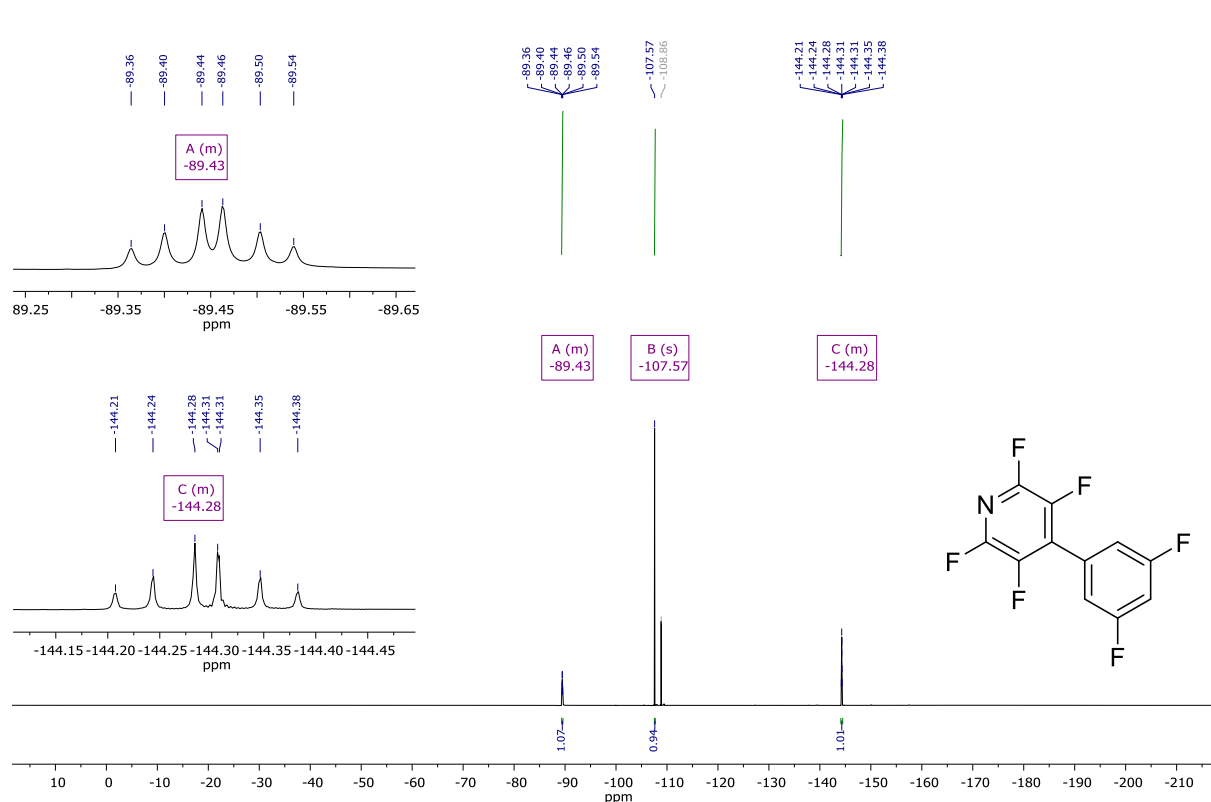Figure S119  $^{19}\text{F}$ -NMR [ $^1\text{H}$ ]: 2,3,5-Trifluoro-4-(2,3,4,5-tetrafluorophenyl)pyridine

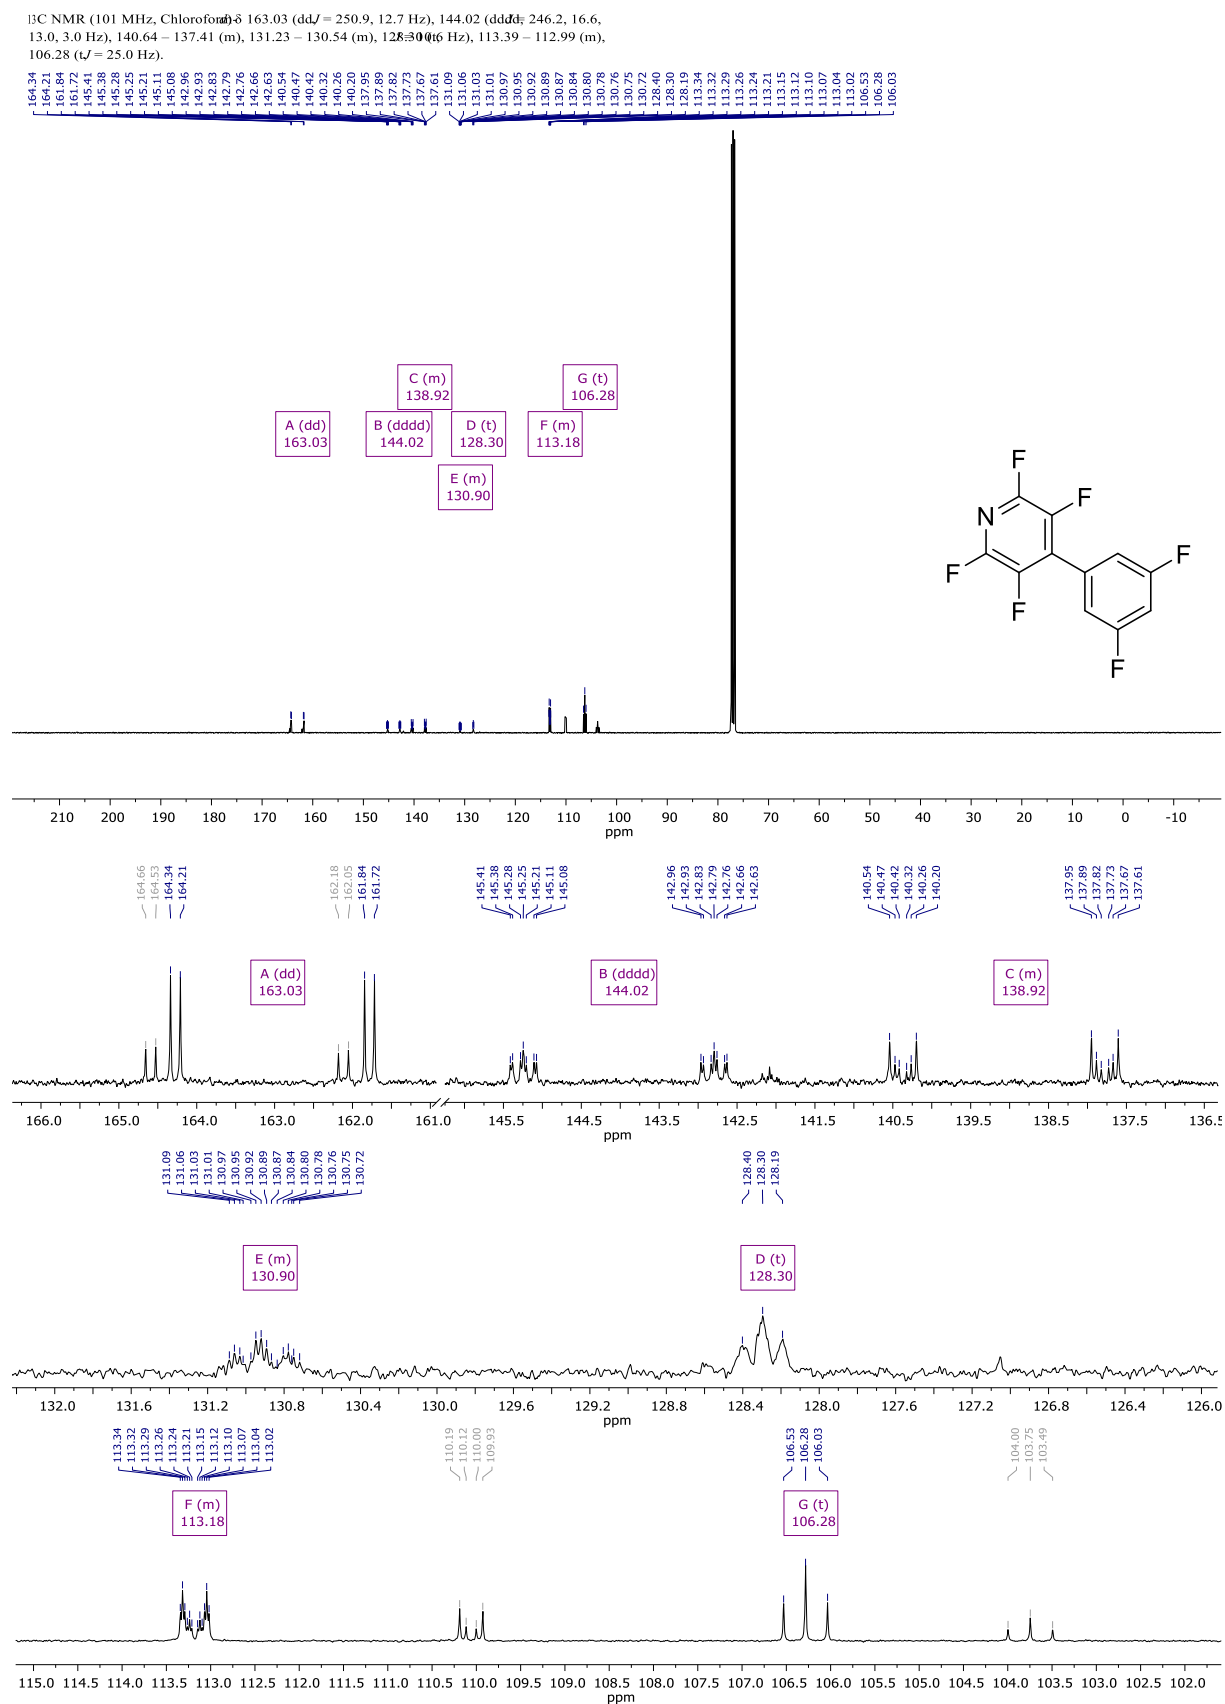Figure S120  $^{13}\text{C}$  NMR: 2,3,5-Trifluoro-4-(2,3,4,5-tetrafluorophenyl)pyridine

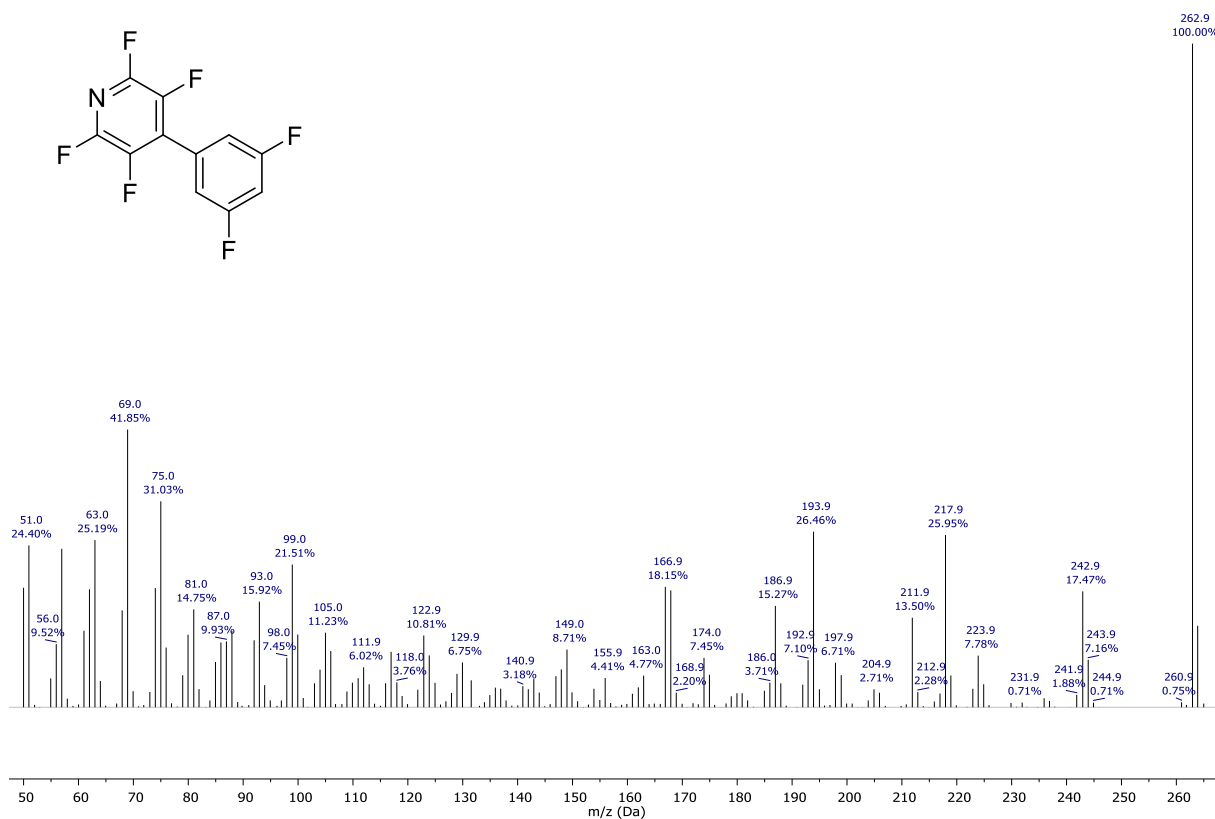Figure S121 EI-Spectrum (EI<sup>+</sup>): 2,3,5-Trifluoro-4-(2,3,4,5-tetrafluorophenyl)pyridine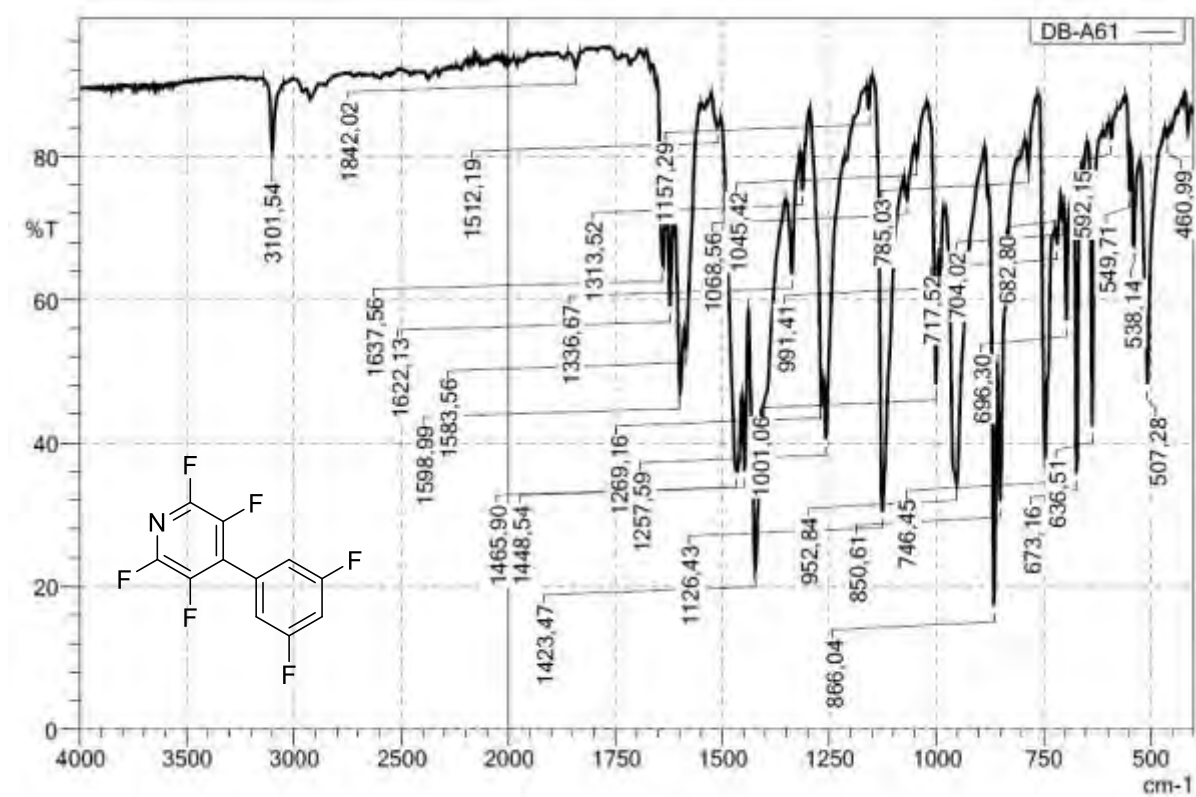

Figure S122 IR (ATR)-Spectrum: 2,3,5-Trifluoro-4-(2,3,4,5-tetrafluorophenyl)pyridine

## 2,3,5,6-Tetrafluoro-4-(3,4,5-trifluorophenyl)pyridine (39)

 $^1\text{H NMR}$  (400 MHz, Chloroform- $d_3$ )  $\delta$  7.18 – 7.11 (m, 2H).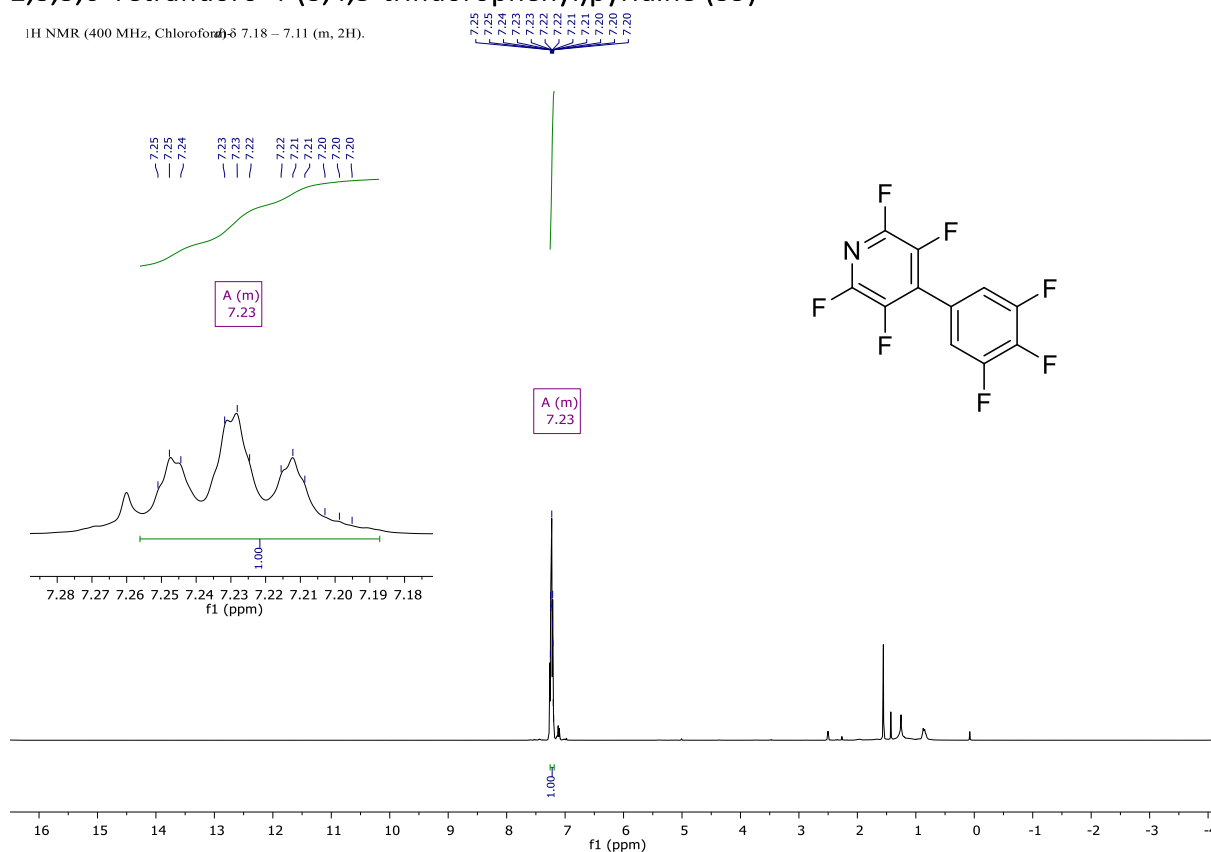Figure S123  $^1\text{H-NMR}$ : 2,3,5,6-Tetrafluoro-4-(3,4,5-trifluorophenyl)pyridine $^{19}\text{F NMR}$  (377 MHz, Chloroform- $d_3$ )  $\delta$  -89.04 – -89.27 (m), -131.96 (d, 20.4 Hz), -144.43 – -144.68 (m), -155.48 (t, 20.5 Hz).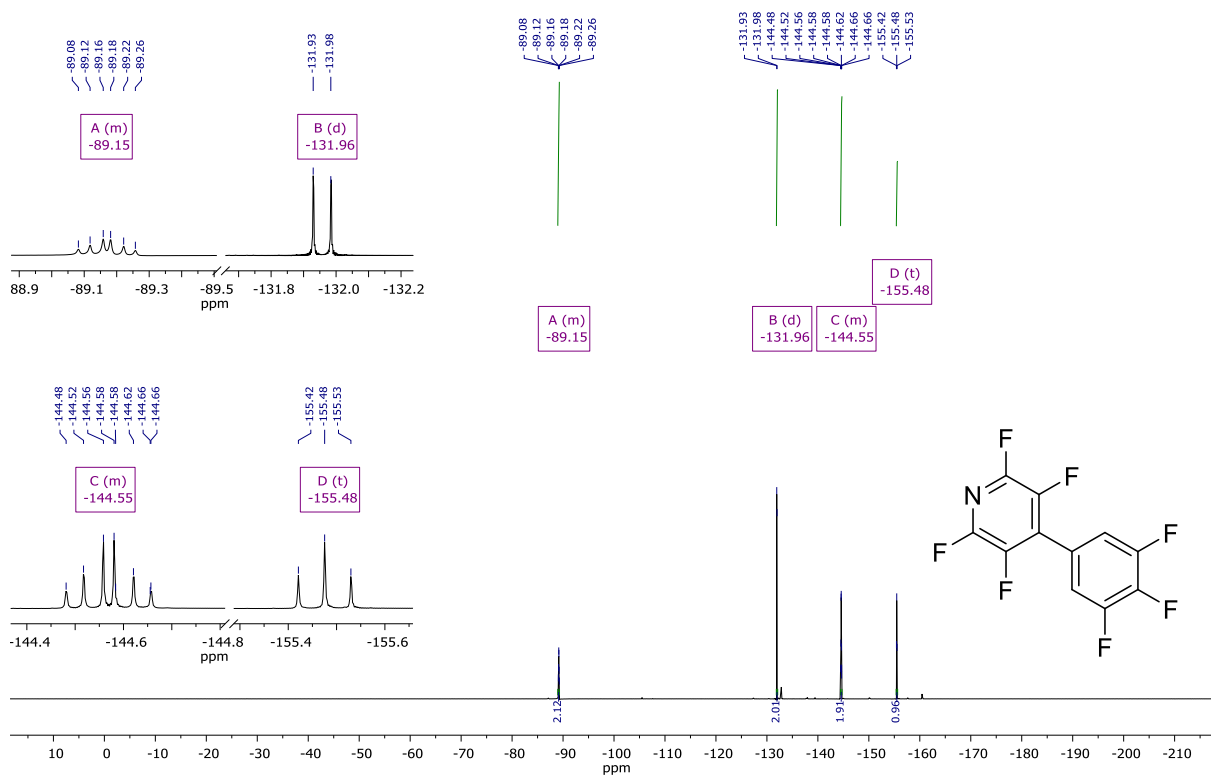Figure S124  $^{19}\text{F-NMR}$  [ $^1\text{H}$ ]: 2,3,5,6-Tetrafluoro-4-(3,4,5-trifluorophenyl)pyridine

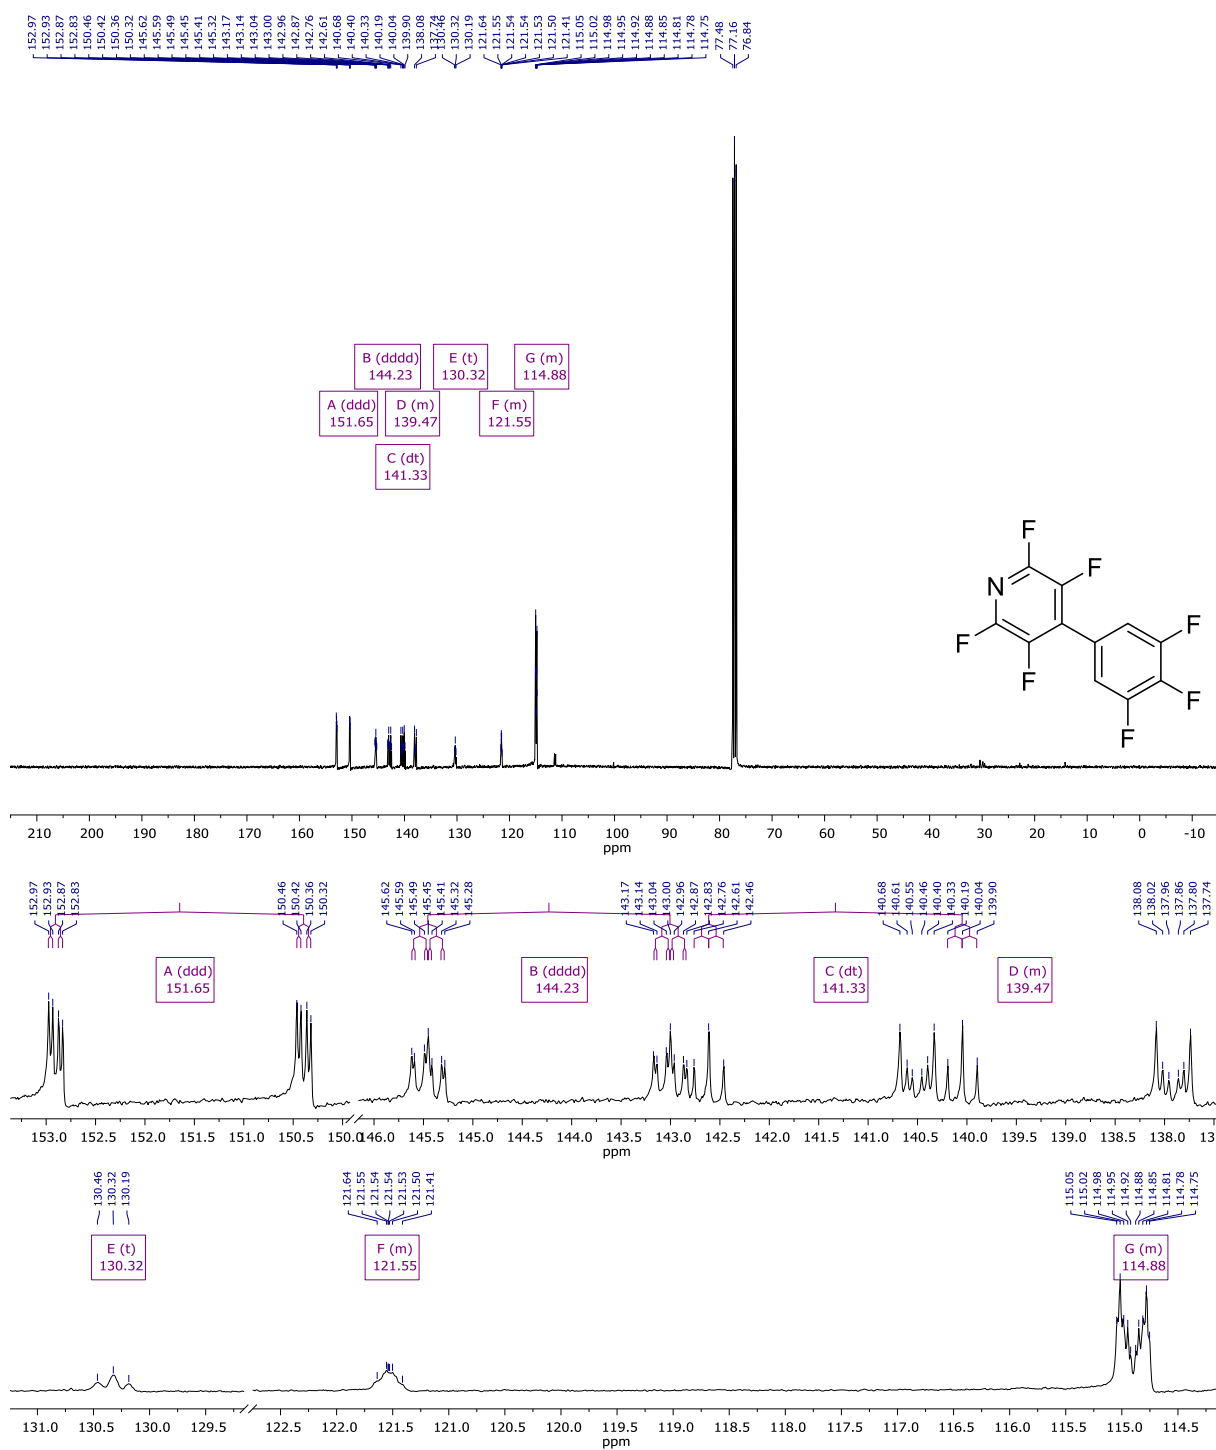Figure S125 <sup>13</sup>C NMR: 2,3,5,6-Tetrafluoro-4-(3,4,5-trifluorophenyl)pyridine

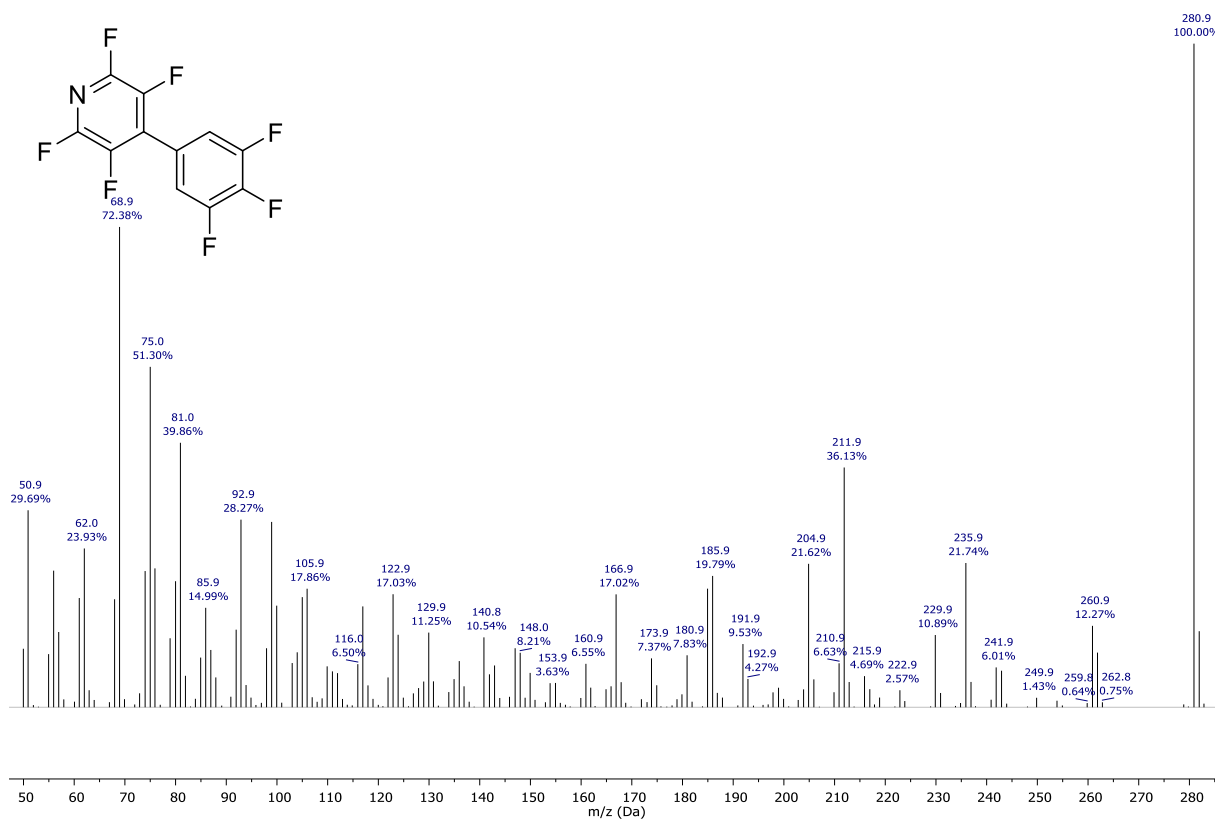Figure S126 EI-Spectrum (EI<sup>+</sup>): 2,3,5,6-Tetrafluoro-4-(3,4,5-trifluorophenyl)pyridine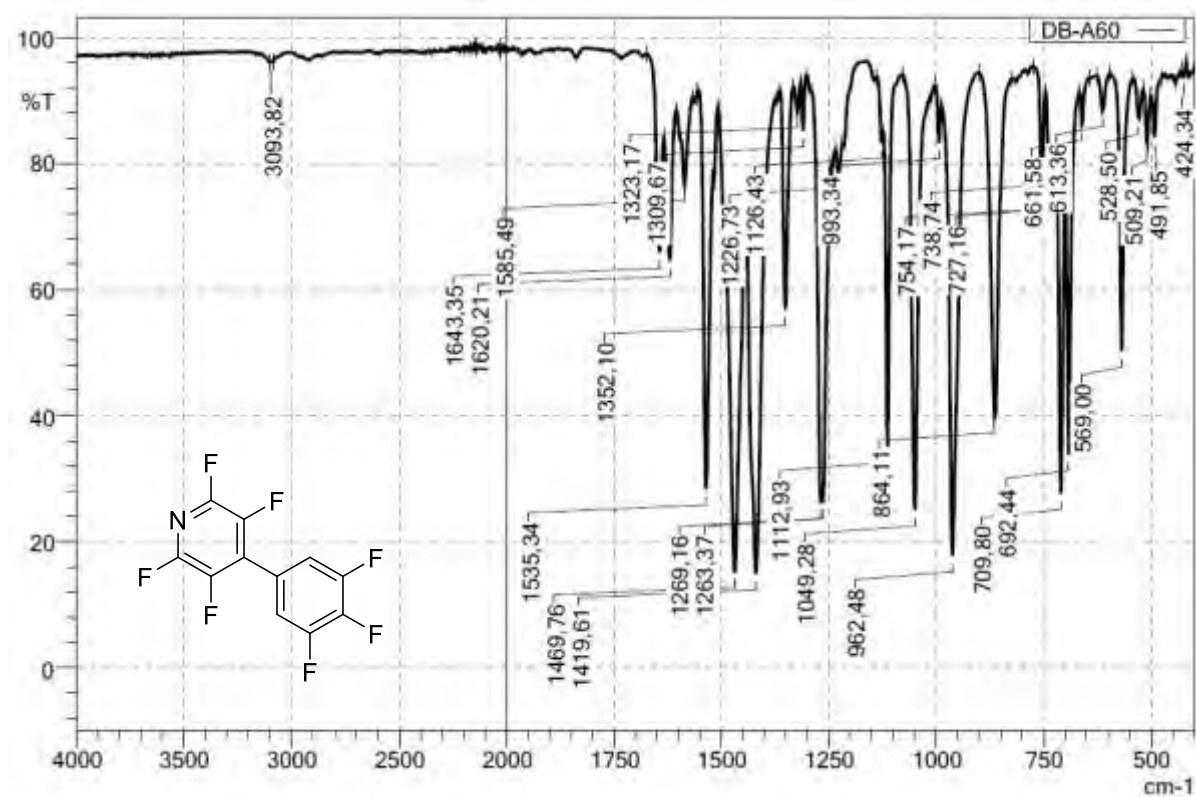

Figure S127 IR (ATR)-Spectrum: 2,3,5,6-Tetrafluoro-4-(3,4,5-trifluorophenyl)pyridine

## Iodobenzenes and Iodopyridines

## 1,2,4,5-Tetrafluoro-3-iodobenzene (1)

 $^{19}\text{F}$  NMR (235 MHz, Chloroform- $d_3$ )  $\delta$  -119.72 – -120.55 (m), -135.82 – -137.51 (m).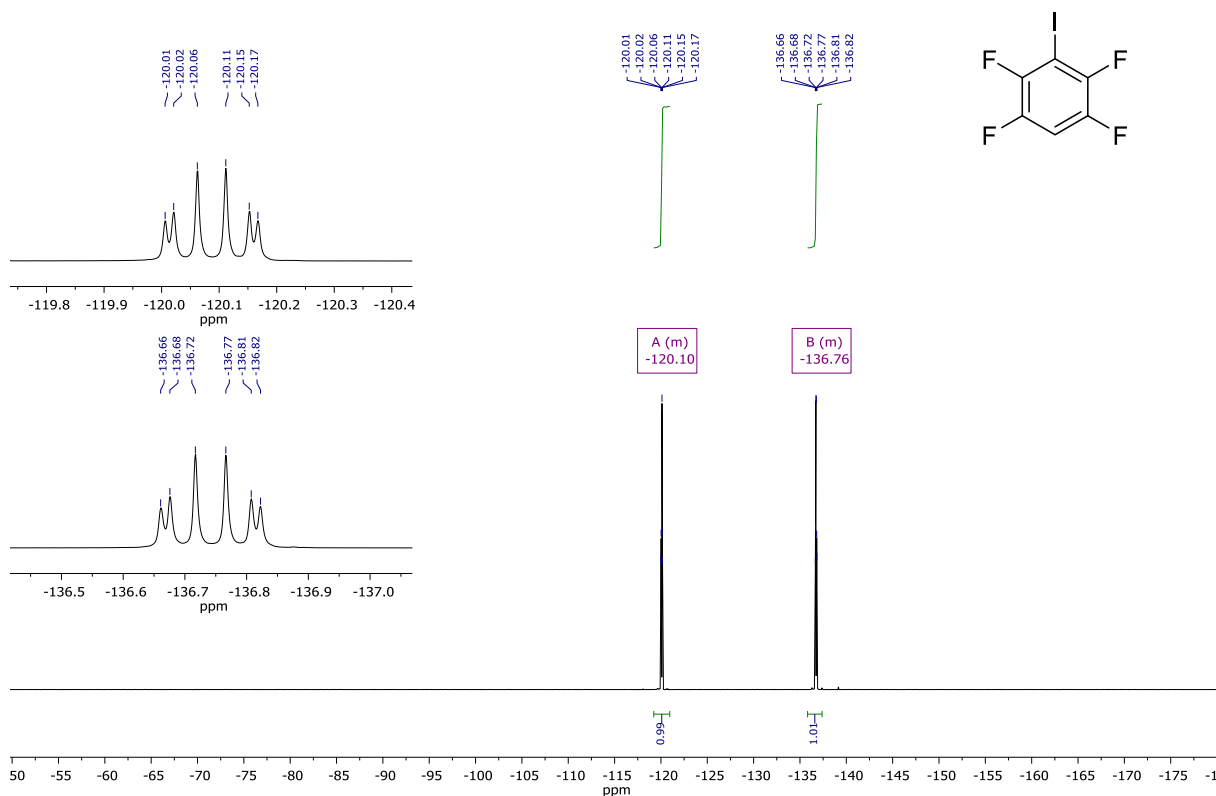Figure S128  $^{19}\text{F}$ -NMR  $\{^1\text{H}\}$ : 1,2,4,5-Tetrafluoro-3-iodobenzene $^1\text{H}$  NMR (250 MHz, Chloroform- $d_3$ )  $\delta$  7.16 (tt,  $J$  = 9.6, 7.2 Hz, 1H).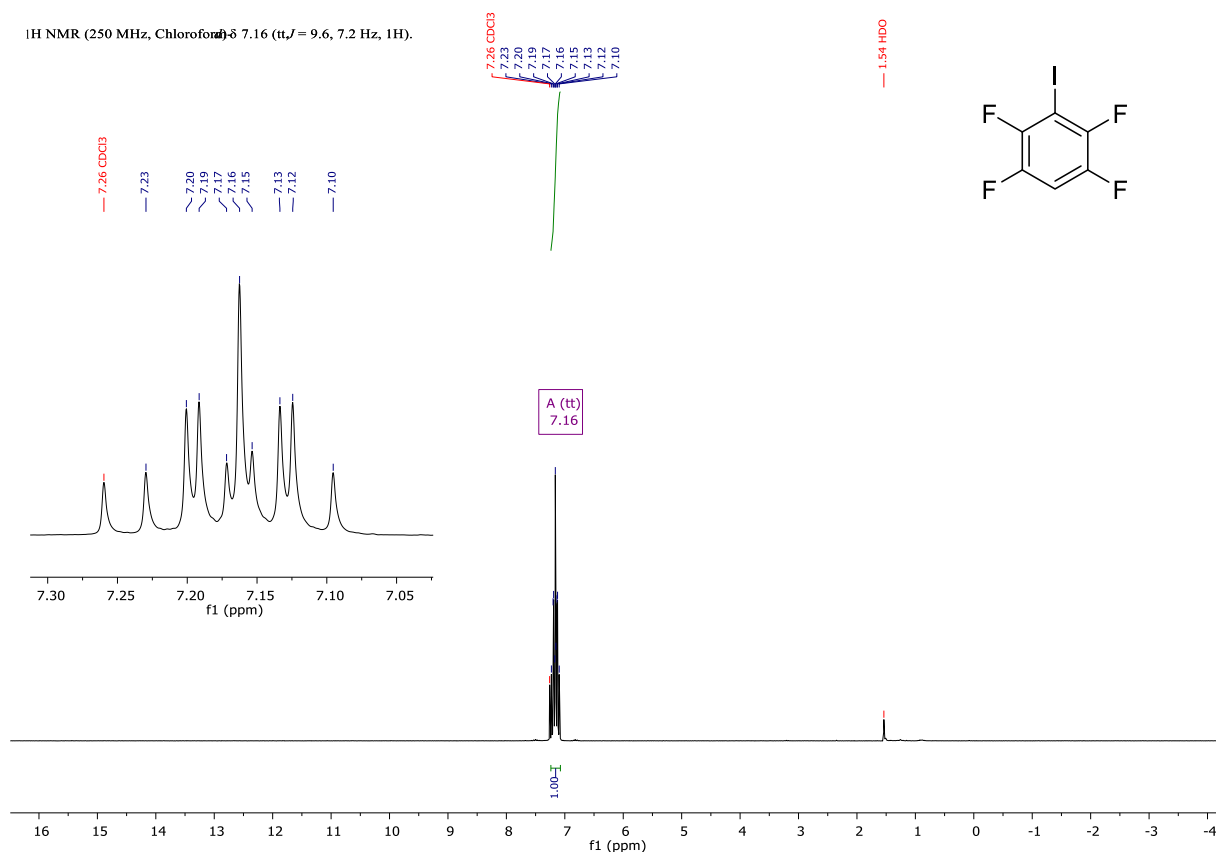Figure S129  $^1\text{H}$ -NMR: 1,2,4,5-Tetrafluoro-3-iodobenzene

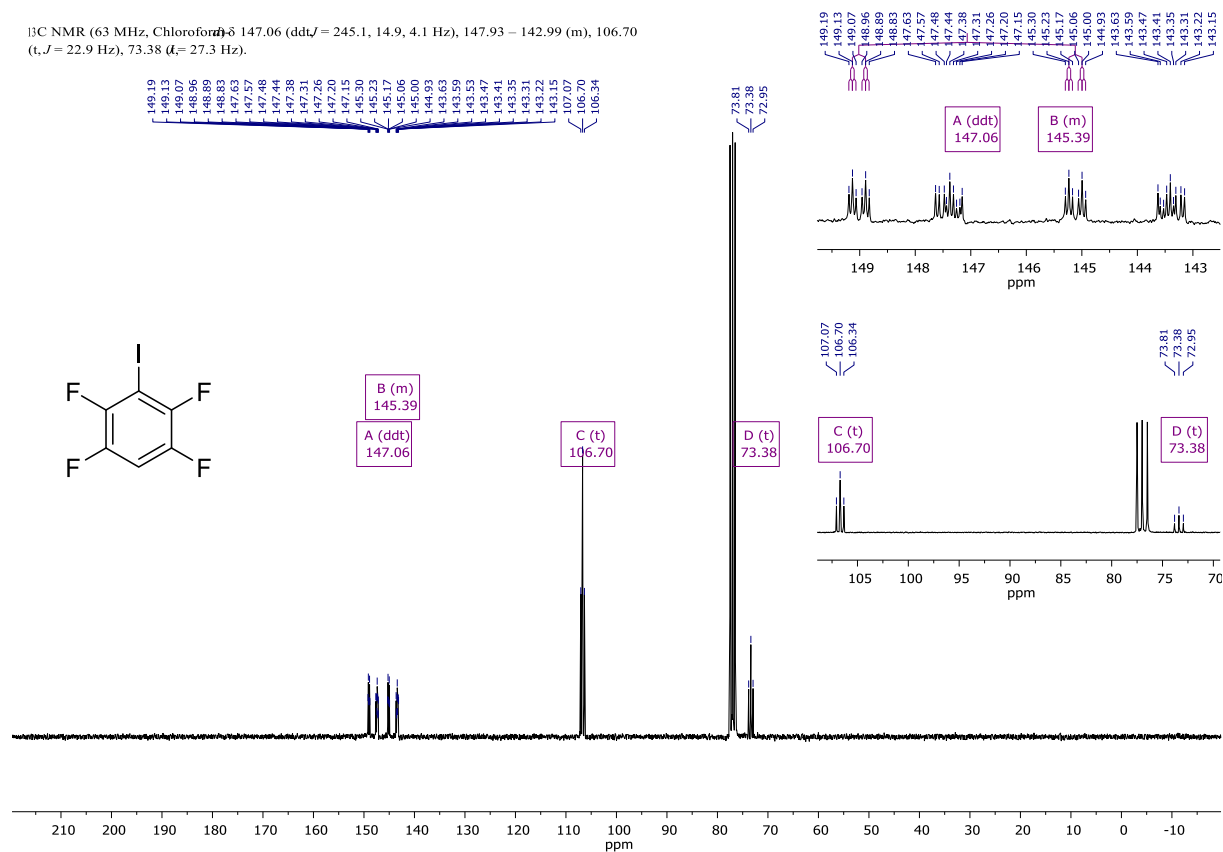Figure S130  $^{13}\text{C}$  NMR: 1,2,4,5-Tetrafluoro-3-iodobenzene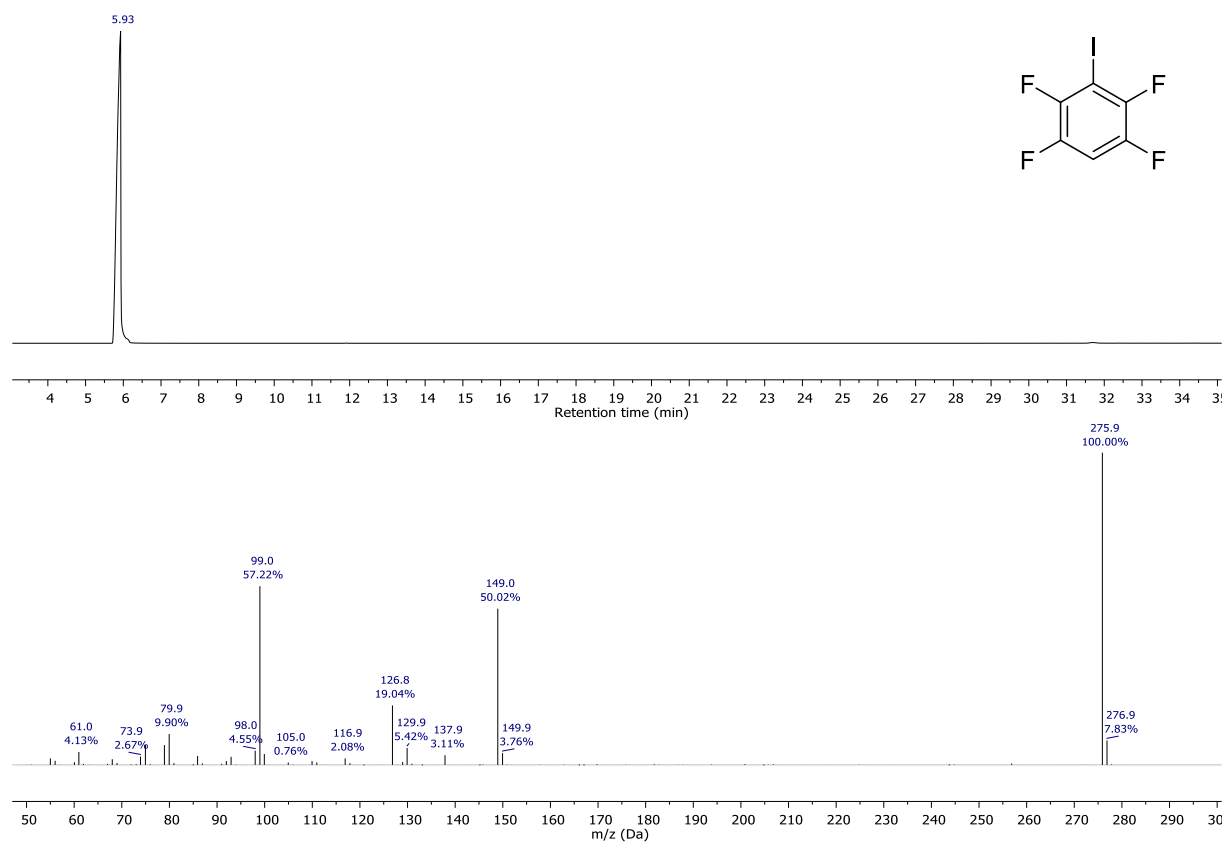Figure S131 GC/MS-Spectrum with EI-Spectrum (EI $^+$ ): 1,2,4,5-Tetrafluoro-3-iodobenzene



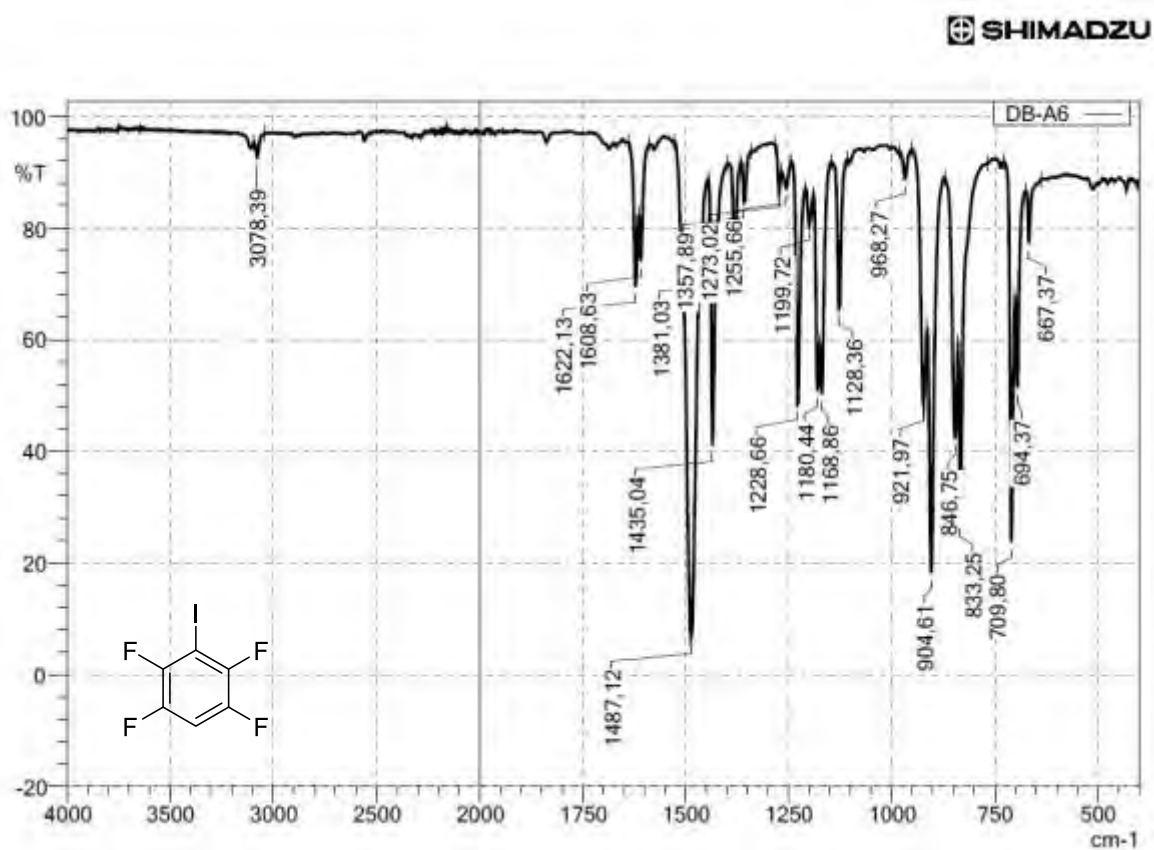

Figure S132 IR (ATR)-Spectrum: 1,2,4,5-Tetrafluoro-3-iodobenzene

**1,2,3,5-Tetrafluoro-4-iodobenzene (40)**<sup>1</sup>H NMR (250 MHz, Chloroform-d) δ 7.12 – 6.67 (m, 1H).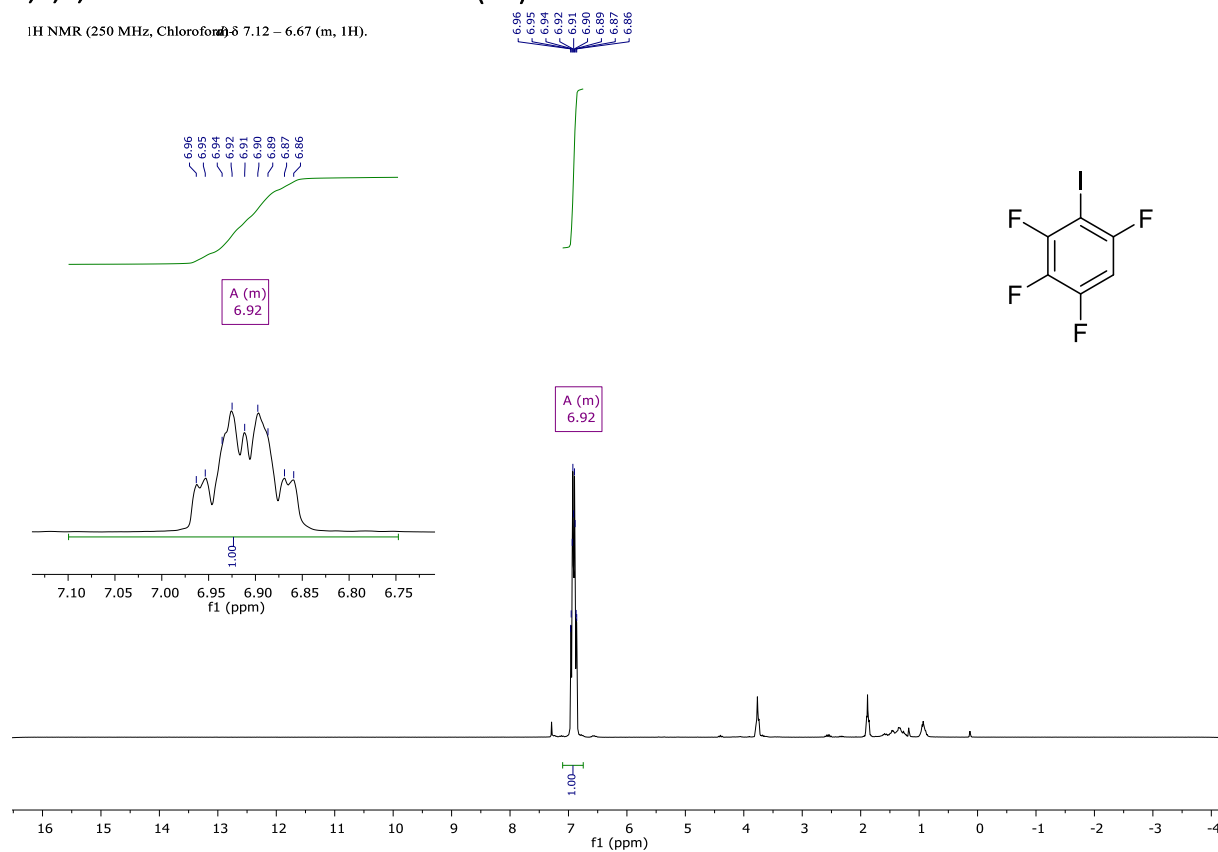**Figure S133 <sup>1</sup>H-NMR: 1,2,3,5-Tetrafluoro-4-iodobenzene**

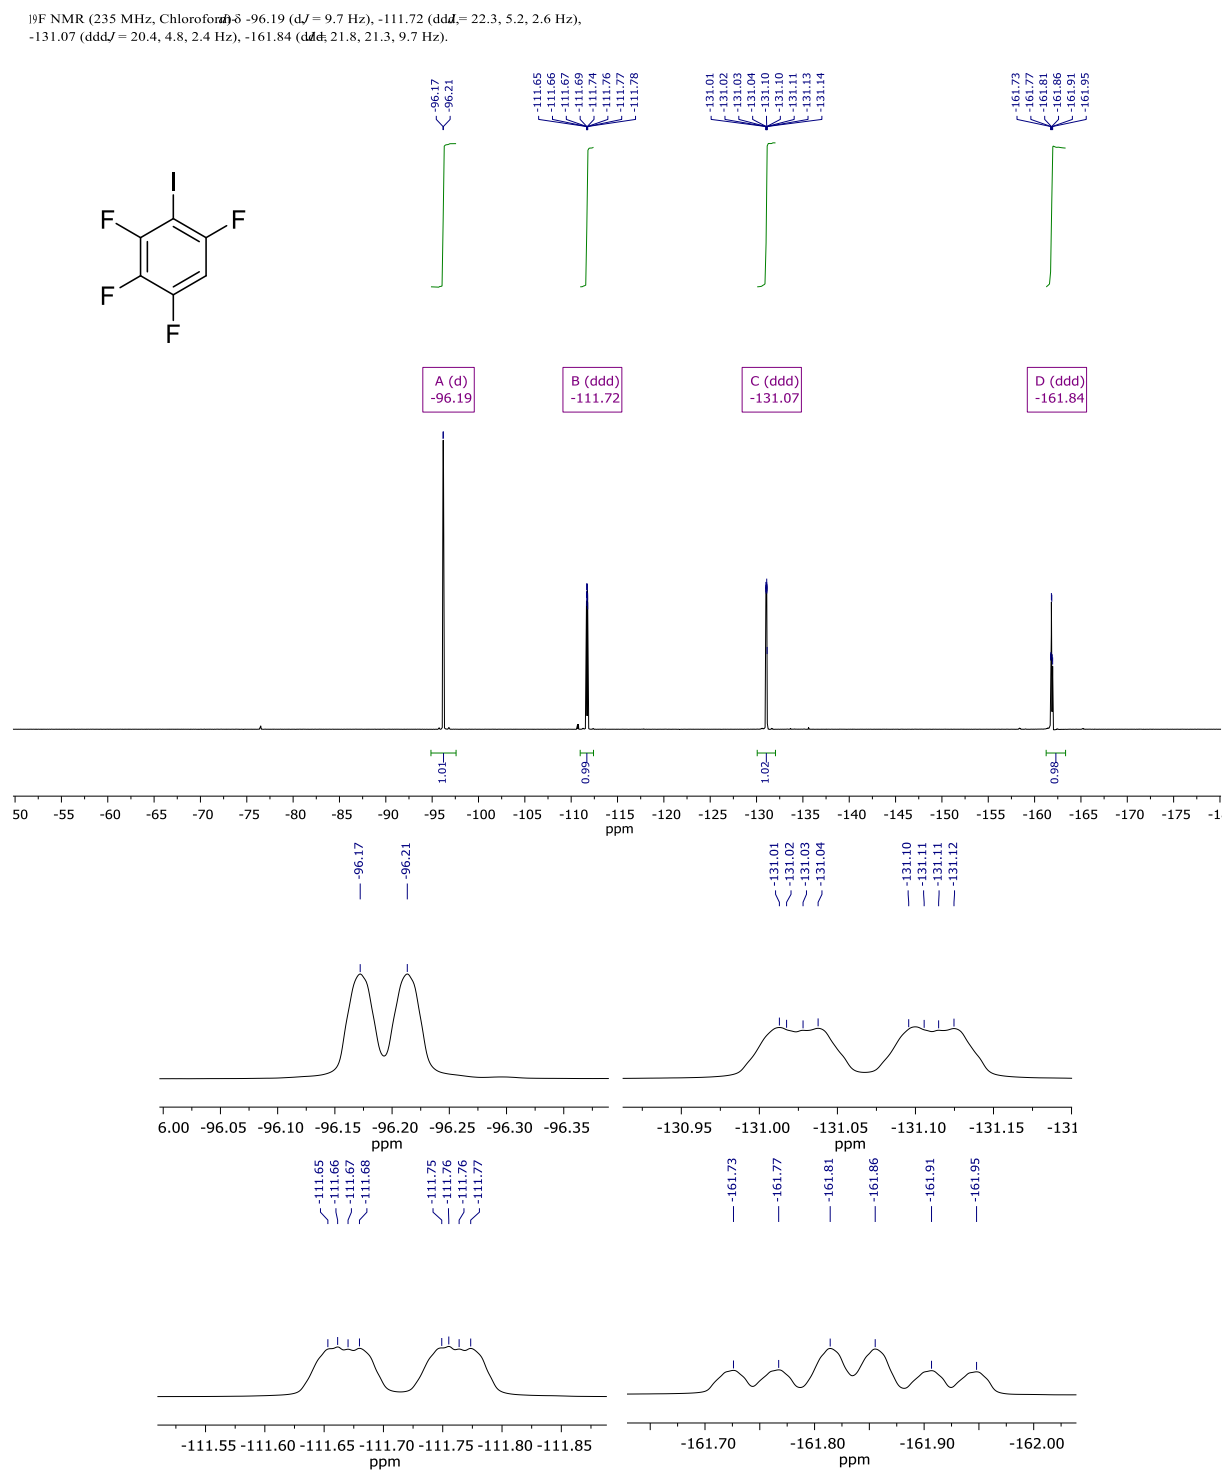Figure S134  $^{19}\text{F}$ -NMR  $\{^1\text{H}\}$ : 1,2,3,5-Tetrafluoro-4-iodobenzene

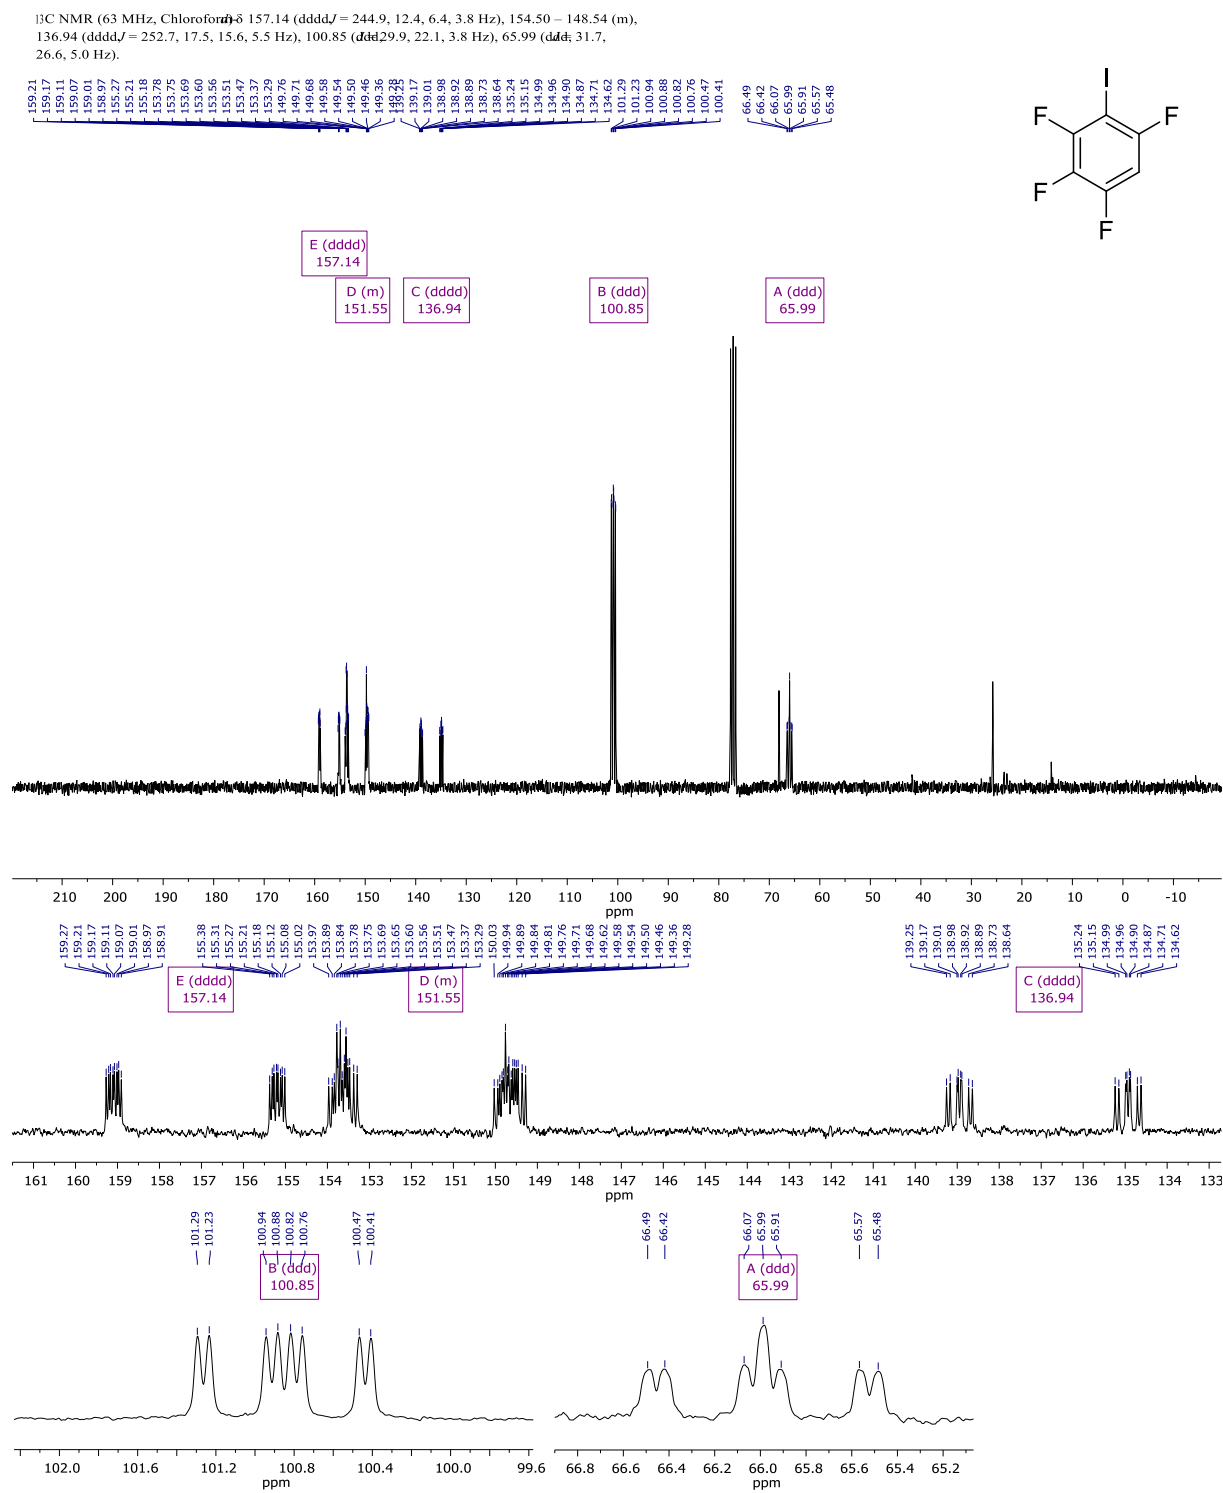Figure S135  $^{13}\text{C}$  NMR: 1,2,3,5-Tetrafluoro-4-iodobenzene

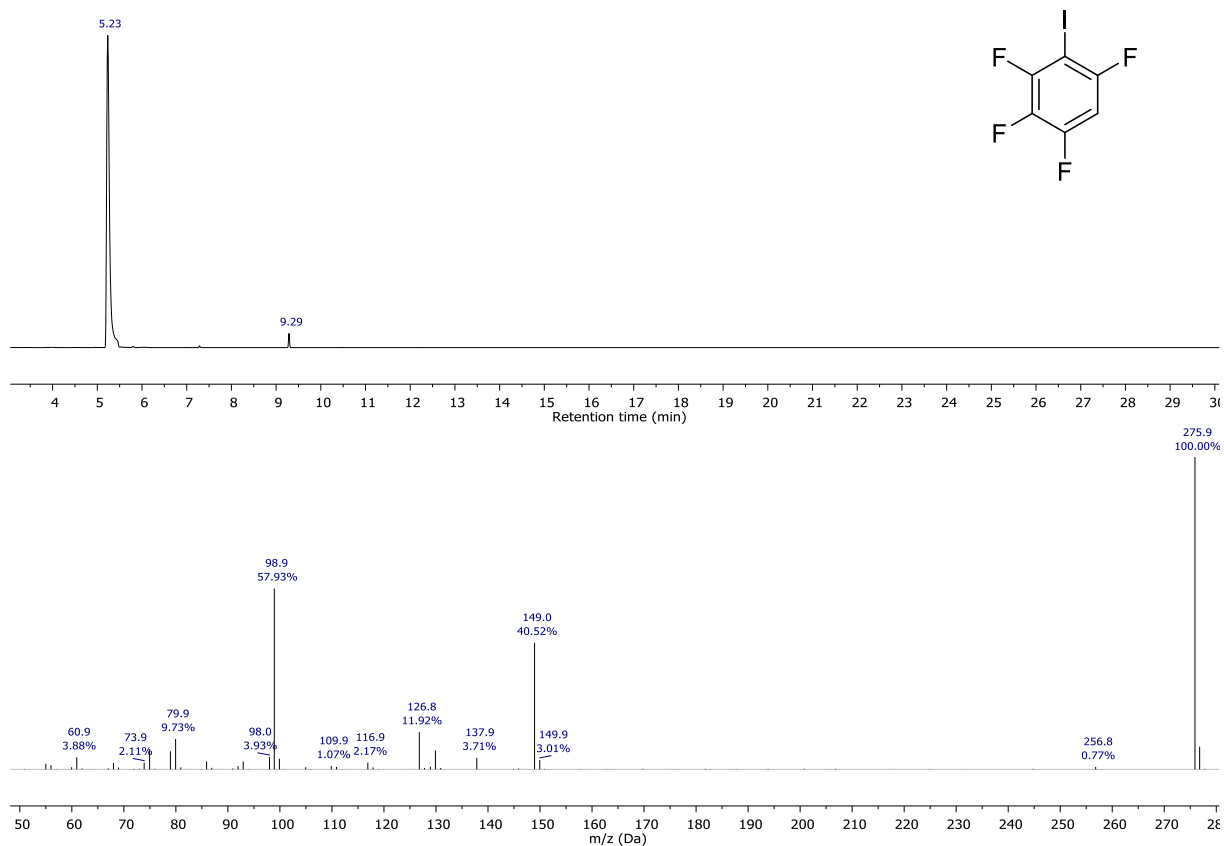Figure S136 GC/MS-Spectrum EI-Spectrum (EI<sup>+</sup>): 1,2,3,5-Tetrafluoro-4-iodobenzene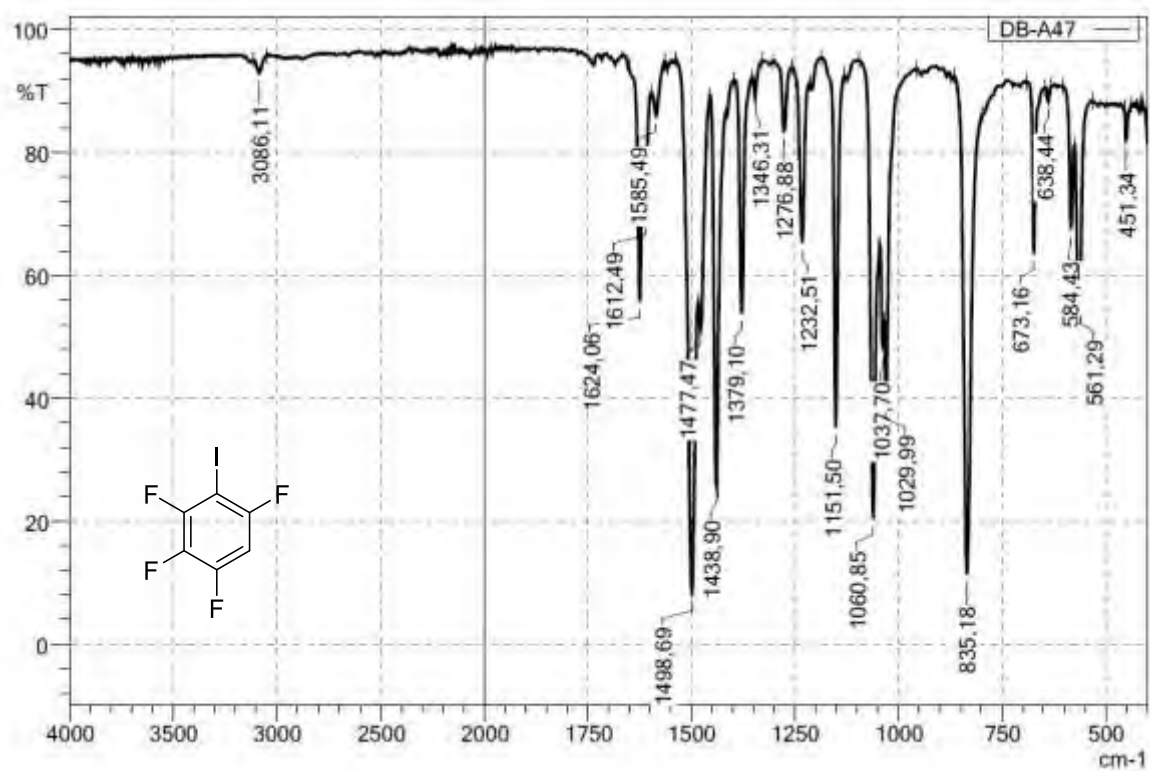

Figure S137 IR (ATR)-Spectrum: 1,2,3,5-Tetrafluoro-4-iodobenzene

## 2,3,5-Trifluoro-4-iodopyridine (41)

<sup>1</sup>H NMR (250 MHz, Chloroform-d)  $\delta$  7.83 – 7.79 (m, 1H).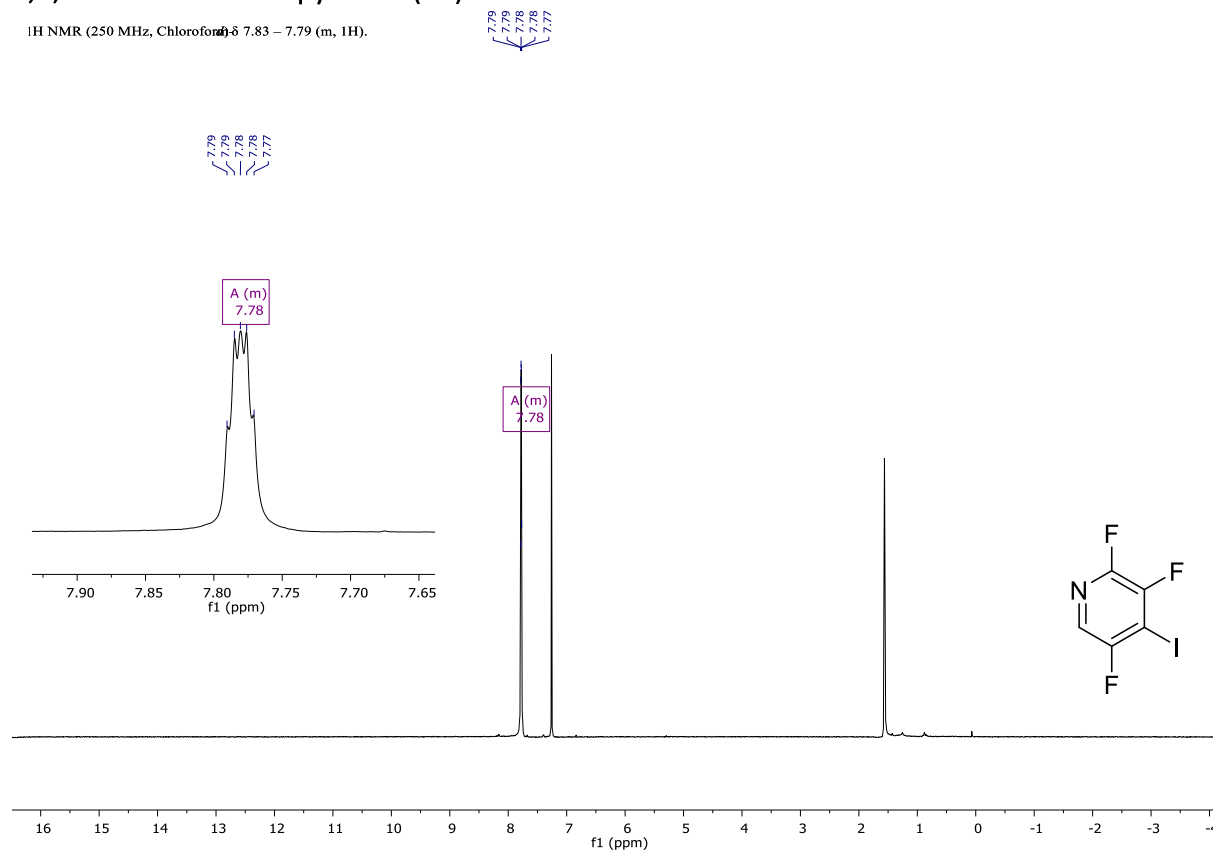Figure S138 <sup>1</sup>H-NMR: 2,3,5-Trifluoro-4-iodopyridine<sup>19</sup>F NMR (235 MHz, Chloroform-d)  $\delta$  -87.89 ( $J$  = 26.4 Hz), -111.85 ( $d$  = 27.2 Hz), -116.94 ( $d$  = 24.7 Hz).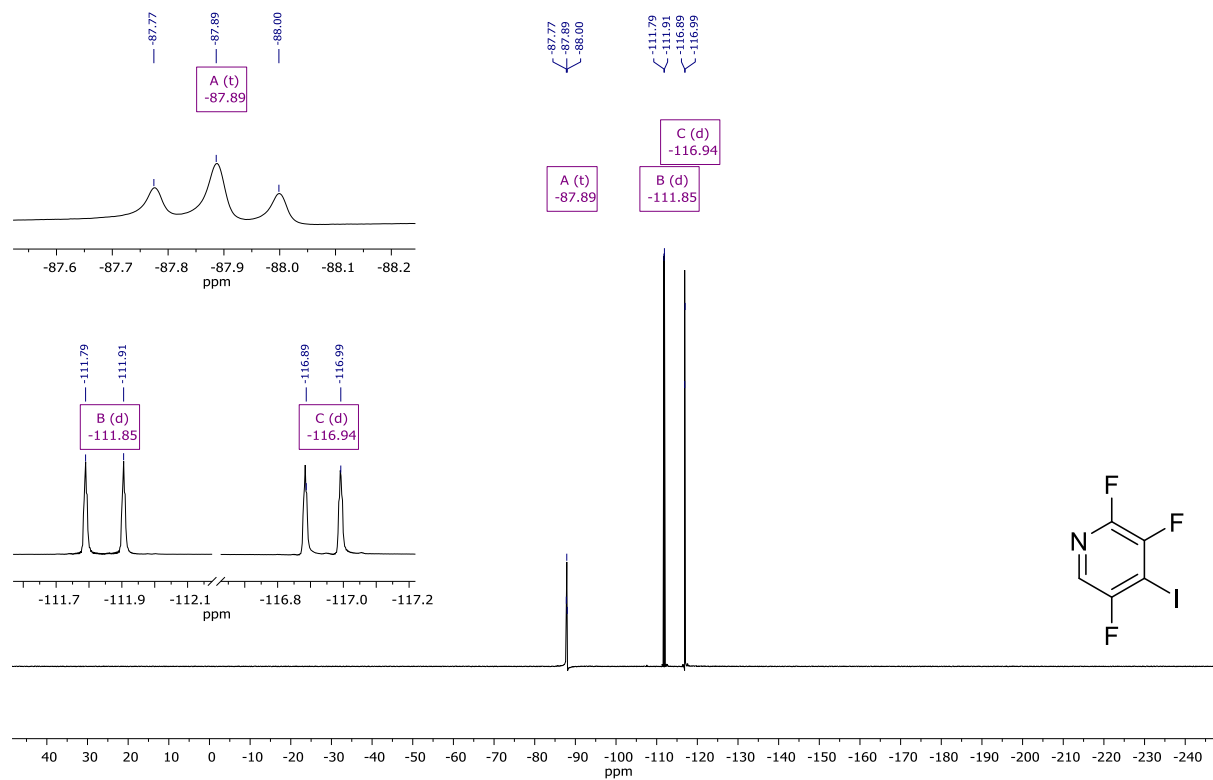Figure S139 <sup>19</sup>F-NMR {<sup>1</sup>H}: 2,3,5-Trifluoro-4-iodopyridine

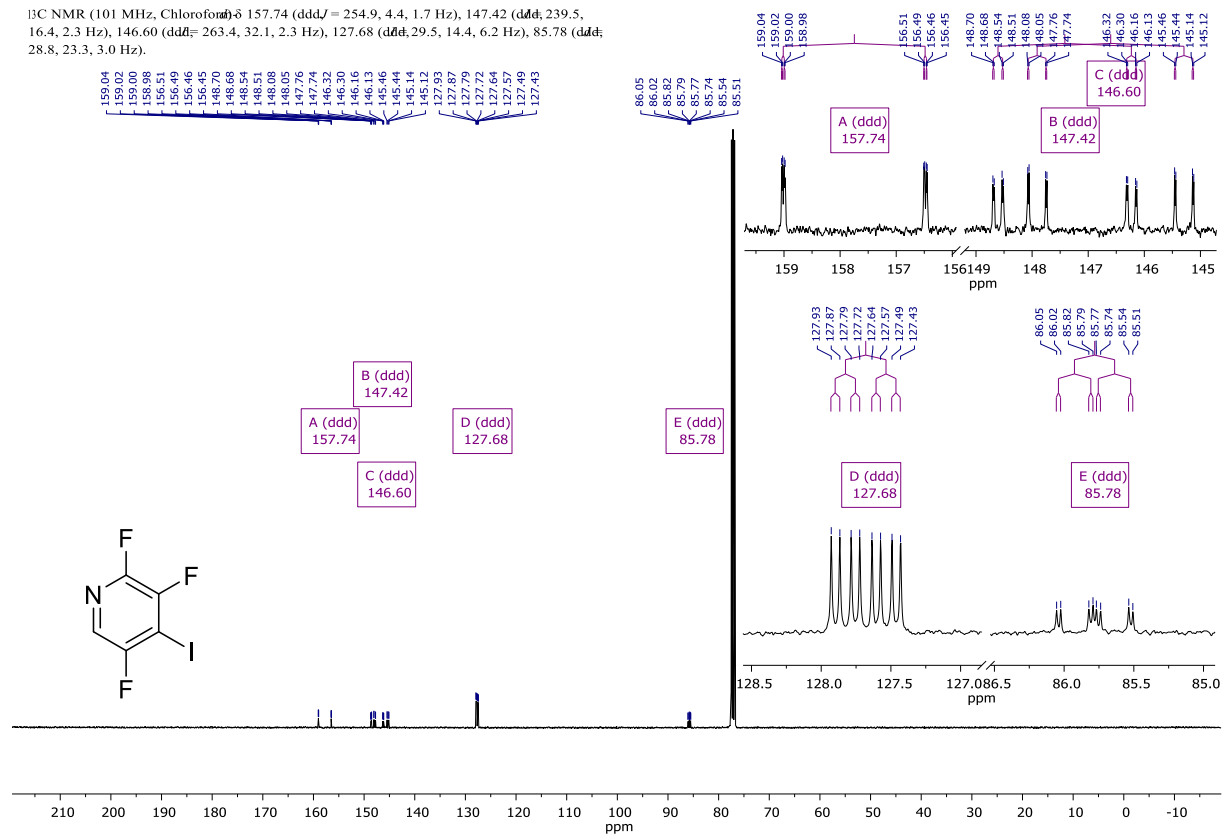Figure S140  $^{13}\text{C}$  NMR: 2,3,5-Trifluoro-4-iodopyridine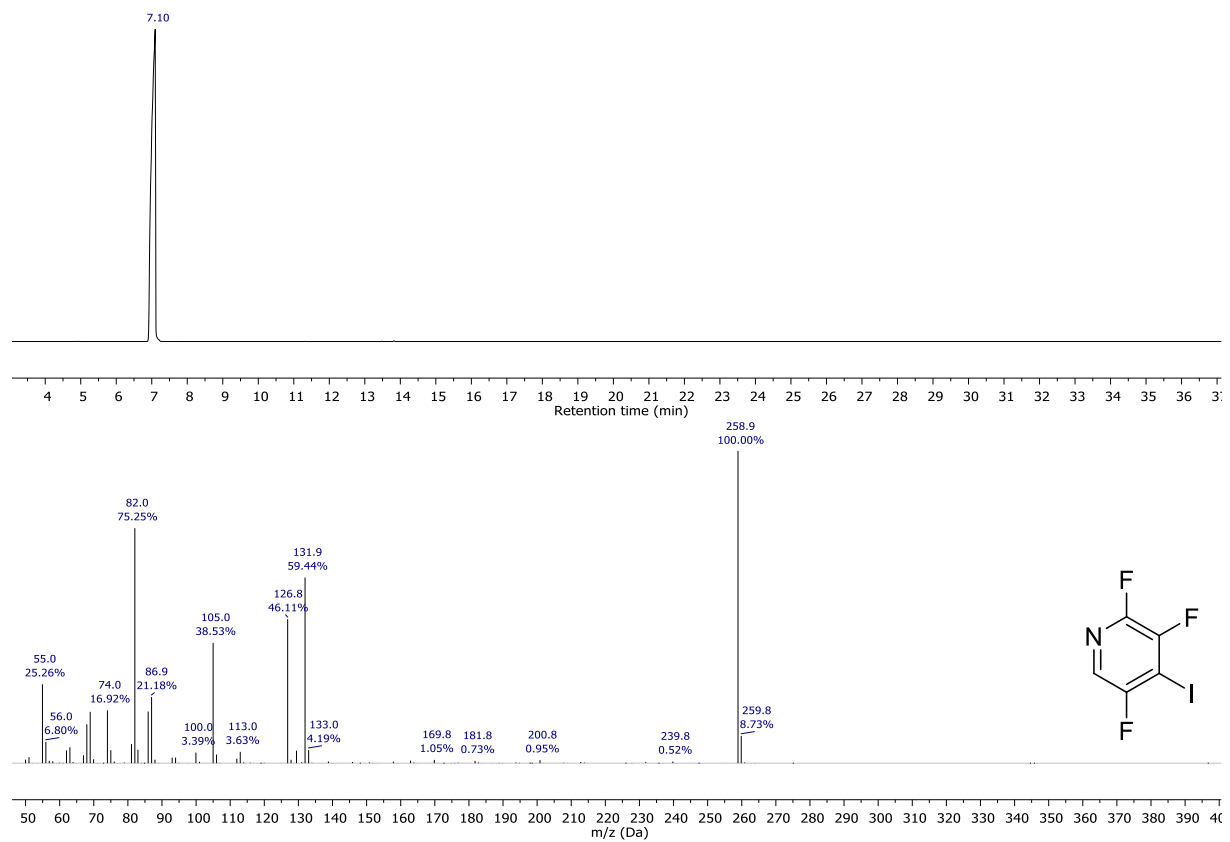Figure S141 GC/MS-Spectrum with EI-Spectrum (EI $^+$ ): 2,3,5-Trifluoro-4-iodopyridine

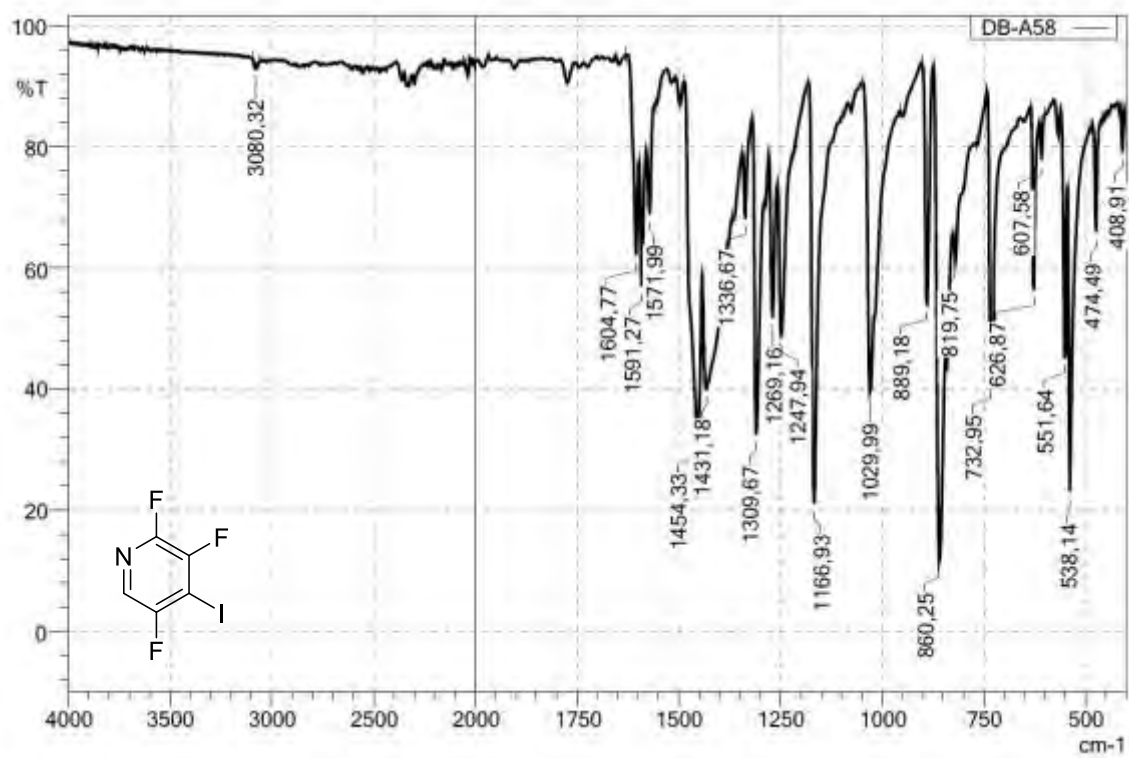

Figure S142 IR (ATR)-Spectrum: 2,3,5-Trifluoro-4-iodopyridine



## 2,3,5,6-Tetrafluoro-4-iodopyridine (42)

 $^{19}\text{F}$  NMR (235 MHz, Chloroform- $d$ )  $\delta$  -89.38 (dq,  $J$  = 28.0, 12.9 Hz), -122.33 – -123.18 (m).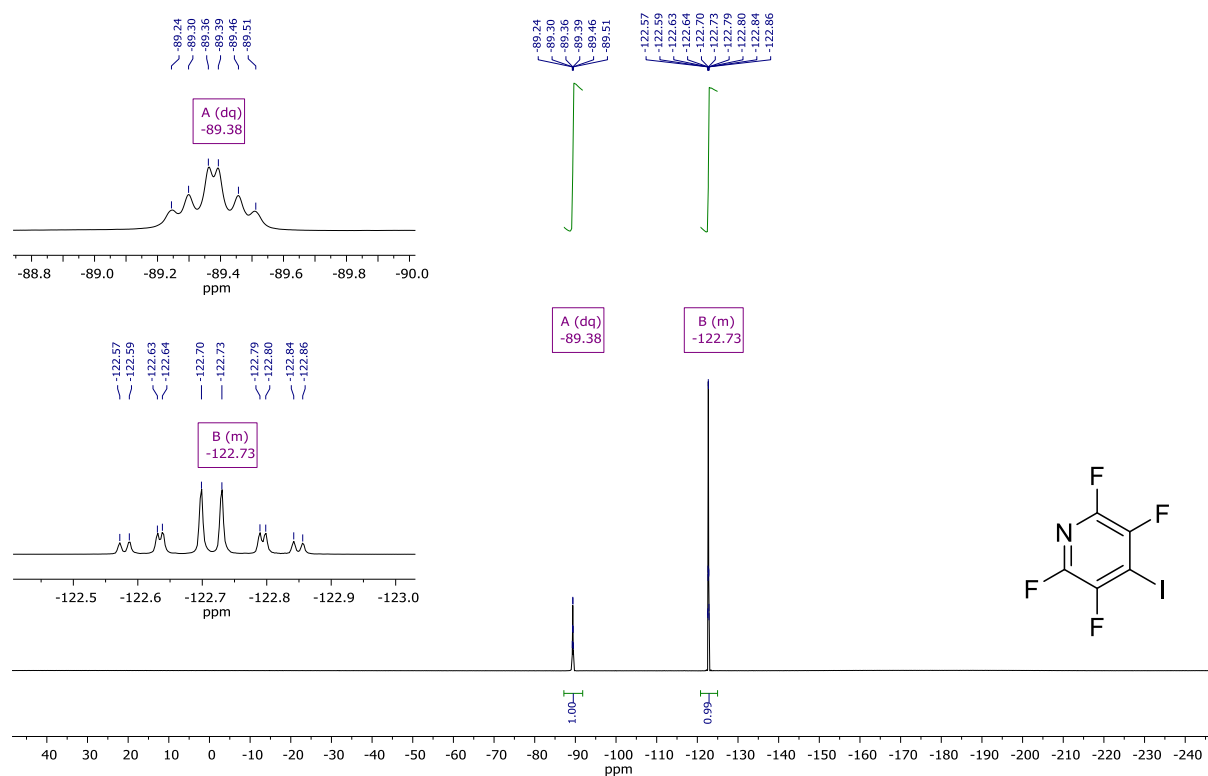Figure S143  $^{19}\text{F}$ -NMR [ $^1\text{H}$ ]: 2,3,5,6-Tetrafluoro-4-iodopyridine $^{13}\text{C}$  NMR (63 MHz, Chloroform- $d$ )  $\delta$  145.98 – 141.01 (m), 145.05 – 140.23 (m), 88.64 (t, 2.3 Hz).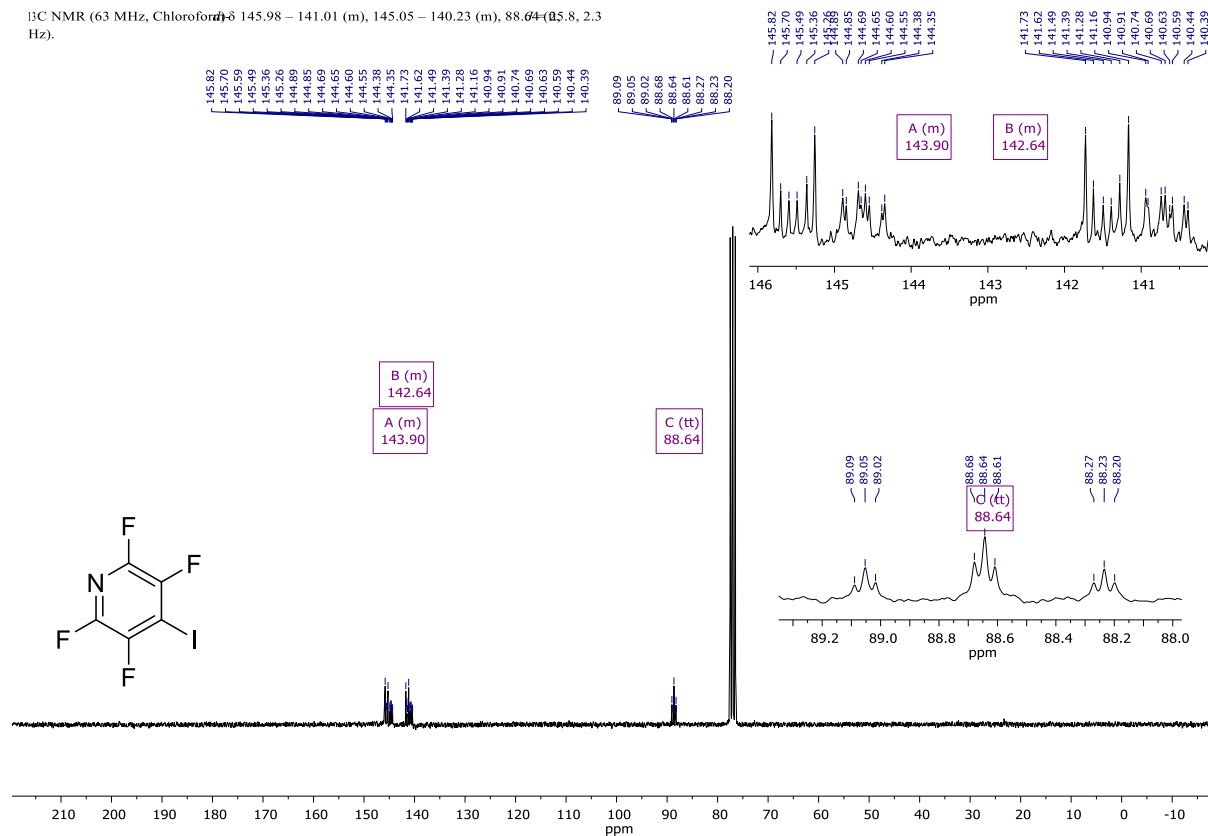Figure S144  $^{13}\text{C}$  NMR: 2,3,5,6-Tetrafluoro-4-iodopyridine

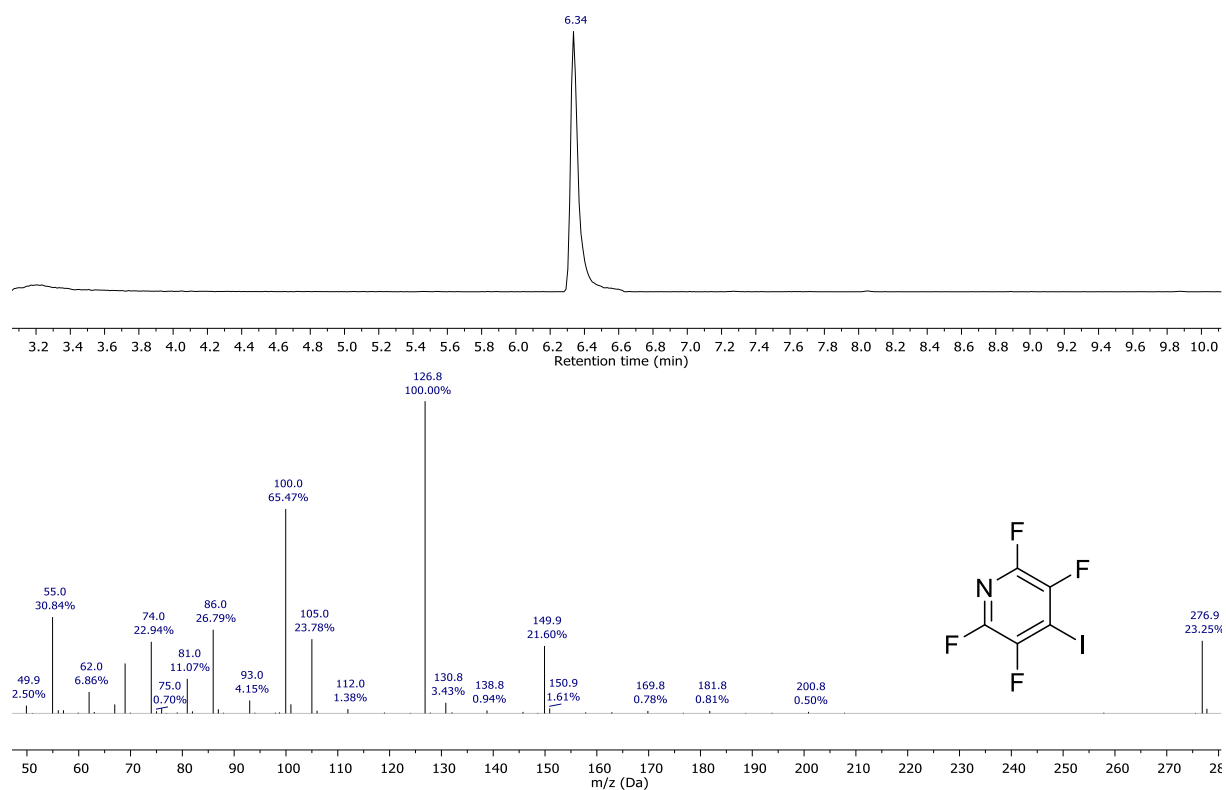Figure S145 GC/MS-Spectrum with EI-Spectrum (EI<sup>+</sup>): 2,3,5,6-Tetrafluoro-4-iodopyridine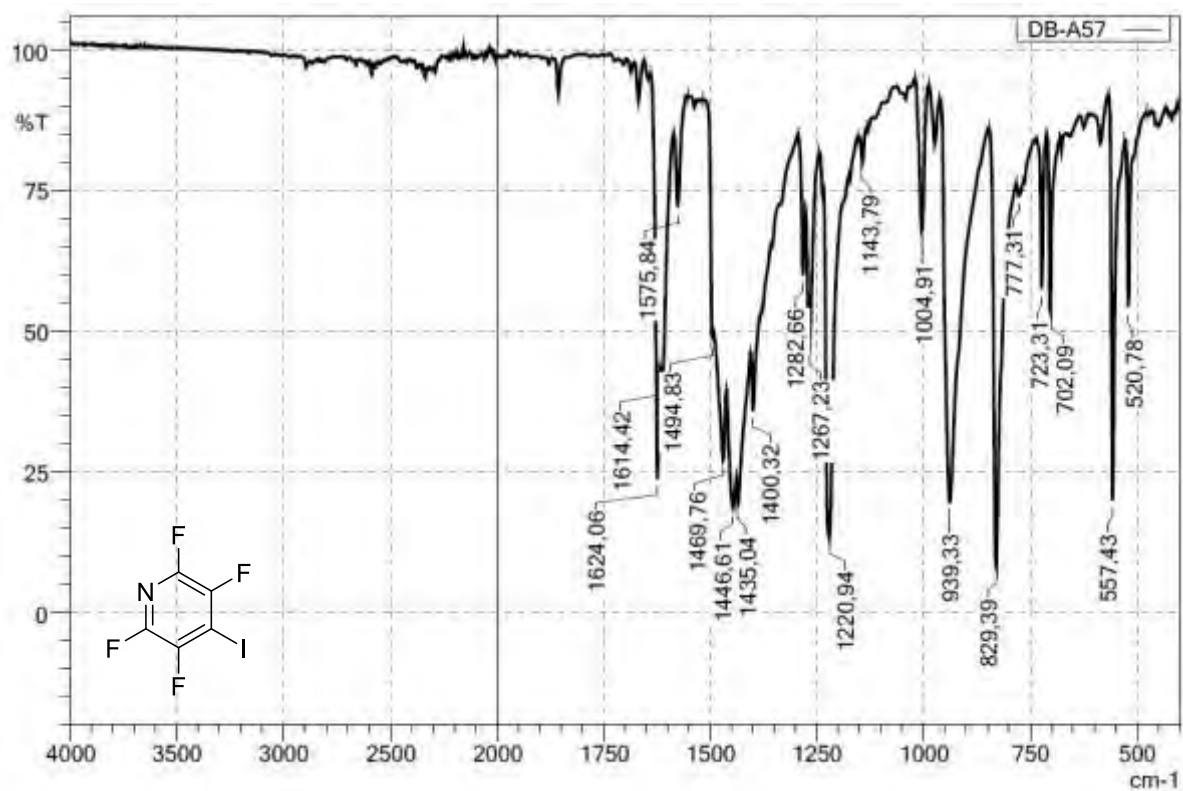

Figure S146 IR (ATR)-Spectrum: 2,3,5,6-Tetrafluoro-4-iodopyridine



$^{13}\text{C}$  NMR (63 MHz, Acetone- $d_6$ )  $\delta$  162.55 (dd,  $J = 244.7, 9.5$  Hz), 151.84 (dt,  $J = 251.6, 14.2$  Hz), 147.02 (dd,  $J = 243.4, 10.5$  Hz), 123.40 (dd,  $J = 17.4, 10.8$  Hz), 121.14 – 114.58 (m), 105.62 (dd,  $J = 32.1, 20.3$  Hz).

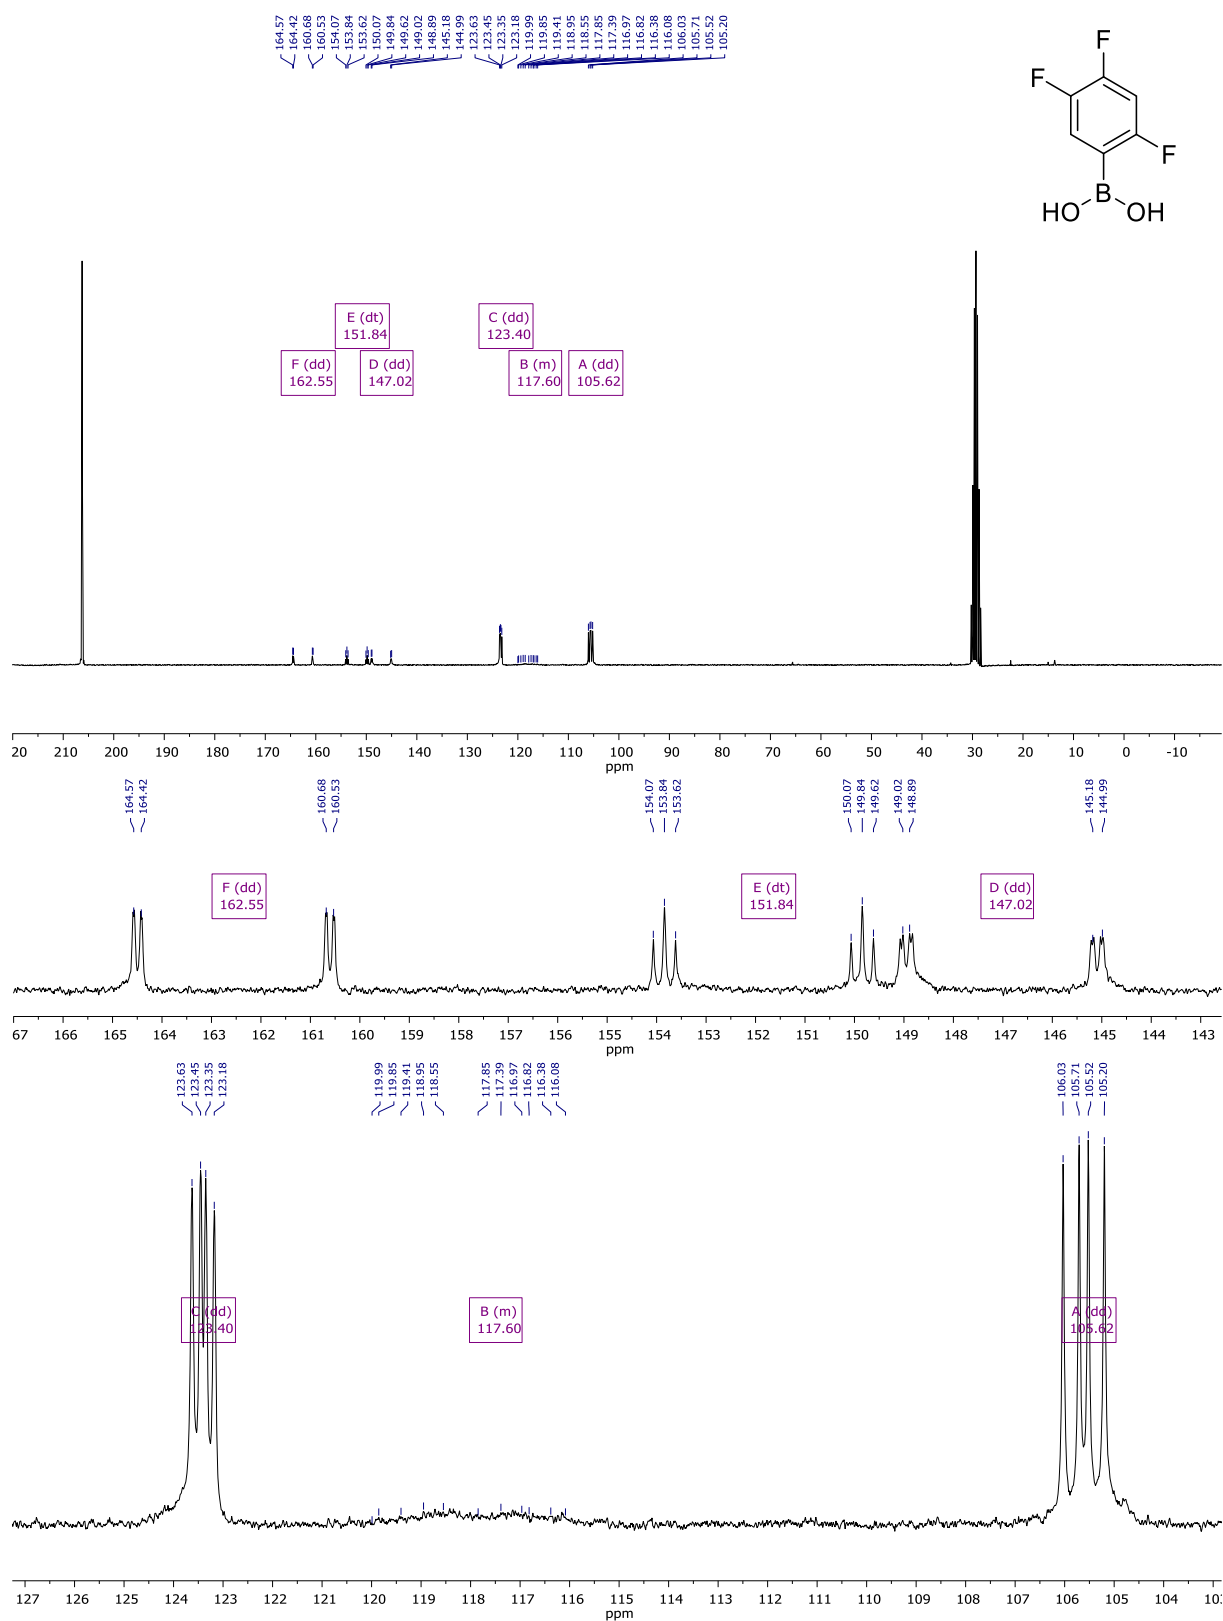

Figure S149  $^{13}\text{C}$  NMR: (2,4,5-Trifluorophenyl)boronic acid

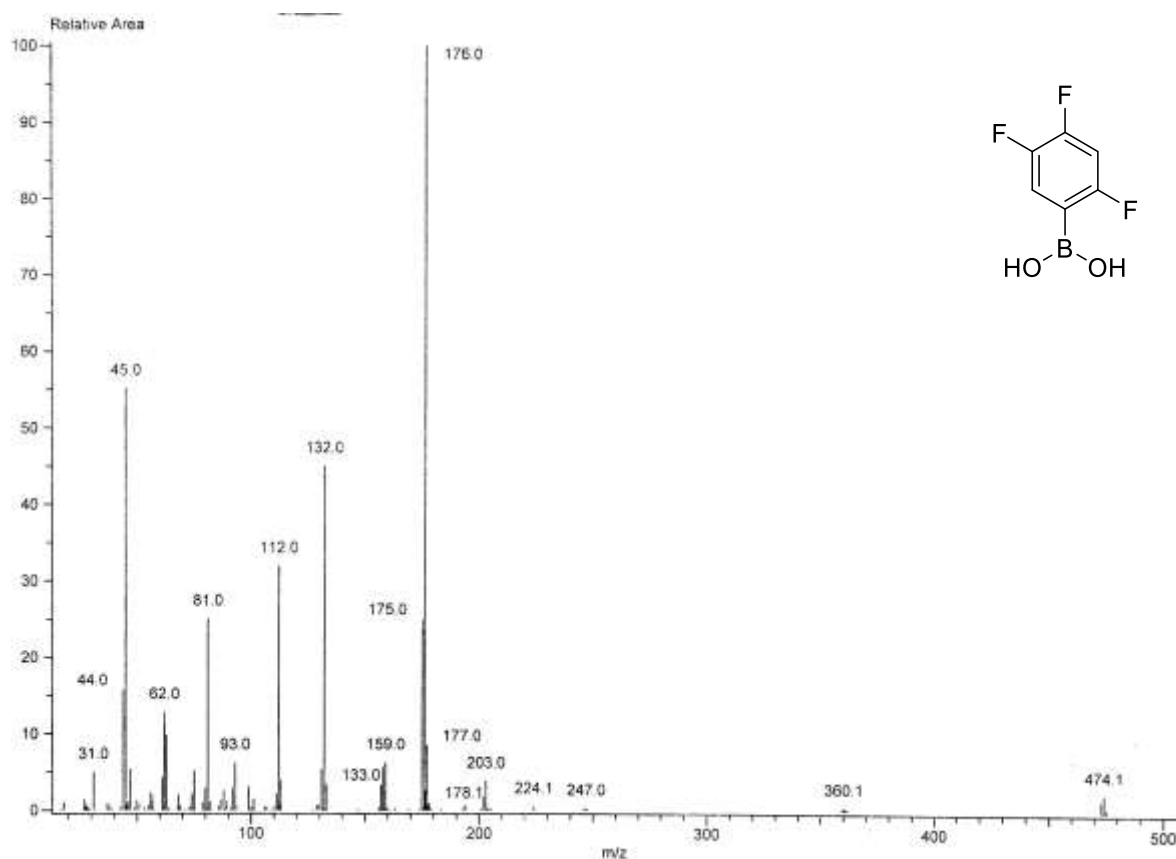

Figure S150 EI-Spectrum (EI<sup>+</sup>): (2,4,5-Trifluorophenyl)boronic acid

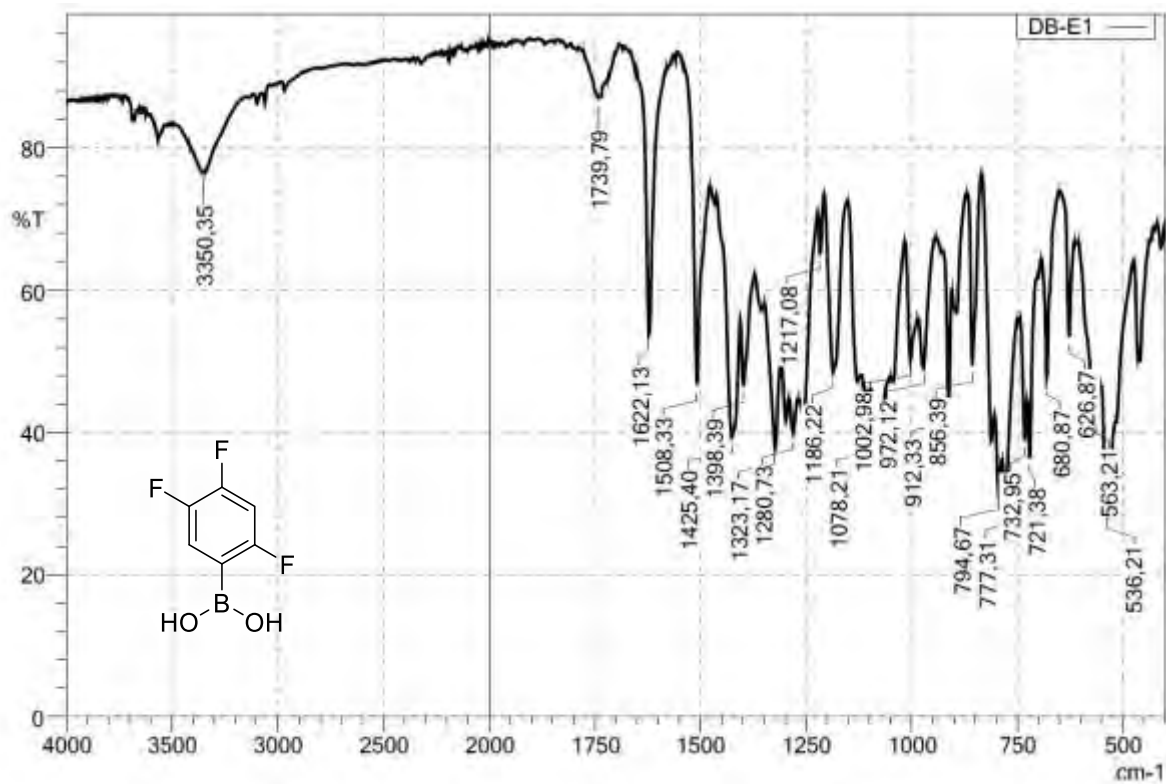

Figure S151 IR (ATR)-Spectrum: (2,4,5-Trifluorophenyl)boronic acid



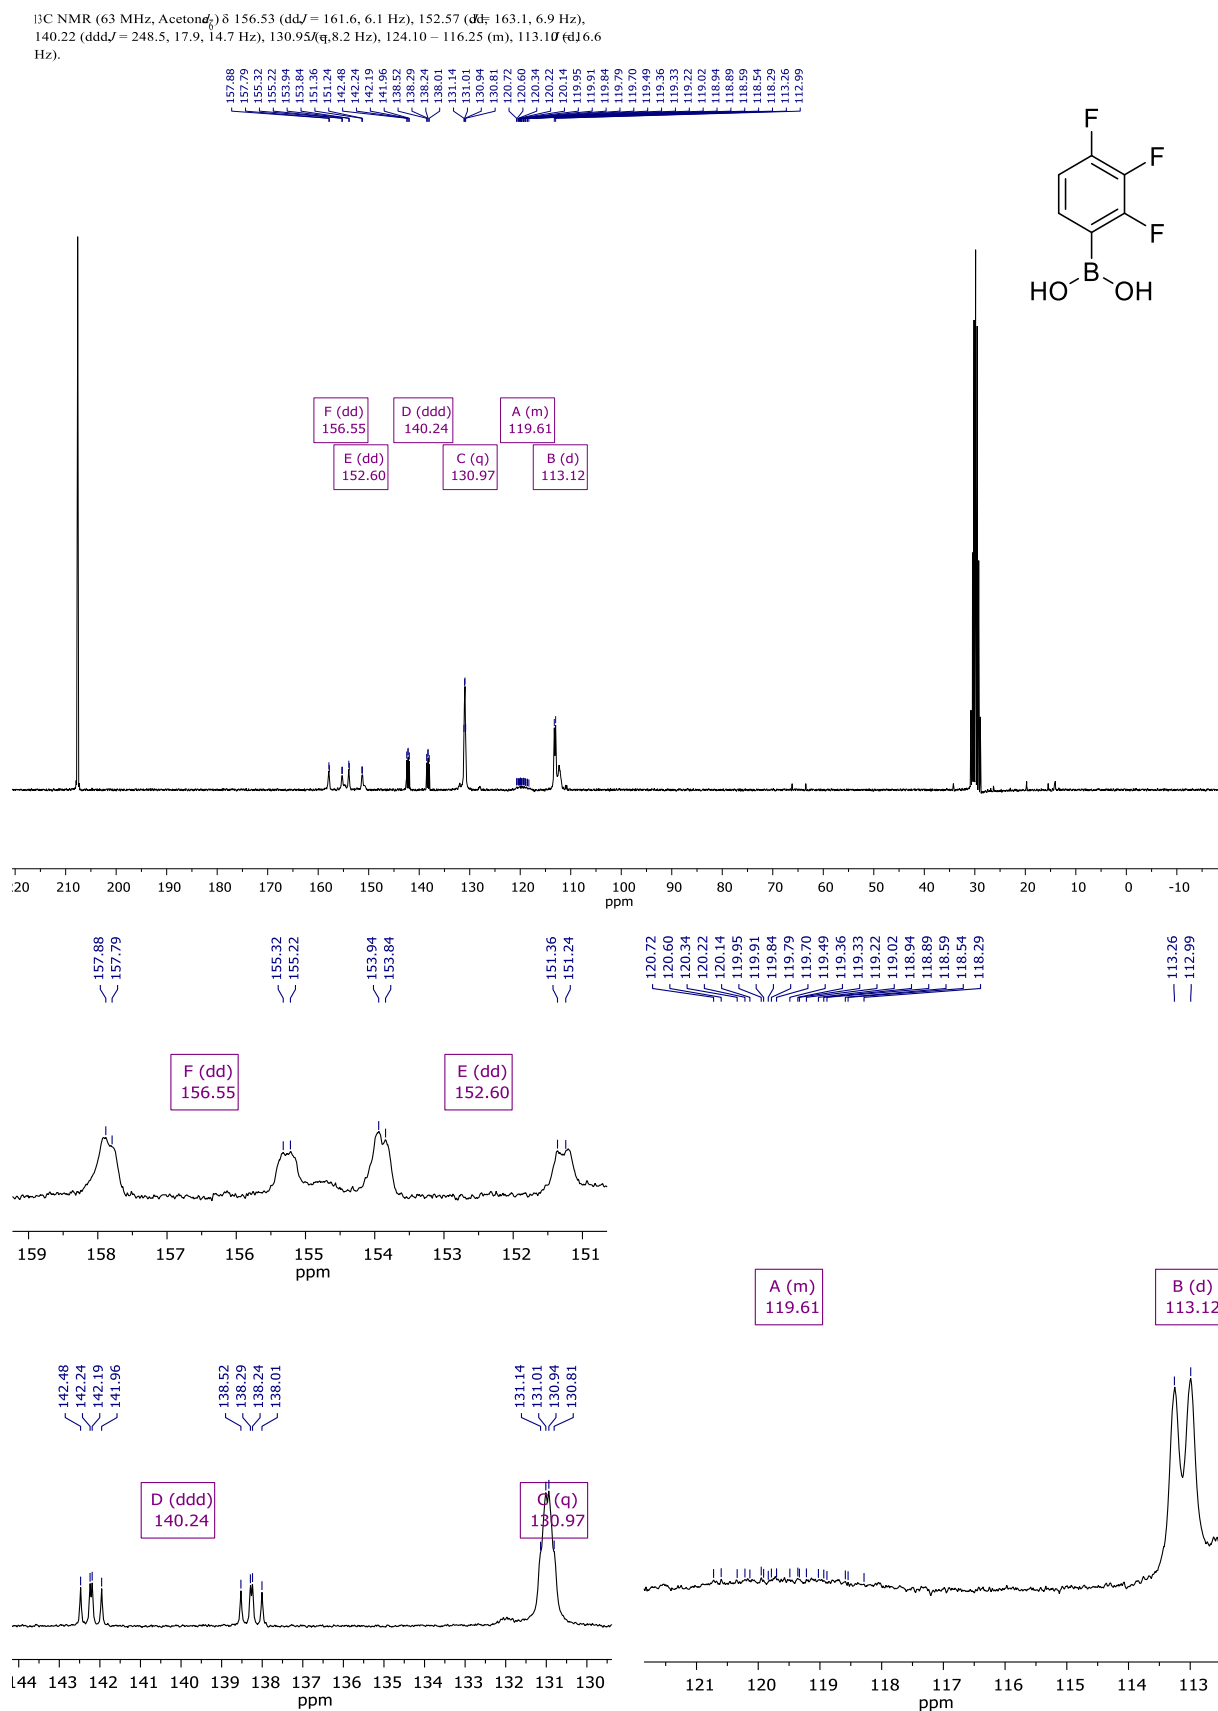Figure S154  $^{13}\text{C}$  NMR: (2,3,4-Trifluorophenyl)boronic acid

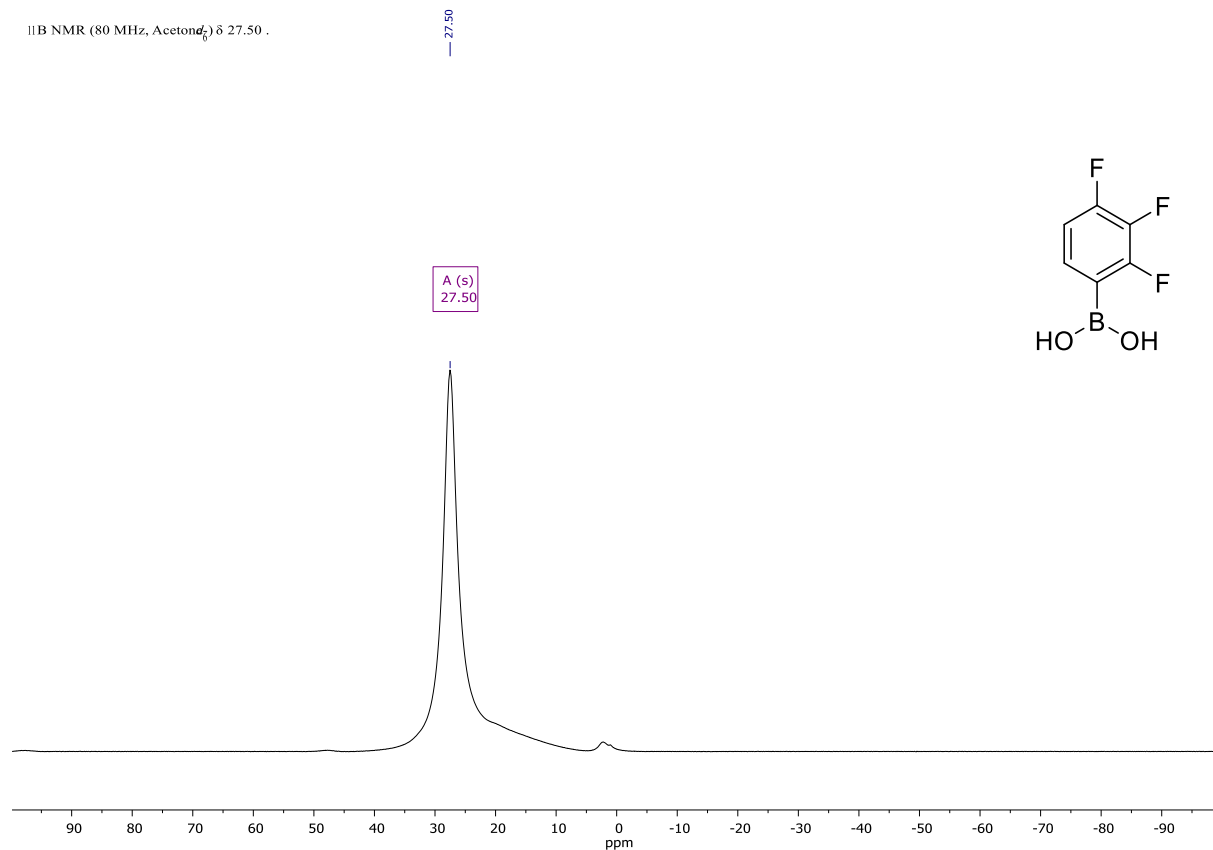Figure S155  $^{11}\text{B}$ -NMR: (2,3,4-Trifluorophenyl)boronic acid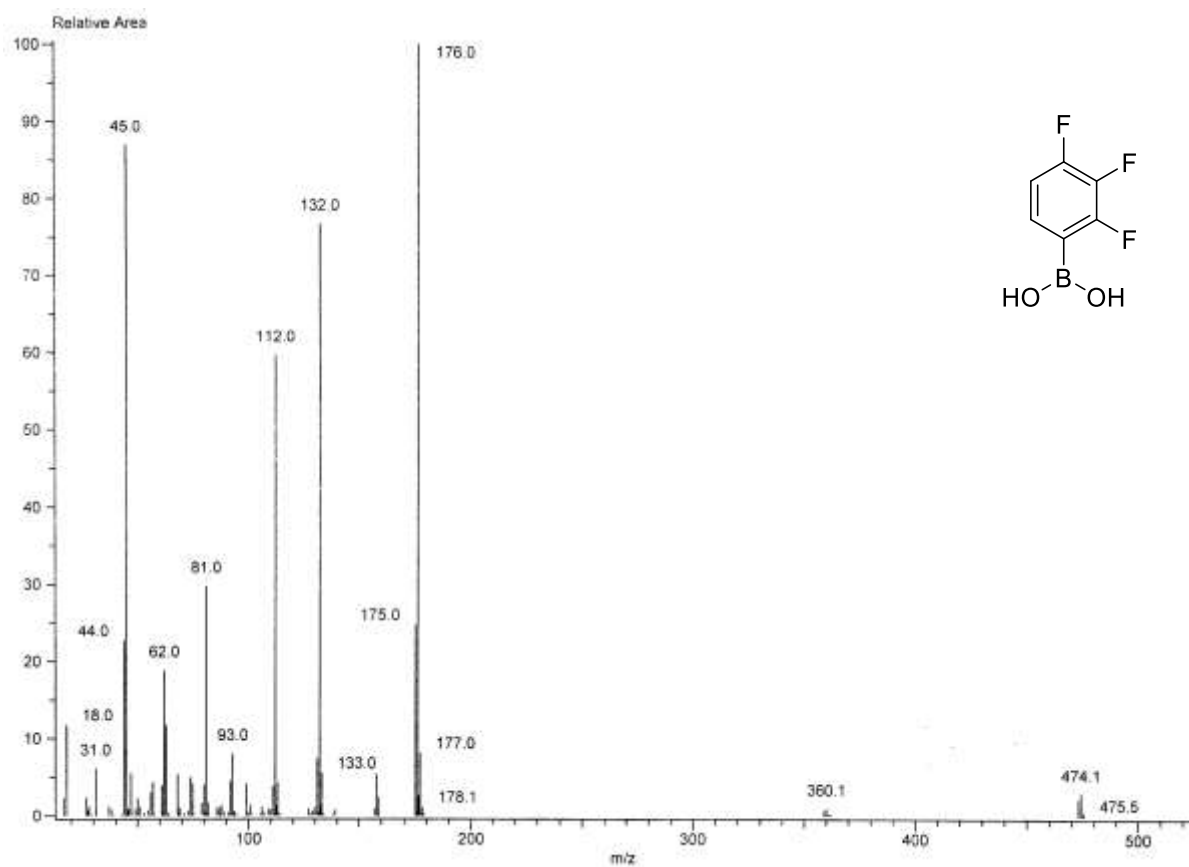Figure S156 EI-Spectrum (EI<sup>+</sup>): (2,3,4-Trifluorophenyl)boronic acid



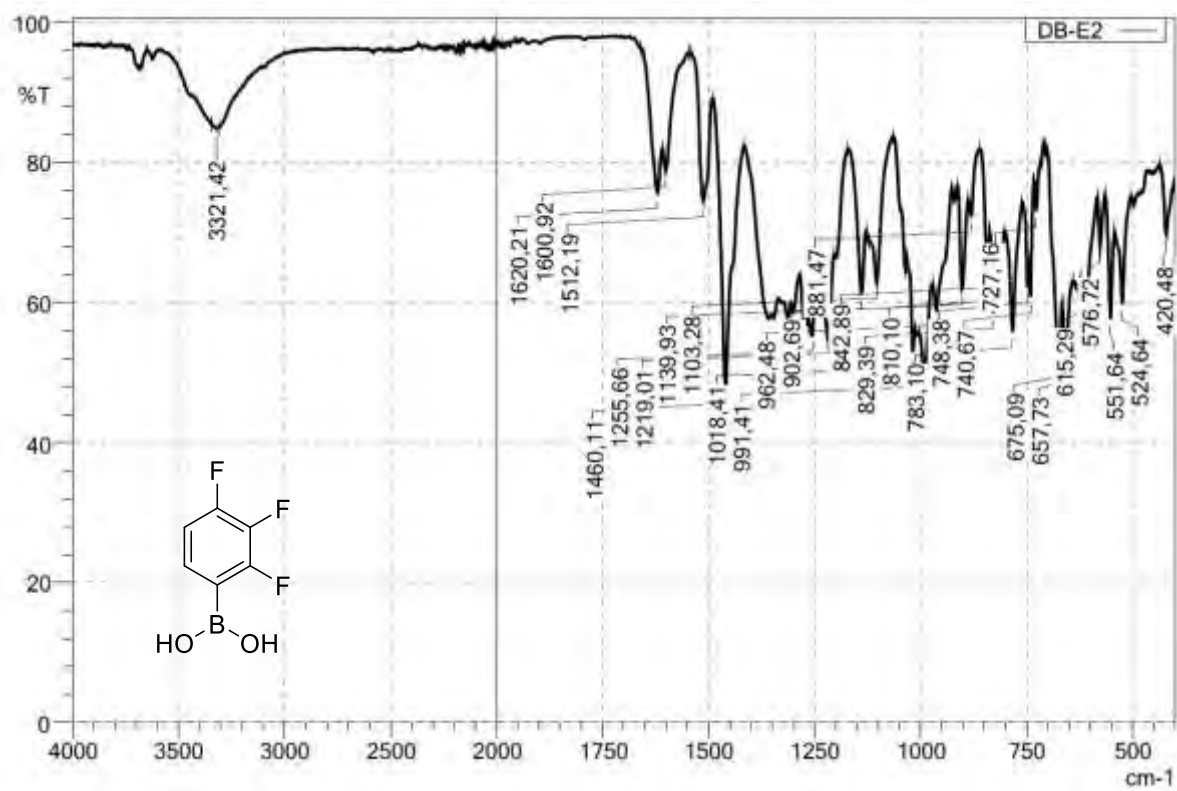

Figure S157 IR (ATR)-Spectrum: (2,3,4-Trifluorophenyl)boronic acid

## Boronic acid esters

## 5,5-Dimethyl-2-(2,3,4-trifluorophenyl)-1,3,2-dioxaborinane (15)

$^1\text{H NMR}$  (250 MHz, Chloroform- $d_3$ )  $\delta$  7.45 (dddd,  $J = 8.7, 6.3, 2.5$  Hz, 0H), 7.29 (s, 0H), 6.95 (dddd,  $J = 9.5, 8.5, 6.4, 1.8$  Hz, 0H), 3.82 (s, 1H), 1.07 (s, 1H).

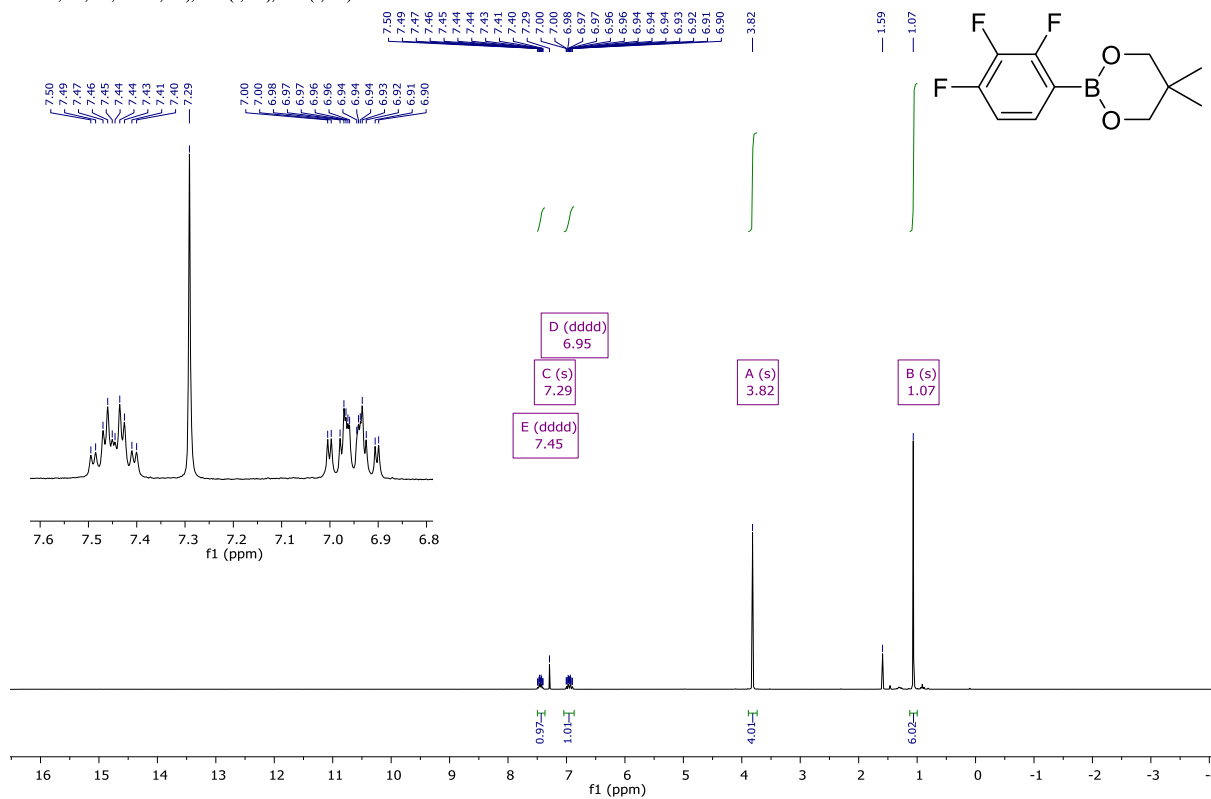Figure S158  $^1\text{H-NMR}$ : 5,5-Dimethyl-2-(2,3,4-trifluorophenyl)-1,3,2-dioxaborinane

$^{19}\text{F NMR}$  (235 MHz, Chloroform- $d_3$ )  $\delta$  -127.11 (dd,  $J = 20.9, 10.5$  Hz), -131.52 (dd,  $J = 19.9, 10.4$  Hz), -162.44 ( $J = 20.4$  Hz).

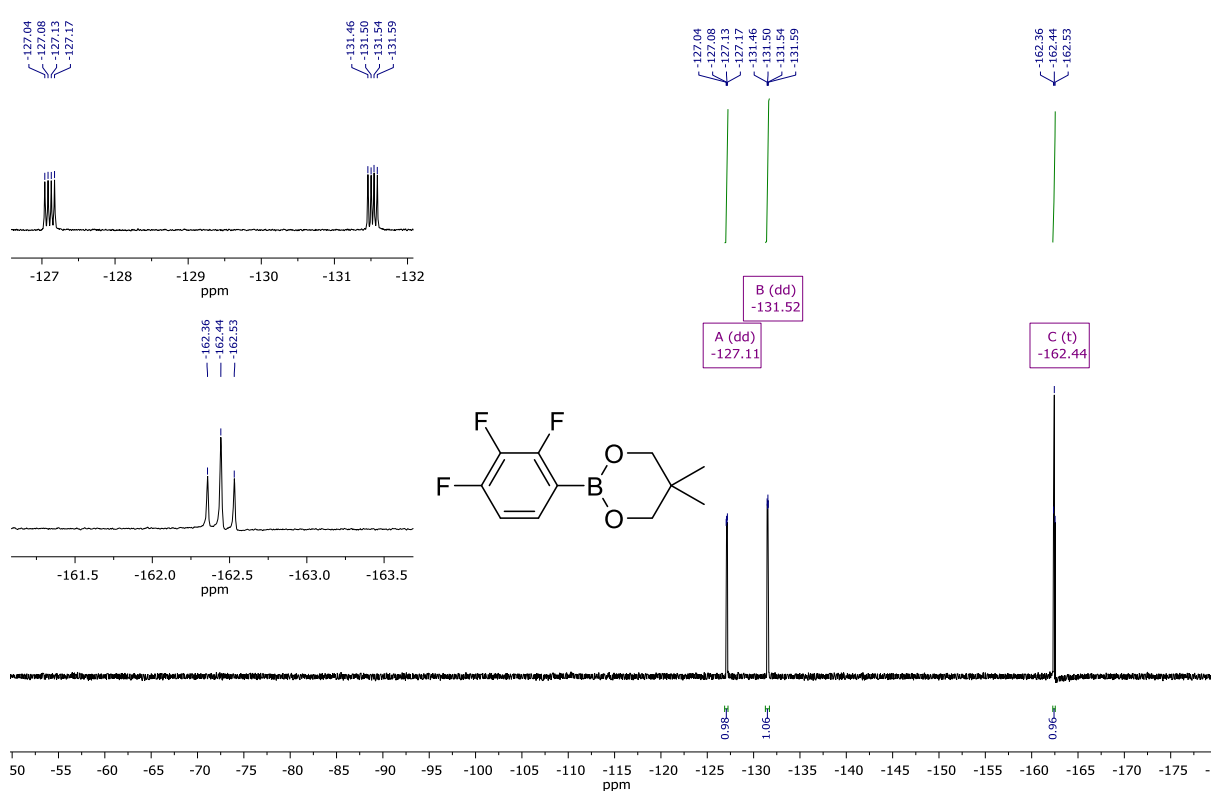Figure S159  $^{19}\text{F-NMR}$  { $^1\text{H}$ }: 5,5-Dimethyl-2-(2,3,4-trifluorophenyl)-1,3,2-dioxaborinane

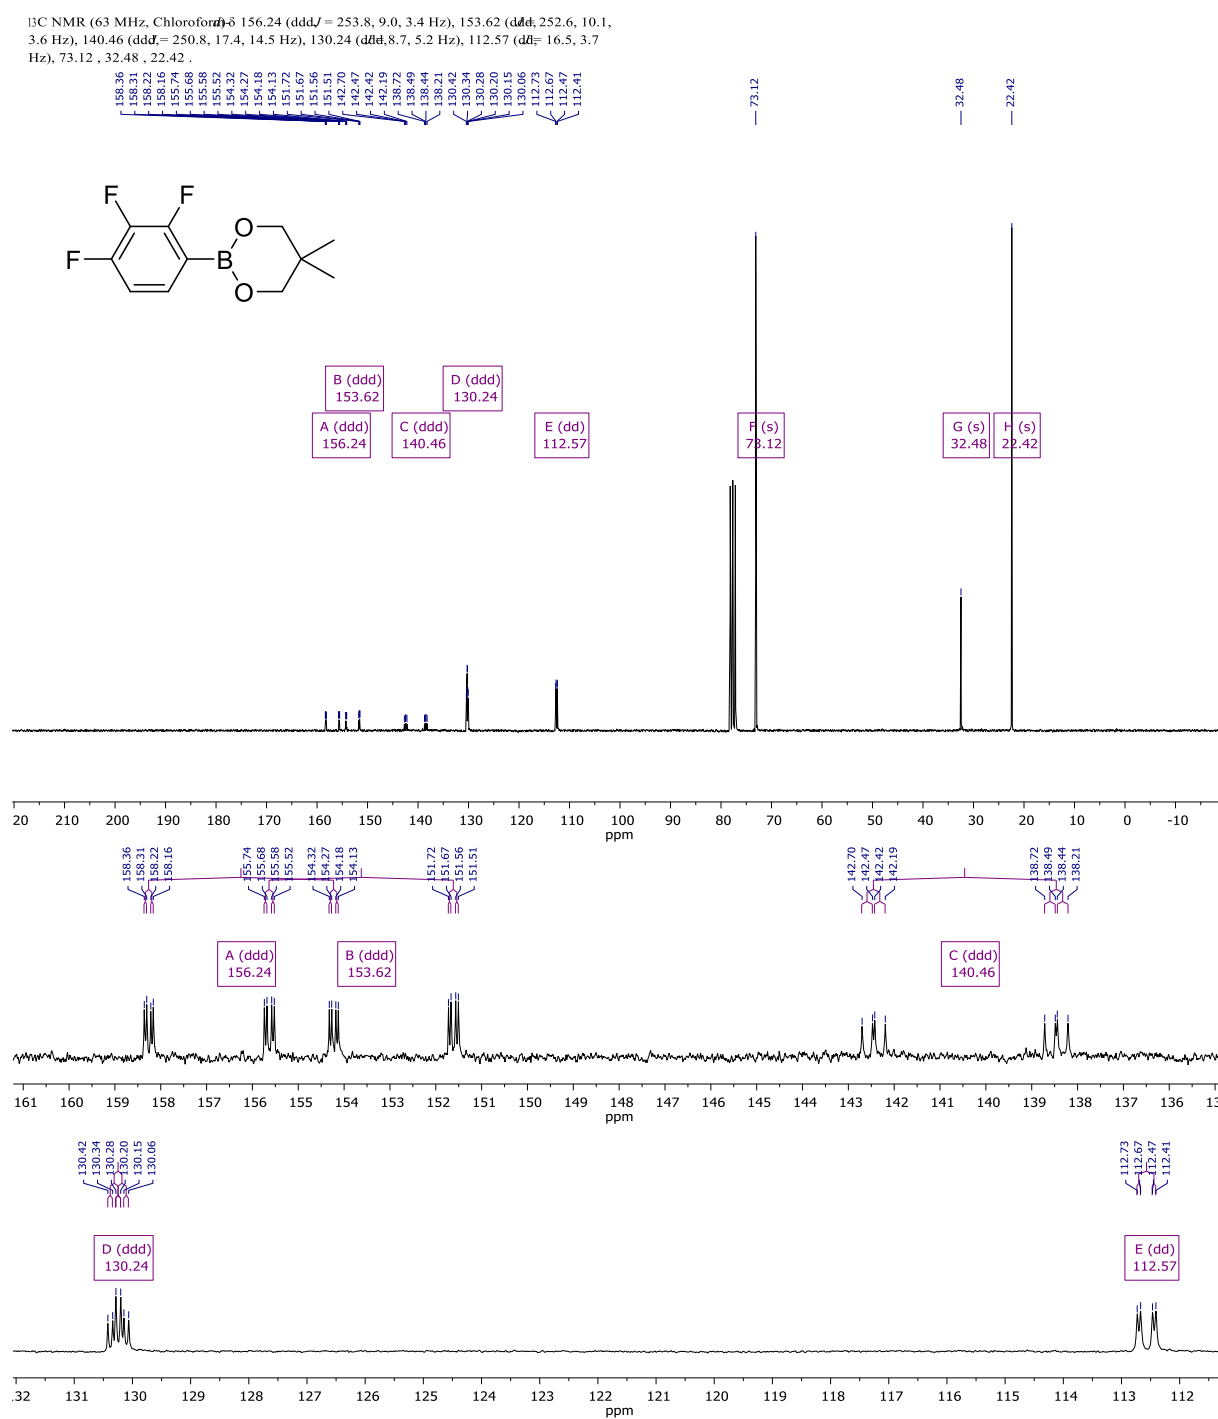Figure S160  $^{13}\text{C}$  NMR: 5,5-Dimethyl-2-(2,3,4-trifluorophenyl)-1,3,2-dioxaborinane

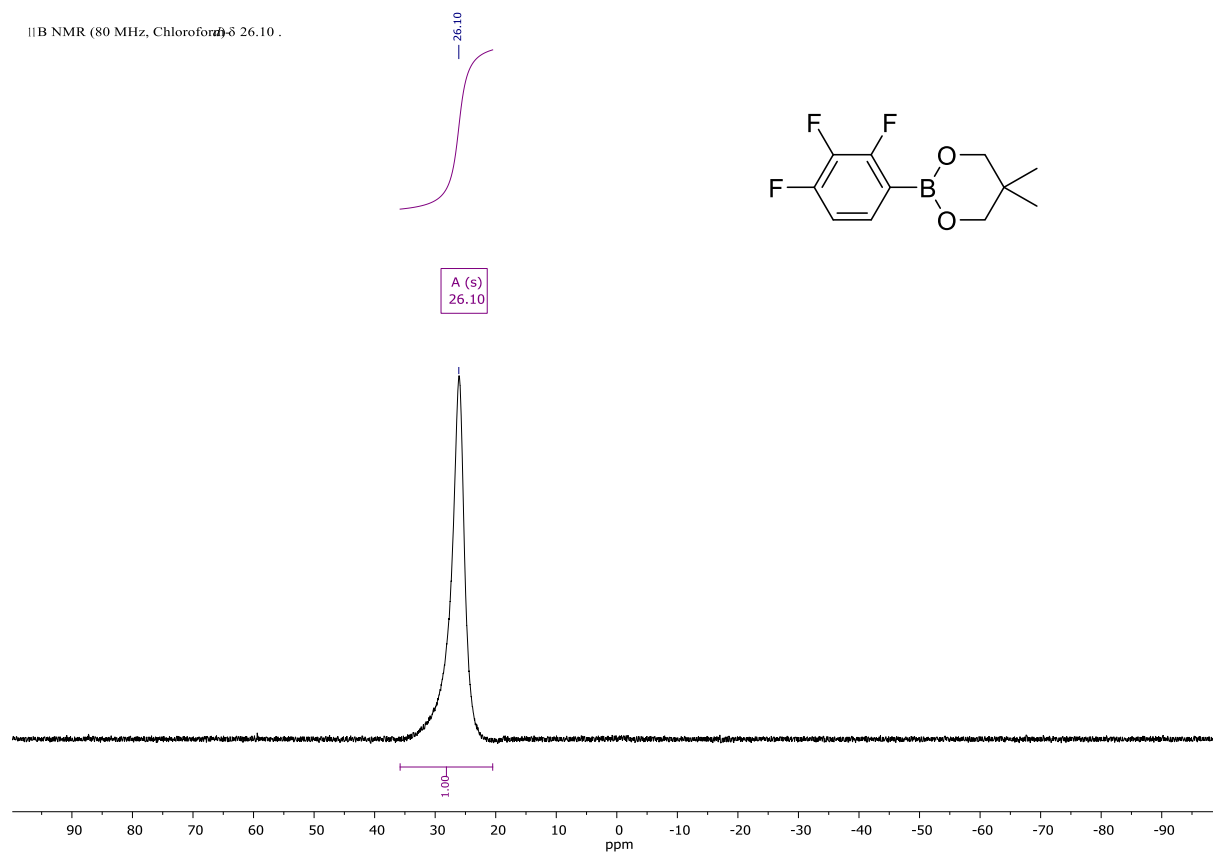Figure S161  $^{11}\text{B}$ -NMR: 5,5-Dimethyl-2-(2,3,4-trifluorophenyl)-1,3,2-dioxaborinane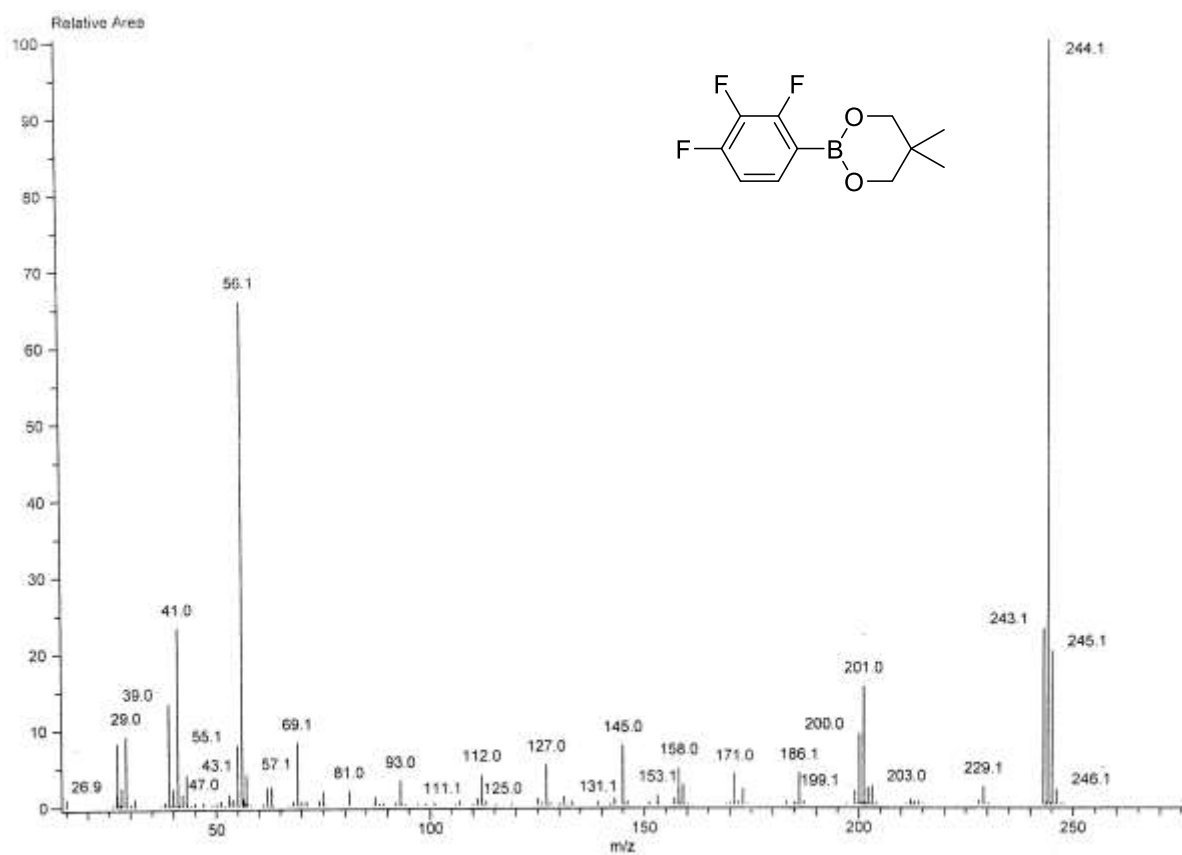Figure S162 EI-Spectrum ( $\text{E}^+$ ): 5,5-Dimethyl-2-(2,3,4-trifluorophenyl)-1,3,2-dioxaborinane

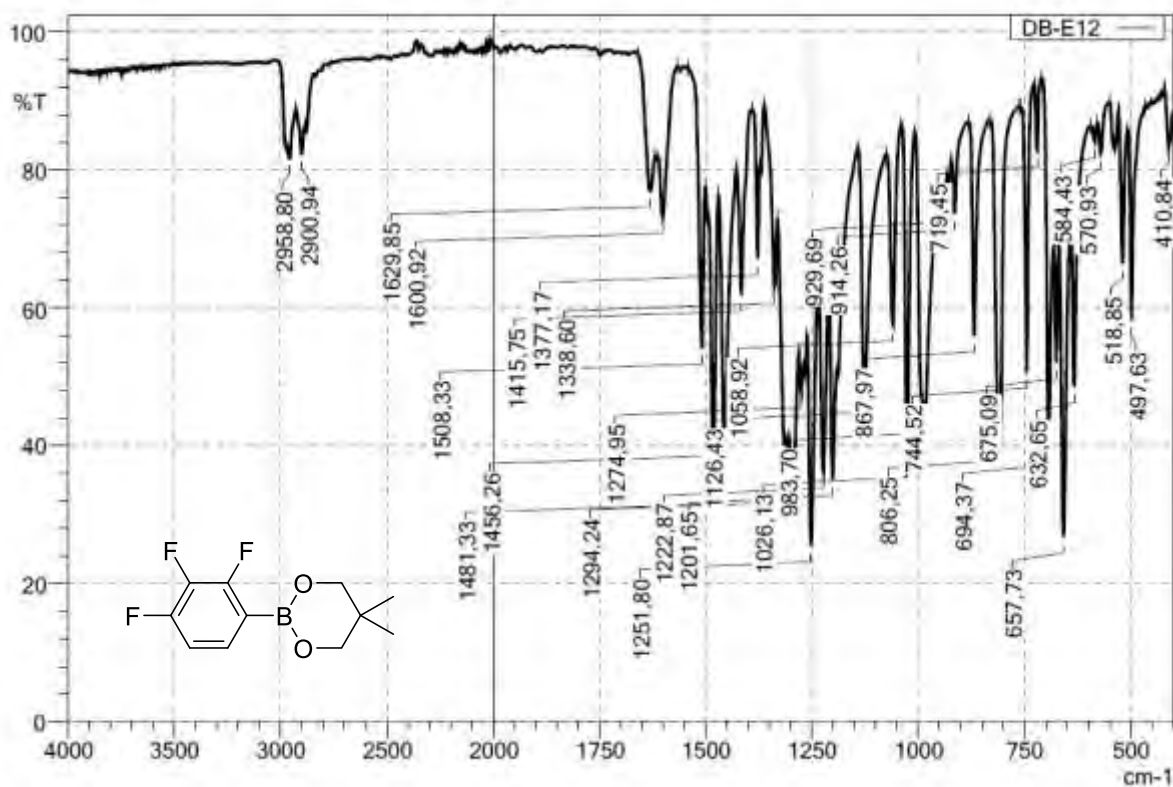

Figure S163 IR (ATR)-Spectrum: 5,5-Dimethyl-2-(2,3,4-trifluorophenyl)-1,3,2-dioxaborinane

## 5,5-Dimethyl-2-(2,4,5-trifluorophenyl)-1,3,2-dioxaborinane (17)

$^1\text{H NMR}$  (250 MHz, Chloroform- $d_3$ )  $\delta$  7.50 (ddd,  $J = 10.7, 9.7, 5.5$  Hz, 1H), 6.85 (ddd, 10.5, 8.7, 6.1 Hz, 1H), 3.78 (s, 4H), 1.03 (s, 6H).

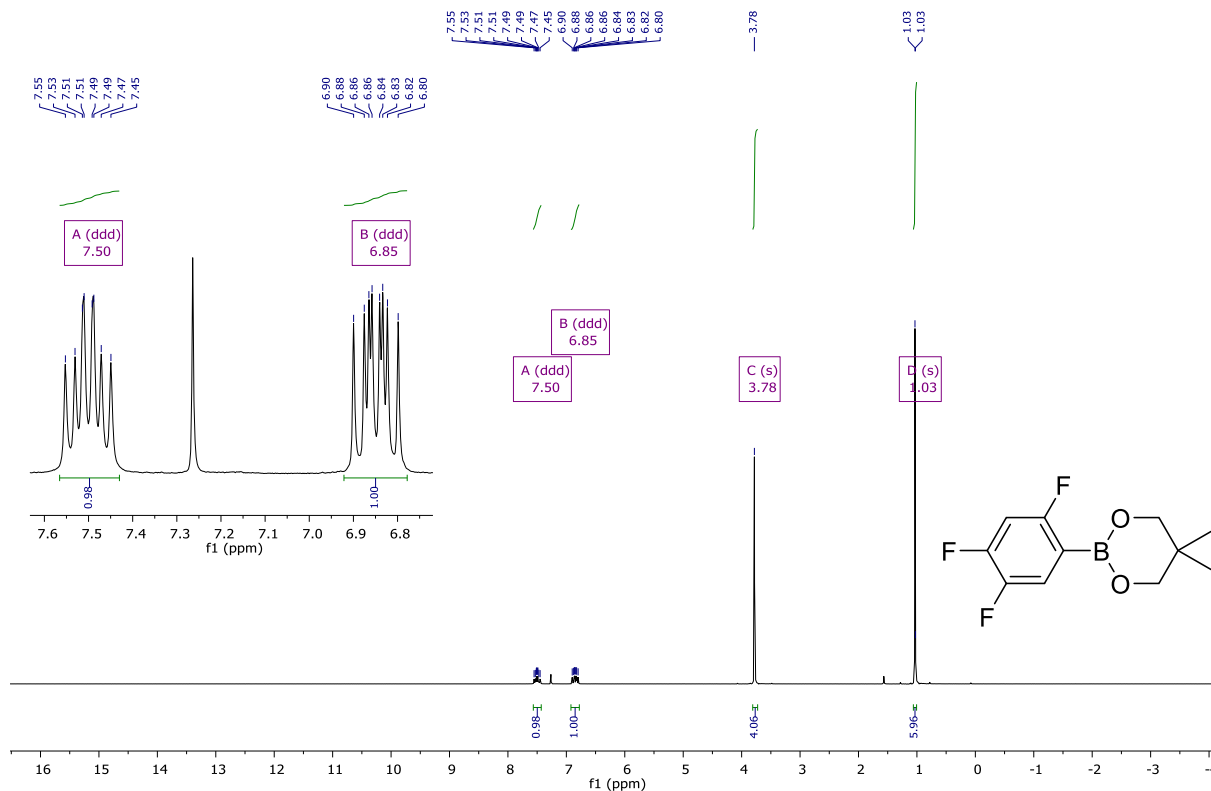Figure S164  $^1\text{H-NMR}$ : 5,5-Dimethyl-2-(2,4,5-trifluorophenyl)-1,3,2-dioxaborinane

$^{19}\text{F NMR}$  (235 MHz, Chloroform- $d_3$ )  $\delta$  -106.19 (ddd,  $J = 16.8, 6.9, 1.6$  Hz), -130.14 (dd, 21.3, 6.9 Hz), -144.71 (dd, 21.3, 16.8 Hz).

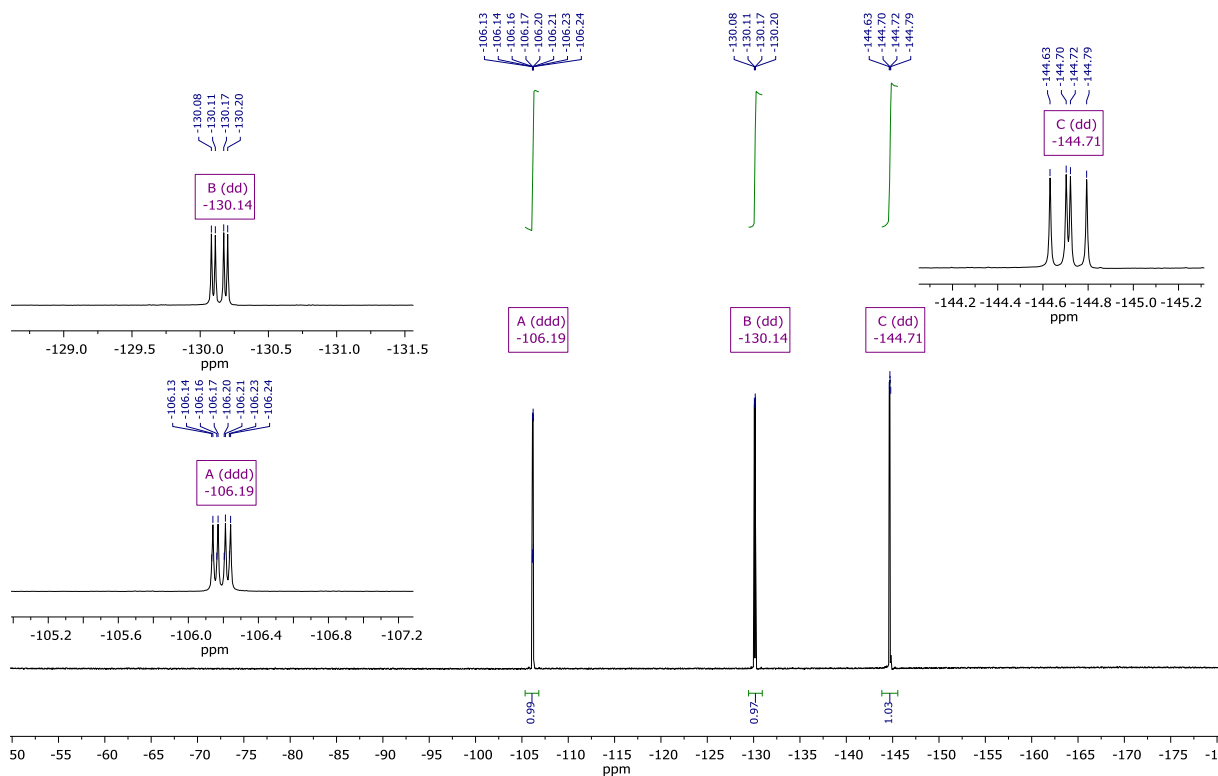Figure S165:  $^{19}\text{F-NMR}$  ( $^1\text{H}$ ): 5,5-Dimethyl-2-(2,4,5-trifluorophenyl)-1,3,2-dioxaborinane

$^{13}\text{C}$  NMR (75 MHz, Chloroform- $d_3$ )  $\delta$  162.52 (ddd,  $J = 249.6, 9.4, 2.1$  Hz), 152.10 (ddd, 254.0, 14.5, 13.2 Hz), 146.88 (ddd,  $J = 244.1, 11.9, 3.6$  Hz), 123.37 (ddd, 17.6, 10.3, 1.9 Hz), 105.61 (dd, 31.1, 19.9 Hz), 72.64, 31.98, 21.95.

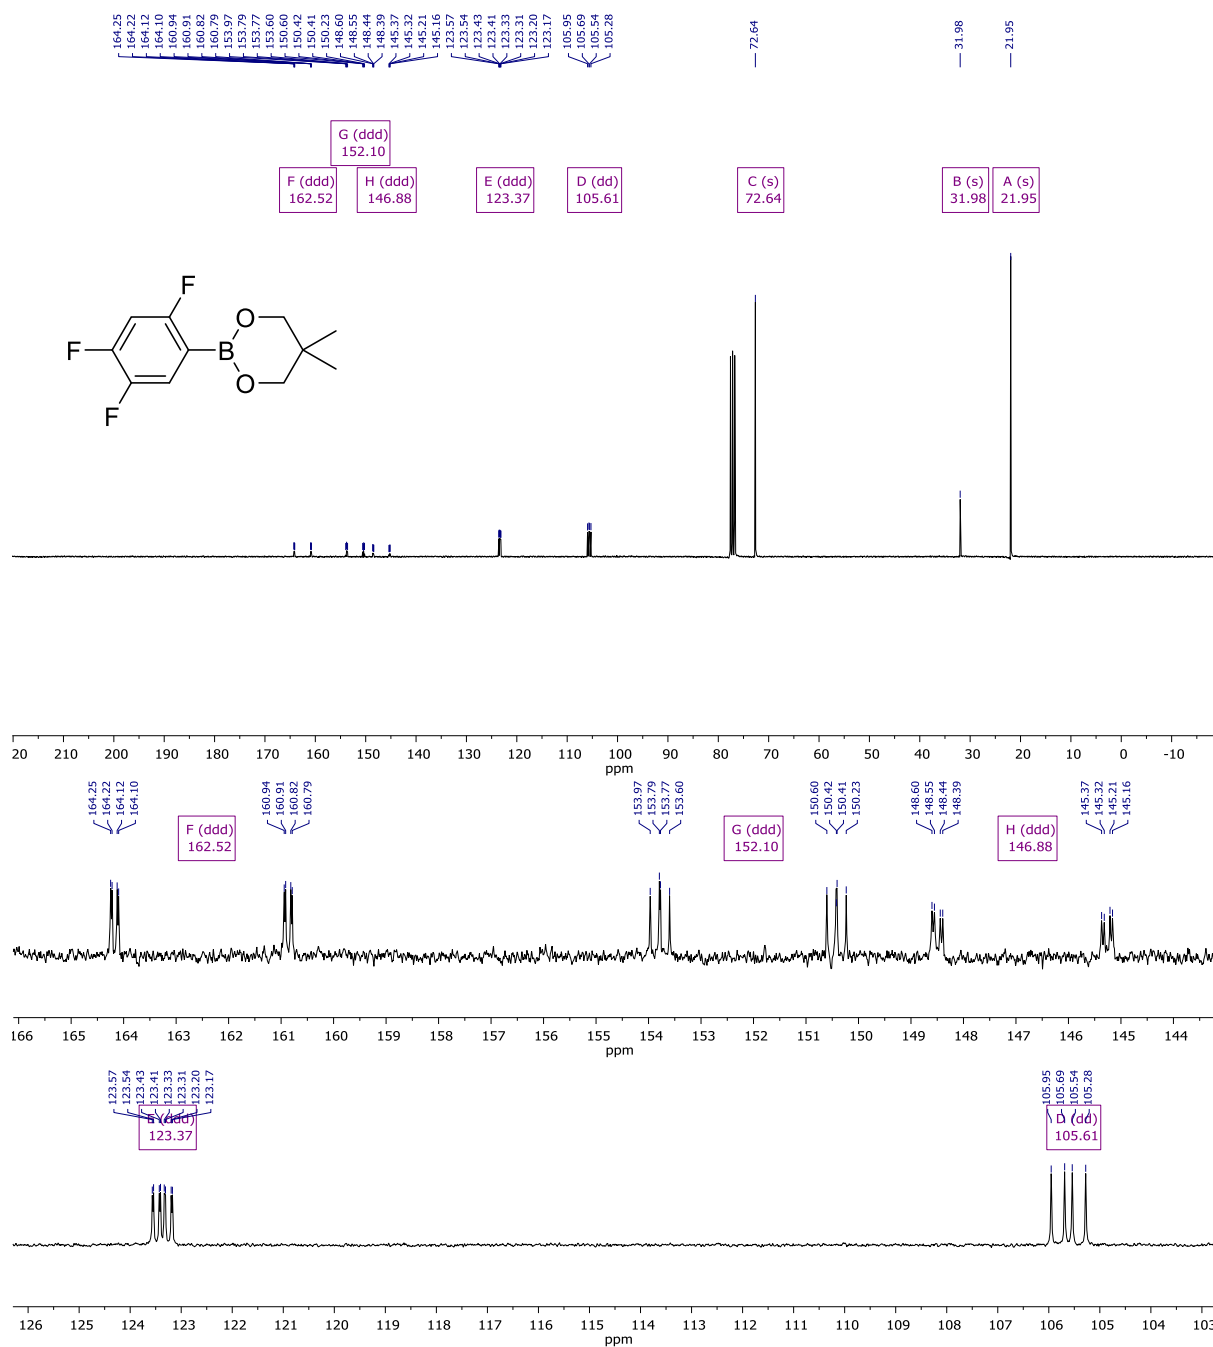

Figure S166  $^{13}\text{C}$  NMR: 5,5-Dimethyl-2-(2,4,5-trifluorophenyl)-1,3,2-dioxaborinane

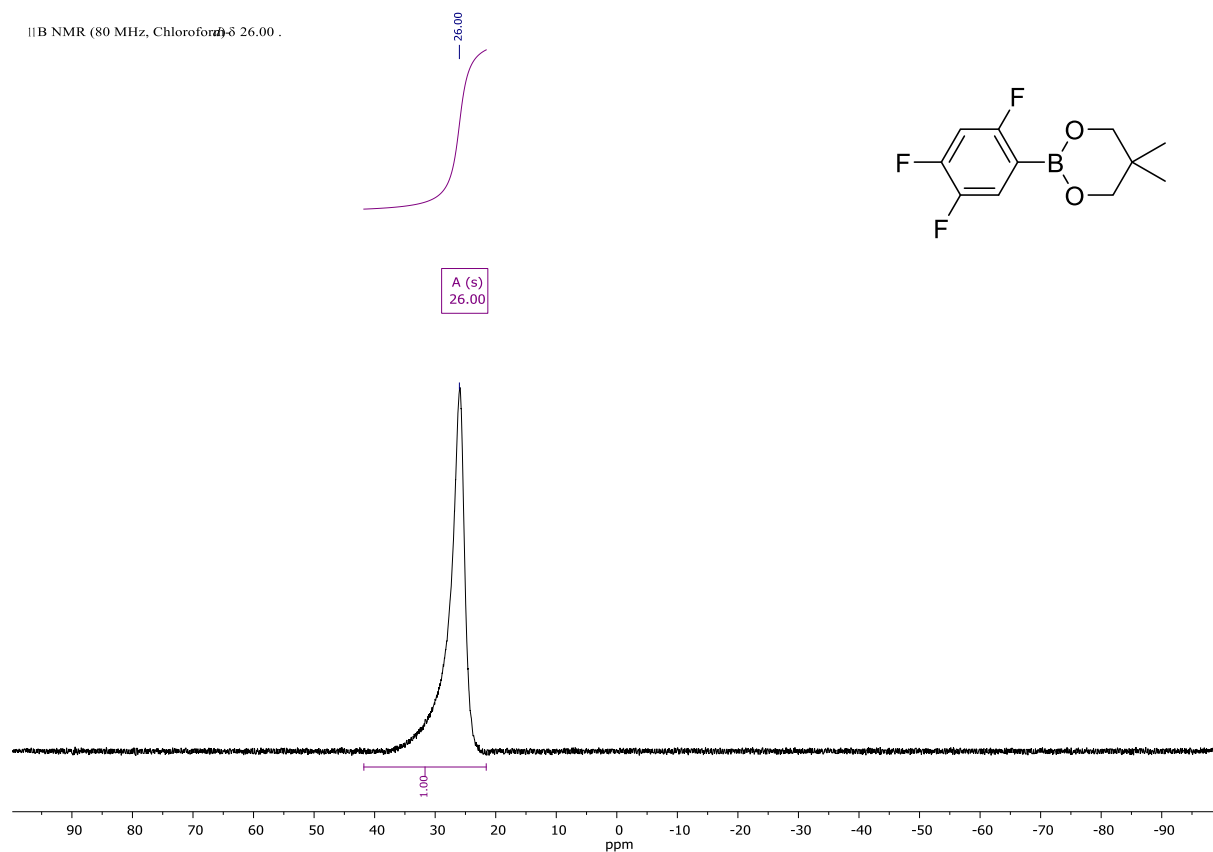

Figure S167  $^{11}\text{B}$ -NMR: 5,5-Dimethyl-2-(2,4,5-trifluorophenyl)-1,3,2-dioxaborinane

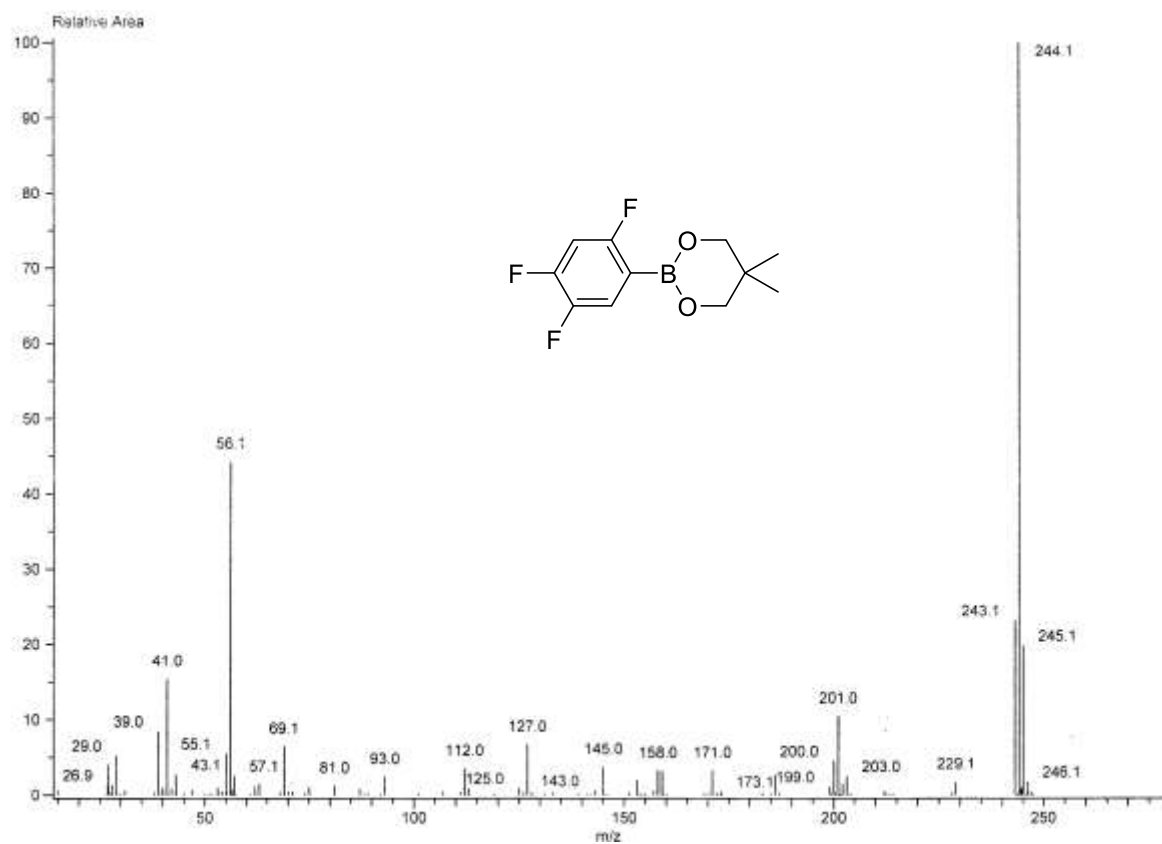

Figure S168 EI-Spectrum ( $\text{E}^+$ ): 5,5-Dimethyl-2-(2,4,5-trifluorophenyl)-1,3,2-dioxaborinane



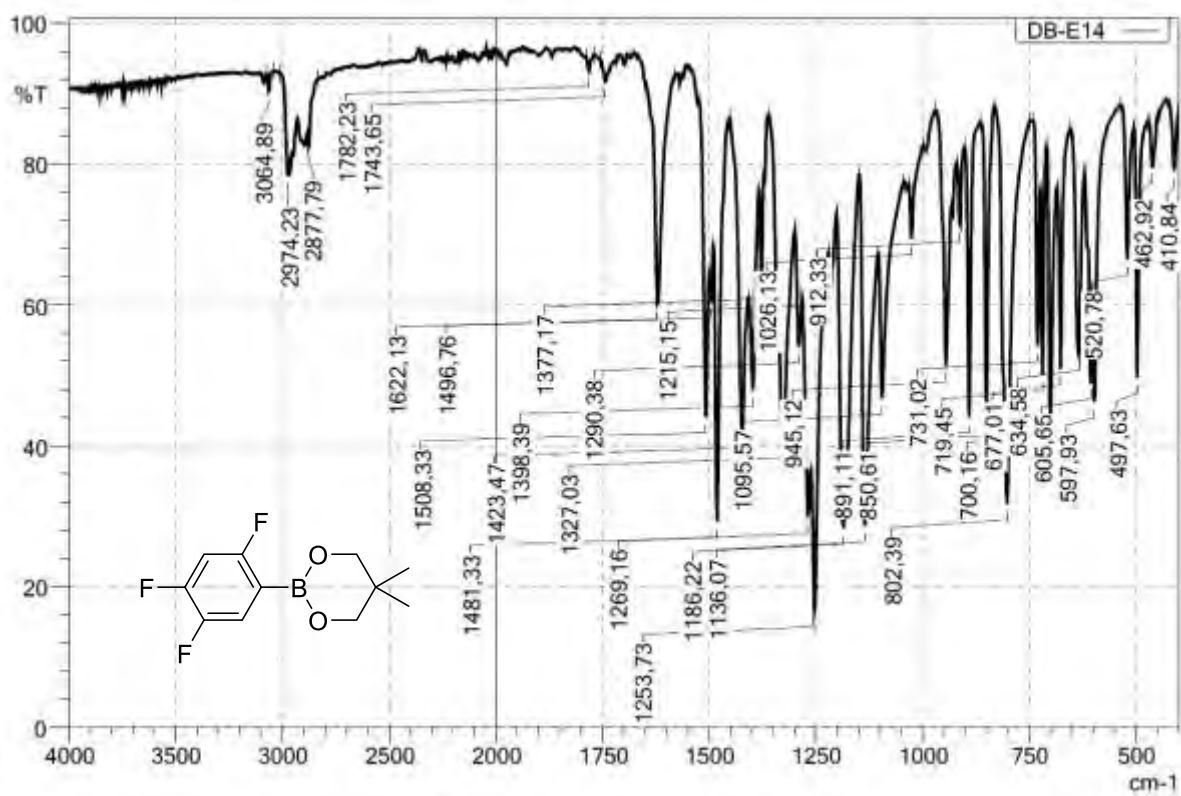

Figure S169 IR (ATR)-Spectrum: 5,5-Dimethyl-2-(2,4,5-trifluorophenyl)-1,3,2-dioxaborinane

## 5,5-Dimethyl-2-(2,3,5,6-tetrafluorophenyl)-1,3,2-dioxaborinane (18)

 $^1\text{H NMR}$  (250 MHz, Chloroform- $d_3$ )  $\delta$  7.04 (tt,  $J = 9.6, 7.4$  Hz, 1H), 3.82 (s, 4H), 1.07 (s, 6H).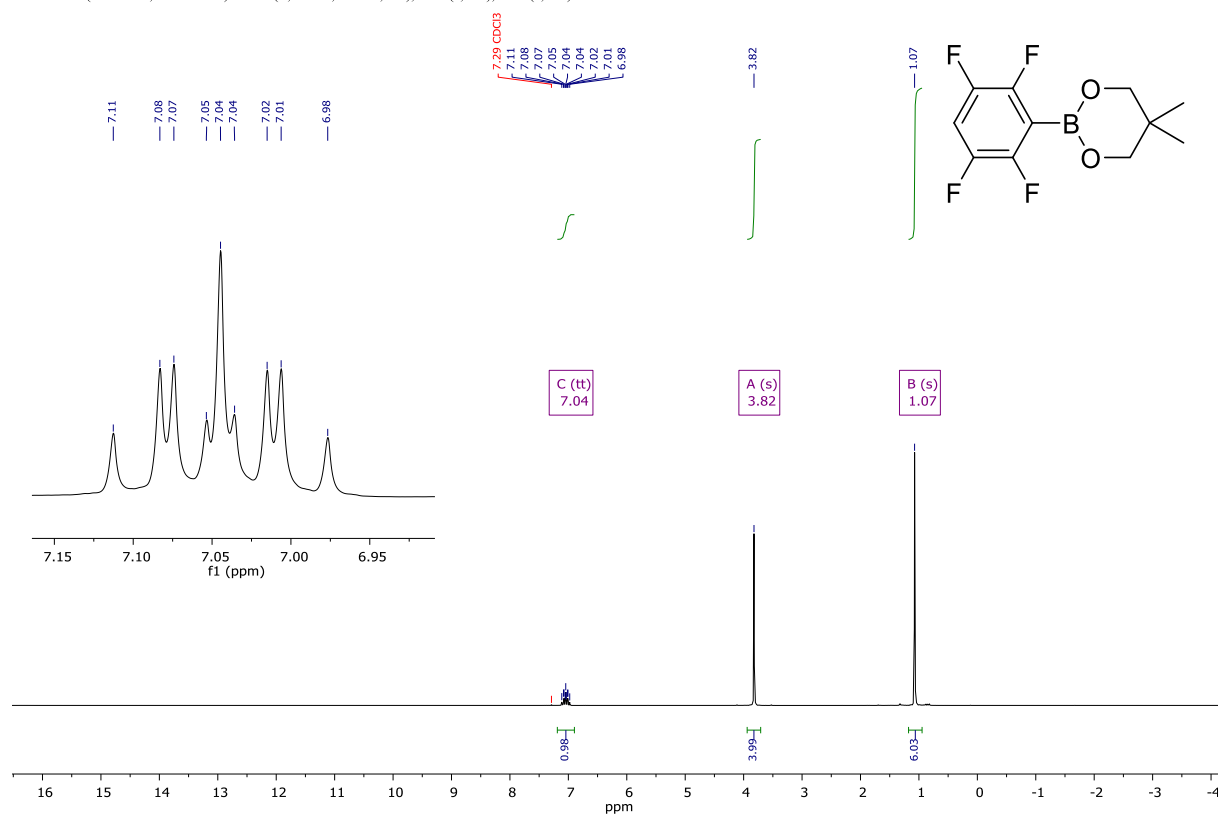Figure S170  $^1\text{H-NMR}$ : 5,5-Dimethyl-2-(2,3,5,6-tetrafluorophenyl)-1,3,2-dioxaborinane $^{19}\text{F NMR}$  (235 MHz, Chloroform- $d_3$ )  $\delta$  -133.33 (dd,  $J = 22.5, 14.7$  Hz), -139.91 (dd,  $J = 22.4, 14.7$  Hz).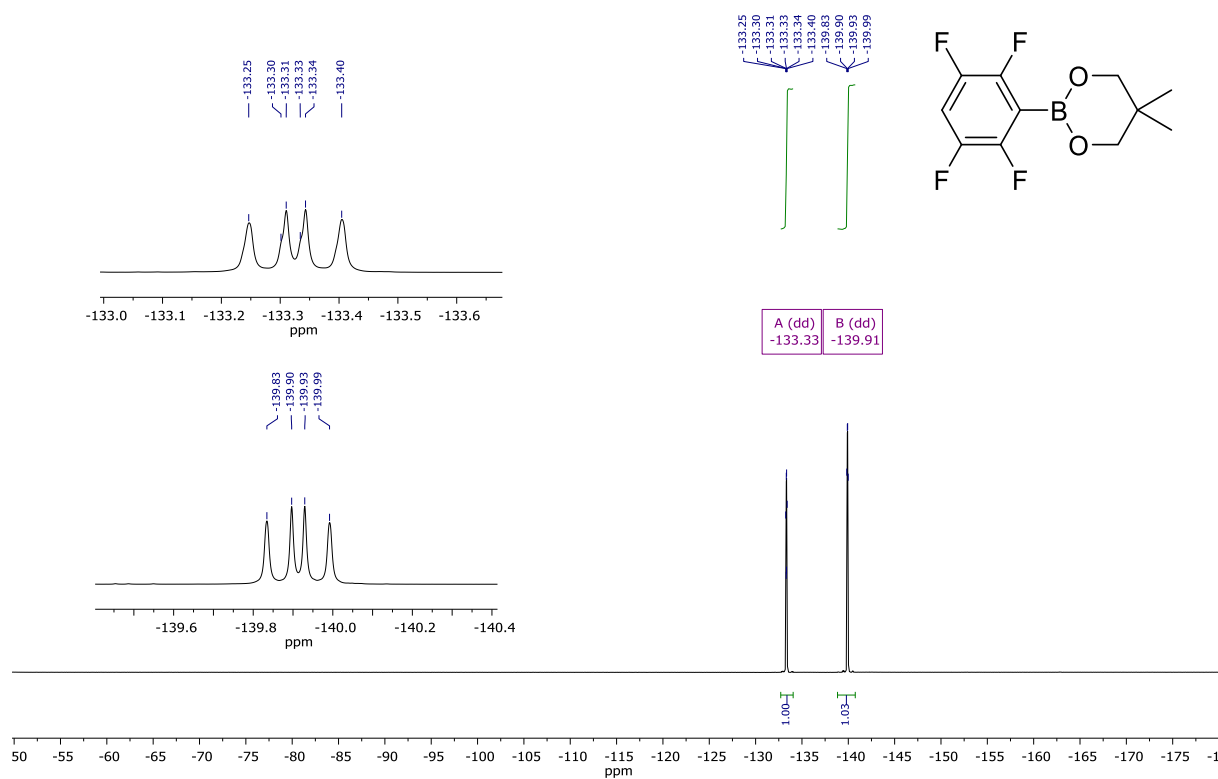Figure S171  $^{19}\text{F-NMR}$  { $^1\text{H}$ }: 5,5-Dimethyl-2-(2,3,5,6-tetrafluorophenyl)-1,3,2-dioxaborinane

$^{13}\text{C}$  NMR (75 MHz, Chloroform- $d_3$ )  $\delta$  147.91 (dddd,  $J = 245.8, 13.0, 11.1, 3.6$  Hz), 145.64 (dddd, 248.3, 16.5, 8.8, 3.8 Hz), 114.94 – 110.71 (m), 107.18 (t, 1.6 Hz), 72.72, 31.77, 21.38.

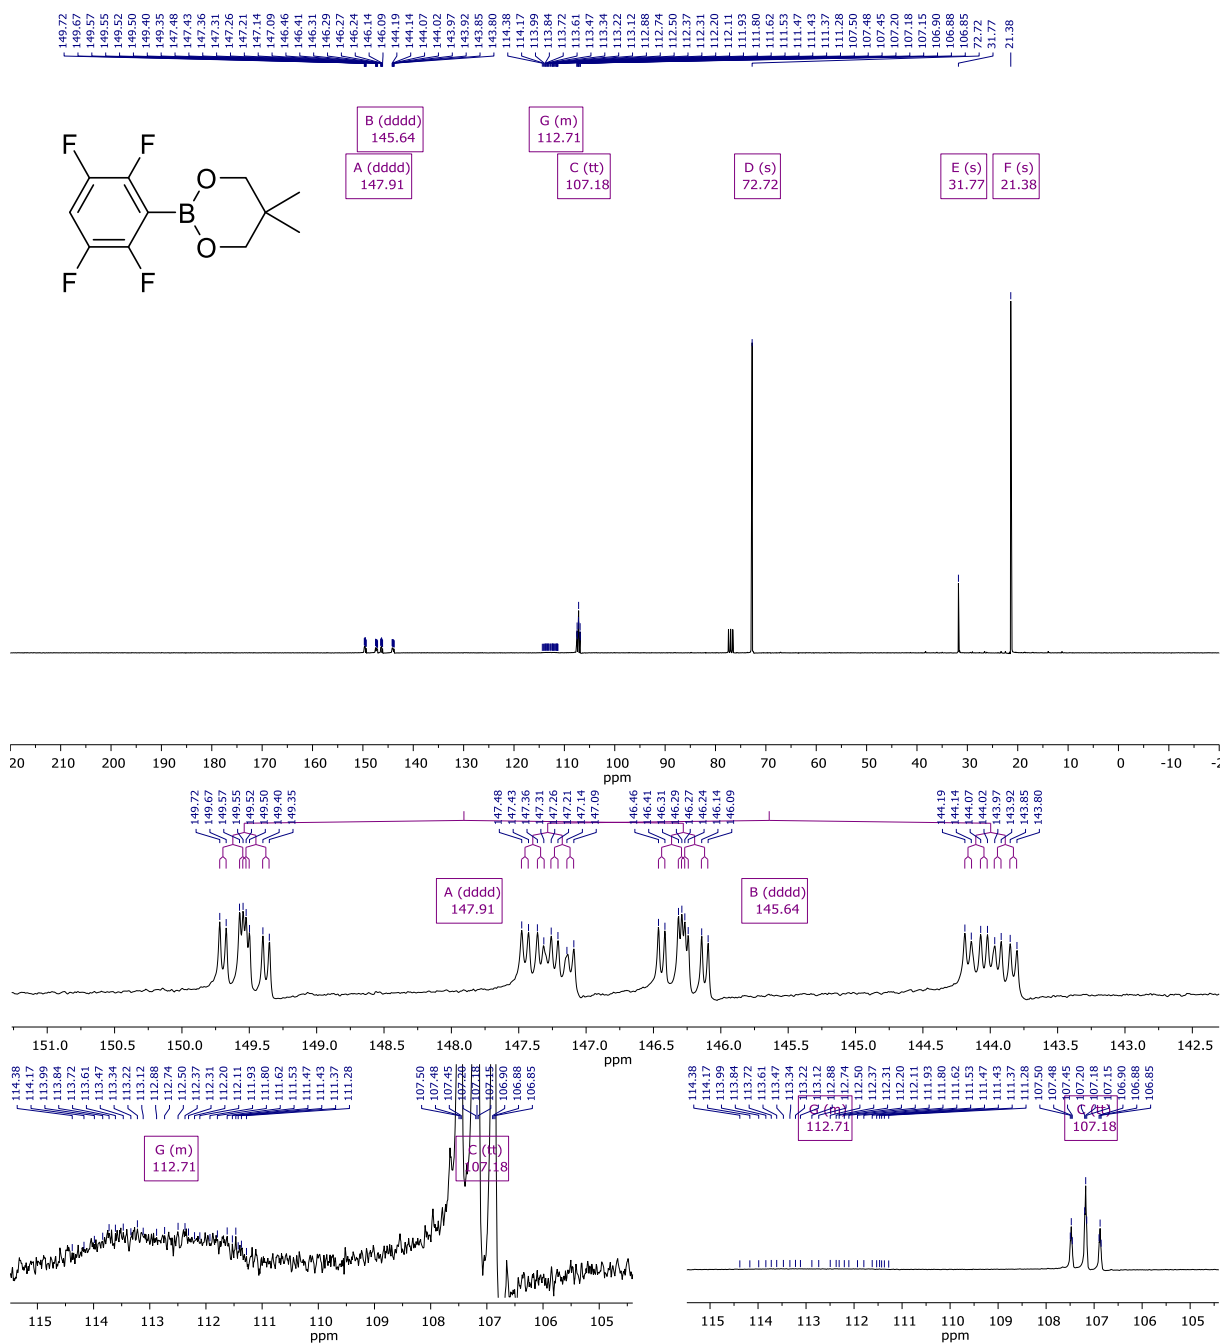

Figure S172  $^{13}\text{C}$  NMR: 5,5-Dimethyl-2-(2,3,5,6-tetrafluorophenyl)-1,3,2-dioxaborinane

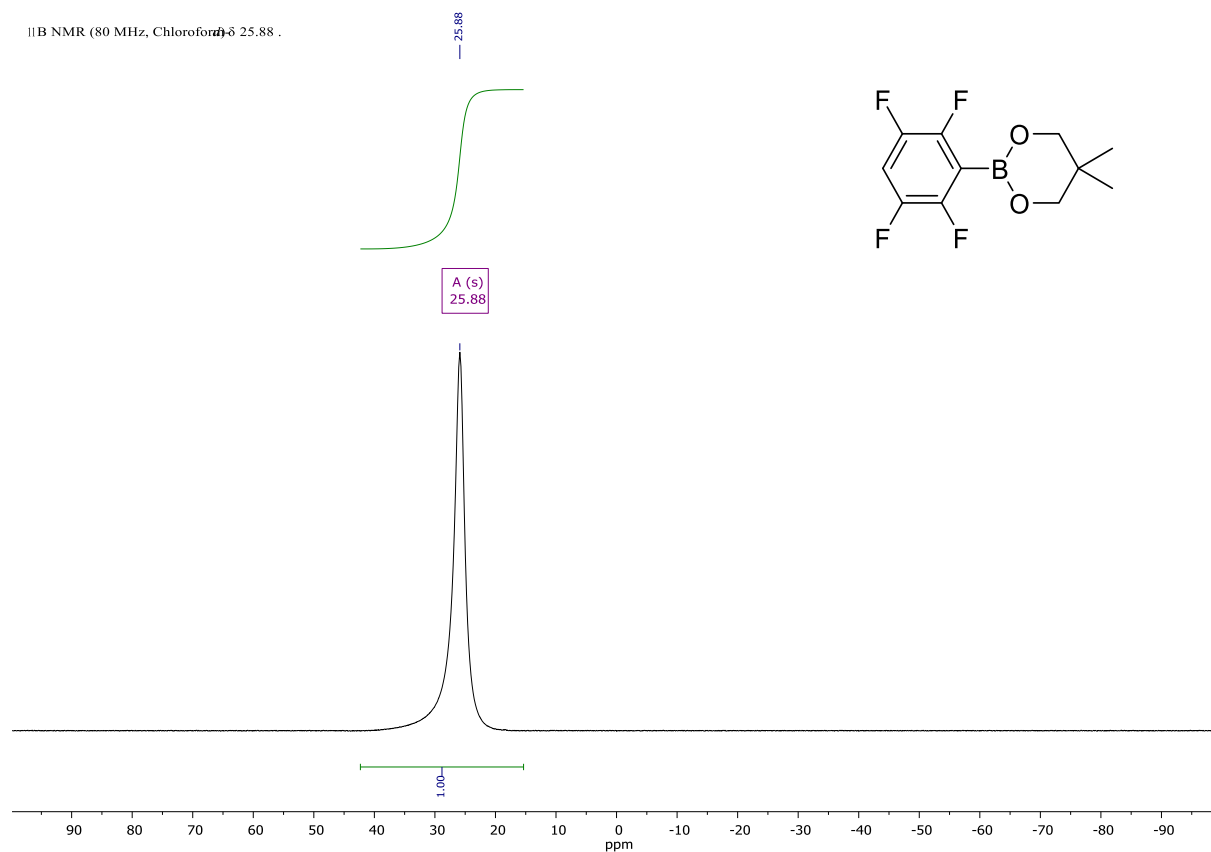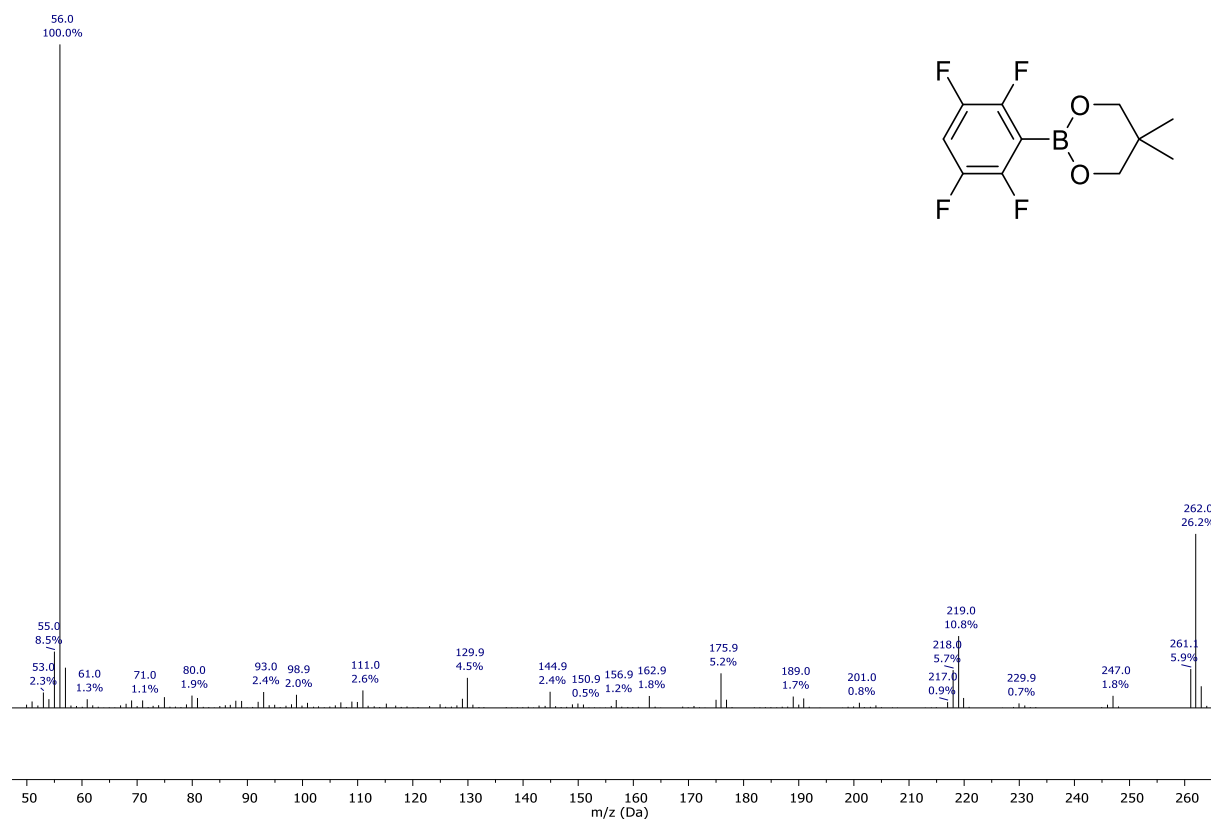

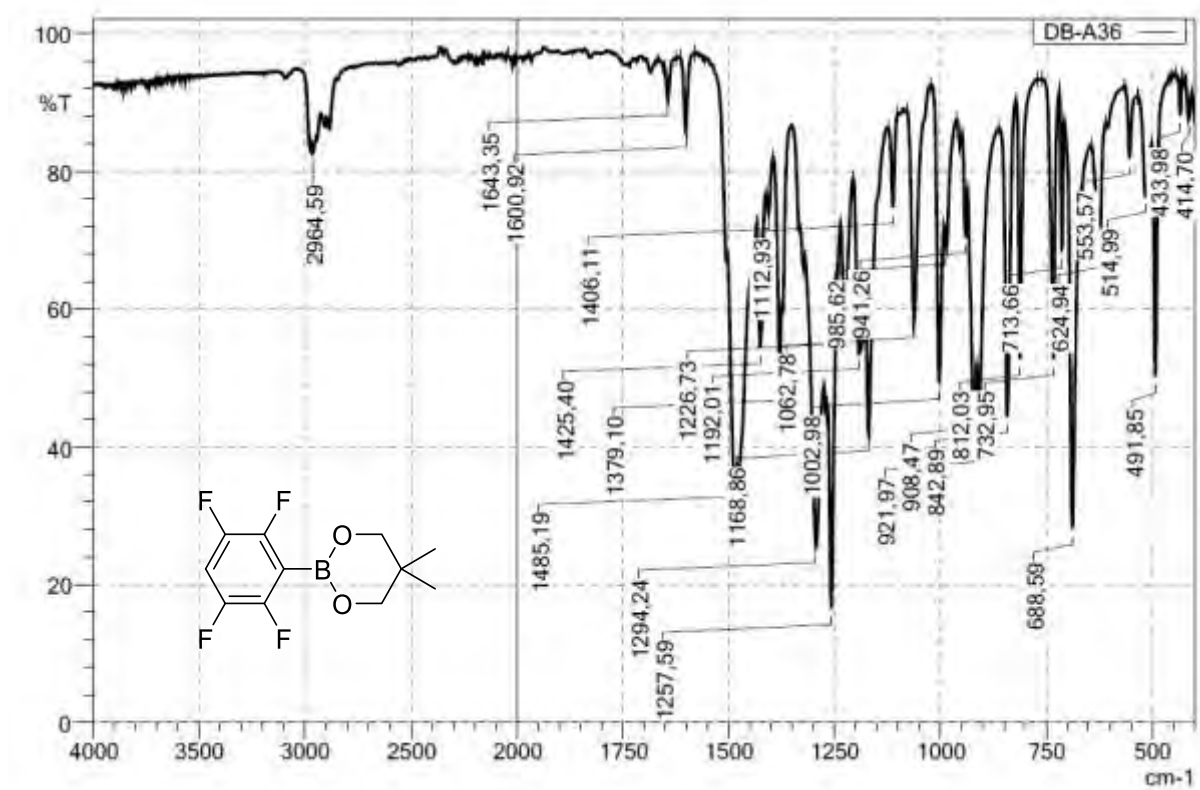

Figure S175 IR (ATR)-Spectrum: 5,5-Dimethyl-2-(2,3,5,6-tetrafluorophenyl)-1,3,2-dioxaborinane

## 6-Methyl-2-(2,3,4-trifluorophenyl)-1,3,6,2-dioxazaborocane-4,8-dione (16)

$^1\text{H NMR}$  (250 MHz,  $\text{DMSO-d}_6$ )  $\delta$  7.39 – 7.20 (m, 1H), 4.43 (dd,  $J = 17.3, 0.9$  Hz, 1H), 4.12 (dd,  $J = 17.3$  Hz, 1H), 2.65 (s, 1H).

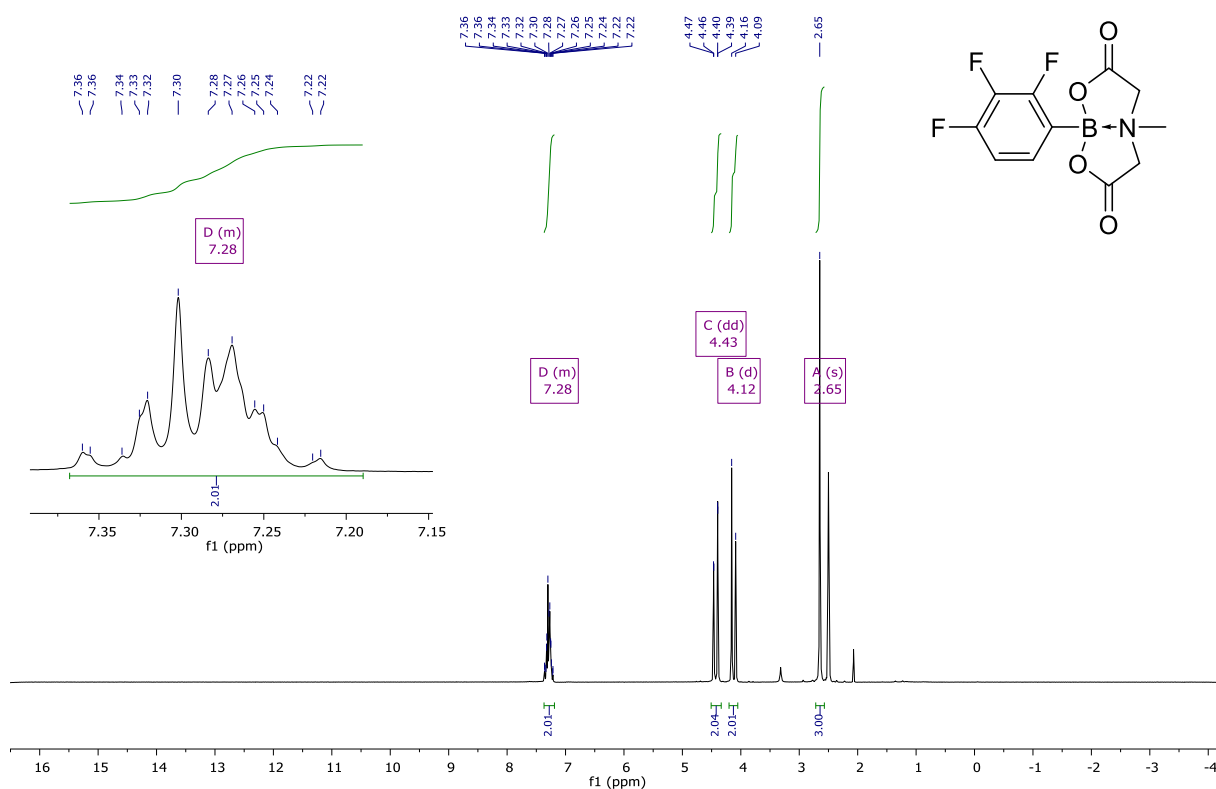Figure S176  $^1\text{H-NMR}$ : 6-Methyl-2-(2,3,4-trifluorophenyl)-1,3,6,2-dioxazaborocane-4,8-dione

$^{19}\text{F NMR}$  (235 MHz,  $\text{DMSO-d}_6$ )  $\delta$  -128.90 (dd,  $J = 23.0, 8.2$  Hz), -134.33 (dd,  $J = 21.0, 8.2$  Hz), -163.02 (dd,  $J = 23.0, 20.9$  Hz).

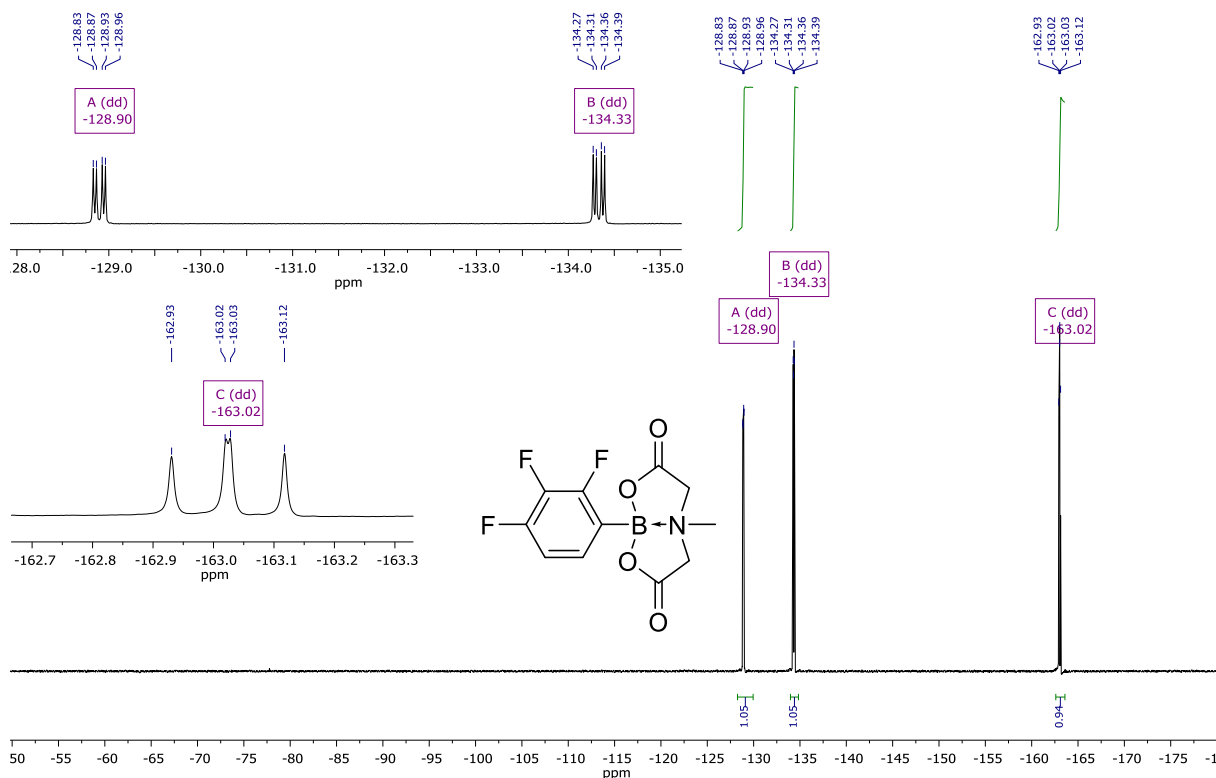Figure S177  $^{19}\text{F-NMR}$   $\{^1\text{H}\}$ : 6-Methyl-2-(2,3,4-trifluorophenyl)-1,3,6,2-dioxazaborocane-4,8-dione

$^{13}\text{C}$  NMR (63 MHz,  $\text{DMSO-d}_6$ )  $\delta$  169.26, 153.76 (ddd, = 244.6, 8.7, 3.1 Hz), 151.61 (ddd, 248.5, 9.8, 3.6 Hz), 139.27 (ddd, = 249.0, 18.1, 14.7 Hz), 129.54 – 128.96 (m), 113.21 (dd, 2, 3.3 Hz), 62.76 (d,  $J = 1.5$  Hz), 47.97.

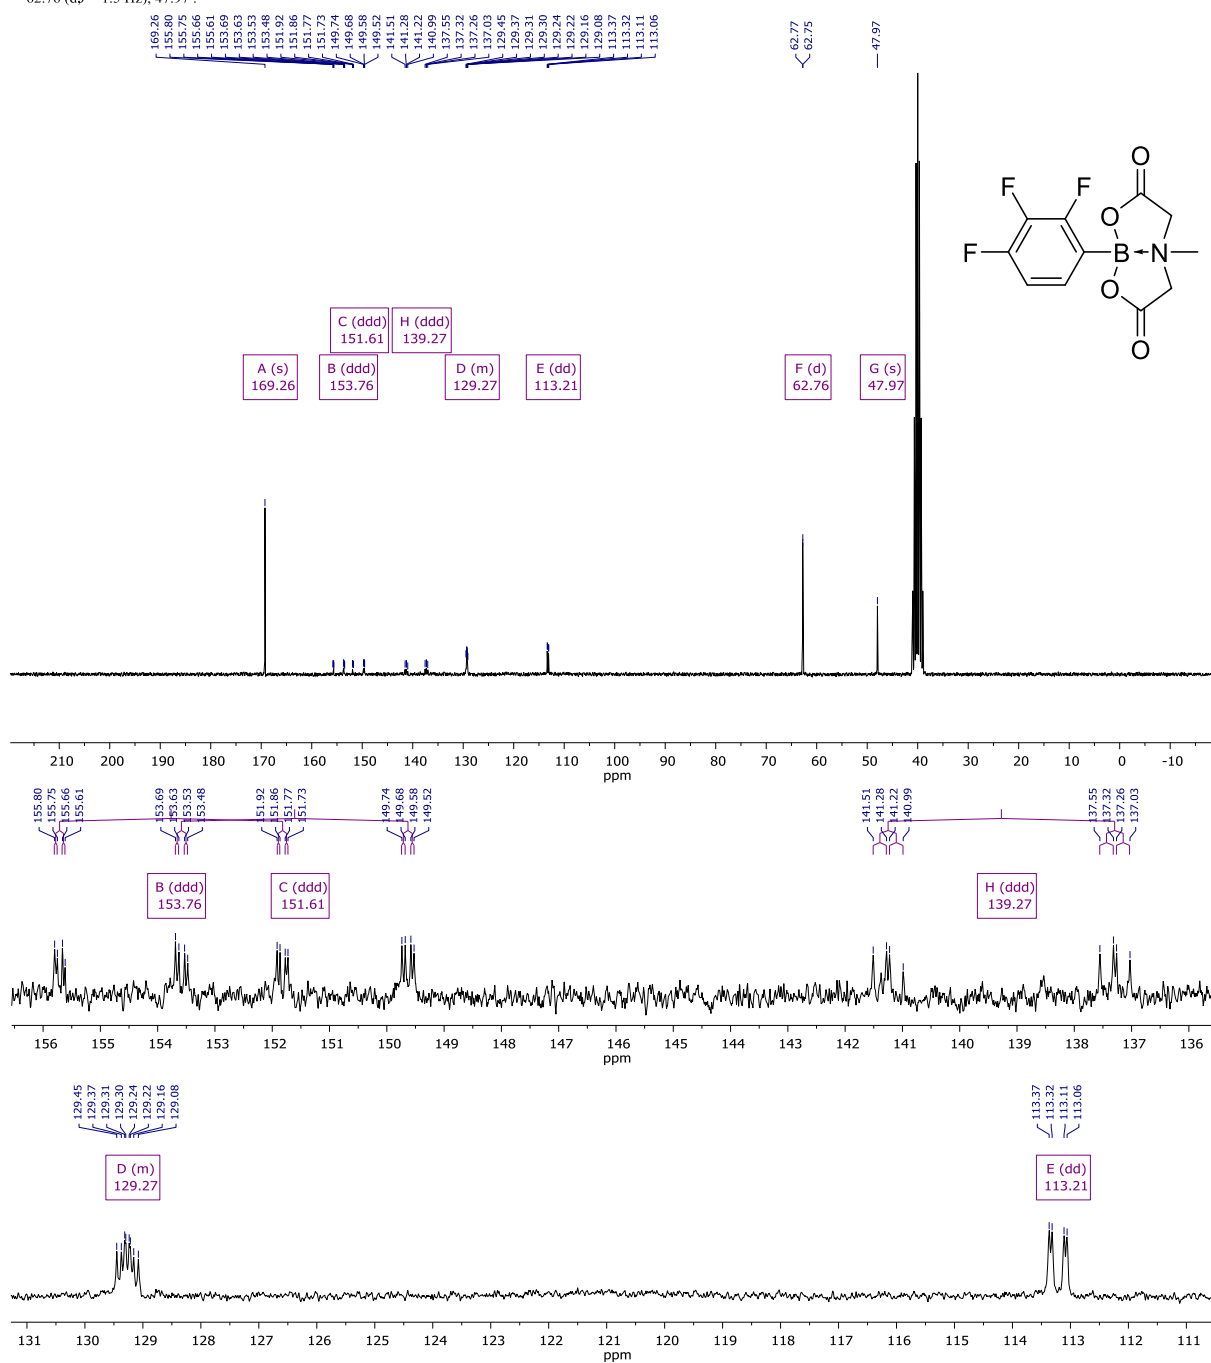

Figure S178  $^{13}\text{C}$  NMR: 6-Methyl-2-(2,3,4-trifluorophenyl)-1,3,6,2-dioxazaborocane-4,8-dione

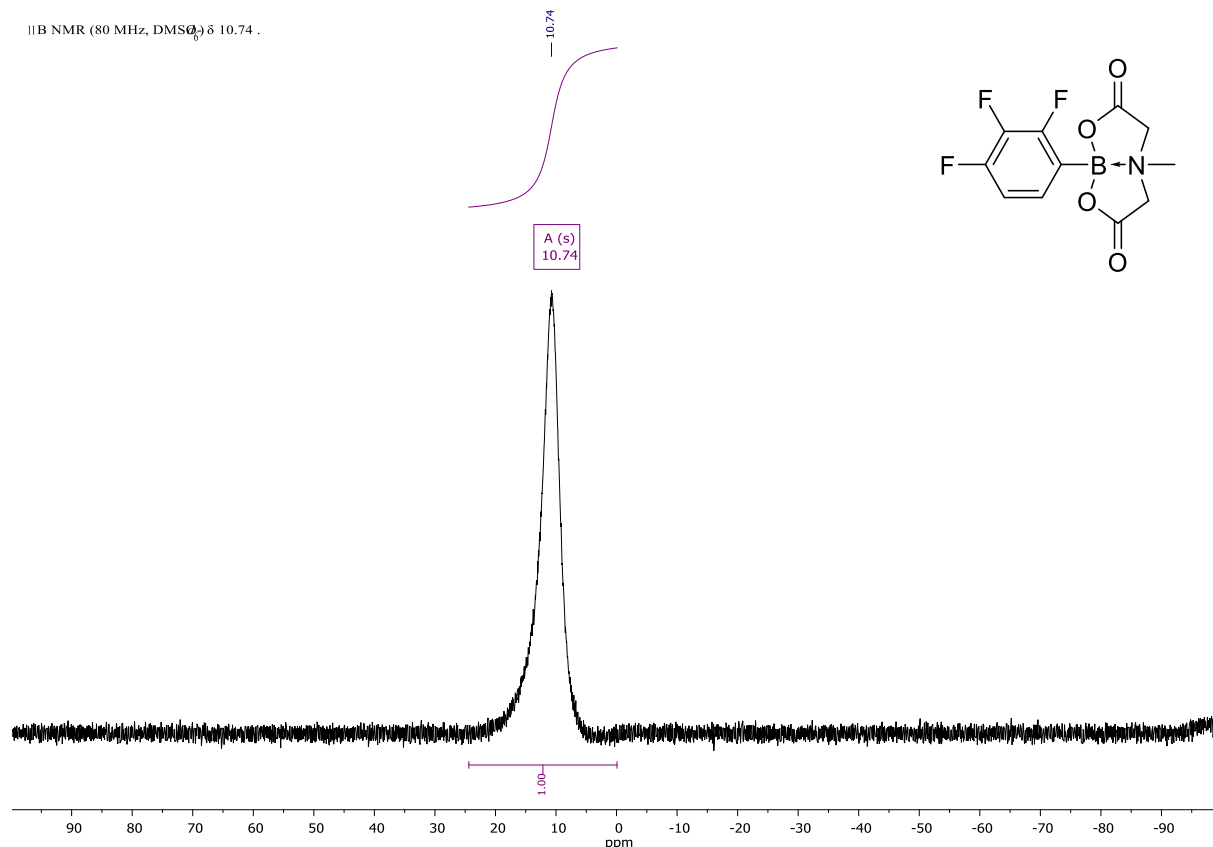

Figure S179  $^{11}\text{B}$ -NMR: 6-Methyl-2-(2,3,4-trifluorophenyl)-1,3,6,2-dioxazaborocane-4,8-dione

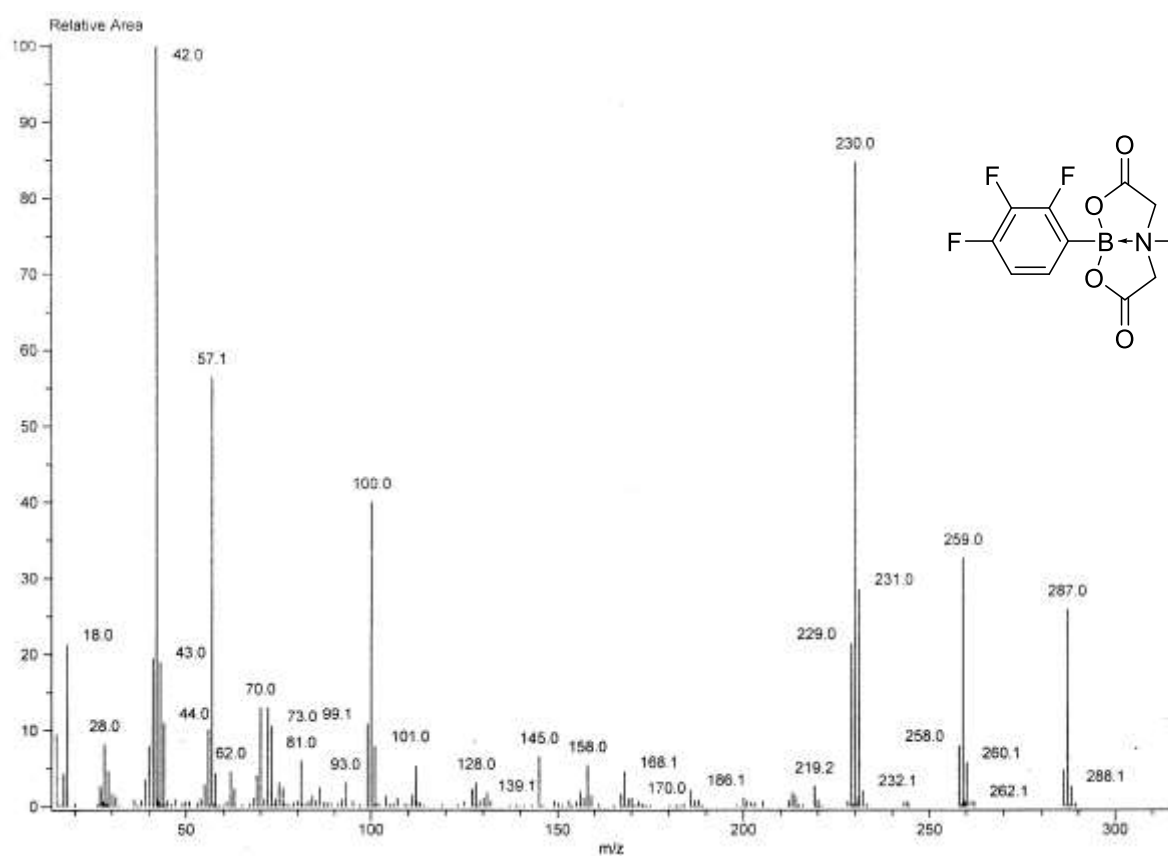

Figure S180 EI-Spectrum ( $\text{EI}^+$ ): 6-Methyl-2-(2,3,4-trifluorophenyl)-1,3,6,2-dioxazaborocane-4,8-dione



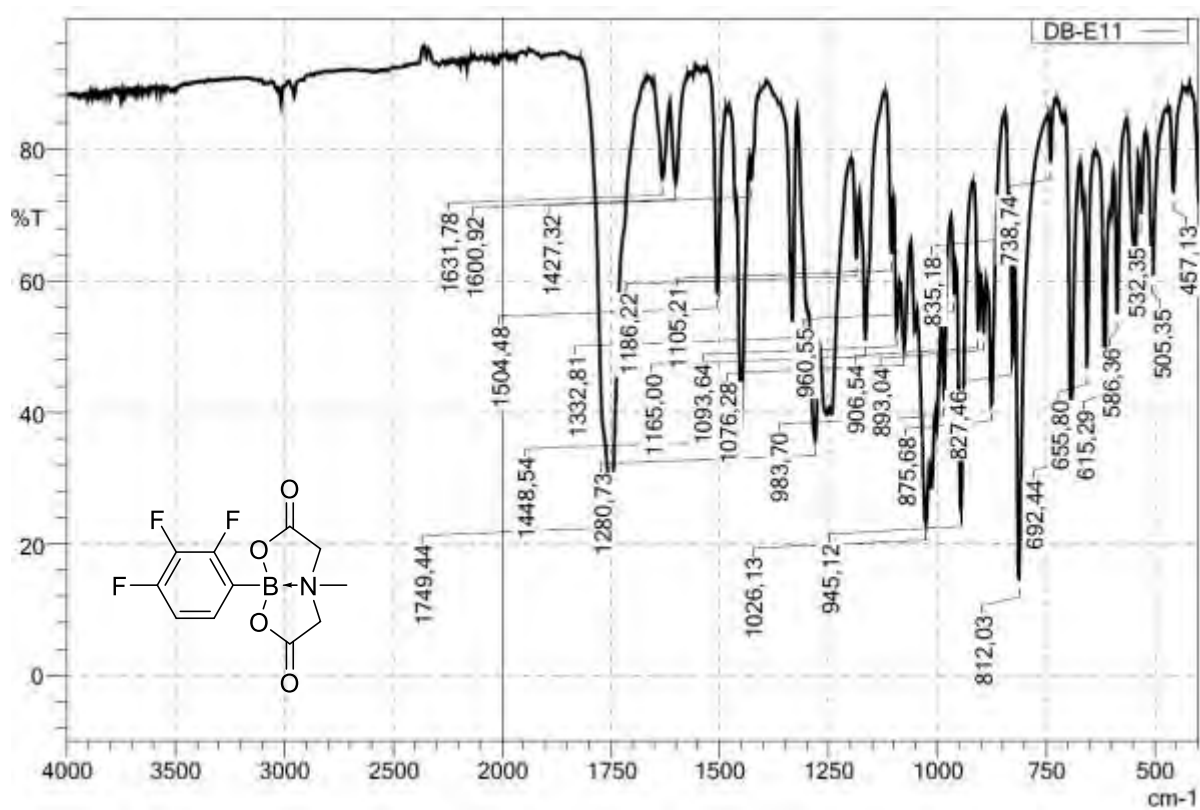

Figure S181 IR (ATR)-Spectrum: 6-Methyl-2-(2,3,4-trifluorophenyl)-1,3,6,2-dioxazaborocane-4,8-dione
